# Supplementary material for: RNA Pol IV induces antagonistic parent-of-origin effects on Arabidopsis endosperm
Source: PLoS Biol. 2022 Apr 7;20(4):e3001602. doi: 10.1371/journal.pbio.3001602 (PMC9017945; doi:10.1371/journal.pbio.3001602)
Supplement: S3 Data — Analysis of the allelic origins of sRNAs in nrpd1−/−, mat nrpd1+/−, and pat nrpd1+/−. sRNA, small RNA. (XLSX) [file pbio.3001602.s024.xlsx]

## Sheet: Fig S4
	Fig S4: RNA Pol IV-dependent small RNAs arise from both maternal and paternal alleles. SNPs between Col-0 and Ler were used to identify parental origins of small RNAs arising from genes and transposable elements (TEs). Differentially expressed loci were identified using DESeq2 as described in Figure 1. Loci with a sum of at least ten allele-specific reads in three wild-type Ler x Col-0 replicates…
	Genes						Transposons						Genes						Transposons
	21ntsRNA Log2 (nrpd1-/-/WT)						21ntsRNA Log2 (nrpd1-/-/WT)						24ntsRNA Log2 (nrpd1-/-/WT)						24ntsRNA Log2 (nrpd1-/-/WT)
% maternal	>80	80-60	60-40	40-20	<20		>80	80-60	60-40	40-20	<20		>80	80-60	60-40	40-20	<20		>80	80-60	60-40	40-20	<20
	-5.82044	-4.17355	-4.21045	1.19001	-5.39693		-1.896	-2.12584	-2.42206	-4.04063	-4.18331		-3.33698	-3.63556	-3.83916	-3.54296	-5.25618		-3.46266	-2.22776	1.57524	-1.39968	-2.19308
	-4.17459	-3.14619	-1.74257	1.24236	-6.00801		-4.28888	-4.03705	1.82473	-3.76012	-4.01619		-4.03091	-4.91756	-4.40123	4.69412	-2.18831		-2.69416	-1.44477	3.03154	-2.01852	-3.23766
	-4.09846	-3.50537	-4.98439	-2.88159	-7.56005		-4.98519	-3.65124	-3.15381	-2.21713	-5.37823		-3.74495	-2.26349	1.93313	-4.04149	-3.47255		-2.54019	-2.22043	-2.48431	-1.45535	-3.23227
	-3.76969	-4.97592	-4.36404	-3.8867	-6.65801		-5.23927	-3.5463	-3.47674	-4.84335	-6.70225		-2.25586	-3.94945	-4.6074	-4.54449	-2.37048		-2.31257	-1.61989	-2.06501	-2.2714	-1.76413
	-5.43051	-1.8851	-4.596	-4.00948	-5.13479		-3.05984	-2.22249	-2.99982	-3.7595	-4.48754		-3.94015	-3.75715	-4.65923	-4.26334	-4.16813		-2.78978	-4.17207	-1.36506	-2.68832	-1.77376
	-5.6617	-3.99424	-5.52082	-5.48023	1.06347		-5.22831	-4.44315	-4.30936	-2.50636	-4.30069		-2.59582	1.04599	-4.2872	-4.12367	-6.09803		1.48018	-2.42852	-2.60341	-2.26044	-1.67523
	-5.2351	-4.6821	-5.81207	-4.73955	-4.0954		-4.26894	-2.02598	-3.14705	-3.7338	-6.64529		-4.92177	-4.23871	-3.48069	-2.10143	-3.8376		-1.16484	-1.78437	-2.11308	-3.74762	-2.15797
	-3.93197	-4.56652	-5.92879	-6.56723	-7.54838		-2.28618	-2.80272	-3.28181	-2.72369	-3.10883		-3.17185	-2.46471	-4.77535	-4.68144	-3.44858		-1.83019	-2.82851	-1.20246	-2.42054	-1.92712
	-5.58742	-2.53357	-5.0822	-4.55425	-5.08309		-3.18091	-2.88978	-2.52794	-3.15377	-6.02857		-3.05402	-1.69661	-4.89189	-5.3787	-3.93545		-1.5177	-2.2382	-1.26603	-2.35138	-1.88602
	-6.47301	-3.0913	-5.34986	-5.74625	-5.59128		-3.62596	-3.32685	-3.47604	-4.26136	-5.9614		-5.82931	-3.50746	-3.14509	-5.50999	-2.45967		-2.22436	-2.16629	2.33716	-1.9315	-1.69284
	-5.88468	-5.65929	-2.42874	-7.90881	-5.72322		-3.16993	-3.2787	-2.48253	-3.3287	-4.0357		-1.88108	-4.23598	-3.58194	-5.4505	-2.69831		-2.69144	-1.90028	-2.98999	-2.92826	-1.99886
	-5.86167	-2.27011	1.73034	-4.39999	-7.3766		-2.08285	-2.46643	-3.05952	-4.00533	-6.60937		-2.61486	-3.77033	-2.4023	-3.49076	-1.89259		-2.35031	-1.99813	-2.59735	-1.20566	-1.59717
	-3.28245	-5.69196	-3.44264	-4.13207	-3.53344		-3.46787	-3.49005	-3.02576	-4.40764	-5.51537		-3.79811	-4.08514	-2.6431	-3.6635	-3.19404		-1.62668	-3.73586	-2.22502	-2.89509	-2.69871
	-6.30674	-3.37947	-3.87961	-3.27234	-4.89973		-3.72573	-2.30454	-2.97191	-4.17242	-5.23271		-4.07327	-1.41236	-4.14288	-4.73763	-2.21497		-2.52113	-1.98858	-2.85033	-2.22815	-2.16412
	-2.02414	-3.28976	-2.90144	-3.92109	-3.6786		-4.4829	-3.03035	-1.9456	-3.00761	-5.51444		-2.93425	-2.28608	-2.07484	-3.9001	-2.67097		-2.48117	-2.42376	-1.57787	-2.72589	-1.89126
	-6.20749	-4.13584	-3.26795	-4.49349	-5.74738		-4.79696	-3.33975	-5.09585	-3.26977	-5.20432		-2.60671	-4.11149	-5.21544	-4.37498	-2.89798		-1.12886	-2.06861	-1.87359	-1.83058	-2.04702
	-5.79485	2.67437	-3.11218	3.77109	-6.53794		-4.9976	-4.24833	-4.38914	-4.04332	-5.71774		-1.05763	-4.16021	-3.81116	-2.9105	-3.43575		-2.40699	-3.00358	-1.55228	-2.82511	2.3222
	-5.23655	-4.18197	-4.10626	-2.38271	-4.58531		-2.77613	-5.41949	-3.26041	-4.60076	-4.45126		-4.4867	-3.0031	-6.33506	-2.50302	-2.07673		-1.86961	-2.97079	-1.9586	-2.64715	-1.25599
	-4.99399	-4.2381	-3.30051	-7.38447	1.18441		-3.97026	-4.35015	-3.7949	-4.61606	-4.93801		-3.93781	-5.7965	3.5256	-3.62217	-2.55109		-2.10359	-1.38468	-2.21733	-2.9502	-2.5529
	-1.5811	-2.5799	-6.64873	-7.07341	-3.85107		-5.74189	-5.63183	-3.8879	-3.72142	-5.3243		-1.99711	-4.27386	-4.67882	-4.69899	-3.49599		-3.34142	-2.31851	-2.20143	-1.84907	1.49527
	-2.68741	-2.78702	-4.53135	-3.90362	-5.81285		-3.19277	-2.04139	-3.10282	-3.25383	-3.4633		-3.83251	-1.75997	-3.87763	-3.05996	-1.87347		-3.71678	-2.64622	-3.23878	-2.26683	-2.73542
	-4.13923	-3.68288	-3.43801	-3.21537	-4.62253		-3.52745	-2.95406	-6.35933	-3.93798	-3.65537		-3.24343	-4.05725	-5.48544	-4.98526	-4.02122		-3.16328	-3.51556	-2.32657	-1.76718	-2.70647
	-3.43467	-5.19036	-6.1356	-7.06325	-6.27724		-2.11633	-2.65242	-4.53848	-4.19902	-6.87828		-4.62234	-3.15924	-6.01601	-4.1378	-4.88672		-3.5707	-1.93589	-2.92917	-3.07586	-2.16634
	-3.62963	-3.43936	-2.71682	-6.86687	-5.68987		-4.60953	-3.18025	-1.40711	-4.83303	-7.82026		-1.75735	-2.36483	-3.45769	-4.5164	-4.46151		-3.88243	-1.61345	-1.98409	-1.47072	-3.37293
	-5.52216	-2.60701	-3.39093	-6.01691	-6.58383		-2.53923	-3.22608	-3.16573	-3.5291	-4.79684		-4.06534	-3.75223	-4.75915	-4.56151	-5.21158		-2.28944	-2.11294	-2.98813	-3.69472	-4.38229
	-5.18539	-4.77312	-3.96192	-3.02593	-3.15172		1.32647	-5.23471	-3.072	-3.75426	-3.85196		-3.32499	-4.75158	-4.69358	-5.42103	-2.59394		-2.16814	-2.00829	-2.52203	-3.51068	-3.59298
	-5.5566	-3.8602	-4.48809	-4.55027	-4.13595		-3.98628	-3.94473	-3.64558	-6.26918	-3.34232		-3.19631	-4.4283	-3.93215	-4.13635	-4.85428		-1.67974	-1.45927	-1.18377	-2.04393	-2.19533
	-4.65075	-4.63073	-5.60329	-6.07148	-3.88446		-3.27719	-2.25428	-5.63857	-7.31429	-4.66879		-3.42955	-5.34171	-3.81033	-2.52397	-3.06126		-2.43171	-2.81734	-2.94802	-3.03266	-2.80962
	-5.50441	-2.61015	-3.92047	-4.00431	-5.93174		-5.14293	-4.71142	-3.91267	-5.63825	-5.15324		-3.53325	2.6068	-1.42151	-3.57603	-3.73699		-1.80698	-3.44774	-3.20754	-1.44056	-2.8186
	-1.71237	-3.56326	-5.09658	-3.09303	-3.90591		-4.8098	-4.33901	-3.6804	-6.31272	-6.16355		-4.06159	-3.19158	-5.93373	-3.23138	-3.51832		-2.19395	-1.73033	1.16557	-1.93251	-3.00671
	-5.50341	-4.31113	-5.02192	-5.77158	-8.7435		-3.15032	-1.44111	-3.73836	-4.67569	-3.90032		-1.46666	-3.58263	-3.20631	-3.96741	-6.67241		-2.18745	-2.233	-2.7511	-2.61877	-1.25599
	-3.2639	-4.08453	-4.65693	-4.08687	-3.40845		-5.05507	-4.1019	-3.43726	-5.14662	-4.57086		-3.28336	-3.3223	-4.04874	-4.64779	-4.79416		-2.04195	-3.12858	-2.88696	-2.25535	-1.9032
	-5.78584	-2.59561	-3.52005	-4.46094	-5.66987		-2.9755	-4.05893	-4.07391	-4.99645	1.3459		-3.03399	-3.40822	-3.62045	-4.724	-5.83883		-1.71037	-1.9078	-1.89154	-2.02851	-1.52652
	-0.879119	-5.9202	-6.18634	-3.70842	-4.60802		-5.4719	-4.35346	-3.64275	-3.35569	-3.12281		-4.38189	-2.53805	-4.75165	-4.5658	-3.58075		1.32481	-2.37537	-2.54053	-2.1284	-1.72045
	-5.51755	-7.82985	1.2813	-7.05846	-6.15973		-4.01615	-2.5129	-4.27978	-3.63	-2.02172		-3.25748	-4.2433	-4.55528	-2.91086	-2.215		-2.18106	-1.98564	-2.26772	-3.2974	-2.06526
	-5.10537	-7.18994	-5.96559	-2.29846	-5.39394		-3.52923	-5.86574	-6.32121	-4.11075	-3.27519		-4.68464	-2.74676	-3.28354	-3.54441	-4.25548		3.82421	-2.50639	-1.28915	-2.12955	-3.85309
	-3.34259	-3.36765	-3.49223	-2.47726	-6.84437		-5.85636	-2.54356	-5.37138	-3.27846	-3.53014		-5.03793	-1.95117	-4.43288	-6.51894	-5.36768		-2.93672	-2.45478	-2.36964	-1.59161	-3.60162
	-3.55535	-2.85291	-4.44173	-4.62662	-4.13788		-3.99164	-3.31587	-3.82329	-1.20673	-3.82614		-3.14923	-4.5069	-2.72719	-3.15892	-3.0269		-1.56753	-2.19864	-1.86347	-2.04479	-2.95237
	-5.6091	-3.8895	-4.16173	-3.64293	-6.11598		-3.14449	-3.9114	-4.93089	-3.93072	-4.03124		-3.04669	3.66322	-3.06974	-3.06116	-4.23125		-2.65401	-2.52834	-3.23155	-2.30804	-3.03748
	-3.21531	-3.98661	-3.88442	-3.30351	-3.80616		-4.19023	-3.42414	-5.09674	-3.52561	-3.72359		-1.82836	-2.87841	-3.7259	-4.12889	-2.73816		-1.85362	-2.07139	-1.48822	-2.35196	-3.42307
	-5.07013	-3.05282	-2.65297	-5.27006	-3.61284		-4.42254	-3.02495	-3.22055	-2.73215	-3.78279		-3.97339	2.11919	-4.64483	-4.78682	-2.97144		-3.12859	-2.25981	-3.37026	-4.11335	-4.4775
	-3.52459	-4.40036	-2.45342	-4.90531	-2.68953		-3.90254	-3.29037	-5.63264	-4.44404	-6.1871		-2.74985	-4.20177	-2.63077	-3.25788	-2.17477		-1.93633	-2.05232	-3.64086	-2.74451	-4.48725
	-5.02478	-6.98725	-5.31024	-6.53349	-6.5024		-3.85394	-6.76393	-3.64972	-4.02807	-6.99574		-1.98679	-2.67319	-3.59209	-2.25859	-3.24956		-1.47891	-2.67147	-3.12919	-2.76556	-3.65448
	-3.09263	-6.49606	-5.25333	-5.28402	-4.6845		-3.8982	-4.54535	-4.80645	-3.27441	-5.5822		-4.06267	-1.89638	-2.27482	-1.78009	-4.40934		-2.95227	-3.56262	-2.61046	-2.66984	-3.36642
	-2.46097	-3.29792	-6.26459	-3.1088	-2.7417		-2.98081	-4.57136	-2.59745	-2.50616	-5.87433		-1.95653	-2.52635	-2.50599	-2.64749	-3.61063		-2.30638	-1.96309	-2.0741	-3.52729	-2.34254
	-4.38044	-5.25284	-6.3358	2.75158	-7.14403		-4.40404	-3.73412	-4.29623	-4.15341	-6.9632		-3.70464	-2.49497	-3.59393	-4.03677	-4.33616		-1.75248	-1.01005	-2.30522	-1.89239	-1.96907
	-3.24973	-4.19642	-5.39483	-3.12192	-4.89205		-4.78267	-3.38517	-5.21238	-2.75443	-4.76979		-4.30641	2.96943	-2.49622	-1.72151	-3.57099		-3.10497	-2.53348	-1.71854	-3.66622	-2.71723
	-6.20038	-2.05686	-3.93207	-5.22534	-6.15977		-5.10349	-4.14862	-6.32333	-4.23939	-5.72528		-2.79352	1.69128	-4.98432	-4.85937	-2.73866		-2.60292	-1.96749	-3.06457	-3.61597	-3.02409
	-5.03877	-4.37344	-3.59956	-2.41606	-6.18018		-1.956	-3.34126	-4.27577	-4.36149	-5.55946		-3.79881	-5.62721	-3.09639	-4.95563	-2.35831		-2.70376	-2.38023	-2.85897	-2.9231	-2.27667
	-4.79021	-4.10857	-3.26529	-1.18747	-6.95306		1.96818	-3.70164	-4.04226	-4.67518	-6.65956		-2.63572	-3.88446	-3.71296	-4.18124	-3.59482		-2.39492	-1.48159	-2.23412	-1.32273	-1.85137
	-4.50327	-3.98397	-2.92139	-3.46721	-6.76957		-3.6638	-2.7098	-1.6885	-3.65275	-4.24908		-3.01255	-1.76517	-4.99996	-4.78177	-3.66359		-2.84393	-2.40284	-2.68825	-2.24401	-1.41683
	-5.92723	-4.03154	-2.00516	-5.03253	-5.89277		-3.5639	-4.3056	-2.64003	-2.87198	-4.49219		-2.58077	-5.43815	-3.13721	-4.7544	-4.41288		-3.32168	-1.5293	-2.61652	-1.01011	-2.33195
	-5.80133	-5.11364	-2.80836	-3.97589	-5.71637		-4.87047	-2.88617	-3.04311	-2.84504	-5.26045		3.71536	-4.16659	-3.10807	-2.04923	-3.12187		-3.27439	-1.12929	-1.57104	-1.4176	-2.16816
	-5.26401	-4.21861	-3.47135	-5.39323	-4.86788		-4.47316	-4.3145	-2.55668	-6.57733	-4.05914		-1.94675	-5.18987	-3.71208	-2.61903	-5.14204		-3.13511	-3.05269	-3.24355	-1.6322	-1.08951
	-3.89305	-1.95616	-4.9061	-4.90112	-4.8417		-5.2064	-3.48504	-2.60647	-6.33579	-6.56373		-2.34623	-4.08018	-4.93442	-3.31289	-2.63687		-1.71529	-2.88774	-2.1339	-2.62636	-2.53491
	-3.93131	-2.98342	-5.0303	-3.76844	-4.42863		-4.20713	-4.05726	-3.21746	-4.17224	-4.5117		-2.53817	-4.29621	2.64016	-3.52972	-3.07186		-2.18129	-1.79362	-2.71059	-1.97339	-3.22123
	-5.37777	-3.91479	-6.87556	-4.86293	-4.21611		-3.89074	-4.38701	-4.61564	-2.9468	-6.9086		-4.09582	-2.7844	-3.97535	-5.29393	-2.86969		-3.01991	-1.0834	-3.20002	-1.86331	-3.82492
	1.12445	-2.43877	-5.29696	-5.19355	-4.1999		-1.79713	-3.34351	-4.4932	-2.23823	-3.64614		-2.32465	-4.69219	-3.99323	5.42706	-3.59347		2.55373	-2.94008	-2.17262	-1.37166	-3.12194
	-5.83383	-3.99429	-5.49175	-3.66072	-4.45985		-2.39785	-2.90247	-3.37859	-3.47523	-3.34709		-2.54501	-4.97607	-5.9966	-3.36968	-2.60549		5.19949	-1.73873	-1.91483	-2.64012	-2.50868
	-5.14268	-4.38611	0.959192	-4.50148	-3.29822		-4.36763	-4.41499	-2.91196	-3.07214	-3.77258		-2.55693	-2.74752	-2.22844	2.13204	-1.74991		-2.22781	-1.84315	-2.01793	-2.11698	-2.7236
	-4.79924	-2.81496	-4.24158	-3.40992	-5.69448		-3.16469	-3.8781	-5.14285	-2.50318	-4.31012		-3.23293	-4.43245	-4.07529	-3.8277	-2.85227		-2.02653	-1.75566	-1.78644	-2.00695	-1.71055
	-4.3446	-3.01664	-3.08985	-2.94614	-7.67844		-4.69654	-3.62241	-2.99099	-2.52826	-5.06203		-1.75215	-5.00701	-4.53225	-3.25655	-4.09996		-2.4585	-1.74273	-3.52733	-2.12798	-2.35124
	-5.05102	-4.21948	-3.4398		-7.16047		-4.19593	-2.48431	-2.69221	-3.90667	-4.80627		-2.54684	-4.28446	-3.24655	-3.50236	-3.73995		-3.44958	-3.26762	-2.993	-1.40643	-2.23205
	-5.15308	-2.50475	-2.66348		-4.43733		-2.65183	-3.78191	-3.51964	-3.93805	-6.17957		-3.45446	-2.03072	-3.6863	-4.55172	-4.3746		-2.65363	-2.39344	-2.07653	-1.8959	-2.57344
	-4.76836	1.56794	-3.70239		-2.81093		-3.79999	-2.83595	-5.0197	-1.84435	-5.8224		-2.01854	-3.13326	-4.68165	-3.77996	-4.22871		-2.21066	-2.42021	-1.788	-1.69641	-2.82946
	-2.81263	-3.62733	-4.77182		-5.38713		-3.45647	-2.71912	-3.34217	-3.69486	-5.54532		-4.25363	-3.69489	-1.85831	-5.76497	-4.58919		-2.83839	-2.14754	-1.64944	-1.88759	-1.79029
	-2.98517	-6.5571	-4.95999		-5.93807		-2.84526	-2.93703	-3.24701	-5.7794	-5.37331		-3.34315	-3.23545	-4.06647	-4.66053	-2.88429		-1.71238	-2.42294	-0.8981	-2.79084	-3.59284
	-5.72728	-3.41935	-7.71944		-4.7742		-4.69857	-5.95536	-3.18857	-2.63023	-6.2751		-3.03748	-4.40775	-2.95135	-4.12037	-4.95735		-1.75658	-2.52669	-1.2949	-4.01842	-3.5765
	-5.32622	-5.45478	-3.39399		-3.27282		-3.17426	-3.78511	-2.87839	-3.01343	-5.2808		-3.04535	-3.76367	-4.1302	4.65307	-5.2552		-3.12661	-2.01463	-1.34457	-2.32754	-2.95902
	-5.55738	1.28278	-2.95853		-4.88655		-4.94659	-5.31271	-2.72268	-4.06663	-2.78146		-3.34941	-3.2444	-2.40928	-2.41359	-4.65084		-2.62282	-2.19885	-1.50576	-1.43662	-3.18474
	-4.78793	-3.91122	-4.11825		-6.77241		-2.02345	-2.95715	-2.62407	-4.08098	-5.99021		-3.38374	-3.57044	-4.61581	-2.58009	-3.46217		-1.52769	-2.5861	-1.94398	-3.43567	-1.56205
	-4.84109	-3.0209	-3.97198		-4.34584		-2.79432	-3.62884	-4.27553	-4.10895	-5.01943		-2.85079	-5.05826	-4.36018	-3.79765	-4.10036		-2.28384	-3.31368	-1.21768	-2.99386	-3.09636
	3.09452	-2.76713			-3.41152		-2.91487	-3.7868	-4.85226	-3.71061	-5.70635		-3.72539	-6.787	-2.72777	-4.49845	3.00613		-1.30375	-2.77356	-2.5259	-2.92819	3.10316
	-5.94529	-4.38423			-5.55537		-2.54149	-2.84062	-3.72311	-3.64853	-4.85332		2.19948	-4.01855	-5.82416	-3.85708	-3.3021		-1.22446	-3.13594	-2.07561	-2.89343	-2.71026
	-5.85474	-3.97224			-3.90444		-3.77164	-4.78847	-3.53504	-3.84858	-3.25464		-4.67128	-4.19924	-3.26667	-3.93276	-2.77817		-2.38654	-1.08674	-1.82783	-2.78623	-1.88121
	-5.23002	-5.30864			-6.50633		-3.74492	-1.82081	-2.95089	-3.32104	-2.90092		-2.98215	-2.91171	-4.57794	-2.20894	-4.31968		-2.73899	-1.11588	-2.49174	-2.74405	-2.34485
	-5.7386	-5.3182			-6.90274		-2.21798	-2.3711	-3.25599	-3.53506	-4.21355		-3.53336	-3.98251	-4.66752	-3.19854	-3.51984		-2.34459	-2.42855	-2.40069	-1.28113	-2.01973
	1.49524	-3.14083			-5.82335		-3.06115	-1.72008	-4.153	-3.1058	-5.15827		-3.02695	-4.57634	-4.75478	-5.08592	-3.14984		-2.36773	-1.70836	-1.63786	-1.46898	-2.50953
	-3.45351	-6.10719			-5.58513		-6.73261	-3.42985	-3.30592	-4.63221	-5.46362		-3.73992	-4.37391	-3.93891	-3.54075	-2.8628		-2.49048	-3.16269	-2.81845	-2.41468	-3.06112
	-3.22454	-4.30598			-6.79382		-3.359	-3.08023	-3.70593	-2.84493	-4.51941		-3.12897	-3.38894	-5.68026	-3.73004	-4.25407		-1.72292	-3.99543	-2.44402	-2.01707	-2.70665
	2.7988	-3.32673			-6.53856		-3.68338	-2.26753	-3.55036	-2.9029	-4.79196		-2.46498	-3.52417	-4.54265	-2.4819	-2.81688		-3.41275	-3.09859	-1.46462	-2.22952	-1.7053
	-5.45479	1.72824			-6.51318		-2.76218	-3.63273	-3.66886	-3.17909	-3.07192		-3.45925	-4.36266	-3.08773	-2.45803	-3.78574		-1.93156	-1.07606	-1.79566	-3.14603	-3.00306
	-3.67866	-4.11884			-7.53921		-3.29369	-2.48895	-3.28673	-5.10491	-3.49204		-3.18838	-2.95682	-4.76672	-2.49538	-2.70681		-3.16173	-1.98398	-1.89629	-3.67489	-2.73654
	-5.81901	-3.86232			-6.956		-3.06956	-1.64918	-4.50208	-3.79768	-5.68018		-3.22017	-2.19775	-2.8616	-3.3142	-3.79484		-1.79948	-1.63649	-2.167	-4.07455	-2.47215
	-5.69098	-3.03564			-4.17234		-5.74016	-4.28915	-2.89128	-5.41805	-3.16515		-3.0684	-4.40331	-4.00677	-4.85069	-5.98268		-2.32514	-2.56067	-2.18749	-3.07135	-2.59637
	-6.19606	2.07663			-5.90955		-4.93908	-2.45748	-2.82074	-5.13019	-3.01132		-3.11119	-2.53705	-2.28217	-5.65919	-4.27347		-2.31907	-0.669181	-2.36578	-3.52434	-3.42464
	-4.21736				-5.31257		-4.68351	-4.14218	-3.70964	-4.37021	-3.20071		-3.56189	-3.93002	-3.77823	-5.20999	-4.06888		-1.92399	-2.51215	-2.90953	-3.36519	-1.46606
	-2.20596				-4.01769		-5.47652	-4.96704	-3.82108	-1.95742	-3.55387		-4.24819	-3.72329	-4.59089	-4.82231	-3.496		-2.05118	-3.04289	-2.42962	-3.02931	-1.75451
	1.37057				-3.60136		-5.19077	-3.07141	-2.34844	-4.61929	-3.88146		-2.81776	-2.70102	-4.19662	-4.7353	-3.97077		-1.93062	-2.20538	-1.42873	-3.53058	-2.48518
	1.89661				-2.57925		-1.92019	-3.58683	-2.87649	-4.03727	-5.46573		-3.42838	-4.28203	-4.50237	-2.36756	-3.45297		-2.19534	-1.83454	-2.3945	-2.59719	-2.40341
	-3.60255				-4.79602		-4.1817	-2.96007	-5.45606	-3.86418	-4.27407		-3.3116	-4.97321	-3.6171	-3.62387	-3.07408		-2.93929	-1.73346	-2.62551	-2.23898	-3.20353
	-4.45497				-3.84104		-4.80333	-3.60945	-3.19101	-2.87341	-3.12595		-4.22856	-3.75491	-4.97292	-3.45593	-4.63156		-2.44753	-2.87361	-2.03536	-3.10251	-4.2193
	-6.26373						-3.53379	-3.77032	-4.13771	-4.05758	-3.40637		-3.71702	-3.60525	-3.20066	-2.04284	-3.07912		-1.86601	-2.12032	-2.3276	-3.57806	-3.08095
	-6.56151						-2.47729	-4.39281	-2.99774	-3.35547	-6.58883		-3.5882	-4.23137	-4.28011	-3.65523	-3.04563		-3.82517	-3.11169	-2.02505	-2.60616	-3.89088
	-5.44169						-4.54828	-4.60885	-4.09639	-2.91753	-5.0226		-4.00142	-3.47607	-4.17401	-1.9143	-5.6298		-2.12275	-2.136	-2.84952	-2.4324	-3.10199
	-2.9786						-4.82815	-4.0029	-4.10422	-3.81555	-4.54918		-3.13963	-4.61538	-4.54918	-3.53274	-3.10655		-3.42408	-2.53577	-2.81327	-3.27698	-2.69984
	-3.88965						-3.00772	-4.33982	-3.83764	-3.76851	-6.70094		-3.74469	-3.96095	-4.84991	-3.44609	-3.53616		-2.39727	-1.35026	-1.72662	-2.78372	-3.40456
	0.949551						-3.27458	-2.78806	-2.97497	-4.81354	-4.82238		-3.47956	-4.42776	-3.52141	-1.75155	-4.64352		-2.62682	-1.73291	-3.07142	-2.2964	-2.18267
	-4.18469						-4.50091	-3.21682	-4.38321	-3.25901	-3.36871		-3.31555	-4.23491	-3.14216	-3.56209	-2.11385		-2.5627	-2.45469	-2.02867	-3.22918	-3.94722
	-5.50795						-5.25859	-3.30607	-2.93274	-1.57692	-3.05417		-3.21711	-4.06823	-2.86578	-3.05378	-3.63815		-1.97609	-1.69057	-2.04953	-2.00332	-1.9538
	-5.46701						-5.5438	-3.54562	-2.95807	-4.38779	-4.53647		-3.76086	-4.4974	-4.46817	-3.70315	-3.52304		-2.32261	-2.33271	-2.53954	-1.84849	-1.70797
	-7.75701						-3.83056	-3.13094	-3.79982	-3.98005	-5.04928		-3.1643	-4.31988	-2.67942	-3.31692	-3.10666		1.32324	-3.10803	-2.01765	-2.95971	-1.98021
	-2.44319						-3.17462	-4.33681	-3.54278	-3.2414	-1.9768		-2.92466	-2.81693	-4.34291	-4.99424	-2.23075		-2.58532	-1.54084	-2.31847	-2.34621	-2.99367
	-5.55465						-3.38795	-3.21856	-2.1401	-6.25159	-4.12293		-3.4552	-2.71621	-1.84793	-3.69641	-4.0408		-1.40718	-1.51911	-1.18802	-2.20925	-3.15681
	-4.62339						-3.88698	-2.24442	-3.57427	-5.11624	-2.03743		-3.07802	-4.59406	-2.3871	-3.02169	-4.21037		-3.21926	-2.49253	-2.20535	-2.12709	-2.09152
	-5.95104						-5.98784	-1.94074	-3.3428	-3.79817	-3.73954		-3.09477	-3.57981	-3.50348	-3.62048	-6.02929		-2.27408	-1.92625	-1.97614	-2.38477	-2.65656
	-6.90829						-5.5667	-3.09806	-3.17369	-2.18079	-5.44554		-3.8348	-4.31925	-5.27365	-5.6574	-5.34749		-2.36855	2.06416	-1.37993	-1.46445	-3.43605
	-5.12889						-3.96746	-2.20018	-2.9916	-3.12999	-5.14191		-3.29586	-2.96088	-5.8675	-5.02471	-4.1396		-2.79573	-1.52994	-2.08166	-2.11431	2.10458
	-4.53389						-3.32042	-2.75108	-4.22298	-4.57966	-4.42204		-2.80677	-4.14716	-5.7751	-3.11582	-5.63806		-2.7316	-2.33661	-2.38407	3.72574	-1.70521
	-3.3628						-3.35352	-4.34162	-4.13767	-2.16068	-5.39672		-4.5042	-4.13687	-3.73014	-3.19171	-4.51433		-2.09365	-3.26801	-2.45796	-1.95184	-2.49606
	-4.14283						-3.66062	-2.85911	-3.02323	-2.71898	-5.30383		-3.27515	-4.58905	-3.10703	-3.95358	-3.41701		-1.22567	-2.56417	-1.48933	-2.80151	-2.57138
	-4.64105						-5.323	-1.59521	-2.75706	-2.33625	-4.53081		-4.66713	-5.32508	-3.38943	-6.20561	-4.97295		-1.62474	-1.92941	-3.0501	-2.80228	-2.50129
	-2.85989						-2.9449	-6.03521	-2.58987	-3.2609	-4.46842		-2.55473	-2.83785	-4.05027	-3.92155	-1.88462		-1.84995	-1.59368	-1.69261	-3.2798	-2.68891
	-4.58469						-2.46874	-2.42682	-3.94661	-3.74353	-3.8421		-5.46653	-5.2458	-4.60493	-5.16956	-3.46241		-1.2869	-1.64616	-3.18468	-3.68729	-2.26722
	-5.0601						-4.22088	-3.26695	-2.82638	-4.75503	-5.45961		-2.53623	1.82242	-4.83453	-6.01055	-3.3617		-1.94046	-1.23197	-3.1709	-2.36521	-2.66066
	-2.74332						-4.77114	-2.91048	-3.10326	-5.27397	-4.60572		-4.54528	-4.59977	-1.75936	-4.78424	-3.05798		-1.45153	-2.54607	-3.00588	-2.34863	-2.65279
	-5.60595						-1.42558	-4.10554	-3.9563	-3.8896	-5.61605		-3.88	-2.9438	-2.09426	-3.03671	-2.3057		-2.71963	-2.67324	-1.01146	-1.41661	-3.61798
	-4.32391						1.12098	-3.8465	-3.30255	-3.81769	-3.67691		3.36806	-3.34563	-3.64179	-3.06898	-3.88032		-3.04579	-2.17216	-1.85299	-2.53327	-3.43332
	-4.43684						-3.93671	-4.4024	-2.36631	-3.64149	-3.19528		-3.2937	-2.9264	-3.02813	-4.43426	-3.9141		-1.33526	-2.12045	-1.25469	-2.11989	-2.89192
	-6.0412						-3.47509	-4.56881	-3.01631	-3.67183	-3.06625		-5.26887	-2.54574	-3.44088	-2.52123	-4.49787		-3.06606	-1.31329	-2.14902	-2.8396	-2.50153
	1.64109						-3.28101	-2.62653	-2.83709	-3.70701	-5.70019		-4.17088	-2.84819	-4.29078	-5.48799	-5.40427		-1.9896	-3.2013	-2.81417	-2.15081	2.07843
	-5.39802						-2.95662	-4.18219	-2.03108	-5.21455	-5.72208		-3.32988	-4.20983	-2.99059	-2.26963	-4.57309		-1.52827	-2.20283	-2.70409	-1.80128	-1.45458
	-4.5174						-3.22507	-4.48705	-2.96675	-5.26381	-3.72156		-3.03513	-1.38196	-4.0084	-2.78045	-4.20872		-2.49325	-1.19888	-2.12773	-1.95651	-2.395
	1.2141						-3.28512	-4.05175	-1.90927	-5.21995	-2.67987		-4.55719	-4.16384	-4.58931	-3.57497	-3.14634		-2.52639	-2.31473	-1.5788	1.94956	-2.20224
	1.25118						-3.16901	-3.46784	-2.24959	-4.26445	-5.27302		-3.95304	-3.8315	-3.80798	-2.69598	-2.16466		-2.33563	-1.8062	-2.21057	-1.55688	-2.78002
							-3.94833	-3.21219	-4.06541	-4.36832	-4.43405		-2.96311	-5.81347	-5.49181	-3.08928	-5.0303		-1.89665	-1.77971	-2.38635	-1.93459	-2.27354
							-3.76328	-3.99387	-2.79566	-4.77246	-6.47312		-3.98416	-5.69629	-4.77928	-2.86326	-6.22548		-2.19983	-1.5469	-2.34512	-2.30907	-3.166
							-4.08778	-3.2193	-4.5069	-3.88259	-5.93931		-2.62009	-3.21105	-4.62197	-3.12925	2.81447		-2.17605	-0.821477	-2.12067	-2.71796	-1.65927
							-3.4575	-5.31871	-2.54561	-2.59161	-3.37162		-1.95102	-4.53793	-4.15992	-4.19462	-2.85141		-2.99071	-1.31691	-3.24355	-1.67978	-2.43082
							-3.7245	-3.31293	-2.32998	-5.41639	-3.81745		-4.52205	-5.66413	-3.54915	1.61027	-3.49204		-2.36943	-1.81921	-2.01205	-2.61174	-1.59725
							-4.22192	-3.24823	-5.03236	-3.07996	-4.41873		-4.12573	-3.01112	-2.91787	-4.94127	-2.96666		-2.95885	-2.26379	-2.67536	-2.08501	-1.00971
							-4.94515	-2.10712	-5.24667	-2.56962	-5.21702		-4.18417	2.5354	-4.59638	-4.04599	-3.2763		-2.21305	-2.08548	-2.03115	-2.48589	-2.59473
							-3.44503	-3.70985	-2.82587	-3.53873	-5.00196		-1.95798	-4.70281	2.12568	-4.69276	-3.37318		-2.66338	-2.12152	-2.11241	-3.33089	-1.71855
							-4.41411	-4.52208	-3.15609	-4.00922	-5.85948		-3.23824	-3.42477	-4.5062	-2.6032	-3.53473		-1.66019	-1.45904	-1.8618	-3.07822	-1.78967
							-3.05575	-1.72413	-4.25173	-2.25203	-3.57433		-3.22889	-3.70798	-4.39584	-1.90506	-5.09586		-2.71819	-2.25094	-2.3515	-2.30804	-2.07205
							-2.80538	-3.80537	-4.79447	-2.48562	-5.54548		-2.35641	-3.48652	-4.16018	-4.01647	-3.36555		-1.27137	-2.9267	-3.20643	-2.45962	-2.10415
							-4.41577	-1.3631	-2.8192	-3.16701	-4.95077		-3.36229	-2.18881	-3.63098	-3.85949	-5.32583		-1.00869	-1.58966	-2.08179	-1.86963	-2.48195
							-4.35464	-3.41144	-3.79412	-5.08552	-3.88585		-4.56787	-2.37476	-3.74659	-4.26776	-2.9445		-1.86194	-2.27909	-1.94708	-2.4457	-2.31058
							-5.03501	-3.71396	-5.72851	-4.4797	-4.03218		-2.19697	-4.59035	-3.82338	-1.78606	-2.93564		-1.91906	-2.26227	-2.60442	-2.98939	-2.58642
							-3.27393	-4.7609	-3.16668	-5.0696	-4.52928		-3.33436	-1.32573	-4.43252	-4.58458	-3.37856		-1.49798	-2.99681	-1.2852	-2.18522	-2.41475
							-2.27645	-3.78453	-2.93229	-3.56788	-6.42895		-3.5183	-2.46056	-2.68952	-4.72141	-3.21935		-2.44713	-3.05996	-2.54076	-4.0711	-2.37641
							-3.28415	-3.22042	-3.68202	-1.92194	-4.70849		-2.34012	-2.05284	-4.37595	-5.86093	-3.14857		-2.64336	0.809863	-2.32521	-2.49465	-2.85626
							-3.01123	-3.09374	-2.30828	-2.8233	-3.22236		-3.32187	-3.91846	-2.15333	-4.81241	-3.79681		-1.60439	-2.72866	-2.89664	-2.88014	-2.60737
							-3.60127	-2.85514	-5.55436	-4.47362	-4.69722		-3.46425	-3.88794	-3.67315	-4.22416	-3.20307		-1.873	-2.26514	-3.36067	-2.25213	-1.63653
							-1.69342	-5.88983	-3.51424	-2.65991	-2.04126		-4.98016	-2.97759	-4.69241	1.74708	-4.1947		-1.88155	-2.7486	-2.61064	-2.36276	-2.63095
							-3.84435	-2.29677	-2.86897	-4.59099	-2.81454		2.3634	-4.32511	2.77527	-3.79255	-3.33503		-1.24154	-2.86662	-2.28462	-2.43873	-2.70845
							-4.40944	-3.81242	-2.9759	-4.92794	-5.12885		-3.92787	-4.02493	-4.96888	-3.93885	-3.54362		-1.93163	-2.34937	-2.79337	-2.56659	-3.14196
							-3.89584	-4.72146	-1.92371	-3.86606	-5.07558		-1.89843	-4.99188	-4.28876	-3.30048	-4.61468		-3.05946	-2.78277	-4.39774	-3.95104	-2.14461
							-3.48111	-4.20025	-4.29315	-3.0224	-4.52451		2.99706	-2.70953	-3.75914	-4.18603	-2.09826		-2.04371	-2.34973	-2.89772	1.98826	-2.30746
							-6.34075	-3.93852	-4.4292	-3.97004	-4.01324		-2.5581	-3.31503	-3.21561	-2.89699	-5.42073		-2.66318	-2.6573	-1.41769	-1.7794	-2.6074
							-1.98272	-3.09284	-3.47891	-5.62847	-6.30343		-4.1848	-3.66523	-4.87508	-4.37467	-3.33479		-1.22207	-2.3314	-2.07344	-1.71576	-2.68069
							-4.14522	-3.67092	-2.814	-4.33355	-4.67352		-1.99519	-3.48102	-4.60526	-3.66548	-4.78829		-1.72131	-3.18791	-2.1388	-3.40859	-2.14025
							2.89684	-3.71898	-3.5803	-5.24485	-5.6853		-3.83596	-3.69715	-5.09382	-4.26435	-4.12196		-3.49181	-3.37834	-2.21485	-1.65545	-2.17392
							-3.53154	-2.62466	-3.69264	-2.35523	-4.02877		-3.23954	-5.01733	-3.39582	-4.48072	-2.15515		-1.562	-2.65904	-2.09231	-3.46884	-2.69313
							-2.76789	-2.30381	-5.95522	-2.4341	-3.92153		3.06709	-4.69147	-4.09968	-3.87113	-3.06948		-2.4746	-2.68081	-1.69435	-2.09444	-2.09771
							-4.05847	-3.18974	-3.41017	-3.06491	-3.52218		-2.31839	-4.14784	-4.8695	-4.43286	-1.81382		-2.06309	-1.31918	-0.897569	-1.92348	-1.95224
							-4.44065	-4.3462	-4.36349	-4.65305	-4.03104		-3.96722	-3.36424	-3.91655	3.03364	-2.85018		-2.51642	-1.91265	-1.73129	-1.77238	-2.38442
							-5.00138	-3.0754	-2.57319	-4.28618	-5.05892		-4.51149	-2.55152	-2.48006	-3.66844	-3.73224		-2.26805	-1.4458	-2.2741	-2.22083	-2.97425
							-4.66352	-5.34329	-3.82769	-3.75931	-4.90898		-3.28959	1.36735	-4.84095	-2.7442	-4.08666		-2.12622	-1.27268	-1.13952	-2.409	-2.9508
							-2.3402	-3.19447	-3.83254	-2.97208	-3.94569		2.23752	-3.75884	-2.81834	-2.8096	-3.53391		-1.85462	-2.87305	-3.35565	-3.07069	-2.60666
							-2.32092	-4.19032	-3.51653	-2.52752	-5.96053		-3.26759	-4.069	-6.58874	-5.04537	-4.51449		-2.35435	-3.65855	-1.81738	-3.12639	-3.03542
							-2.96758	-2.98308	-2.55304	-5.1572	-4.31342		-4.2173	-3.48646	-3.75044	-1.93444	-2.59843		-1.85176	-2.3547	-1.67838	-2.55767	-2.4145
							-2.62005	-3.12056	-2.80208	-4.5232	-3.29594		-2.92739	-3.27662	-5.52844	-3.28625	-4.9426		-1.40889	-2.87826	-1.56092	-3.21975	-3.70107
							-5.14082	-4.09341	-3.9238	-2.58553	-4.16334		-2.03918	2.26352	-4.24757	-2.53376	-3.61438		-1.75646	-1.86531	-2.33169	-3.84794	-3.25655
							-2.51343	-3.09103	-2.65328	-5.93376	-4.79715		-2.91097	-1.31547	-5.93232	-2.91248	-2.4662		-1.75478	-2.83221	-2.9931	-2.74796	-2.51315
							-4.6472	-2.98726	-3.7465	-3.4413	-4.22457		2.64715	-4.9296	-6.16686	-3.80671	-5.48018		-3.46068	-1.92518	-1.74204	-2.02689	-2.07393
							-4.30625	-1.76598	-4.77571	-6.57299	-5.17006		-3.78574	-3.99708	-3.62465	-2.48476	-6.35089		-1.18982	-1.55892	-2.01448	-2.44641	-2.0046
							-4.5979	-2.92092	-3.31781	-4.00509	-2.73725		-3.92208	-4.61844	-1.90583	-5.35168	-2.8703		-1.66382	-3.29824	-1.17697	-2.23782	-1.93288
							-3.65989	-2.05427	-1.99788	-6.52313	-4.81204		-2.79644	-5.14463	-2.37398	-2.07485	-2.27596		-1.99411	-2.44803	-2.08715	-2.017	-2.34232
							-5.80839	-2.28316	-1.7373	-4.89691	2.47329		-1.77685	-2.24971	-3.14122	-3.4899	-2.8828		2.92224	-2.68859	-0.826748	-3.32344	-2.39692
							-5.6158	-2.98114	-5.3939	-6.00933	-4.36551		-2.58635	-3.63645	-2.66782	-4.85606	-2.39084		-2.14513	-3.19981	-1.5501	-2.98641	-2.09859
							-3.53267	-5.09065	-5.15876	-6.32795	-4.04649		-2.71472	-2.44695	1.10236	-2.33113	-4.17841		-3.40508	-1.84339	-1.40453	-2.25059	-2.38288
							-4.04501	-5.50831	-5.20779	-4.84958	-3.5247		-3.39767	-3.96832	-2.95049	-4.49592	-2.25958		-3.5687	-2.07246	-2.52378	-2.87246	-1.70364
							-3.65074	-3.52441	-3.3104	-5.18804	-3.22956		-3.96213	-3.63188	-4.3536	-2.08731	-5.64878		-2.69826	-1.69148	-2.30242	-2.37315	-2.79889
							-4.47312	-5.19711	-5.1884	-1.60347	-3.30038		-3.11747	-2.79129	-4.14173	-3.84051	-2.16982		-1.39359	-2.15473	-1.93113	-2.2309	3.56417
							-2.96146	-3.18451	-2.71131	-4.19185	-5.85063		-2.71932	-2.93798	-4.41381	-4.91672	-3.22993		-2.48094	-2.7542	-2.30566	-2.4858	-2.12416
							-3.05084	-3.75748	-3.45614	-3.0751	-3.31945		-3.53784	-3.01876	-2.31998	-4.48657	-2.52525		-2.08602	-2.46827	-1.60682	-3.94207	2.2209
							-3.02843	-2.35109	-2.17186	-4.92453	-5.02389		-4.18349	-4.99874	-3.45614	-3.42469	-4.22919		-2.87413	-2.5004	-1.50683	-2.43318	-2.30491
							-3.78074	-3.48324	-3.81775	-3.56211	-3.59953		-1.89264	-3.61367	-3.07786	-4.04687	-2.86661		-2.09422	-2.45792	-2.88706	-1.82009	-1.52146
							1.89933	-4.83071	-2.76047	-4.09817	-3.54333		-2.54969	-3.79131	-3.80287	-4.14292	-5.01815		-2.60026	-3.82959	-1.95474	-1.52031	-2.94245
							-2.37729	-3.34191	-2.60294	-4.82294	-6.0403		-1.61505	-4.59609	-4.49738	-5.43005	-2.86506		-2.46651	-0.799556	-1.69088	-2.91625	-2.13323
							-4.62326	-4.45188	-1.56224	-4.75659	-2.22245		-3.45946	-4.32999	-5.22037	-4.96855	-4.09635		-3.47743	-1.30201	-2.47562	-3.33748	-2.61464
							-3.09663	-2.14701	-3.66094	-6.11438	-3.81247		-2.92666	1.7539	-4.9722	-3.66961	-3.49329		-2.07231	-3.10078	-2.16144	-1.72959	-1.62338
							-2.71678	-3.64819	-3.29767	-4.02736	-3.30267		-2.25497	-2.41995	-5.18254	-5.33789	-7.05252		-2.18967	-2.09726	-2.78456	-2.19399	-3.04863
							-5.15636	-3.90393	-2.6513	-4.08337	1.79803		-3.68041	-3.23219	-3.65992	-3.44316	-5.83743		-2.21279	-1.93801	-1.56517	-1.68494	-2.9834
							-3.77322	-1.31562	-2.63994	-3.37013	-5.00933		1.97723	-1.98223	-4.49684	-4.42732	-2.96612		-2.3452	-1.70537	-3.28022	-3.60095	-1.09301
							-3.62116	-4.16952	-3.40627	-4.71108	-4.52263		-2.48181	-3.06916	-2.97784	-3.37701	-4.73263		-1.79235	-2.83526	-2.63986	-3.51149	-2.19708
							-1.97434	-1.74361	-3.6986	-4.80968	-5.11264		-3.5246	-3.49246	-2.87823	-5.81019	-4.8656		-2.40212	-2.31093	-0.869899	-2.7334	-3.12193
							-3.11014	-2.53635	-3.92435	-5.14499	-4.25087		-2.81646	-3.08373	-2.70485	-5.0136	-3.5108		-2.5176	-3.54708	-2.8513	-1.24953	-3.07236
							-2.38307	-3.52576	-3.17938	-6.61399	-5.02605		-3.28871	1.88458	-2.11744	-3.90654	-5.0267		-1.31004	-1.71719	-2.29345	-2.54707	-2.47532
							-5.59662	-4.86603	-5.60771	-5.61491	-4.62781		-3.06953	-4.81386	-1.82901	-5.1494	-1.82855		-2.74391	-1.06915	-4.60255	-1.54891	-2.4394
							-2.42941	-4.08975	-4.94134	-5.08106	-3.61617		-2.65119	2.44031	-1.10122	-5.50015	-2.48681		-2.68305	-2.93135	-3.3021	-1.52551	-3.22984
							-3.69529	-2.68887	-4.75495	-4.7898	-4.09633		-3.78389	-2.60378	-3.35932	-2.17745	2.95157		-2.60605	-1.59341	-2.39823	-2.02232	-2.82485
							-2.32176	-3.27277	-3.66351	-4.07668	-4.00365		-2.51868	2.54114	1.88605	-2.71696	-3.44711		-2.01594	-2.85796	-2.15063	-2.39637	-3.18177
							-2.97215	-3.53125	-3.07415	-4.42055	-3.65865		-4.90862	-5.02149	-2.25571	-2.14007	-3.26745		-3.57863	-1.66419	-1.52852	-1.45881	-4.15743
							-4.45955	-4.41083	-3.43949	-4.88191	-4.60862		-2.71418	-3.34881	-4.47667	-3.97282	-6.40399		-1.89867	-2.03856	-1.73639	-1.05294	-2.87481
							-3.81192	-3.973	-3.8266	-2.78259	-4.31011		-3.57501	-2.24117	-3.4416	-3.15144	-3.95994		-1.48659	-2.24129	-2.14622	-2.15487	-3.64866
							-3.24884	-5.05164	-5.13963	-2.76299	-3.93136		-3.68183	-4.08169	-4.06317	-4.60656	-4.0358		-2.54493	-2.06394	-0.967004	-1.36073	-3.49599
							-3.29733	-3.76824	-3.95338	-2.86815	-3.13303		-4.91827	-2.73257	-3.83065	-5.5447	-4.72702		-2.11234	-1.40543	-1.89133	-1.35289	-3.11849
							-2.51087	-2.43785	-2.53117	-6.22653	-4.94466		-2.92976	-4.29442	-3.22229	-4.47552	-4.36663		-2.0509	-2.45334	-1.41644	-2.43651	-2.79272
							-2.98533	-2.46943	-5.50032	-4.69292	-2.7787		-2.74358	-2.86259	-1.93535	-2.75582	-3.46438		-2.17403	-1.53195	-2.48904	-2.49195	-2.7021
							-3.27183	-3.94196	-4.42107	-6.48758	-5.499		-3.09496	-3.82931	-4.00277	-5.36305	-2.18573		-2.54231	-1.48499	-2.42631	-1.89786	-2.706
							-4.39446	-2.82781	-5.11255	-4.44688	-3.55291		-2.79297	-2.79944	-4.43131	-5.89628	-5.16288		-1.89153	-2.98828	-1.79223	-1.82165	-3.17978
							-4.26501	-2.58186	-5.63903	-4.82189	-4.93837		-4.6355	1.79526	-4.19732	-3.32514	-1.95184		-2.32104	-2.2275	-1.58604	-1.84199	-3.13385
							-3.30568	-4.84409	-4.82967	-4.97411	-3.63363		-2.60208	-3.28566	-2.93096	-2.75986	-3.70415		-1.90864	-2.36125	-3.41316	-2.52304	-2.64653
							-4.08829	-3.67214	1.48849	-2.55026	-4.15149		-2.13613	-4.58947	2.9617	-3.68949	-5.88984		-3.22504	-2.19059	-2.95845	-2.17081	-2.30534
							-2.81933	-3.22165	-2.70484	-5.41536	-5.38634		-1.22996	-4.6749	-2.99905	-1.392	-4.58033		-2.9477	2.56137	-3.18715	-2.04142	-2.05562
							-3.23453	-4.36053	-3.55423	-3.24272	-4.16648		-3.58099	-5.8375	-4.66318	-4.48805	-2.23112		-3.04435	-1.86508	-3.12625	-1.42177	-2.31524
							-3.69073	-1.81536	-3.3632	-2.57085	-4.61467		-3.89738	-3.38213	-4.46494	-4.06604	-2.4498		-3.11211	-2.16054	-2.40043	-1.53109	-3.18917
							-3.11245	-5.05407	-3.59268	-4.3467	-3.81329		-3.4834	-3.77795	-4.0051	-5.63054	-4.10004		-1.83735	-1.92551	-3.00888	-2.35842	-2.31896
							-1.48304	-2.94635	-3.76021	-2.78301	-3.2085		-2.9078	-4.99963	-2.76681	-4.13847	-4.19556		-1.62053	-3.08854	-2.09013	2.13992	-2.12097
							-4.07189	-5.02097	-2.62788	-2.41691	-2.54281		-2.78686	3.03545	-3.89055	-2.75774	-1.93499		-1.66735	-1.95227	-2.23802	-1.98105	-2.20673
							-3.90218	-4.16614	-3.41808	-3.23015	-3.09597		-3.70543	-2.28519	-3.20092	-5.34708	-3.29877		-2.24863	-1.47341	-2.44516	-2.24547	-1.28927
							-2.8647	-3.29663	-4.65109	-3.79316	-2.89696		-3.60786	-3.17376	-4.88957	-3.74709	-1.90185		-2.74866	-2.50042	-3.04552	-2.24928	-2.809
							-3.36487	-3.75213	1.51944	-5.07101	-3.2539		-3.66969	-3.53317	-2.43648	-4.82663	-2.52357		-2.05056	-1.33253	-1.65354	-2.04411	-2.38741
							-4.49099	-3.62921	-2.2024	-4.57772			-3.08993	-5.02452	-3.78811	-4.95383	-3.72738		-2.39018	-1.99081	-4.02493	-1.8857	-2.02412
							-6.4085	-3.45093	-3.82108	-2.81247			-4.62694	-4.09831	-3.51211	-4.40795	-5.46269		-1.13179	-2.42774	-2.43882	-2.67478	-3.33727
							-4.69778	-4.63784	-2.43797	-2.854			-2.65717	-3.88661	-3.87381	-4.13564	-3.19206		-1.59116	-2.13602	-1.88907	-3.08305	-3.08003
							-5.39886	-5.52895	-3.80721	-4.24678			-2.10048	-5.01276	-4.2548	-3.65627	-6.17863		-1.47295	-2.41653	-2.71904	-3.1131	-2.79079
							-5.24826	-3.86512	-4.38874	-6.7066			-2.72491	-5.98818	-4.13799	-4.11419	-2.54643		-1.82758	-0.938618	-3.00536	-2.54914	-2.60306
							-5.5133	-2.85157	-2.89365	-2.84372			-3.91655	-3.13486	-4.86439	-4.00389	-5.78317		-1.11633	-3.23431	-2.50659	-2.64554	-3.0129
							-5.93661	-2.45902	-4.0777	-5.49957			-2.71334	-4.39317	3.09937	-3.26158	-4.28975		-2.76958	-1.76122	-2.42145	-1.81947	-1.94043
							-3.95876	-4.00689	-4.86996	-2.56772			-3.18002	-4.92779	-5.52277	-2.72513	-2.62962		-2.0335	-2.4428	-2.46823	-1.88582	-1.60165
							-5.27702	-4.12944	-2.88999	-4.33916			3.03187	-3.38375	-3.14031	-2.19157	-3.2452		-1.23681	-2.73058	-1.78082	-1.52964	-3.6624
							-5.02991	-1.75039	-3.32918				-3.88912	-4.2338	-5.66223	-3.01755	-3.06281		-3.27548	-3.08548	-2.34694	-1.7341	-2.46184
							-5.10361	-1.10709	-4.83146				-2.88675	-6.08958	-5.91834	-3.6405	-3.52123		-3.42797	1.80616	-3.33709	-2.91177	-2.23116
							-4.73433	-3.4406	-4.56547				0.964557	-2.29054	-3.48887	-5.5533	-6.31461		-2.52474	-1.99188	-2.76517	-2.20775	-2.01026
							-4.94354	-1.21002	-2.12584				2.54224	-2.30209	-3.16798	-3.46884	-1.56153		-2.66088	-2.58989	-2.31118	-2.06709	-3.19183
							-2.42117	-2.827	-2.90213				-4.02566	-2.86529	-3.96473	-3.2589	-4.18905		-1.09922	-3.22947	-1.57538	-0.791425	-2.51347
							2.143	-4.34495	-3.40464				-1.86796	1.18	-5.30137	-3.46217	-5.12342		0.909579	-2.52887	-3.26598	-2.28477	-2.85619
							-3.7295	-3.75104	-2.80583				-2.90458	-3.93576	-2.65765	-4.91511	-3.14534		-2.77791	5.71957	-2.61506	-1.94346	-2.66897
							-5.55579	-5.33341	-4.27355				-5.35077	-3.78509	-3.19062	-4.90972	-6.96399		-2.19086	-3.06759	-3.97376	-1.4115	-2.34339
							-3.53809	-2.14774	-3.92228				-4.30779	-2.18538	-2.79141	-6.08977	-3.79238		2.50961	-2.27897	-3.11172	-1.8369	-2.11056
							-4.91512	-2.44423	-1.98886				-2.90943	-5.15969	-3.13425	-4.10381	-5.88577		-1.37345	-2.36464	-2.14411	-1.32759	-2.89614
							-2.98047	-5.63297	-1.83911				-2.85588	-4.57491	-5.03948	-4.78504	-4.65999		-0.743928	-3.03366	-2.01735	-1.51437	-3.32598
							-3.62031	-2.47024	-4.05737				-3.31725	-2.64113	-2.40852	-2.07176	-3.07265		-2.00437	-2.6459	-1.47704	-2.45035	-3.9238
							-5.85948	-3.657	-3.81031				-3.22826	-6.1162	-5.40698	-4.24716	-4.60875		-1.22541	-1.3537	-1.93631	-2.327	-4.13185
							-4.14639	-3.12101	-3.9949				-3.14039	1.05715	-4.41165	-2.10522	-2.68647		4.07897	-2.29505	-2.54638	-3.27293	-2.89898
							-5.2463	-4.44341	-2.45825				-2.95766	-4.25664	3.68104	-2.82063	-5.22832		-1.62209	-2.78122	-2.9745	-3.24965	-1.80156
							-4.18749	-3.69115	-4.1735				-5.69525	-4.83331	-5.78745	-3.9442	-3.64439		-2.20638	-3.05452	-2.45125	-2.04962	-2.02193
							-3.79125	-1.94299	-2.28502				-3.2835	-3.08234	-5.92603	-2.88836	-3.73988		1.95529	-1.87503	-1.60796	-3.22399	-2.41489
							-2.77587	-2.74985	-3.46493				-5.10418	-3.34914	-3.25427	-5.90965	-4.33205		-2.38702	-2.31152	-2.64977	-2.70429	-1.17934
							-3.7241	-3.78563	-3.72829				-4.2385	-3.44743	-2.22334	-4.33336	-2.32581		-1.93021	-1.47176	-2.48917	-1.87388	-2.4812
							-4.16395	-3.73051	-4.7929				3.4251	-4.07651	-5.40043	-2.29897	-2.10407		-1.62058	-2.11174	-3.14771	-1.55667	-2.87784
							-4.72043	-2.45674	-1.29416				1.56423	-3.79836	-3.92761	-3.65622	-3.16489		-2.00199	-2.1104	-1.70108	-2.38973	-1.60452
							-4.92943	-2.16568	-3.83502				-4.7641	-3.10808	-3.37905	-2.95908	-4.15383		-2.4061	-2.39511	-1.16364	-2.60676	-1.14952
							-4.51086	-3.13255	-3.38151				-4.27406	-1.57815	-2.06969	-2.8653	-4.86795		-1.62176	-3.35779	-2.77167	-2.29996	-2.31759
							-3.40019	-3.4952	-3.99317				-3.74776	-3.84544	-2.39807	-4.68211	-5.87617		-2.2535	-3.1481	-1.42756	0.95649	-1.37756
							-2.36195	-2.64658	-5.01533				-5.16018	-4.76195	-3.26327	-2.37683	-4.57512		-2.64965	-0.604493	-2.36575	-2.78414	-2.61195
							-3.33873	-2.83578	-4.06173				-3.62881	-3.85268	-2.96388	-2.57594	-2.43388		-2.4934	-0.70624	-2.12669	-2.03348	-1.5528
								-5.17908	-3.17606				-4.34141	-3.88783	-4.68185	-2.57108	-2.88242		-1.12981	-1.86527	-2.21921	-3.02687	-2.57512
								-4.72643	-3.60329				-4.61331	-4.05571	-3.65074	-5.29161	-2.22984		-2.37431	-1.80941	-2.32692	-2.50793	-2.08975
								-4.06719	-6.03467				-1.54902	-3.18939	-3.52388	-2.31005	-4.89833		-2.22555	-1.39579	-1.48224	-2.40556	-3.04871
								-2.11645	-6.29905				-4.39396	2.78609	-2.89531	-3.30957	-4.48722		-2.04008	-0.798167	-2.86342	-2.60657	-2.07736
								-3.41644	-5.73778				-2.75092	-6.88513	-2.53514	-3.47735	-2.55322		-2.35522	-2.19593	-1.84339	-2.10807	-2.8627
								-3.71706	-3.78718				2.01418	-3.11434	-3.20135	-3.93213	-4.38315		-1.80646	-1.402	-2.58313	-2.22842	-2.75867
								-3.33454	-4.44637				-4.18207	-3.27694	-3.15841	-5.06775	-3.34909		-3.6589	-3.52438	-2.69958	-2.9739	-2.57631
								-2.47452	-2.85862				-3.47607	2.31915	-3.55774	-4.05369	-5.92062		-1.94902	-1.3408	-2.44532	-2.24818	-3.25877
								-1.97935	-1.50246				-2.77525	-4.89198	-3.12002	-3.4696	-1.60022		-2.35727	-2.27798	-3.96256	-1.60081	-2.06934
								-4.13989	-4.08994				-3.5189	-3.42516	1.88652	-2.27013	-3.95598		-3.03252	-1.15413	-2.54904	-2.86476	-2.05971
								-4.13461	-2.51366				-2.66347	-4.42229	-1.92902	-2.47213	-3.34226		-3.7809	1.3096	-2.95896	-2.13759	-3.08829
								-4.5412	-4.37371				-3.15647	-3.06751	-3.96558	-4.28328	-4.13339		-2.87455	-1.99005	-1.82603	-2.22177	-3.05863
								-5.44275	-5.74893				-3.9263	-3.91361	-2.84776	-3.1218	-3.77144		-2.27535	-2.18792	-2.51763	-1.82773	-1.87866
								-2.19339	-2.15075				-3.6384	-4.40383	-3.57262	-2.97986	-3.63109		-1.2905	-3.7064	-1.86483	-2.27974	-1.72548
								1.04491	-2.74611				-3.15406	-4.43569	3.205	-4.13128	-4.01557		-2.20769	-3.08856	-3.41436	-3.07385	-1.99142
								2.12743	-2.99596				-4.2231	-3.07395	-2.84227	-4.35173	-3.30755		-1.83704	-3.07266	-2.60385	-2.70785	-2.45214
								-3.70587	-3.59255				-2.00765	-1.80497	-4.69753	-3.26091	-2.45444		-2.91319	-3.08061	-0.750578	-1.9714	-4.30283
								-2.60803	-5.07453				-2.61699	-2.74631	-2.61566	-3.213	-5.79314		-2.12372	-2.47687	-1.47475	-2.5823	-3.21879
								-4.16251	-2.70844				-1.88729	-3.06898	-3.99627	-3.40374	-4.49495		-2.23504	-2.57697	-1.90829	-2.37447	-2.05848
								-3.11628	-2.12277				-3.76634	-2.86594	-3.27657	-4.11005	-3.92017		-2.17751	-2.40674	-3.83533	-2.27725	-2.77258
								1.50041	-2.61084				-3.93756	-2.97005	-3.28796		-6.3176		-2.72404	-1.63909	-1.71933	-1.54526	-2.71621
								-3.6711	-2.67533				-2.4812	-2.39982	-3.4992		3.07363		-2.91497	-2.16281	-2.1658	-2.00651	-2.59108
								-2.45354	-2.45999				-2.94783	-3.40554	-5.45772		-2.85064		-2.18751	-1.65318	-2.84058	-1.25866	-1.82156
								-2.78097	-3.17025				-2.40487	-4.02818	-3.32276		-2.95614		-4.21741	-0.889707	-2.29182	-1.28965	-1.50291
								-2.26933	-2.70483				-4.72702	-3.53811	-4.18788		-5.2545		-1.65452	-3.95163	-1.75282	-2.80851	-2.5162
								-4.28734	-3.10434				-2.05065	-3.17371	3.62598		1.80534		-1.53008	-2.20596	-2.68784	-2.24675	1.89158
								-3.4078	-2.77205				-2.41812	-3.93051	-3.17847		-4.87633		-1.42625	-2.47093	-2.63183	-2.03191	-2.24194
								-4.88934	-3.99508				-2.37779	-2.81889	-3.4386		-3.35693		-1.59856	-2.06676	-2.81274	-1.85725	-3.81732
								-2.87008	-3.26705				-2.63748	1.4506	-4.29809		-3.93992		-3.1012	-1.14035	-0.417325	-2.3057	-2.29572
								-2.21812	-3.37153				-1.69912	-4.67428	-4.81052		-3.74863		0.929815	-1.80663	2.36564	-3.60295	-3.33241
								-2.89975	-2.01161				-4.8336	-3.95656	1.56438		-5.69525		-1.22455	-2.49535	-2.44207	-2.45414	-3.57136
								-2.98457	-3.77769				-4.15615	-3.46641	-5.2603		-2.48195		4.54674	-0.986189	-2.40795	1.83322	-1.87465
								-2.84896	-5.26478				-1.8554	-4.45291	-4.36349		-5.09762		-2.75479	-2.5754	-0.71912	-2.14968	-2.34734
								-3.41757	-3.8122				-4.69583	-4.34112	-4.19393		-3.47164		-3.93403	-2.12815	-1.73616	-1.95419	-2.69198
								-2.27086	-4.14989				-2.91449	-3.71992	-4.50278		-1.8355		-1.56899	-2.30317	-2.84472	-2.48754	-2.44128
								-3.85854	-3.63418				-2.83085	-2.75132	-5.15948		-5.8245		-1.76613	-1.7626	0.790096	-2.47442	-2.95801
								-2.4892	-4.27201				-2.4035	-0.728536	-4.31173		-4.42634		-2.74025	-2.56913	-2.03496	-1.84288	-2.94925
								-2.60176	-3.41346				-3.23054	-4.52365	-5.00542		-5.60077		-1.55449	-2.31235	-1.90215	-2.84832	-2.27947
								-2.59927	-1.75238				-3.24461	-2.54156	-3.69328		-2.46828		-2.8401	-2.49119	-1.75742	-2.25218	-1.89905
								-4.60439	-5.22806				-2.25226	-3.83908	-3.03971		-3.74219		-2.3384	-2.95202	-2.08547	-2.80584	-1.52111
								-5.96786	-3.03565				-3.61858	-5.37338	-2.62758		-5.33144		-2.65014	-1.7176	-1.69487	-1.21192	-1.83715
								-3.26937	-3.75473				-2.91601	-2.39757	-5.15038		-4.74313		-2.37886	-1.80785	-2.31473	-1.59429	-2.33269
								-4.09441	-3.21927				-4.67484	-5.52078	-5.32471		-5.71345		-2.8382	-1.08998	-2.64169	-2.50267	-1.99181
								-2.571	-4.37886				2.86918	-3.19185	-2.27597		-3.07687		-2.88201	-2.97857	-2.43796	-1.97532	-2.49342
								-1.79024	-3.08836				-3.63883	-2.54815	-1.86641		-4.12404		-3.20651	-1.95221	-2.03492	1.46929	-2.53961
								-3.53798	-4.06743				-4.03269	-4.11507	-2.89686		-3.53885		-2.15872	-2.21821	-1.12447	-3.34021	-1.37915
								-4.29117	-4.05335				-3.35106	-3.21187	-5.33144		-3.72596		-2.44505	-1.26828	-2.6887	-1.84512	-2.75168
								-2.26573	-0.970596				-5.1353	-2.4795	-2.18526		-4.83626		-1.51099	-2.55158	-2.04346	-2.33525	-2.52174
								2.76137	-3.58527				-3.04953	-4.63947	-4.59846		-3.11925		-1.61675	-2.18806	-1.88637	-4.34901	-3.13743
								-1.95104	-3.27575				-2.79154	-4.15027	-5.2602		-4.484		-1.69923	-1.86738	-2.27493	-3.05971	-2.36404
								-3.89523	-4.4615				-3.22039	-4.33595	1.90244		-4.43532		-1.45759	-1.93387	-3.43592	-3.2943	-2.41068
								-3.02065	-2.18369				3.24591	-2.44653	-2.90933		-3.75285		-1.86363	-2.11005	-2.74036	-3.74633	1.18446
								-3.02066	-3.25581				-2.91525	-2.95478	-5.15091		-5.87333		-3.13374	-1.45644	-1.92815	-2.8742	-2.61729
								-3.1924	-2.28967				-2.47667	-2.55706	-5.10357		-4.79003		-3.49193	-1.51773	-2.92937	-2.92211	-2.88377
								-2.88859	-3.69024				-3.41857	2.48227	-4.41822		-5.84182		-2.77686	-2.34099	-0.748335	-2.63253	-2.65309
								-3.98993	-2.31382				3.81583	-3.35036	-3.89653		-5.54923		-4.09535	-1.94926	-2.63136	-2.57176	-3.21869
								-3.02956	-5.65836				-3.66955	-5.99463	-3.02055		-3.75058		-2.48227	-2.30651	-2.53471	-2.56959	-2.30059
								-1.58911	-2.67953				-2.63779	-2.34226	-2.10441		-3.88862		-2.9984	-2.36352	-1.89609	-1.38705	2.31416
								-2.98171	-3.1723				-5.65851	-4.6418	-3.0923		-4.15817		-1.8973	-1.42952	-3.23091	-2.46534	4.27233
								-4.00993	-2.53531				-3.80488	-4.24996	-2.72108		-5.38297		-3.39881	-2.74703	-1.51774	-2.66671	-2.71391
								-4.48622	-2.9243				-2.75711	-4.78978	-4.3703		-4.08231		-1.09982	-1.5691	-1.76366	-2.93295	-2.07823
								-4.17497	-4.48749				-3.42805	-3.18903	-2.67125		-5.59366		-2.84557	-2.0502	-2.47017	-1.81669	-2.8891
								-4.11498	-2.00599				-1.79664	-3.77052	-2.61875		-2.97272		-1.79279	-2.17787	-1.3877	-2.16894	-4.09001
								-3.8945	-3.56496				-3.88443	-2.32137	-2.64131		-2.24036		-2.57788	-2.39483	-2.69499	-2.39366	-2.01684
								-5.28218	-4.23317				-5.17971	-2.75612	-4.76695		-4.4401		-1.63247	-2.0308	-1.60709	-2.97094	-2.42369
								-2.56905	-3.81886				-2.6475	-4.0901	-3.37574		-5.67852		-1.4989	-1.69027	-1.18995	-2.34304	-2.85462
								-2.82643	-3.32404				-1.16066	-3.36834	-4.88154		-4.5738		-3.02536	-2.20548	-3.3798	-2.08455	-2.71644
								-2.87947	-3.72539				-1.61056	-2.58426	-4.74988		-5.60227		-1.90029	-2.31237	-2.11573	-2.89924	1.32223
								-2.26933	-3.88522				-4.01713	-3.3468	-1.84368		-4.82643		-2.25552	-1.96584	-1.83821	-2.72346	-1.95851
								-1.46653	-6.72068				-2.67064	-4.02855	-5.24206		-3.89555		-2.70776	-3.23945	-1.76298	-2.46521	-1.7297
								-2.65852	-3.41154				-3.521	-3.17486	-5.35959		-3.74583		-2.99822	-2.43447	-1.86303	-2.14441	-3.29229
								-1.59384	-3.58915				-3.52601	-3.92958	-3.51265		-3.42821		-2.21175	-3.28258	-3.3727	-2.06342	-1.66535
								1.71783	-3.67528				-5.35049	-3.71939	-3.20643		-3.90205		-2.27925	-2.16952	-2.39387	-2.6243	-1.60839
								-4.88348	-3.93109				-4.02444	-6.02804	-3.34484		-4.06954		-3.46122	-2.00154	-2.1755	-3.04848	-2.66662
								-4.72238	-2.14308				-2.86501	-5.84119	-4.2572		-5.41055		-2.23389	-1.54511	-1.43709	-1.03766	-3.45766
								-3.27201	-2.49083				2.84278	-5.23817	-4.53051		-3.07428		-1.32613	-2.48946	-1.89527	1.20161	-3.07252
								-3.43801	-3.36149				-5.15243	-1.66822	-3.34344		-2.85768		-1.9156	-1.49562	-2.61393	-2.05283	-1.86216
								-3.59717	-3.00134				-3.45444	-2.33851	-3.36013		-3.29936		-1.44806	-1.53482	-3.56331	-1.01973	-1.70546
								-3.63153	-3.08699				-4.50303	-3.52936	-3.51749		-2.71851		-1.76928	-1.57181	-1.42629	-3.26552	-2.18125
								-2.58284	-3.9452				-2.70585	-1.98283	-5.50063		-4.17077		-2.45932	-2.75998	-1.82152	-2.02574	-2.53412
								-2.63586	-3.5338				-2.439	-3.32601	-2.34986		-4.16354		-3.70661	-2.34011	-2.26434	-2.73052	-3.14017
								-3.93606	-3.57777				-2.40309	3.2913	-1.8436		-3.19784		-1.49739	-2.56834	-2.24104	-2.4788	-2.31133
								-4.52992	-3.73709				-2.31761	-2.27258	-2.47772		-5.31518		-2.63994	-1.52697	-2.65088	-2.75274	-3.62221
								-3.01084	-4.26975				-3.65677	-2.29335	-4.82842		-4.22552		-1.44821	-1.617	-2.15261	-3.38088	-3.59041
								-2.55595	-3.48706				-3.02147	-4.67675	-4.59828		-3.28796		-2.37319	-1.77845	-2.85856	-2.56592	-2.59494
								-3.26305	-4.38491				-2.93393	-3.4637	-3.83753		-3.34243		-2.95009	-3.56729	-2.3677	-2.69171	-2.77532
								-2.44073	-4.87325				-3.66668	-3.65473	-5.24428		-4.20429		-1.12589	-2.12071	-1.89671	-2.87056	-2.0293
								-4.05236	-4.18246				-2.99114	-3.16173	-3.2861		-4.18033		-2.47307	-1.38957	-1.37357	-3.05243	-3.58153
								-3.8922	-5.88133				-4.12437	-2.75504	-2.96225		-5.97587		-1.5923	-1.7188	-2.61278	-2.82354	-2.44538
								-2.97878	-2.91777				-3.42591	-4.53939	-2.47933		-4.00308		-2.75831	-2.28774	-1.172	-2.82149	-2.77992
								-1.99549	-6.24641				-3.03828	-4.44835	-3.43017		-5.03691		-3.23035	-1.92158	-1.53416	-2.6858	-1.86148
								-2.80743	-5.91617				-4.51596	-4.21099	-3.12621		3.35251		-3.01298	-1.90633	-1.59993	-1.35416	-3.35208
								-4.38951	-4.99501				-3.57521	-3.58661	-2.64263		-4.21281		-3.20322	-2.06067	-1.95269	-2.17918	-3.11617
								-4.11475	-4.64876				-3.97754	-3.57469	-3.04023		-2.4177		-3.27854	-2.07994	-2.40955	-3.1142	-3.1577
								-3.28704	-3.73577				-2.31536	-3.0901	-2.24097		-4.9792		-1.93245	-2.68001	-2.38263	-2.60694	-2.69912
								-2.49731	-3.98672				-3.90689	-4.30077	-3.88391		-2.32329		-2.7043	-1.77964	-2.46395	-1.46823	-3.53698
								-2.64938	-4.02387				-2.59497	-3.74278			-4.07666		-1.77851	-1.80821	-2.34422	-2.30575	-1.74198
								-2.85111	-4.0913				-2.82051	-5.12103			-3.82338		-1.64767	-1.68334	-1.54416	-1.198	-2.25363
								-3.17234	-4.07946				-3.50476	-4.57879			-3.05803		-1.44779	-1.98048	-3.05424	-2.18329	-2.49943
								-3.86177	-4.44822				-2.93406	-3.48002			-3.66361		-3.18778	-1.7929	-3.24024	-2.28041	-2.77872
								-4.47034	-3.50599				-4.40914	-2.01149			-2.94174		-2.98504	-3.41622	-1.81291	-1.68729	-3.42477
								-4.26372	-4.30712				-2.02342	-2.9899			-3.11202		-2.60633	-2.0529	-2.42423	-2.08953	-2.83754
								-1.85531	-3.29264				-2.04672	-3.81148			-3.56789		-2.21975	-2.01433	-2.28262	-1.01912	1.22261
								-3.71321	-2.35564				-2.04038	-3.46537			-2.17621		-2.24844	-1.58971	-1.64634	-2.4233	-1.69361
								-4.76595	-3.22293				-3.83671	-3.45154			-4.27897		-2.65484	-2.4489	-2.38753	-1.38131	1.79623
								-5.19811	-2.60373					-2.66426			-2.87892		-1.74183	-2.59831	-1.18545	-3.56269	-3.87511
								-4.24177	-4.37041					-4.74357			-4.64899		-2.76049	-2.57956	-2.22505	-3.29645	-2.65031
								-2.42016	-3.80937					-3.45475			-4.33184		-2.02483	-1.63652	-3.30673	-2.6876	-2.87022
								-3.37834	-2.29163					-5.69224			-1.85323		-2.41582	-3.06352	-2.18544	-2.74256	-3.78147
								-3.78187	-3.74119					-6.05549			-4.19601		-3.17301	-3.9055	-2.38505	-1.48556	-3.59606
								-2.41174	-3.22937					2.18176			-3.66055		-1.99804	-1.89135	-2.52925	-2.18633	-1.66741
								-3.33654	-4.25043					-4.01047			-3.54047		-2.66234	-2.44364	-2.22374	-1.81044	-1.6537
								-4.26232	-3.12271					-4.32232			-6.05461		-1.01268	-2.98063	-2.37519	-1.31135	-3.24213
								-3.43152	-2.97699					-4.08833			-5.07625		-2.15705	-2.6988	-2.47063	-2.0483	-1.67736
								-3.56632	-3.40486					-1.84626			-4.60638		-3.02236	-2.29669	-2.80304	-1.68043	-2.19688
								-3.23055	-4.81742					-3.51002			-4.35768		-3.02492	-2.54721	-2.01486	-1.67948	-2.75154
								-3.49684	-4.72194					-4.38684			-3.64947		-2.91325	-0.976395	-2.567	-1.91823	-3.96578
								-3.95912	-3.85948					-4.17556			-4.18223		-1.73478	-3.67011	-2.64124	-1.76188	-2.03956
								-2.48462	-3.42861					-3.28761			-3.17727		-2.65065	-2.55567	-2.69877	-1.8328	-3.20299
								-4.38963	-2.93944					-2.74425			-3.04265		-2.01993	-2.55645	-4.58636	-2.39601	-2.08384
								-3.50872	-1.67933					-4.57288			-2.16753		-3.28739	-2.53381	-2.15263	-2.60066	-2.27308
								-3.28984	-2.96271					-3.02406			-4.77616		-2.33692	-2.46218	-1.41704	-3.31191	-1.06202
								-2.61261	-3.59655					-3.47446			-2.68496		-3.02361	-1.64316	-2.45698	-1.84548	-2.91325
								-2.8853	-4.85413					-5.50492			-3.0582		-2.00323	-2.05442	-2.87966	-2.30255	-2.31296
								-2.23608	-4.47156					-3.19106			-3.85738		-1.99542	-2.90383	-2.11908	-3.28443	-2.93507
								-1.26601	-4.42271					-2.87333			-3.23054		-2.86871	-3.05756	-3.57173	-2.97471	-3.36856
								-4.10554	-4.86063					-3.33541			-4.01301			-2.45533	-2.17359	-1.92107	-3.06002
								-4.28171	-5.18909					-4.87052			-2.69682			-1.88991	-2.48287	-2.58995	-2.7164
								-4.28237	-4.37243					-4.4793			-4.11007			-2.57224	-3.05555	-2.71652	-2.09414
								-2.10819	-4.52476					-3.95106			-3.80874			-1.80106	-1.29262	-3.01029	-1.99521
								-4.33052	-3.95919					-5.52942						-1.49276	-2.28327	-1.76405	-2.1776
								-2.27406	-3.42858					-4.87153						-2.08102	-3.47301	-2.53349	-1.98665
								-3.39572	-3.33692					-3.60373						-2.44042	1.9977	-1.78879	-2.13045
								-2.24581	-3.73618					-3.32595						-1.67555	-2.43312	-2.77541	-2.63132
								-3.76056	-3.68782					-5.17385						-2.27877	-1.29179	-2.04857	-1.57433
								-3.05514	-3.17274					-1.59616						-3.10846	-1.12526	-2.13861	-0.610617
								-3.47487	-3.96052					-4.48648						-3.90732	-2.27159	-1.89476	-2.4332
								-3.69265	-3.33937					-5.75988						-3.52879	-2.58553	-1.67114	-3.24269
								-4.5081	-1.80845					-4.86526						-1.30615	-1.68254	-1.59754	-2.65169
								-4.06701	-2.25683					-4.84237						-1.69081	-2.09626	-2.79991	-1.87668
								-4.06439	-4.65816					-3.12358						-1.78588	-1.82609	-2.06386	-2.7388
								-3.79767	-1.91671					-3.7095						-2.51358	-2.49865	-2.71232	5.92627
								-3.73534	-3.81281					-4.81406						-2.39427	-2.55357	-2.29563	-2.5341
								-3.71799						-4.01584						-1.57141	-1.16977	-2.38556	-3.42634
								-3.18196						-2.8954						-2.23716	-2.61263	-3.59428	-2.30099
								-4.51788						2.96907						-2.67058	-0.869692	-3.2229	-2.36416
								-4.70909						-3.40094						-3.31509	-2.5386	-2.19787	-1.72123
								-2.8377						-2.96695						-2.31774	-1.43927	-3.01585	-3.17663
								-4.70434						1.9056						-0.723018	-1.78515	-2.7457	-1.80317
								-2.98155						-2.46271						-1.98011	-2.89168	-1.74156	-3.34493
								-3.5611						-3.96278						-2.43566	-2.43781	-2.3836	-2.74086
								-4.15108						-4.3676						-3.47629	-1.88709	-2.7897	-3.67831
								-3.54477						-3.09011						-0.890361	-1.65428	-3.05659	-1.70991
								-3.31524						-2.5127						-1.17345	-2.37373	-3.91837	-2.55819
								-3.17872						-2.82964						-1.99966	-2.85942	-2.83614	-2.17428
								-1.7554						-2.80359						-2.19894	-2.24067	-2.03712	-1.9186
								-3.22889												-3.28894	-1.18133	-3.63662	-1.91445
								-3.26388												-2.3405	-3.19788	-1.88746	-3.22536
								-2.35184												-1.78902	-1.8489	-3.25807	-3.59368
								-2.84928												-2.145	-2.56346	-1.82485	-3.07603
								-2.82653												-2.78432	-2.68331	-2.58105	-1.94883
								-4.46332												-1.88782	-1.12483	-3.38488	-2.69452
								-5.04069												-1.55537	-1.74825	-2.35044	-1.2524
								-4.53555												-2.28711	-2.2732	-3.08866	-1.99553
								-3.98833												-2.37421	-1.30406	-2.61924	-2.46109
								-2.70443												-1.92977	-2.68692	-1.79608	-3.60012
								-2.19189												-2.14793	-1.47255	-1.18011	-2.52829
								-2.90912												-1.62489	-2.12835	-3.63173	-2.84279
								-3.66851												-2.79406	-2.3916	-1.40752	-2.18187
								-2.7369												-2.32133	-2.16594	-2.54908	-1.70184
								-1.89708												-3.87687	-3.06577	-1.189	-1.11996
								-2.79377												-2.84152	-2.68969	-1.98856	-2.38941
								-3.46694												-2.55151	-1.91235	-1.85702	-2.8205
																				-1.32258	-1.34726	-2.52183	-1.70019
																				-1.08387	-3.38702	-2.28144	-2.58372
																				-2.02313	-1.37259	-3.62082	-2.02709
																				-2.73544	-2.03055	5.43194	-2.84837
																				-1.38112	-2.85613	-2.45289	-2.37612
																				-2.36468	-2.32113	-1.62826	-0.803586
																				-2.09491	-1.80272	-2.4755	-2.5928
																				-1.99754	-1.93851	-1.8201	-1.57952
																				-2.08756	-2.06647	-2.37492	-2.97607
																				-2.55469	-2.67147	-2.46974	-2.59208
																				-2.65402	-2.06366	-2.61025	-2.79355
																				-3.44012	-1.84982	-1.46429	1.95687
																				-2.2598	-2.35397	-2.61836	-2.87149
																				-2.76627	-2.6819	-2.25114	-2.7964
																				-3.21947	-1.94651	-2.31758	-2.45336
																				-1.85672	-2.86702	-1.1855	-2.19753
																				-2.76656	-1.87597	-1.31262	-2.97725
																				-1.52098	-1.70272	-0.952773	-2.73624
																				-2.43624	-1.72899	-1.56886	-3.11625
																				-2.94853	-1.96011	-2.44932	-1.72188
																				-1.51605	-2.24297	-1.23116	-1.3733
																				-2.43313	-3.10393	-2.25895	-2.92489
																				-1.22226	-2.09308	-1.8887	-2.5435
																				-2.05419	-1.71611	-1.82891	-2.63022
																				-3.38174	-2.88189	1.58481	-2.28861
																				-2.18674	-2.86601	2.66111	-2.34093
																				-3.81194	-2.03254	-2.17887	-3.42375
																				-2.26755	-2.66652	-2.60649	-3.85422
																				-2.28588	-1.40153	-1.03246	-2.96399
																				-3.12954	-3.72994	-2.52042	-2.2468
																				-1.47772	-1.36342	-1.52486	-3.0548
																				-2.7567	-1.76541	-1.27596	-2.29039
																				-1.46343	-2.58475	-1.59409	-2.09108
																				-3.13312	-2.19765	-2.71655	-2.7354
																				-2.685	-4.31182	-2.2028	-3.56683
																				-2.83184	-2.41499	-1.69638	-2.13851
																				-1.55254	-2.07324	-2.92336	-1.83463
																				-2.25114	3.70339	-2.89638	-1.99525
																				-2.55679	-2.07385	-2.14447	-2.36511
																				-3.08925	-1.61352	-2.76111	-2.10291
																				1.45245	1.16627	-1.69174	-1.90022
																				-2.61251	-2.37884	-1.27036	-2.49942
																				-1.81278	-1.61177	-2.98465	-3.01955
																				-3.88489	-1.83387	-1.66965	-1.83359
																				-2.25381	-2.22482	-2.30346	-1.95861
																				-2.89938	-2.20199	-1.75456	-1.80333
																				-1.07535	-2.28563	-1.99809	-2.39
																				-2.41361	-3.79041	-5.0318	3.32268
																				-2.92466	-1.9938	-2.43615	-1.74946
																				-3.05982	-2.63404	-1.91612	-1.42193
																				-2.54814	-3.23187	-3.10805	-2.4704
																				-1.39061	-2.34919	-2.25899	-2.43947
																				2.2983	-2.48758	-2.91459	-2.00945
																				-2.42872	-2.1157	-2.80181	-1.74613
																				-2.58458	-3.77458	-2.35725	-2.19775
																				-2.5548	-1.1538	-2.114	-3.17976
																				-1.75041	-1.93505	-1.22269	-2.61691
																				-1.51731	-2.58833	-2.10583	-2.28982
																				-1.57892	-0.535655	-3.25979	-2.39991
																				-3.14169	-2.65818	-1.5269	-1.37282
																				-1.67346	2.65101	0.882151	-1.60932
																				-2.6269	-2.39451	-2.82119	-4.96284
																				-2.67885	-2.08852	-2.51855	-1.94678
																				-2.30887	-2.9615	-2.69321	-1.58456
																				-2.82997	-3.45084	-2.66541	-2.81498
																				-2.04342	-2.72534	-2.89461	-1.6377
																				-3.23031	-2.28454	-2.65158	-1.69687
																				-2.36215	-2.13929	-1.54622	-3.5122
																				-1.6357	-3.14964	-2.38119	-2.66175
																				-1.97633	-2.16925	-3.71327	-2.95835
																				1.36674	-3.0963	-1.297	-1.96136
																				-2.27703	-2.78628	-3.15055	-3.10258
																				-1.20968	-1.98553	-2.25948	-2.97094
																				-2.00833	-2.25678	-2.38387	-2.96677
																				-2.20284	-1.73059	-2.65699	-2.9452
																				-2.94669	-2.12988	-2.66937	-3.67105
																				-2.74574	-2.49714	-2.61025	-0.734994
																				-2.48109	-2.07609	-2.93548	-1.87288
																				-2.4987	-2.83243	-1.9628	-2.32095
																				-2.51377	-1.87632	-2.22198	1.8081
																				3.08469	-2.46114	-1.19791	-3.9214
																				2.75938	-1.47435	-2.80365	-3.1959
																				-1.93399	-1.70336	-1.06303	-2.42707
																				-1.62974	-2.28512	-2.23255	-1.16274
																				-2.32252	-2.95961	-2.32587	-1.7986
																				-0.503174	-1.12701	-1.94025	-2.7447
																				-1.84182	-1.65999	-2.2953	-2.47386
																				-1.7571	-2.52462	-1.37015	-2.73055
																				-2.29402	-1.91292	-3.07861	-1.40307
																				-1.90486	-3.21414	-1.99211	-2.45755
																				-2.53964	-2.95549	-2.01823	-1.58519
																				-2.98851	-2.22332	-2.89568	-2.43536
																				-1.21145	-2.42485	-2.20376	-2.95365
																				1.71316	-2.80672	-1.86455	-2.96317
																				-2.61172	-2.20869	-3.03421	-2.54999
																				-2.78731	-2.91758	-2.04564	-2.45173
																				-2.6848	-3.16848	-1.59505	-2.58474
																				-1.87134	-3.1476	-1.57839	-2.39885
																				-1.96933	-2.96947	-2.03159	-3.02911
																				-2.23144	-1.93561	-1.98686	-3.20026
																				-1.9583	-1.39351	-2.80074	-2.55555
																				-2.31009	-1.7004	-1.022	-2.33744
																				-1.26084	-2.16454	-2.41391	-1.88517
																				-2.9987	-2.82955	-0.847039	-2.17727
																				-2.09078	-3.59502	-1.79356	-3.26626
																				-2.06364	-1.60243	-2.26393	-2.70505
																				-2.85515	-1.96568	-1.33147	1.95053
																				-1.25463	-1.49764	-2.07414	-3.53601
																				-3.36683	-2.4047	-3.52758	-2.27377
																				-3.21912	-2.79219	-2.6912	-2.82835
																				-2.4074	-2.02113	-0.792003	-2.56005
																				-2.04047	-1.57435	-3.36949	-0.658914
																				-1.37656	-2.82904	-3.143	-4.28847
																				-1.60683	-2.80567	-3.22696	-2.31078
																				-1.7228	-1.91612	-3.02678	-3.63692
																				-1.47512	-2.61724	-2.97774	-3.31309
																				-1.72981	-1.86891	-3.39162	-2.0926
																				-1.7838	-2.52779	2.09159	-3.38985
																				-2.58823	-2.76793	-2.7374	-4.1531
																				-1.70907	-2.69331	-1.67763	-2.98375
																				-3.03884	3.21632	0.852397	-2.93645
																				-2.35133	-2.32961	-2.9574	-3.03271
																				-2.02983	-1.03505	-1.91919	-2.9298
																				-3.44297	-2.55943	-1.99561	-1.95247
																				-2.02356	-2.58717	-3.31914	-1.96951
																				-1.84923	-2.06868	-3.11401	-2.3101
																				-1.78724	-2.54178	-2.16513	-1.46543
																				-1.7339	-2.59688	-1.03363	-1.43581
																				-1.40523	-2.32123	-0.93701	-2.63488
																				-3.6218	-2.88574	-1.76429	-1.01932
																				-1.9819	-1.35595	-3.38218	-4.13336
																				-2.52302	-1.76198	-2.13051	-2.72324
																				-2.14884	-2.12976	-1.41264	-2.38786
																				-2.45257	-1.1461	-3.84467	-2.70322
																				-2.55688	-2.2265	-2.45796	-2.03734
																				-3.03468	-2.17233	1.62436	-2.44564
																				-1.67193	-2.48375	-2.24096	-3.00397
																				-2.43196	-1.83084	-2.17495	-2.02631
																				-1.97074	-2.77454	-2.11002	-2.20995
																				-1.79001	-1.59998	-3.3883	-2.06835
																				-1.67611	-1.91937	-2.7197	-2.15137
																				-2.41191	-3.40632	-3.02204	-2.67444
																				-1.70292	-1.30832	-3.67326	-2.15891
																				-2.39597	-2.15155	-3.15032	-3.77913
																				-3.06638	-2.35892	-1.96468	-1.38053
																				-3.25511	5.41793	-2.50219	-1.98095
																				-2.26583	-2.34836	-2.09447	-1.98715
																				-2.39149	-2.699	-2.46263	-1.57059
																				-2.77932	-2.1729	-1.58392	-1.04509
																				-2.66921	-0.987985	-2.97627	-1.90127
																				-2.53278	-2.06987	-2.10496	-2.30079
																				-2.84183	-2.83468	-2.19846	-2.67423
																				-1.35726	-2.35255	-2.23106	-2.32365
																				-2.45535	-1.47368	-3.5654	-2.60105
																				-2.77695	-2.8136	-2.36808	-1.98475
																				-1.62431	-3.16183	-2.68206	-3.87501
																				-2.54292	-2.10415	-1.96552	-2.37002
																				-1.21758	-1.36156	-2.83096	-3.40366
																				-1.76291	-3.84082	-2.81091	-2.52991
																				-2.27152	-1.92377	-2.24401	-2.89009
																				-2.27811	-2.28526	-2.72271	1.15182
																				1.32536	-1.01402	-3.4231	-2.37145
																				-2.40678	-2.33212	-2.169	-2.17409
																				-1.76395	2.04604	-2.72968	-1.70954
																				-1.99579	-1.96085	-3.018	-2.04316
																				-0.86084	-3.22048	-1.67943	-2.5764
																				-1.85809	-3.26168	-2.49841	-2.01436
																				-2.93433	-1.84284	-1.88595	-2.17605
																				-1.40137	-1.47122	-1.86611	-2.15221
																				-0.936566	-2.27968	-1.86378	-1.34816
																				-1.85884	-2.10279	-3.99264	-1.15778
																				-3.0462	-1.43149	-2.12343	-2.32321
																				-1.93034	-2.53072	-1.70614	-1.99619
																				-1.79137	-2.60027	-2.18237	-1.98275
																				-2.01666	-2.44477	-2.34968	-1.58065
																				-1.86061	-2.74523	-2.45098	-2.76246
																				-2.11617	-2.5168	-2.04279	-3.81677
																				1.80214	-1.59619	-1.93128	-2.05342
																				-1.21385	-2.73053	-2.4077	-2.17752
																				-1.18322	-2.35575	-1.88796	-1.85971
																				-2.86045	-3.0524	-1.79997	-1.90075
																				-1.67968	-3.62557	-4.22635	-2.03894
																				-2.66985	-1.8445	-2.02146	-3.49281
																				-2.35569	-1.89707	-2.35473	-2.325
																				-4.02715	-2.21003	-2.68237	-2.8346
																				-2.65843	-2.99721	-1.2916	-2.48568
																				-2.30529	-3.41909	-2.66699	-2.49787
																				-1.69801	-2.34576	-2.55105	-2.44707
																				1.79188	-2.41429	-2.21082	-2.42774
																				-0.780679	-1.60506	-2.5594	1.58021
																				-3.57201	-1.80192	-2.142	3.09819
																				-3.11329	-2.19384	-2.71774	-1.85071
																				-0.557094	-2.54006	-1.79415	2.6637
																				-1.54257	-1.79017	-3.25247	-2.48307
																				-1.79634	-1.38349	-3.1567	-1.24634
																				2.26731	-2.25387	-2.27532	-2.01934
																				3.5801	-2.9644	-2.89845	-1.33898
																				-2.64203	-2.44404	-2.4869	-3.1481
																				-2.48639	-3.80984	-2.01971	-2.69913
																				-1.69533	-2.73231	-2.08901	-2.88286
																				-2.04034	-2.97449	-2.06628	-4.0317
																				-1.62318	-1.02608	-1.75645	-2.69784
																				-2.72343	-2.24795	-2.79988	-3.90383
																				-1.93789	-3.02035	-2.73778	-3.4074
																				-1.65747	-2.68503	-2.17162	-2.72144
																				-1.84835	-2.76425	-2.28502	-2.52684
																				-3.79631	-1.96068	-2.37777	-1.87066
																				-2.27599	-1.59937	-4.51753	-1.81862
																				-2.43216	-1.25066	-2.70153	-2.8069
																				-1.86261	-2.08699	-2.4018	-2.49656
																				-3.99385	-1.68072	-2.5682	-2.68308
																				-1.36608	-2.23509	-1.95521	-2.94825
																				-2.18442	-1.4606	-1.90566	-1.48053
																				-1.77834	-1.76758	-2.33782	-2.85736
																				-2.33377	-2.1355	-1.70733	-3.61418
																				-2.85293	-1.4328	-2.94158	-2.86299
																				-2.16784	-2.67584	-2.60407	-2.9995
																				-2.15338	-3.27852	-3.51533	-4.08491
																				-1.78506	-2.04399	-2.90866	-1.69308
																				-2.17146	-2.41172	-2.62317	-3.00373
																				-2.73271	-2.99412	-2.05479	-2.77133
																				-3.06544	-2.55547	-1.68308	-2.43955
																				-2.26684	-2.73841	-3.42801	-1.89953
																				-2.42599	-2.95311	-3.01178	-1.43037
																				-1.64281	1.77045	-2.49221	-2.74135
																				-1.77541	2.36223	-2.65534	-2.01804
																				-2.1174	-1.93403	-2.66238	-2.70255
																				-2.59373	-2.66479	-1.61689	-2.11011
																				-2.42186	-3.01987	-2.07666	-2.25544
																				-2.54276	6.12031	-1.77688	-4.22454
																				-1.58207	-2.88562	-2.00349	-3.01117
																				-2.46567	-2.76848	-2.48347	-3.03346
																				-0.804435	1.57533	-2.87239	-2.20835
																				-2.4724	-2.19679	-1.73312	-2.39019
																				-1.28799	1.19634	-2.4915	-2.73782
																				-2.2196	-1.83057	-2.20278	-2.02
																				-1.75089	-4.13734	-2.50254	-2.47157
																				-2.09275	-2.14676	-2.61856	-2.51081
																				-2.09059	-1.78536	-2.51617	-1.50699
																				-2.78361	-3.31922	-2.70173	-2.25431
																				-3.59344	-2.59979	-2.51182	-1.4827
																				-1.64386	-2.05886	-2.34802	-2.41426
																				-1.87736	-2.41389	-2.56832	-2.83942
																				-2.09604	-3.24259	-1.82314	-2.82572
																				-1.84255	-2.03692	-2.77132	-1.48952
																				0.721405	-1.73289	-1.56508	-2.57338
																				-1.47773	-2.36868	-1.76349	-1.77364
																				-1.28326	-1.25185	-2.01822	-2.40928
																				-2.43957	-2.97525	-1.38821	-1.76376
																				-1.70552	-1.01026	-2.70445	-2.91284
																				-2.71502	-2.07551	-1.25019	-3.43169
																				-3.03608	-2.33519	-2.36411	-3.04976
																				-1.94354	-2.1912	-3.59048	-1.94108
																				-1.51619	-2.88216	-3.77743	-1.70403
																				-1.86513	-0.683945	-2.37023	-2.9559
																				-4.16756	-2.55197	-1.20183	-2.20344
																				-1.70733	-1.15839	-2.0531	-3.01033
																				-1.51887	-2.29063	-2.40272	-1.95122
																				-1.95261	-1.67174	-2.2595	-2.94124
																				-2.22416	-1.94051	1.61262	-2.05454
																				-2.5942	-1.83176	-2.57309	-2.78547
																				-1.80151	-2.37777	-2.36389	-2.62687
																				-2.0569	-2.32566	-2.56322	-3.24766
																				-2.71021	-2.7865	-3.26149	-2.28365
																				-2.07709	-1.63757	-1.91192	-2.49803
																				-2.72531	-1.95462	-2.42149	-2.82224
																				-2.46044	-2.03532	-2.50998	-2.40813
																				-1.28878	-1.35822	-2.01367	-2.53664
																				-2.37237	-2.41519	-2.14777	-2.79521
																				-2.83742	-1.63554	-1.74858	-2.76415
																				-2.02664	-1.48814	-2.37359	-2.78892
																				-2.16585	-3.02654	-2.36887	-2.39503
																				-1.38241	-2.96737	-2.37198	-2.54416
																				-1.67032	-2.67496	-1.38393	-4.19002
																				-2.17932	3.27701	-2.74413	-2.95694
																				-2.04885	-2.51751	-3.02153	-3.11383
																				-2.19952	-1.15783	-2.87133	-2.92066
																				-2.75421	-1.49461		-1.28331
																				-2.10416	-2.39623		-2.69739
																				-2.01142	-3.01331		-1.74251
																				-1.89494	-1.48242		-2.40279
																				-2.03046	-2.32316		-1.68685
																				-2.24351	-2.2551		-3.23371
																				-2.57368	-1.82103		-2.22977
																				-2.46748	-1.94731		-2.92178
																				-2.41469	-2.22949		-2.34701
																				-1.84683	-1.32369		-3.24684
																				-1.90497	-2.61195		-3.55073
																				-1.86613	-2.60013		-3.28457
																				4.97493	-2.07895		-1.4337
																				-2.97058	-0.853785		-2.27594
																				-1.4022	-2.61224		-1.90066
																				-2.39078	-1.72327		-3.37136
																				-2.5181	-2.97808		-1.57379
																				-1.29704	-3.16831		-2.32591
																				-2.42834	-1.25127		-2.32943
																				-4.0415	-1.38624		-1.4201
																				-3.20572	-2.3459		-2.50869
																				-2.58176	-3.13901		-2.31389
																				-2.37668	-2.25151		-3.23444
																				-2.2444	-2.70997		-2.11938
																				-1.70053	-2.29057		-3.89285
																				-2.69462	-2.52669		-2.48431
																				-2.22871	-1.82105		-2.23761
																				-2.04273	-1.77603		-2.83671
																				-2.78563	-0.852696		-1.32581
																				-1.50515	-2.8383		-3.03958
																				-1.28893	-2.77468		-1.75373
																				-2.15638	-3.04777		-2.76385
																				-2.83786	-1.95247		-2.83087
																				-2.00085	-3.07196		-3.15204
																				-0.929372	-1.91115		-2.72371
																				-2.26414	-3.30609		-3.28376
																				-2.46342	-1.71833		-2.51568
																				-2.33318	-4.36459		-1.5574
																				-1.85063	-0.965636		-1.40996
																				-2.41458	-1.35517		-3.92646
																				-1.30349	-2.68276		-1.59985
																				-1.75336	-4.32632		-3.44997
																				-2.09271	-2.62045		-2.13287
																				-2.1932	-0.741414		-2.54758
																				-0.706271	-4.30234		-1.64142
																				-2.54282	-1.66747		-2.26673
																				-0.737297	-3.2529		-2.39512
																				-2.06253	-1.83473		-1.88612
																				-2.0822	-2.02739		-2.35887
																				-1.88504	-3.22862		-2.63307
																				-2.33238	-1.81679		-2.3024
																				-3.73395	-1.91172		-3.26121
																				-2.27171	-2.72966		-2.65666
																				-2.60357	-1.13766		-2.53962
																				-1.58974	1.09757		-2.79957
																				-1.11715	-2.10906		-1.99938
																				-2.26775	-1.38408
																				-2.72435	-2.72012
																				-3.78874	-3.14993
																				-3.38626	-2.45739
																				-2.51379	-2.34528
																				-2.97517	0.741193
																				-1.892	-2.14524
																				-2.00801	-1.5099
																				-3.16569	-3.21305
																				-1.46932	-3.4827
																				-2.07827	-2.40505
																				-3.22098	-3.0435
																				-2.07966	-1.63287
																				-3.05221	-1.78948
																				-1.511	-2.50674
																				-2.17165	-1.21714
																				-2.6514	-1.4554
																				-2.40384	-2.15627
																				-3.10531	-2.09585
																				-2.33772	-2.29648
																				-2.84941	-2.93782
																				-2.87299	-1.84976
																				-1.9042	-2.39674
																				-2.51337	-1.34595
																				-2.26636	-2.10076
																				-2.11786	-0.871502
																				-1.89946	-0.904237
																				-2.50966	-2.41444
																				-1.81	-2.31973
																				-2.62274	-1.91776
																				-2.39747	-2.00848
																				-3.49563	-1.78831
																				-1.92734	-2.34163
																				-2.33687	-1.92528
																				-2.14166	-2.5186
																				-2.6933	-2.44391
																				-1.73034	-2.963
																				-1.4569	-2.18372
																				-1.58943	-2.03155
																				-2.63112	-1.72559
																				-2.38587	-3.3231
																				-1.76431	-2.70108
																				-1.13822	-1.54677
																				-2.14963	-1.71611
																				-2.87896	-3.30641
																				-1.93593	-2.42766
																				-2.15207	-2.69299
																				-1.85959	-2.29475
																				-1.8581	-1.61549
																				-0.619611	-3.67798
																				-2.25914	-1.55881
																				-2.28111	-2.12168
																				-1.71895	-1.4442
																				-1.33448	-2.14529
																				-3.05675	-2.19553
																				-3.11441	-2.41059
																				-2.15083	-2.8866
																				-2.33685	-3.35271
																				-2.25275	-2.35956
																				-1.87495	-1.52467
																				-2.682	-1.455
																				-1.17909	-1.50837
																				-1.80416	-2.182
																				-2.42999	-1.73501
																				-2.66704	-2.19616
																				-2.63747	-2.44495
																				-3.10107	-1.70629
																				-1.93546	-2.12782
																				-1.39361	-2.14408
																				-3.0568	-1.40159
																				-3.53866	-2.74357
																				-3.04698	-1.98305
																				-1.42442	-1.98099
																				-2.31062	-1.48654
																				-2.40544	-1.37186
																				-1.39911	-2.90356
																				-2.48177	-1.8378
																				-2.54574	-2.04202
																				-1.23671	-1.10355
																				-1.77402	-2.47359
																				-0.933948	-2.57974
																				-2.4928	-1.35973
																				-2.39863	-1.04935
																				-4.40521	1.02325
																				-2.50028	-2.34215
																				-2.71005	-1.64885
																				-2.21182	-2.28073
																				-2.30807	-2.44171
																				-2.72843	-3.53061
																				-2.13232	-4.22642
																				-2.46191	-3.05637
																				-1.96853	-2.34222
																				-1.71888	-3.77207
																				-1.58966	-0.853269
																				-2.26972	-2.63808
																				-1.76606	-2.45757
																				-1.86713	-2.94641
																				-1.09322	-2.93475
																				-2.45546	-3.4613
																				-2.41308	-1.52965
																				-2.87879	-1.50164
																				-1.81388	-2.52302
																				-2.32368	-3.07433
																				-2.09787	-2.36269
																				-1.11703	-2.29271
																				-2.26717	-3.11361
																				-1.66414	-2.90412
																				-2.81928	-1.96096
																				-2.21615	-2.00984
																				-2.4045	-1.74887
																				-1.86312	-3.17966
																				-1.78918	-1.19027
																				-1.4587	-1.9663
																				-2.18686	-1.98036
																				-2.12014	-3.31298
																				-1.46243	-2.70904
																				-1.96518	-0.767395
																				-2.13817	-1.08173
																				-1.49879	-3.9154
																				-2.37739	-2.39776
																				-2.32941	-2.26022
																				-1.73527	-1.95991
																				-1.32892	-1.80706
																				-2.57206	-1.47686
																				-3.09919	-2.40378
																				-1.70928	-2.48237
																				-2.5771	-1.15688
																				-3.02937	-2.52227
																				-2.1376	-1.5834
																				-2.33778	-1.60295
																				-1.11368	-0.979531
																				-2.17284	-2.16326
																				-4.40056	-3.67753
																				-3.08716	-1.52783
																				-1.20534	-2.93931
																				-0.854811	-1.34525
																				-2.10627	-3.35639
																				-2.35914	-3.01826
																				-1.31729	-2.49926
																				-0.840673	-1.18576
																				-4.00462	-2.82507
																				-2.62472	-2.36758
																				-3.2624	2.78862
																				-1.68261	-1.36072
																				-2.38383	-2.4969
																				-2.45875	-1.17473
																				-2.86974	-2.53121
																				-1.35916	-2.36695
																				-1.43959	-1.25638
																				-1.14899	-1.8297
																				-2.32746	-3.08711
																				-1.683	-1.41349
																				-2.26197	-2.00497
																				-1.84684	-1.70744
																				-2.09269	-2.46122
																				-2.31776	-2.3452
																				-1.69164	-1.24619
																				-2.08003	-2.0409
																				-1.41832	-2.50532
																				-2.44492	-1.83661
																				-3.31076	-3.13375
																				-1.29167	-2.39547
																				-2.51972	-2.23218
																				-1.65176	-3.09513
																				-1.49713	-2.64409
																				-2.17557	-2.22064
																				-1.34126	-2.35415
																				-1.73252	-2.64562
																				-2.1864	-1.75018
																				-0.893522	-2.13458
																				-1.80303	-2.61061
																				-1.33981	-3.82677
																				-2.09177	-2.72756
																				-2.49047	-3.07727
																				-2.99074	-3.25339
																				-1.61406	-2.80878
																				-1.99419	-2.77828
																				-1.59289	-2.41203
																				-1.92428	-2.32223
																				-2.29646	-2.18838
																				-1.91725	-2.47766
																				-2.36101	-3.40409
																				-2.00084	-2.71206
																				-1.69928	-3.74732
																				-2.73722	-2.51623
																				-2.7754	-2.20389
																				-2.38283	-2.49828
																				-2.88752	-2.77984
																				-2.13857	-2.73297
																				-1.82011	-1.85672
																				-0.946432	-3.09223
																				-1.56927	-2.78416
																				-1.93981	-2.92498
																				-2.1226	-2.05349
																				-2.75398	-3.62862
																				-1.7712	-2.24187
																				-1.58354	-1.99063
																				4.88051	-2.28105
																				-2.66241	-2.74462
																				-2.79384	-1.39339
																				-1.69001	-2.92061
																				-1.93067	-2.65336
																				-2.16811	-1.83698
																				-1.0563	-2.16414
																				-1.2993	-1.59999
																				-1.75512	-2.46795
																				-3.07456	-2.15952
																				-2.28604	-2.41859
																				-2.84457	-2.49853
																				-1.9983	-1.98357
																				-1.77025	-3.06236
																				-1.5387	-3.45367
																				-1.77926	-2.60464
																				-1.56024	-2.11704
																				-1.85144	-1.3509
																				-0.997143	-2.20189
																				-1.0946	-2.42192
																				-2.23676	-2.48195
																				-1.39313	-2.6575
																				-2.12374	-2.60752
																				-2.90385	-2.10063
																				-2.77794	-2.98937
																				-1.31634	-2.46347
																				-2.66868	-2.4698
																				-1.04615	-2.29856
																				-2.47244	-2.47564
																				-2.41133	-2.22306
																				-3.94177	-2.65271
																				-2.57016	-3.01725
																				-1.5744	-1.29334
																				-1.87575	-2.23805
																				-3.29632	-1.78407
																				-2.62508	-2.40394
																				-2.13274	-2.42894
																				2.04323	-2.55565
																				-2.99958	-2.00441
																				-2.48856	-1.55758
																				-3.27166	-2.1519
																				-2.51863	-1.33218
																				-2.83194	-1.97352
																				-2.91115	-2.54053
																				-3.92273	-1.57911
																				-1.60701	-2.44463
																				-3.16473	-0.700914
																				-2.09117	-1.55619
																				-1.72281	-2.90323
																				-3.09831	-2.26018
																				-1.37864	-2.28065
																				-2.73787	-1.92966
																				-1.31556	-2.07001
																				-2.98018	-2.09583
																				-2.48959	-1.31288
																				-2.24118	-1.00142
																				-1.64092	-3.31371
																				-1.99799	-2.74623
																				-2.12946	-1.47322
																				-2.04313	-1.79006
																				-1.78933	-1.47425
																				-2.05121	-1.9858
																				-3.47828	-2.49151
																				-2.43676	-2.85474
																				-1.89718	-2.16106
																				-1.98685	-1.84919
																				-2.33833	-1.55513
																				-1.74136	-3.00826
																				-1.32332	-2.29693
																				-3.71285	-1.75525
																				-3.52509	-1.62844
																				-2.5584	-2.27331
																				-2.50172	-2.23282
																				-1.6084	-2.97463
																				-1.75371	-2.26492
																				-2.19257	-2.30642
																				-3.57474	-1.49052
																				-2.87412	-2.63997
																				-2.76881	-2.24352
																				-3.90079	-2.06197
																				-1.51956	-3.02908
																				-1.2413	-2.83789
																				-2.28012	-1.27252
																				-1.65632	-1.87758
																				-2.36862	-3.28318
																				-1.63702	-3.08843
																				-2.90813	-2.32613
																				-1.93304	-2.56195
																				-2.92309	-2.18108
																				-2.96786	-1.22909
																				-3.36564	-2.55802
																				-1.8476	-2.18434
																				-3.15841	-2.22526
																				-2.54749	-4.37332
																				-2.37449	-2.75967
																				-2.59978	-1.31286
																				-1.7944	-1.5389
																				-2.49531	-3.52179
																				-2.12597	-2.00652
																				-2.23163	-2.18704
																				-1.19199	-4.03529
																				-2.92525	-2.82062
																				-2.12768	-1.46726
																				-1.45339	-2.68639
																				-2.21748	-2.04776
																				-1.86199	-2.337
																				-0.880978	-2.5683
																				-0.823394	-1.93822
																				-2.08321	-2.6112
																				-1.27296	-1.659
																				-2.35187	-1.76958
																				-3.15434	-2.77737
																				-1.37723	-2.25679
																				-2.71229	-2.062
																				-2.88294	-1.75967
																				-1.99234	-1.61674
																				-3.19523	-3.25124
																				-2.1622	-1.80401
																				-1.84662	-1.25779
																				-1.94825	-1.9805
																				-1.33706	-2.16897
																				-1.45562	-2.39547
																				-3.02315	-1.92503
																				-1.79097	-2.97295
																				-3.08986	-1.81105
																				-2.34565	-1.44891
																				-1.43322	-2.45368
																				-1.28419	-2.09664
																				-2.62499	-2.77705
																				-1.52101	-2.10872
																				-2.14138	-2.47631
																				-3.14122	-1.93961
																				-1.29516	-1.44739
																				-2.83776	-2.75946
																				-1.19444	2.1076
																				-1.43828	-1.37619
																				-2.14716	-2.37605
																				-2.52061	-3.03334
																				-2.15438	-2.08858
																				-1.68048	-2.29054
																				-3.38453	-1.27146
																				-4.48213	-2.19862
																				-2.32114	-3.29939
																				-2.47277	-2.97912
																				-2.13383	-1.90079
																				-3.13062	-3.35434
																				-2.83313	-2.10548
																				-3.63592	-2.31396
																				-1.95355	-1.06729
																				-3.09357	-2.41733
																				-2.19138	-1.96205
																				-1.81169	-3.40137
																				-3.51473	-2.13394
																				-1.81113	-3.83388
																				-1.77635	-2.48927
																				-2.0791	-1.85024
																				-1.76065	-2.65133
																				-3.40689	-2.60385
																				-3.38718	-2.87881
																				-2.88618	-3.3353
																				-2.33277	-3.37219
																				-2.51285	-3.38575
																				-2.10031	-3.42583
																				-1.57545	-1.66076
																				-1.32206	-2.57137
																				-2.30973	-1.70911
																				-1.49942	-2.35467
																				-1.78442
																				-1.60068
																				-2.06123
																				-2.19552
																				-1.55778
																				-3.82744
																				-2.18959
																				3.49347
																				-2.25956
																				-1.04904
																				-1.41305
																				-1.5855
																				-3.66593
																				1.4413
																				-2.25819
																				-1.34409
																				-1.367
																				-1.64172
																				-3.33164
																				-2.03721
																				-2.04729
																				-1.46588
																				-2.66795
																				-1.52157
																				-1.8367
																				-2.76559
																				-2.3723
																				-2.86647
																				-2.90073
																				-2.00892
																				-2.0932
																				-2.25559
																				-2.43391
																				-2.24581
																				-1.37514
																				-1.78166
																				-2.53947
																				-2.30198
																				-3.41759
																				-2.45673
																				-2.26463
																				-2.93769
																				-3.51283
																				-1.28917
																				-0.669914
																				-1.54658
																				-4.22488
																				-1.4893
																				-2.15997
																				-2.4571
																				-2.21197
																				-1.57534
																				-2.53119
																				-1.24357
																				-2.02129
																				-2.25814
																				-2.30454
																				-2.16114
																				-2.42271
																				-2.57833
																				-2.08586
																				-2.30774
																				-1.69662
																				-3.00614
																				-3.08923
																				-1.80909
																				-1.54303
																				-2.40126
																				-0.865798
																				-2.84901
																				-2.28648
																				-1.73178
																				-2.65676
																				-2.24493
																				-2.29328
																				-1.87584
																				-2.57253
																				-2.57249
																				-2.23347
																				-2.24965
																				1.61697
																				-2.56664
																				-2.4972
																				-3.45542
																				-1.40383
																				-1.62726
																				-1.8255
																				-1.80877
																				-2.38502
																				-2.35604
																				-2.49126
																				-1.57194
																				-2.02663
																				-2.35864
																				-2.67937
																				-4.18813
																				-2.42806
																				-3.39476
																				-2.24752
																				-2.31718
																				-1.91108
																				-1.63711
																				-2.43503
																				-2.70089
																				-3.63969
																				-2.65287
																				-4.54394
																				-1.74937
																				-1.64979
																				-1.46705
																				-1.75608
																				-2.04551
																				2.23647
																				-1.14858
																				-1.2802
																				-3.24128
																				-2.35194
																				-2.74832
																				-2.68565
																				-1.89663
																				-1.79836
																				-2.78689
																				-2.22236
																				-1.82743
																				-2.17616
																				-2.88828
																				-1.98517
																				-2.10024
																				-2.15229
																				-2.49515
																				-2.51233
																				-1.56379
																				-2.37278
																				-1.34648
																				-1.74251
																				-2.08335
																				-1.81235
																				-1.43386
																				-2.49985
																				-2.51889
																				-1.68272
																				-1.29058
																				-2.26544
																				-2.42602
																				-2.49724
																				-1.58959
																				-1.07378
																				-2.44797
																				-3.16811
																				-2.56692
																				-2.07409
																				-3.75971
																				-3.12643
																				-2.2497
																				-1.90204
																				-2.58907
																				-2.17865
																				-1.42546
																				-3.11385
																				-2.67493
																				-2.34669
																				-2.10374
																				-2.34024
																				-2.93613
																				-1.52688
																				-1.75967
																				-2.24939
																				0.787853
																				-3.07827
																				-1.25548
																				-3.9504
																				-3.79934
																				-2.21919
																				-2.27652
																				-2.15566
																				-2.1178
																				-2.347
																				-1.38119
																				-2.35788
																				-2.03055
																				-1.71933
																				-2.17193
																				-3.19305
																				-2.4945
																				-2.66041
																				-3.42545
																				-2.56938
																				-2.29951
																				-2.73337
																				-3.97994
																				-1.01307
																				-1.64938
																				-2.32141
																				-1.91113
																				-2.172
																				1.49089
																				-0.397281
																				-2.39858
																				-2.80681
																				-2.12529
																				-2.24571
																				-3.29426
																				-3.42543
																				-1.59333
																				-1.83713
																				-3.04631
																				-2.01223
																				-2.06319
																				-2.20909
																				-2.09432
																				-1.23298
																				-2.03766
																				-1.93191
																				-2.51463
																				-1.19469
																				-2.22349
																				-2.04572
																				-1.8985
																				-2.52229
																				-2.88969
																				-2.80617
																				-2.34167
																				-2.6116
																				-2.20074
																				-2.4003
																				-2.45682
																				-1.4219
																				-1.69775
																				-2.48195
																				-1.79182
																				-2.66026
																				-1.35929
																				-2.40511
																				-2.64141
																				-1.87766
																				-1.95713
																				-1.48666
																				-1.02493
																				-2.68576
																				-2.47631
																				-2.0129
																				-2.53345
																				-2.78648
																				-3.61582
																				-3.00807
																				-1.93019
																				-3.32317
																				-2.31853
																				-2.64204
																				-1.84928
																				-3.8173
																				-2.66816
																				-1.73688
																				-1.66752
																				-2.80356
																				-1.01244
																				-1.02267
																				-1.59835
																				-4.1924
																				-2.61692
																				-2.68711
																				-1.30504
																				-1.85633
																				-0.969498
																				-1.37593
																				-1.06536
																				-2.34051
																				-2.24498
																				-2.59841
																				-2.75076
																				-1.60828
																				-1.39882
																				-2.18963
																				-2.07569
																				-2.76093
																				-2.3782
																				-2.34836
																				-2.51376
																				-1.77263
																				-2.74378
																				-1.51472
																				-2.63771
																				-2.18818
																				-2.20814
																				-1.57103
																				-1.74192
																				-3.17813
																				-1.14007
																				-1.30186
																				-1.84982
																				-1.88096
																				-1.49567
																				-3.26662
																				-1.88276
																				-1.56977
																				-2.07368
																				-1.94197
																				-2.72889
																				-2.54832

## Sheet: Fig 2A
Fig 2A: Tukey plot shows no difference in allelic origin of genic and TE small RNAs between heterozygotes and wild-type. Loci plotted here show similar abundances in wild-type and heterozygotes and have a sum of at least ten allele-specific reads in three wild-type replicates and in heterozygotes. Values described here are % maternal
Genes				Transposons
21nt sRNA		24nt sRNA		21nt sRNA		24nt sRNA
mat nrpd1 het - WT	pat nrpd1 het -WT	mat nrpd1 het - WT	pat nrpd1 het -WT	mat nrpd1 het - WT	pat nrpd1 het -WT	mat nrpd1 het - WT	pat nrpd1 het -WT
-12.0815	62.7273	10.2696	-0.570185	-76.3587	1.8648	-76.0849	-3.96825
-13.8165	50	-4.14747	3.87336	-71.8182	0.564075	-75	-9.61538
9.4638	41.9192	-26.7857	25.4083	-59.6154	9.77778	-67.033	10.6952
-21.2276	40.5128	-26.6387	8.23394	-59.0909	8.33333	-64.2285	16.8784
13.6074	40	-28.0892	-1.65289	-58.7413	-8.99471	-61.9737	6.06061
0	37.7778	4.34783	-0.649351	-54.8718	-11.1111	-61.1111	11.7647
2.66667	35.8586	8.69565	-0.549451	-53.7815	-14.2857	-60.3226	-37.2549
-0.210177	34.5455	5.36842	-13.1222	-51.5385	7.14286	-59.1973	3.03947
-11.5385	34.0351	17.2626	-3.32476	-51.1111	3.1746	-56.6667	13.0235
3.57297	27.9352	-4.70219	-4.34783	-49.1667	25	-56.0355	3.2008
18.2726	27.2727	-8.48713	-18.5771	-46.1538	-29.5455	-55.5556	39.375
30.5525	27.0833	10.3022	12.262	-45.5128	3.78788	-55.5556	-0.779221
-63.6364	26.8382	0	-2.43316	-45.1128	-12.5	-55.3571	-3.4632
-31.4516	26.25	0.700701	13.9847	-43.5897	-26.1905	-55.0877	-18.9286
-37.8676	25.7143	16.876	-3.97419	-42.8571	10	-54.1207	-8.33333
-78.0822	25.7143	-2.69323	10.2787	-41.5584	-8.24176	-53.43	-4.54545
35.619	25	0.264549	4.78771	-40.6863	-8.33333	-52.9412	-0.615385
-1.55196	24.7826	-9.41935	21.4286	-40.5983	-4.60526	-52.2367	-10
-20	24.1758	7.15241	-8.18774	-40	-46.6667	-52.1978	19.8543
9.42441	23.9819	-10.7326	-21.8638	-39.8496	-6.08108	-51.1111	-2.87081
0.545455	23.8095	-3.67647	-2.04545	-38.5714	0.0724138	-51.049	10.6607
-15.5678	23.5294	-1.60115	-7.58974	-38.3772	-3.82775	-50.9474	7.93754
-2.77778	22.2298	-0.549912	-1.91176	-37.5	1.85185	-50	-0.905194
-25	21.8211	63.6364	-2.17175	-37.013	1.76471	-50	-12.1849
12.5668	21.1382	1.25	7.67844	-36.6667	7.05882	-50	-11.9048
-13.8889	21.0869	-2.22222	17.1329	-36.6667	12.2206	-49.89	33.046
-14.6027	20.8438	17.1429	-2.38095	-36.6667	-3.00849	-49.5614	8.32848
20.1299	20.5033	-20.9559	-1.81818	-36.1905	-0.528681	-48.2051	38.3077
-9.59024	20.4158	1.42857	20	-35.4167	0.406125	-48.2051	38.3077
-3.33333	20.3704	-4.7619	-18.0392	-34.9206	2.63158	-47.1429	-6.25
-20.4545	20.3463	6.25	17.6768	-33.6364	-13.0485	-47.0106	9.43223
2.44379	20	-3.75	19.6853	-33.3333	2.82857	-46.9697	-8.34008
-13.5897	19.7368	-10	2.95177	-32.6837	-3.80952	-46.758	-32.069
-18.3258	19.4332	-89.4737	13.7815	-32.381	-5.45455	-45.7666	33.9827
-3.44828	19.25	-5.51075	8.28704	-32.1429	-2.12454	-45.7265	-6.49828
0	17.7273	-16.6667	-44.6336	-31.9231	-2.01238	-44.8529	12.8551
3.33333	17.7069	-87.676	-10	-31.1301	6.06061	-44.7368	18.0177
-3.56322	17.6471	-21.0526	16.2366	-31.016	21.4674	-44.0476	-13.8889
-16.3636	17.4603	-66.6667	10.5263	-30.5882	4.2328	-43.4286	28.0303
26.1538	17.0692	-60	0.322581	-30.4762	-13.1313	-43.2692	1.55458
14.2857	16.7742	0	-6.56643	-30.2564	29.3651	-43.1217	4.83498
3.68421	16.4103	-60	-21.0526	-30	-6.64336	-42.9487	15.9091
-8.67398	16.3636	-28.3333	1.85185	-30	32.5	-42.9412	-34.4482
0.0865801	15.942	-5.88235	19.6078	-29.7619	0	-42.8571	-11.2782
0.117134	14.3333	5.18477	-27.8571	-29.4118	-0.840336	-42.4854	-14.4444
-1.42857	14.1707	0	36.7742	-28.7879	-6.23756	-42.041	14.2857
-28.3333	13.8807	2.92304	4.54545	-28.6713	-12.8205	-42	13.0213
-28.3333	13.8158	2.72727	-20.7822	-28.2051	10	-41.8753	4.56311
-25.5245	13.6974	-6.89655	-19.4837	-27.8788	-8.10811	-41.8605	-30.7692
24.5442	13.4615	-5.55556	-8.33333	-27.7778	-2.91667	-41.7863	7.14286
2.78638	13.3333	10.3333	6.0667	-27.6018	-3.75	-41.6667	30.303
14.3911	13.1429	7.5	0	-27.4725	21.25	-40.1656	-0.888889
-4.23729	12.8527	22.9167	4.59792	-27.381	11.1111	-40	19.1892
-2.92208	12.3574	-19.1176	-4.7619	-27.2727	0	-40	16.087
-12.0347	11.9048	15.7895	0	-27.2727	-15.3846	-40	14.9573
-1.28205	11.7695	20.979	-0.272727	-27.0531	-5.88235	-39.8925	28.8889
4.34783	11.7575	14.2857	19.4684	-26.9841	-5.45455	-39.4231	9.21053
-5.88235	11.6667	1.28205	16.9805	-26.6667	-8.57143	-39.2437	6.06061
10	11.6667	1.26901	-7.14286	-26.6667	-6.17647	-39.2308	-25.974
-3.13125	11.6466	0.968992	26.9231	-26.6667	-6.08108	-39.1775	78.9474
-8.99422	11.4551	11.7647	0.756922	-26.3462	-15.2357	-39.1579	-19.2008
-2.93522	11.4286	1.69009	-3.72671	-26.2255	-36.6667	-38.8889	46.875
-5.62771	11.2782	-3.84265	-3.33333	-25.9615	-17.1336	-38.7955	0
7.60234	10.9804	-6.94354	0.0434286	-25.8772	-8.04598	-38.756	13.37
10.8889	10.9474	-8.18182	5.39011	-25.7919	1.28824	-38.4615	22.3684
-4.18632	10.6026	-73.1707	-0.697674	-25.7253	-11.9048	-38.2665	2.22222
7.55208	10.5514	-0.396222	11.7647	-25.7143	1.01887	-38.1818	-23.6111
19.5652	10.1299	15.5556	3.85869	-25.5515	-10.2241	-38.1579	26.6667
3.98724	9.66387	0.754148	1.66484	-25.4902	0.649351	-37.9587	-0.219298
-73.6842	9.61538	-24.1758	0.750452	-25.3197	-10	-37.9257	-0.487988
-41.6667	9.14634	-3.44828	25.4658	-25.3188	-20.8333	-37.8095	3.50877
-17.1569	9.04762	-18.8889	0	-25.2174	-25	-37.5	-9.56522
1.91388	9.04762	7.76886	-0.308895	-25.1034	-3.63636	-37.3329	0.714286
4.78469	8.49673	-5.45073	6.59322	-25	-5.54622	-37.3077	21.4286
-9.87526	8.33333	-0.464363	-7.59907	-25	-9.47179	-37.1661	16.6667
-9.52381	8.33333	-12.7189	13.4959	-25	-9.51967	-37.0515	-15.6062
-3.92606	8.23529	-7.69231	-0.460137	-25	0.464617	-37.0227	-8.76068
-13.9646	7.52394	-0.152258	2.08502	-24.5989	10.4859	-36.8342	3.74269
24.4737	7.38916	-6.69856	5.55556	-24.1259	11.1789	-36.6667	4.70958
5.55556	7.31225	-23.6364	0.326797	-23.9474	9.25926	-36.5385	-5.76499
-3.84615	7.27273	-3.7594	-33.0484	-23.8095	-10.1604	-36.3235	-4.35065
-1.78571	7.21925	-0.676328	-3.44828	-23.7762	13.0952	-36.2963	14.5833
-0.577061	7.14286	4.74515	3.125	-23.6111	0	-36.2857	35
9.09091	7.11462	8.33333	-19.2308	-23.4114	-18.254	-36.1538	-6.91964
9.11765	6.86275	10.7143	-2.72989	-23.3333	-16.3636	-36.1538	-13.6905
29.5639	6.66667	2.08333	-13.3333	-23.3333	-15.0327	-36.1345	-1.11111
-5.19481	6.56566	-12.8483	-2.38095	-23.3333	10.6952	-36.0577	0.402844
-17.1429	6.31579	13.468	8.21999	-23.2955	-5.12821	-35.7143	-0.20546
-26.7206	6.23656	0.595238	-1.43369	-23.0994	5.06775	-35.4839	-6.33478
-1.38889	6.1273	8.96552	-2.31509	-23.0769	4.66667	-35.2941	-29.6296
-8.64346	6.07581	4.67742	0.0689007	-22.973	-5.14354	-35.1351	-1.17647
-18.1746	6.06971	-5.86008	-1.42976	-22.8571	-4.96192	-35	-13.1572
5.25666	6.03509	6.85484	1.55172	-22.6244	-1.13379	-35	19.3182
-14.0331	5.88235	2.75845	-33.2016	-22.5064	-18.1961	-34.8263	-9.09091
-1.32275	5.82101	13.4804	2.83401	-22.4585	-13.3333	-34.7222	15.2572
-17.931	5.68182	13.8095	6.88889	-22.3118	-6.27724	-34.6154	-0.678733
23.8095	5.66416	0.289352	20	-22.2222	-13.6842	-34.5455	25.2525
3.36842	5.55556	-9.34343	9.68022	-22.2222	0.757576	-34.4961	6.13071
20.9091	5.55556	0.396825	2.08333	-22.2222	-1.26984	-34.4633	12.5943
-4.3573	5.26316	-4.49098	-2.45614	-22.1053	-10.6838	-34.4482	-10.7527
1.41509	5.20362	-4.77487	-9.25926	-22.0588	-5.83333	-34.3891	0
23.5294	5.02283	-3.91247	22.7619	-22.0245	1.75439	-34.2657	-2.49974
-5.11364	5	-2.5974	-3.55396	-21.5839	-17.125	-34.1176	24.7024
-6.79348	5	2.97834	4.28571	-21.5385	16.6667	-34.0896	-4.78922
15.7895	4.93827	-11.1111	1.98511	-21.5385	1.91304	-34.0326	0.750751
12.3094	4.7619	27.2727	-11.8421	-21.5385	-2.34114	-33.9744	3.46482
10.5214	4.6846	11.1723	-3.86371	-21.4286	0.30303	-33.9189	11.6523
0.292398	4.41176	13.3333	5.71848	-21.3439	20	-33.7895	5.6132
-3.77358	4.38596	26.5741	-0.75188	-21.1538	1.25189	-33.7691	25.303
-20	4.35897	11.4146	4.43292	-21.0227	-1.20075	-33.5913	21.6814
38.2775	4.22535	6.82124	7.64706	-20.8791	0.239314	-33.3333	-9.54848
28.1122	4.22078	1.65039	6.23377	-20.5882	0	-33.3333	-13.2827
-20	4.16667	-16.6667	19.2308	-20.5882	-32.967	-33.3333	0.394372
4.44444	4	2.46643	-1.5625	-20.5714	-16.9231	-33.2767	6.59341
-2.6049	3.97727	3.40453	11.1111	-20.5128	38.5375	-33.2016	12.6853
0.814536	3.95894	-5.88542	3.84615	-20.1754	15.5303	-33.1034	2.55688
7.62765	3.76994	-3.16067	14.3137	-20.1299	-5.06536	-33.0464	-1.09587
8.18859	3.62903	5.26316	-16.7084	-20	17.9144	-32.9966	-8.40276
12.9372	3.57143	4.96624	-9.09091	-20	-11.4286	-32.8671	6.45503
13.4161	3.56902	-11.7647	-9.23845	-19.7917	-5.45455	-32.8142	-12.8947
1.06952	3.4632	-0.806253	-13.9743	-19.7802	6.66667	-32.7381	40
6.76692	3.33333	3.67101	5.09345	-19.7479	2.85714	-32.7273	12.6786
-3.61905	3.19183	6.94683	-0.186104	-19.7368	2.85714	-32.6482	-7.40022
16.9697	3.125	43.6508	0	-19.3182	6.97005	-32.5	-2.08333
9.77131	3.0303	-11.0211	5.513	-19.2982	23.2143	-32.4786	-4.20685
0	3.02368	-0.596954	12.5	-19.1826	-1.51515	-32.4074	-7.27889
3.82775	2.94118	18.75	-6.94687	-19.0476	5.95238	-32.33	-6.88861
18.4211	2.93047	-4.99813	27.9221	-19.0016	8.36335	-32.3232	8.19257
-19.3103	2.91667	-2.68432	-15.7012	-18.8312	5.76923	-32.1429	-9.44444
-16.7667	2.89721	9.88313	7.58808	-18.8302	-10.5691	-31.8844	48
5.34799	2.81385	9.75007	1.4951	-18.8235	10.4167	-31.8182	-9.19294
2.77778	2.7972	3.58066	-19.6078	-18.8235	30.9091	-31.8182	-3.33333
-1.54799	2.7451	-7.58574	31.2169	-18.797	-14.0152	-31.8182	16.6667
14.0083	2.63158	0.927435	-4.76718	-18.75	-21.1765	-31.6667	15.1748
4.17582	2.59259	-9.81413	5.48449	-18.75	5.41667	-31.6602	5
-3.45455	2.2409	-26.2032	3.39901	-18.75	10.5263	-31.6043	6.31579
-11.3971	2.20529	-1.21212	-15	-18.7325	4.63615	-31.4932	-17.7094
-19.5896	2.04082	1.14321	-3.3172	-18.7192	-1.91518	-31.3725	3.1874
-10.5208	1.95659	-1.52207	-1.06931	-18.6813	-16.2988	-31.3656	-8.54342
22.9091	1.8595	-2.67137	-10.5128	-18.6321	10.6495	-31.25	0.679012
12.8571	1.84211	-5.77192	-5.27233	-18.6186	4.71429	-31.25	-11.6667
-28.6638	1.8018	9.20719	-3.40909	-18.5355	0.389864	-31.2195	-19.25
15.7343	1.7316	0	-3.82775	-18.5116	16.6176	-31.1538	-9.13043
-8.39161	1.69173	12.79	4.81376	-18.415	2.04082	-31.0526	-10.3261
-0.877805	1.58207	-4.85294	-3.43276	-18.3333	10	-30.8036	7.22277
-1.39878	1.5625	11.0912	-2.18354	-18.2266	-3.0303	-30.7692	0.560234
3.26012	1.27077	6.71351	-3.58304	-18.1818	-1.38889	-30.7692	0.809717
-3.85791	1.25	2.18685	-6.00156	-18.1818	8.2945	-30.7692	38.1988
0.854701	1.2428	7.72668	-17.2956	-18.1319	-1.96078	-30.5703	4.23197
-8.33333	1.17057	-6.16883	9.72222	-18.0995	6.49351	-30.3828	-23.8811
-9.97151	1.12782	13.2775	12.3768	-18	-12	-30.1715	-13.9037
-4.70323	1.12617	15.2493	1.50417	-18	-6.25	-30.1538	7.30759
-6.98198	1.08893	12.9117	-1.25	-17.9048	-4.80769	-30.1446	-5.04202
14.386	1.03801	11.2877	5.80853	-17.8378	18.75	-30.0178	6.58073
26.6667	1.00402	-11.1505	-2.20943	-17.8261	-11.5385	-30	8.12594
0	0.883266	12.2778	2.99332	-17.803	1.07335	-30	61.9048
0.652316	0.85443	-15.3684	15.3718	-17.7956	0	-30	27.7778
-4.89289	0.769231	0	-10.7315	-17.7778	10.2564	-29.9537	-0.211977
4.54545	0.734648	-4.34783	-3.89851	-17.6471	0	-29.9043	1.92616
-1.85759	0.666667	-44.3182	-14.0187	-17.6471	-1.40944	-29.8246	-1.28205
16.8627	0.65271	-4.97319	-26.2032	-17.5439	-19.2105	-29.7619	2.17662
15.1304	0.636943	4.74581	8.88889	-17.5	-0.877193	-29.4837	18.6713
10.0597	0.626307	-1.97225	-14.2375	-17.2811	27.7512	-29.4643	30.0654
6.7734	0.614439	-5.26316	1.89673	-17.1717	-19.0476	-29.4118	-9.59598
-26.92	0.608448	-5.63492	0.0538793	-17.0922	18.2469	-29.375	11.0255
-3.72561	0.588235	4.16667	-3.2565	-17.037	21.6667	-29.3333	-0.144166
-5.14286	0.573727	-30	8.4048	-16.8449	-9.47712	-29.2857	-7.93651
-41.4216	0.559075	-1.75439	1.44013	-16.8182	-2.42424	-29.2683	14.1176
-52.4261	0.39574	3.67502	-11.8045	-16.6667	14.9206	-29.2593	0
44.1176	0.383398	5.18277	27.6471	-16.6667	-3.78788	-29.2208	-10.444
-21.9697	0.358974	7.53434	8.52713	-16.6667	11.4815	-29.0476	-13.3333
5.9009	0.336134	-7.96785	-4.54045	-16.6667	7.05128	-28.9185	-10.5642
11.3757	0.324675	-2.51899	-0.0744048	-16.6667	-9.80392	-28.8949	-8.59649
-3.33333	0.217554	-3.93848	-1.06916	-16.6667	-7.14286	-28.8889	1.24521
-14.7059	0.193302	10.7143	0.519774	-16.4835	8.22511	-28.7649	-1.66667
12.2807	0.121448	0	-2.58326	-16.4736	-13.7596	-28.75	13.1868
5.84445	0.0876764	-7.14743	8.92707	-16.4021	-9.21053	-28.7138	-2.7955
-9.81818	0.0262476	14.4615	6.86275	-16.3866	11.336	-28.6486	34.6269
28.3333	0	-4.02299	-4.45455	-16.3636	-8.09524	-28.5714	1.66667
-3.4632	0	-16.0207	-6.02968	-16.3462	18.9394	-28.5714	19.0909
0	0	9.31613	4.94624	-16.2465	-7.30769	-28.5714	-0.961538
-7.07692	0	5.88732	4.12698	-16.2393	-1.06254	-28.5701	-2.74725
0	0	11.4286	-1.69697	-16.2219	5.22876	-28.5027	-9.46858
10.2273	0	15.6015	-20	-16.2037	-4.10256	-28.3744	12.0614
-7.14286	0	2.82931	7.37858	-16.1765	-25.4658	-28.3333	2.90323
-7.69231	0	-3.80195	-7.47716	-16.1376	-27.2727	-28.1542	17.3349
6.66667	0	5.12821	-1.33333	-15.9259	-25.4545	-28.0303	5.92075
-7.53191	0	0	2.70886	-15.873	-1.75439	-28	3.15431
17.0833	0	-3.31788	-5.14706	-15.812	12.1212	-27.9487	33.8462
6.72269	0	-7.28558	-17.8571	-15.7895	23.31	-27.9167	30
-36.5385	0	4.39437	-6.36237	-15.754	27.381	-27.8997	24.7863
1.31579	0	-17.1429	0.718299	-15.7143	0.649351	-27.7778	1.4779
4.61538	0	0	-6.58921	-15.6566	41.1483	-27.7778	2.69481
23.1092	0	-0.271647	-23.4127	-15.6566	17.7778	-27.6983	18.5714
10.8818	0	-42.8571	-3.67647	-15.5882	0	-27.6901	-30.5556
13.545	0	7.14286	22.8571	-15.5556	7.35931	-27.6382	15.9521
16.9231	0	1.92459	-1.75439	-15.4979	-27.381	-27.5641	17.9807
-11.5033	0	-3.8961	0.551572	-15.4762	3.49487	-27.5166	-17.5325
0.656814	0	10.3544	1.79281	-15.4545	-20.979	-27.3684	-13.0682
-7.77778	0	-2.71981	-3.64312	-15.4545	4.27632	-27.3618	-3.11594
0	0	-7.5	-5.74288	-15.4545	-8.92857	-27.3311	4.10256
22	0	25	-1.68647	-15.4286	11.5385	-27.3109	16.4306
-12.0066	0	48.3333	-3.93848	-15.3453	-12.3387	-27.264	3.71786
-6.97279	0	23.0769	-8.33333	-15.3439	-25.1553	-27.2442	3.87911
-7.14286	0	16.3415	-0.1773	-15.0588	1.38889	-27.193	33.5532
-26.6667	0	-8.85965	3.77778	-15	-0.385074	-27.1339	9.02379
21.6667	0	3.63884	-6.40394	-15	7.10526	-27.1196	34.5238
21.7105	0	-2.89855	9.90525	-15	-9.84991	-27.0677	6.00601
35.7143	0	-67.0543	-2.1697	-15	-3.33333	-27.0082	-6.66667
6.25	0	-78.8732	-3.46403	-15	-14.3631	-26.9841	30.9524
2.22222	-0.0621118	-40	-8.57143	-14.7059	4.81283	-26.8519	50.6739
1.47059	-0.280112	-66.6667	5.95238	-14.7059	28.5714	-26.8132	-1.46564
-2.42154	-0.324374	-44.641	15.3743	-14.7059	6.64962	-26.7857	-24.0079
38.961	-0.327995	-57.7953	4.49294	-14.6377	18.5714	-26.7206	-14.9123
12.7451	-0.348892	-46.7391	2.11016	-14.6154	-6.96933	-26.6925	6.15942
-3.61991	-0.35461	6.26728	41.0256	-14.4231	3.33333	-26.6667	8.33435
-23.4848	-0.357292	-6.25	-2.5641	-14.2857	-19.3878	-26.6667	0
9.04762	-0.37234	-4.80519	-6.7378	-14.2857	12.5	-26.6082	5.41958
-22.7148	-0.379645	12.9444	-10.3462	-14.2045	-10	-26.5446	-1.4902
-6.28571	-0.409999	-20.8305	-0.303203	-14.1775	12.746	-26.4928	45.8333
7.14286	-0.411889	-11.5359	-5.95745	-13.9818	3.88721	-26.4706	21.8932
-11.1842	-0.4329	-0.875422	-22.2222	-13.9208	5.34562	-26.4286	17.5439
-17.2906	-0.446872	-9.64836	0	-13.9037	30.6667	-26.4254	-0.896057
-16.4912	-0.568774	1.28205	-33.9286	-13.8889	19.9381	-26.3889	100
-5.88235	-0.649351	1.13132	22.8571	-13.8889	25.4545	-26.2148	13.0526
31.25	-0.694444	-18.1818	5.55019	-13.6829	6.69975	-26.1905	15.3247
-12.3636	-0.730994	3.32244	1.22807	-13.6364	5.15031	-26.1538	-43.4343
-1.05263	-0.766284	-44.8864	-1.98511	-13.6364	6.66667	-26.098	33.3333
0	-0.865801	4.41176	-1.55039	-13.5897	0	-26.0734	2.00655
0	-0.904046	0	29.8686	-13.5714	-6.41026	-26.0647	-4.20168
1.7094	-0.909091	0.741326	1.19223	-13.5417	33	-26.0619	-2.15054
18.7166	-0.925926	0	-1.829	-13.5076	4.81481	-26.0484	7.01356
-18.75	-1.07449	2.38095	-9.72222	-13.4921	0	-26.0188	2.0389
-10	-1.13216	-8.22595	-6.06061	-13.4211	0.239897	-25.9804	0.454656
-1.66106	-1.19048	-8.19512	10	-13.3333	21.3343	-25.7937	8.46702
-2.27273	-1.2381	-0.230769	24.4665	-13.3333	2.1978	-25.7653	-11.9036
0	-1.42857	-6.83761	12.7778	-13.2918	-5.88235	-25.7143	17.4129
0	-1.47059	-2.86275	-1.86789	-13.2843	29.4118	-25.6876	12.5
0.681867	-1.55556	-18.6992	-1.0467	-13.2239	0.487013	-25.6752	-6.92641
15.5556	-1.66667	-1.63401	1.27907	-13.1944	-27.1429	-25.534	20.5882
-6.27618	-1.75439	-8.00432	0.746269	-13.1568	10.2003	-25.4714	-5.05031
-5.59441	-1.88679	-6.02291	-0.769231	-13.1429	-7.34266	-25.4545	-5.83333
3.2459	-2.20858	5.60495	1.11407	-13.1222	25.1282	-25.4545	2.72727
-10	-2.40132	-13.8889	8.57143	-13.0952	8.92857	-25.403	-5.74095
-21.3315	-2.63158	-5.67766	2.37987	-13	-13.8958	-25.3589	1.64706
-1.001	-2.75687	-2.85714	-2.7767	-12.9431	7.07547	-25.3333	-10.6559
-7.43034	-2.83401	-12.0567	0.00582662	-12.9412	1.1362	-25.2476	-13.3333
-8.44156	-2.90816	-11.1111	1.75	-12.931	-16.6667	-25.2381	11.2434
-1.75439	-2.94643	-4.64597	-11.7647	-12.9006	12.6263	-25.1634	-16.5149
-5.7841	-3	6.32799	10.2564	-12.8788	-25	-25.1515	1.07705
4.7619	-3.0303	1.25	-17.6471	-12.8571	2.46154	-25	-26.6667
-8.88158	-3.15789	-19.7222	-14.7145	-12.8205	-18.3156	-25	4.04858
-9.93915	-3.15789	12.2756	-3.57143	-12.7273	1.21173	-25	-0.237477
16.6667	-3.1746	26.9231	-1	-12.6951	41.4392	-25	-15.6353
-15.3533	-3.26087	1.28335	4.2069	-12.6781	18.3333	-25	4.82686
-6.53595	-3.36134	12.6956	10.119	-12.5	-33.7469	-25	2.53968
-10.7621	-3.50877	-3.7037	31.5385	-12.5	-10.3896	-25	-4.79963
11.9015	-3.57143	-0.755048	-25	-12.5	12.8571	-25	-30.6122
-18.8811	-3.57162	-2.29861	4.55959	-12.3913	0	-25	-1.16959
-10.6061	-3.75	-17.2811	-0.71232	-12.2807	-7.22679	-24.972	-2.80665
0.15873	-3.79562	1.96678	0	-12.2807	-13.5135	-24.9354	-4.25557
-2.38095	-3.80952	1.74603	-6.25	-12.1212	-2.33766	-24.878	1.78372
-7.08333	-3.84615	33.8462	-8.16532	-12.1212	0.328947	-24.8366	-5.78821
7.35585	-3.85396	5	2.08287	-12.1048	21.4286	-24.7918	0.458115
-7.14286	-3.92157	12.6263	29.7048	-12	8.48485	-24.7722	7.30828
1.39925	-4	18.5271	-2.37069	-11.9565	-3.5	-24.6753	0.828883
-27.4436	-4.02103	-7.24986	4.71014	-11.9048	0	-24.5469	3.97094
-24.1071	-4.0404	29.5195	4.84211	-11.8729	3.47826	-24.5176	14.1523
1.16279	-4.09408	2.34702	-8.33333	-11.6959	18.75	-24.5059	-3.07725
-2.94872	-4.15959	5.72151	-19.2308	-11.6364	27.2727	-24.4984	6.11284
-15.5	-4.1806	10.2396	13.5789	-11.6271	8.42105	-24.4444	-15.6522
27.7778	-4.35448	-1.81191	5.22876	-11.6162	-24.4444	-24.4437	22.7778
32.5758	-4.38596	5.87583	-10.436	-11.6093	24.5455	-24.4048	-1.6977
-3.37838	-4.60358	5.66082	0.25974	-11.5619	17.8261	-24.391	-8.53659
-23.7443	-4.62963	3.57879	1.37255	-11.5616	-5.02128	-24.3452	-9.05488
-27.2059	-4.67742	1.69492	-13.4545	-11.5385	0	-24.3243	23.0159
-16.6667	-4.76889	0.980392	-1.97427	-11.5106	-12.0393	-24.2857	2.45098
3.7037	-4.80769	-1.31567	-0.449438	-11.5033	-52.7273	-24.2857	13.1868
-21.0526	-5	5.45552	-14.5714	-11.4729	17.5	-24.2706	-2.53553
-4.54545	-5	7.85953	-24.5455	-11.3708	19.2308	-24.1848	1.54536
-22.6667	-5.19481	12.2291	-2.5	-11.25	5	-24.1837	-0.660308
2.92135	-5.2172	-5.01742	3.64372	-11.1663	-14.4737	-24.1684	-1.69683
20	-5.35714	10.2564	-1.8254	-11.1111	8.82353	-24.0845	12.7727
-20.9091	-5.38462	0.595238	-45.4545	-11.0969	20.2381	-24.0102	2.46512
30	-5.48589	-15.7119	1.81818	-11.0048	16.9355	-24	-1.66667
6.73077	-5.49179	-8.03571	8.33333	-11	9.7973	-23.913	-3.70968
9.09091	-5.54827	0.233918	-14.2857	-10.9988	4.08163	-23.913	10
-10.6667	-5.66802	8.22281	-20.8333	-10.9244	1.38444	-23.8274	-0.961245
-2.78793	-5.84416	-33.3333	30.3241	-10.9091	3.84615	-23.8095	-4.96894
0	-5.88235	24.4589	-7.83699	-10.8621	5.2381	-23.8095	3.90536
4.41777	-5.88235	-2.45098	-11.4286	-10.8602	9.77011	-23.8095	8.44506
28.4722	-5.88803	-30.0699	13.6364	-10.8333	-15	-23.8095	6.36593
-2.10665	-6.00686	-7.03297	21.0526	-10.8262	-15.8865	-23.8095	-16.9231
0	-6.01726	-18.6742	-1.25647	-10.8225	12.5	-23.7599	-13.2415
-10.6061	-6.34758	-15.1682	1.11111	-10.7393	21.2418	-23.75	0.453515
3.4965	-6.48314	2.23954	-11.4006	-10.7143	0.454545	-23.75	15.873
-5.44872	-6.57895	7.29167	13.7097	-10.7143	-28.6486	-23.75	-1.74731
2.25281	-6.66667	-24.3011	-6.26802	-10.7143	4.73396	-23.7154	10.0164
-1.08932	-6.66667	-0.0755531	-2.14286	-10.6178	-5.30303	-23.711	-21.3235
10.126	-6.66667	-10.9787	0	-10.5769	-4.16667	-23.6842	6.94444
-2.63566	-6.69565	-10.371	20.0127	-10.5769	52.381	-23.6842	2.74494
-4.16667	-6.89103	-1.14189	-2.77778	-10.4839	14.4444	-23.6111	-30.5556
-5.39353	-7.06436	11.4286	12.9712	-10.4762	11.1111	-23.6004	-33.3333
-36.9231	-7.10299	-7.06605	2.13055	-10.4167	-12.5	-23.5948	-19.2593
-10.5364	-7.17949	21.2826	-20	-10.4167	3.78788	-23.5365	-28.9655
-25.9259	-7.36434	-2.05128	13.193	-10.4167	16.5848	-23.5276	-11.6667
4.84848	-7.47253	-7.20503	-40	-10.303	-5.79545	-23.4848	-7.8637
-14.2534	-7.69231	5.37502	30.7971	-10.303	0	-23.4651	-23.6111
16.2471	-7.74725	0.0519621	13.9954	-10.303	-6.63818	-23.4188	8.88889
24.8366	-7.84314	-7.14286	6.99605	-10.2941	20	-23.4127	-2.37154
-0.30303	-8.33333	-7.24638	-1.87023	-10.2941	3.92157	-23.4043	-2.63158
19.0476	-9.13462	5.88235	-0.459944	-10.2564	12.6448	-23.375	7.61494
-3.66202	-9.52812	2.03938	2.09995	-10.254	13.0526	-23.3333	11.7725
7.40741	-9.60591	-1.35641	-12.0833	-10.1888	31.9231	-23.3333	-5.86695
-6.66667	-9.69697	-14.3939	0.186393	-10.1324	4.09266	-23.3333	-5.47489
-0.396825	-10	0.786761	-10.4888	-10.101	-33.3333	-23.262	2.75862
-14.0686	-10.0253	43.4243	5.11364	-10.0649	5.26316	-23.2456	5.36383
6.14035	-10.3365	-7.80142	-1.26582	-10	-0.302198	-23.2353	4.34511
12.5	-10.5263	-0.814241	4.7619	-10	26.25	-23.1579	3.25581
-7.07804	-10.5306	-10.5263	0.738443	-10	-2.77778	-23.1495	8.09179
11.746	-11.33	-1.30068	-27.0968	-10	-1.98429	-23.126	-12.1622
13.0952	-11.7647	18.7984	-1.47059	-10	-0.282004	-23.0835	12.7334
-1.81818	-11.7789	-6.4652	7.7957	-9.89474	0.0985154	-23.0769	-6.57969
7.92453	-11.8088	-28.9655	-5	-9.84848	-0.469484	-23.0769	-15.8645
1.66667	-12.2222	12.4155	14.3695	-9.84615	0	-23.0769	15
-2.30263	-12.6008	4.10256	15.4762	-9.80392	1.09312	-23.0769	2.33918
8.33333	-12.6374	1.45513	-8.33333	-9.79021	-16.6667	-23.0769	35.9597
9.89305	-12.782	0.526333	12.2685	-9.73095	1.38973	-23.0556	12.8571
-4.52174	-13.1016	-5.68106	16.3306	-9.64286	6.16077	-23.0519	8.82353
7.05184	-13.3333	1.13664	-12.3077	-9.59596	3.33333	-23.0459	-15.873
-2.61905	-13.4271	8.74254	-6	-9.56522	18.1818	-22.9911	10.4167
-5.66265	-13.4783	1.57658	-0.578035	-9.52381	0	-22.9412	3.80952
10	-13.7427	13.6364	11.1538	-9.47205	-3.80952	-22.9056	47.1429
3.33333	-13.8889	-2.41935	22.3529	-9.43396	-3.57601	-22.807	-13.4623
0.509338	-13.9149	3.1746	0	-9.42623	6.45933	-22.7778	11.1111
20.1743	-14.4095	-21.5	-27.2727	-9.39394	-3.25625	-22.7778	-8.57143
-2.29885	-14.7059	-1.60256	0.10101	-9.375	-7.07317	-22.7513	5.11127
-48.6842	-14.7692	-24.7826	49.9275	-9.31677	16.5533	-22.7273	3.26577
-0.757576	-14.8452	-50	24.6154	-9.25926	-11.2689	-22.6667	-3.26838
15	-14.9038	25	30.5613	-9.21053	27.46	-22.5892	3.28203
3.20197	-15.415	1.22202	-1.51515	-9.14846	-7.40741	-22.5862	-6.37985
11.1751	-15.7895	-4.41661	-6.36364	-9.13313	-5.81977	-22.5806	7.06897
0	-16.0839	0	8.77193	-9.09091	0	-22.5366	4.36275
8.20513	-16.0839	-0.411798	1.11111	-9.09091	0	-22.5307	-33.3333
-0.757249	-16.1111	-1.75994	-0.371747	-9.09091	2.77778	-22.5175	-5.02345
-37.619	-16.1538	-1.00063	6.56285	-9.04903	3.0303	-22.5	84.6154
	-16.1765	7.74798	-3.33333	-8.9372	-3.8961	-22.4423	4.44444
	-16.6667	11.7391	1.36364	-8.9372	0	-22.3478	21.3184
	-16.8498	-12.1751	17.3636	-8.86119	-17.1171	-22.2536	-11.6733
	-18.0073	9.43698	32.6633	-8.83838	26.6667	-22.2518	50
	-18.1818	-9.33333	1.2012	-8.82353	3.22581	-22.2506	50
	-18.1818	14.7081	-7.22135	-8.82353	-3.33333	-22.2384	-8.79121
	-18.8372	9.04545	48.3333	-8.65741	-19.8873	-22.1875	1.25477
	-19.3182	19.3924	0.655201	-8.62745	25.4545	-22.1729	22.0675
	-19.3333	7.35176	0.907706	-8.58586	23.7726	-22.1729	25
	-19.8413	1.54321	5.16802	-8.55792	-8.33333	-22.1591	-20
	-20.5882	-1.83391	0.0131629	-8.46154	16.1538	-22.0779	-18.0147
	-20.7692	13.001	13.1868	-8.37321	1.59705	-22.0635	-2.58868
	-21.4118	4.85596	0.607282	-8.33333		-21.9697	-12.1682
	-22.3602	-1.8948	-5.78088	-8.33333		-21.9608	-8.7963
	-23.0769	-5.26316	3.77493	-8.33333		-21.9048	5.33212
	-23.3333	1.93738	-47.9167	-8.33333		-21.875	-25
	-23.5	-2.44696	0	-8.33333		-21.8519	8.57143
	-25	0	-1.27392	-8.33333		-21.8145	-20
	-25.8581	11.3577	0	-8.33333		-21.7778	15
	-26.9231	59.2133	1.50376	-8.29493		-21.7593	8.33333
	-26.9537	-2.08333	-5.69389	-8.28804		-21.7554	6.05828
	-27.2531	24.7253	15.5827	-8.26286		-21.7391	21.8182
	-27.5	-13.6471	4.97558	-8.22222		-21.657	-17.9348
	-28.0093	-4.29448	-9.25307	-8.20513		-21.6524	5.55556
	-29.3333	-4.98637	-7.38211	-8.18182		-21.5278	3.47461
	-29.8643	-5.16408	-33.3333	-8.18182		-21.501	23.3333
	-30	19.6691	-2.18114	-8.16993		-21.4858	-5.50285
	-30.3571	4.88095	4.47974	-8.14536		-21.4633	-23.8548
	-31.1818	5.95238	1.48291	-8.1448		-21.4286	15.4762
	-31.6883	-4.94368	-0.882909	-8.07402		-21.4286	-23.943
	-33.6364	13.0169	-4.13279	-8.01394		-21.3889	-11.3725
	-35.8836	12.5	-5.67766	-8		-21.366	-3.41897
		12.0952	8.42491	-8		-21.3278	-5.62963
		13.3507	-3.75	-7.95518		-21.2798	10.2007
		0.538784	-1.51515	-7.91667		-21.2191	9.70732
		-20.9967	39.2857	-7.86914		-21.2121	1.25
		-3.92817	-12.5	-7.85714		-21.1765	16.3636
		6.89907	-6.98925	-7.85714		-21.1685	-1.15688
		-1.06082	4.5098	-7.82609		-21.1538	16.1765
		-0.0232025	3.65385	-7.81955		-21.0366	-7.17678
		-27.8195	16.1364	-7.69231		-21.0227	-16.6978
		-2.28859	13.0769	-7.69231		-20.9821	7.43448
		20.9589	4.70085	-7.68484		-20.9524	-9.27871
		9.89011	-42.2608	-7.61905		-20.928	4.3807
		3.01605	-30.9091	-7.56743		-20.8595	5.39632
		-5.21157	0.918342	-7.55814		-20.8333	-45.2381
		2.97486	-4.86265	-7.5		-20.8333	4.00325
		-2.27072	12.6068	-7.5		-20.8038	-2.64151
		9.89011	-3.7037	-7.49323		-20.7792	-4.16667
		-11.6223	0.940998	-7.40741		-20.7792	-10.7407
		-19.8261	-19.4118	-7.31092		-20.7391	-15.7143
		8.57143	31.4815	-7.29412		-20.7283	2.8867
		-4.73603	3.52941	-7.25953		-20.6767	-2.26595
		-5.66643	-12.2581	-7.23026		-20.6302	-27.4725
		0	-8.20106	-7.19697		-20.5882	-26.8519
		-5.73783	2.60781	-7.14286		-20.5353	1.11353
		-37.8788	0.655476	-7.14286		-20.5268	-26.5079
		-21.5311	5	-7.14286		-20.5128	11.3487
		-6.87831	-8.00866	-7.14286		-20.5128	0
		6.26566	34.5614	-7.14286		-20.471	15.5559
		1.19048	-2.01355	-7.06522		-20.4657	10.1496
		10.989	7.00483	-7.06122		-20.4509	4.95626
		-1.65312	11.5429	-7.03091		-20.4396	13.2596
		-11.6601	0.351227	-7.01754		-20.4334	-3.4063
		3.67423	0.674188	-6.95187		-20.4279	-7.65504
		2.66667	-4.61538	-6.93138		-20.3846	-0.350877
		0.204288	18.3872	-6.8926		-20.3689	-19.0038
		-33.3333	4.5122	-6.81818		-20.2399	8.97436
		0	-10.5153	-6.78972		-20.2273	7.14286
		-8.28877	-9.16667	-6.71159		-20.1818	-9.7186
		-18.0702	3.27883	-6.66667		-20.1786	16.6667
		4.24403	0.714286	-6.66667		-20.0828	-17.9842
		8.1228	-21.1325	-6.66667		-20.0715	-19.3676
		31.25	3.33333	-6.66667		-20.0565	0
		-4.915	-1.71443	-6.66667		-20.0292	-9.20716
		-6.22222	-1.3247	-6.66667		-20	2.52878
		-14.3365	24.359	-6.54762		-20	15
		4.72001	-4.01436	-6.52184		-20	-0.474547
		-3.84615	-0.822368	-6.42857		-20	19.6078
		-14.2857	13.2683	-6.37652		-20	-9.25926
		5.71429	4.16667	-6.30499		-20	-17.9032
		0.489596	-10.3896	-6.30252		-20	0
		-4.12979	25.5166	-6.29371		-20	-1.2012
		-13.6905	-22.3214	-6.25		-20	17.7778
		4.7619	-0.223336	-5.95238		-19.9275	7.07692
		0.02975	-10.4369	-5.9342		-19.9226	-7.67219
		12.3049	-29.5977	-5.92105		-19.9119	-24.4444
		-14.9039	-1.90476	-5.92105		-19.9056	-19.883
		-8.05989	1.66667	-5.91284		-19.8864	32.7941
		-0.0815244	-12.2115	-5.88235		-19.8783	8.19068
		-5.19736	-16.4041	-5.87722		-19.8723	22.2571
		-20	-1.45279	-5.83333		-19.8565	1.69671
		23.6767	-8.34868	-5.80581		-19.8413	10.783
		-3.26528	22.4359	-5.79937		-19.7802	5.57173
		-16.0662	-33.3333	-5.7725		-19.7531	-2.17241
		-8.24176	-8.60364	-5.75758		-19.7062	-9.21548
		-0.706751	-18.8419	-5.70175		-19.697	-35.7143
		10	-3.85023	-5.69106		-19.6806	7.33333
		-20.4788	-7.28224	-5.68182		-19.6154	-21.4286
		2.22222	2.85714	-5.66488		-19.6065	1.28205
		8.80615	6.27706	-5.63035		-19.5804	22.1053
		-13.4583	-7.85985	-5.598		-19.4847	9.46197
		-7.03042	-37.2237	-5.59211		-19.4444	1.7094
		-5.01836	10.6844	-5.57276		-19.4444	25
		-5.46785	-4.63283	-5.55556		-19.4073	4.7619
		-8.9238	17.9651	-5.55556		-19.4001	10
		-14.8148	34.6154	-5.55556		-19.3888	-31.8182
		-6.06061	-20.0669	-5.51378		-19.3741	10.1488
		-12.693	19.1516	-5.48387		-19.3421	24.5
		2.38095	47.619	-5.40541		-19.3333	-3.44133
		-0.903226	-7.54065	-5.323		-19.3196	7.09666
		14.4444	-6.27894	-5.31971		-19.305	-2.08333
		-7.78653	-8.37237	-5.30303		-19.2782	-18.3333
		-26.9231	-5.41958	-5.30303		-19.2698	-7.74973
		5.19481	-4.10046	-5.28846		-19.1759	8.33333
		1.65631	0.531915	-5.27859		-19.1739	-2
		0	0.142496	-5.27778		-19.1434	-6.87516
		0.825397	-10.5263	-5.26316		-19.0981	17.1429
		-12.5128	-6.2879	-5.2066		-19.0476	8.31027
		0.94086	-5.30303	-5.18753		-19.0415	0.474383
		5.55556	-10.0056	-5.17007		-19.0323	0.345224
		-6.66667	-4.25963	-5.16129		-19.0017	-19.1176
		-8.33333	10.0543	-5.11364		-18.927	1.42857
		8.68673	9.37002	-5.07591		-18.8488	8.23293
		-4.04762	0.0620522	-5.05035		-18.8235	11.1946
		3.12191	18.8515	-5		-18.7967	-1.21212
		-1.16974	-1.71344	-5		-18.7686	-14.2857
		31.8182	11.8103	-5		-18.7565	10.9091
		-6.69917	-2.5	-5		-18.75	25.8808
		-5.69853	4.06213	-5		-18.7442	-0.396825
		5.39939	3.48039	-5		-18.7162	13.7255
		0	-1.11111	-5		-18.6869	6.46443
		5	11.8333	-4.9913		-18.6832	36.3636
		-7.0504	-10.1496	-4.98602		-18.6818	-3.77976
		-10.7711	13.2943	-4.96829		-18.6813	-0.396825
		0.785378	0	-4.93191		-18.6553	1.4881
		9.64052	31.6667	-4.92424		-18.6518	-22.1562
		-4.47368	-35.71	-4.91453		-18.6364	-12.0879
		-5.30075	0.271929	-4.90155		-18.6156	-14.5455
		-14.3961	-3.6036	-4.90037		-18.5714	-5.23433
		-1.64131	0	-4.8814		-18.5714	17.033
		-4.31373	-9.63507	-4.86443		-18.5714	10.5402
		-1.0989	-4.27365	-4.85893		-18.556	12.1212
		-18.5185	-5.393	-4.84848		-18.5557	-14.2308
		-17.7305	-4.86339	-4.80769		-18.5357	-16.4251
		-14.7619	2.82051	-4.80368		-18.4961	-9.4076
		3.37838	16.5881	-4.7619		-18.4691	7.36842
		30.8333	0.686499	-4.7391		-18.4524	0.260926
		-25.6708	-4.17832	-4.72527		-18.4211	-1.2558
		6.95971	5.82707	-4.70588		-18.4024	6.89746
		-1.31579	-0.116279	-4.58333		-18.3824	4.38095
		-6.08049	1.97745	-4.57393		-18.3761	-25.974
		22.3546	-6.06061	-4.57161		-18.3333	28.1859
		-16.3399	10.1626	-4.54545		-18.317	1.06488
		2.30263	12.9303	-4.54545		-18.3117	6.875
		-57.0858	-17.9545	-4.54545		-18.1818	-5.4092
		-51.5152	0.476372	-4.54545		-18.1818	45.0311
		4.43243	1.67411	-4.54545		-18.1818	5.0566
		3.0303	1.55678	-4.54545		-18.1818	11.8421
		-5.64103	-1.3494	-4.52489		-18.1818	0.673401
		3.2983	7.52411	-4.51128		-18.1192	21.3675
		0.274725	-1.96961	-4.49718		-18.1167	-2.89943
		18.1818	-6.9886	-4.46429		-18.112	4.16667
		0.656371	5.70175	-4.44763		-18.0952	-0.063328
		4.16667	8.27068	-4.44444		-18.0672	1.80328
		14.0351	-3.18663	-4.39563		-18.0521	8.82353
		1.38319	0	-4.25382		-18.0117	-4.82456
		-4.90662	-5.80308	-4.22833		-17.9987	5.98361
		5	10.2451	-4.16667		-17.971	22.4916
		8.84615	2.22892	-4.16667		-17.927	16.6667
		3.76812	22.0109	-4.09357		-17.9131	10.2273
		0	2.63158	-4.09091		-17.8743	-13.3333
		-33.6491	-6.94283	-4.06699		-17.8571	3.50404
		3.47395	-1.70476	-4.04858		-17.8571	-26.9231
		9.08231	2.08333	-4.0404		-17.8309	16.4336
		2.96547	-15.3858	-4.03537		-17.8295	-42.8571
		3.91363	-6.3689	-3.87113		-17.8249	-35.4167
		15	11.925	-3.84615		-17.8013	21.3793
		5.40541	10.7143	-3.84013		-17.7839	2.5667
		-24.1516	34.7339	-3.8212		-17.7778	-4.7619
		-15	-6.06289	-3.78788		-17.7721	1.33929
		0	-11.5637	-3.78151		-17.7556	-25.9637
		1.29808	37.5	-3.78151		-17.755	7.26341
		-5.33126	-10.6098	-3.75822		-17.7548	-4.51369
		10.3448	-1.49584	-3.64551		-17.6959	-2.51716
		-4.78927	-9.61005	-3.64372		-17.6853	-10.7692
		48	-4.71761	-3.63248		-17.6744	-4.0293
		-7.69231	-17.9314	-3.58974		-17.6724	7.37156
		23.0994	-0.762192	-3.58589		-17.6724	17.8571
		-15.4298	-10.957	-3.42056		-17.6704	3.40576
		20.9091	7.90814	-3.37838		-17.6684	3.0303
		28.853	-5.74232	-3.34975		-17.6573	3.50978
		4.5568	4.99648	-3.34119		-17.6364	9.04977
		-7.77778	1.42857	-3.33333		-17.6364	-2.11517
		-1.10878	4.80087	-3.33333		-17.6316	-12.7976
		8.89334	3.45679	-3.33333		-17.6255	19.697
		5.93318	-4.62569	-3.33333		-17.6136	36.6667
		3.11987	-5.28846	-3.24324		-17.5595	5.18668
		23.3333	30.632	-3.20513		-17.5439	15.4135
		-33.3577	2.22222	-3.1746		-17.5084	78.5714
		10.4396	1.33333	-3.16554		-17.5	-10.2564
		-11.6913	-10.7305	-3.15735		-17.5	-0.79562
		14.375	-4.28703	-3.125		-17.5	16.6667
		2.01115	-31.9087	-3.0303		-17.4737	25.3561
		-2.44866	-3.90449	-3.01659		-17.4528	2.87481
		9.375	-7.48663	-3.01455		-17.4419	5.37186
		-11.4141	-13.3133	-3.00654		-17.4359	2.90323
		5.65217	3.96825	-2.99791		-17.429	-28.5714
		-9.31373	12.6984	-2.85714		-17.4208	3.05261
		-6.0149	40.8081	-2.83333		-17.3797	22.1747
		-5.14286	-29.7203	-2.81863		-17.3246	3.0303
		-5.95334	-4.48523	-2.77778		-17.3077	5.04349
		-11.0609	3.64706	-2.77778		-17.3077	7.16761
		6.66667	5.52696	-2.74607		-17.2949	13.4213
		-20.8333	-4.03361	-2.66667		-17.2917	-0.0835946
		0.0595013	1.26582	-2.5974		-17.2757	-3.34148
		-18.3077	5.71429	-2.57353		-17.2619	-6.45793
		2.88462	0.372966	-2.5641		-17.2269	-3.35269
		-71.5982	-18.8552	-2.52525		-17.2241	-4.44444
		-37.2159	-6.19048	-2.47678		-17.2093	-4.56392
		-1.78311	-3.44828	-2.43742		-17.1429	-9.23913
		33.3333	-5.08475	-2.33918		-17.1196	-7.92839
		-3.00752	-0.261324	-2.32959		-17.0614	18.3398
		-3.26279	6.34921	-2.32384		-17.0588	-4.43652
		-21.064	25.9684	-2.26244		-17.033	-5.96969
		10.4396	4.92068	-2.18227		-17.0232	2.87081
		-16.6225	-0.0668337	-2.14376		-17.0186	-5.29101
		18.75	-6.67634	-2.14286		-17.0161	-33.3333
		-42.8571	-5.1495	-2.12766		-16.9643	19.1317
		11.2554	-5.57717	-2.10811		-16.9589	6.41026
		-2.0991	0.934671	-2.10407		-16.9454	-16.9697
		-1.39257	23.8095	-2.08333		-16.9231	13.0682
		-2.14247	4.44444	-2.08333		-16.8984	-5.09204
		-26.0606	-8.38015	-2.06094		-16.8976	-7.0752
		-1.43861	-1.81682	-2.03209		-16.835	3.61039
		9.82906	-25.4244	-2		-16.8081	-11.5903
		13.9601	-12.1093	-1.98851		-16.8027	-4.33692
		-30	-2.33151	-1.97167		-16.7942	3.33333
		2.32281	-0.884089	-1.95246		-16.7874	2.48628
		15.9091	-0.531571	-1.94932		-16.7812	17.3998
		5	-34.4444	-1.92166		-16.7702	0.555556
		-2.32558	-12.5541	-1.89394		-16.7059	-13.7143
		14.8598	1.90476	-1.8797		-16.7059	-4.52897
		9.94152	11.3078	-1.8722		-16.7012	-5.18892
		-5.85586	7.26817	-1.84211		-16.6667	1.77991
		6.16567	3.83348	-1.80276		-16.6667	0.497025
		-11.5263	19.3827	-1.78571		-16.6667	11.8227
		5.2795	1.79108	-1.78571		-16.6667	-7.79221
		7.45357	-0.0873403	-1.77809		-16.6667	-7.42025
		5.26316	4.46547	-1.70279		-16.6667	4.31894
		7.45614	-0.582751	-1.68067		-16.6667	8.98819
		5.76087	11.4836	-1.66667		-16.6667	-7.31982
		5.38422	13.2432	-1.56087		-16.6667	-1.2462
		-5.08475	-19.4872	-1.53846		-16.6667	3.14286
		-22.6007	-31.6239	-1.53846		-16.6667	-9.52381
		-2.0021	-1.11449	-1.51515		-16.6667	-15.7999
		-2.66667	21.5385	-1.45849		-16.6667	-6
		-4.91539	-4.79597	-1.38889		-16.6452	5.97826
		1.40845	-8.57404	-1.30252		-16.5992	13.9394
		-2.36025	-3.92943	-1.25727		-16.5936	1.71429
		-0.727273	15.051	-1.25483		-16.5836	6.45492
		10.2767	-3.49147	-1.21212		-16.5692	-10
		9.52381	-0.478002	-1.19487		-16.5595	-15.4892
		-3.02419	-11.1111	-1.18526		-16.5414	2.72343
		4.28571	-2.5584	-1.17647		-16.4662	-57.1429
		6.97674	9.09091	-1.12967		-16.4502	-5.80933
		-3.22581	2.69327	-1.12045		-16.3793	-2.63158
		5.6574	-4.34243	-1.02439		-16.3686	-6.06061
		9.35905	10.119	-0.941864		-16.3573	6.94444
		-13.4063	-22.5564	-0.92947		-16.3462	-13.5
		-16.4146	14.2857	-0.909091		-16.3094	-12.8018
		-8.57143	19.5332	-0.879227		-16.3007	-8.54863
		11.336	1.13636	-0.859141		-16.2963	3.85281
		5.56505	11.1111	-0.793651		-16.2626	7.69231
		-4.41176	24.9417	-0.769231		-16.2366	-2.84539
		-22.4947	19.8511	-0.744048		-16.2266	-6.20994
		0.656566	11.1111	-0.739958		-16.2207	-0.574713
		4.33566	-15	-0.714286		-16.21	-16.4736
		11.7762	10	-0.699301		-16.1943	-1.05581
		21.3904	3.47826	-0.689655		-16.1854	-18.5507
		3.14912	8.16993	-0.681818		-16.1364	-19.0687
		2.24359	-0.714286	-0.661704		-16.133	-3.50121
		5	3.62384	-0.640861		-16.129	4.01284
		-1.36752	-0.444444	-0.621741		-16.1262	-4.33722
		3.06905	3.25203	-0.601422		-16.1111	3.27744
		8.88889	-0.446493	-0.530223		-16.098	-28.0936
		-1.83486	3.125	-0.444444		-16.0131	-6.66667
		0	-7.77778	-0.43592		-15.9524	-0.244584
		-0.273723	4.17001	-0.416667		-15.942	-14.751
		0	0	-0.36036		-15.9159	-1.34966
		-1.93237	-10.9091	-0.350877		-15.903	12.1802
		3.7037	-22.0855	-0.322581		-15.8654	-2.43278
		-3.7037	-13.0482	-0.25082		-15.8641	-17.1914
		-33.3333	-1.13321	-0.233298		-15.8148	-8.23813
		-5.55556	-16.9194	-0.206897		-15.7895	-2.37154
		2.54047	20	-0.189753		-15.7785	9.69388
		-3.65115	17.0635	-0.168946		-15.7576	10.7692
		-6.61765	25.2929	-0.164204		-15.7191	-6.95775
		4.80171	-1.66667	-0.137931		-15.6985	-8.69789
		13.7508	-4.80814	-0.0877193		-15.681	-2.79744
		4.72369	27.5132	-0.0420168		-15.613	-20.5882
		4.60526	7.93651	0		-15.5966	-12.253
		-6.36205	17.8261	0		-15.5914	-1.8711
		8.76575	-3.48113	0		-15.5844	-0.89001
		0.139664	-16.0784	0		-15.5844	3.06569
		-2.86524	-3.2591	0		-15.5556	6.36277
		2.19844	11.8881	0		-15.5556	-4.86313
		14.2857	-12.963	0		-15.5493	-18.8209
		8.78084	9.60452	0		-15.54	-9.28571
		3.19549	2.44755	0		-15.4839	15.7724
		7.84314	10.0962	0		-15.4762	3.77731
		-2.17075	0.886899	0		-15.4615	23.7452
		5.40254	-0.980392	0		-15.4545	8.37209
		-19.1732	10	0		-15.3846	-6.59027
		0	-16.2963	0		-15.3846	1.53846
		-8.79703	9.95733	0		-15.3846	11.81
		4.16667	37.5	0		-15.3846	15.0886
		-13.4868	-11.9281	0		-15.3605	-27.037
		7.57481	8.18859	0		-15.3589	-10.0675
		-12.1124	0	0		-15.3571	-1.07778
		-38.0952	2.77778	0		-15.3358	3.22572
		-11.4545	-3.84645	0		-15.3333	-0.356506
		33.6842	24.8689	0		-15.3079	-9.41991
		24.9428	1.25	0		-15.2893	3.36606
		16.8981	21.3921	0		-15.2842	-4.11301
		0	35.3965	0		-15.2532	-25.3681
		2.37296	31.016	0		-15.2381	1.04868
		-7.70264	4.7619	0		-15.2225	1.10229
		-3.57218	2.2122	0		-15.2174	1.1249
		-0.900901	1.79133	0		-15.2174	-4.50105
		-18.4253	5.17241	0		-15.2123	1.2292
		8.59905	6.68896	0		-15.1918	-0.578285
		-3.125	8.2996	0		-15.1515	-1.48518
		-18.254	1.95035	0		-15.1515	1.64443
		22.7907	1.81488	0		-15.1489	8.96283
		18.0556	-21.3904	0.115207		-15.1423	4.76943
		-10.7711	0	0.12218		-15.1232	15.0576
		23.0769	3.75375	0.134409		-15.103	3.02394
		-17.1329	7.94118	0.225225		-15.0915	-1.12569
		-1.1577	-9.09091	0.238095		-15.0585	-2.80083
		0.641026	8.49061	0.324675		-15.0173	22.5556
		5.125	-4.94505	0.384615		-15	-13.3333
		2.09188	-13.5833	0.389864		-14.9834	-1.02916
		-0.087108	4.91803	0.416667		-14.9798	0.900491
		-11.5385	-0.364372	0.425616		-14.9689	-6.01681
		-4.54545	-25	0.439883		-14.9611	3.23529
		-22.6437	-4.87805	0.506757		-14.9541	8.92857
		-7.61905	0	0.512821		-14.9474	-0.978286
		0	-8.27068	0.516224		-14.9412	13.3102
		0	1.68904	0.539867		-14.884	43.75
		-21.1184	0.202156	0.544465		-14.8718	-4.296
		-2.81886	-12.0978	0.55371		-14.8684	36.6667
		13.2206	34.6154	0.572082		-14.8649	14.5645
		-2.0771	-7.07071	0.62954		-14.8325	3.39378
		9.45946	16.9059	0.631579		-14.8213	2.08787
		16.3462	0.847458	0.641849		-14.819	-4.35606
		-0.0481577	13.6667	0.681342		-14.8148	14.2857
		0.428059	0	0.714286		-14.7817	10.1077
		-2.79204	-13.3333	0.757576		-14.7813	2.77778
		6.09362	10.5415	0.757576		-14.7727	-16.6667
		-0.244337	5.95238	0.769231		-14.7682	9.52381
		-1.06687	8.33333	0.790816		-14.7608	-13.2683
		-2.35043	-1.51515	0.892857		-14.7186	9.38936
		1.52941	7.69231	0.895141		-14.6916	0
		-4.33802	1.5873	0.925926		-14.6819	9.38313
		0.302316	-12.716	0.952381		-14.6429	32.5321
		-8.03571	16.6667	0.98133		-14.6331	0.320941
		9.90712	8.3208	1.0101		-14.6106	2.32051
		3.53129	-1.15773	1.04895		-14.6061	-8.69565
		-5.42636	0.499667	1.05263		-14.5839	-18.8571
		2.32704	0	1.06952		-14.5767	14.8649
		6.54102	5.46574	1.07527		-14.5725	1.66667
		14.8607	-5.71429	1.0989		-14.5455	-30.9091
		6.66667	-2.66106	1.10565		-14.5443	-8.57143
		2.77998	12.4282	1.12546		-14.5038	-22.1689
		0	0	1.17124		-14.4902	11.3137
		-13.3333	9.45378	1.19048		-14.4867	1.08333
		7.45968	-40.9181	1.21457		-14.4789	4.86124
		-20.5387	-3.89785	1.25313		-14.4608	14.3098
		-3.38346	5.46511	1.33333		-14.4338	-3.41944
		14.4444	17.5824	1.33709		-14.3939	38.8889
		17.0455	26.3889	1.36364		-14.386	13.6646
		-5.26316	-17.5459	1.42715		-14.3849	-8.92857
		-9.23363	34.6154	1.47059		-14.3651	7
		4.27673	4.7829	1.4881		-14.359	-14.6825
		-4.11164	-3.6855	1.52759		-14.3564	-10.7105
		0.0705467	3.59777	1.56348		-14.3317	-17.5744
		-4.39755	-6.81818	1.66667		-14.3073	12.5152
		23.4329	0	1.66667		-14.3052	-4.88095
		-9.62328	-1.20573	1.71296		-14.2915	9.28484
		9.68523	17.2131	1.75		-14.2857	-3.15932
		2.73314	-0.271739	1.77187		-14.2857	7.88434
		-1.86335	8.0721	1.80488		-14.2857	2.64206
		-3.84615	-18.2149	1.81818		-14.2857	19.0525
		-9.13926	-8.57143	1.82416		-14.2857	3.56938
		-6.54326	60.6811	1.84874		-14.2857	11.7058
		-16.6667	3.1733	1.85366		-14.2857	-2.38095
		-3.33333	3.87205	1.88588		-14.2461	-1.81643
		-10.6098	16.2268	1.89125		-14.2193	-5.29412
		0.742292	-2.47777	1.89492		-14.2104	-21.4286
		-9.09471	-27.7778	1.90476		-14.2079	0
		-2.68844	2.058	1.92308		-14.1732	5.89942
		-23.7844	6.02701	2.02698		-14.165	22.0779
		-0.388758	-12.1975	2.08333		-14.1453	-6.26718
		-8.18182	7.88177	2.08333		-14.1414	-13.6158
		-4.0724	12.7273	2.125		-14.111	8.57143
		8.55322	4.66859	2.18295		-14.1019	15.9674
		-0.42735	23.9316	2.23684		-14.0903	-20
		-2.63757	7.12202	2.29885		-14.0504	-6.62651
		-9.88104	5.80357	2.37805		-14.0461	-17.9167
		0.543814	3.02496	2.38095		-14.0191	0.586941
		7.81235	34.1858	2.38095		-13.9394	-14.0351
		20.5623	-2.75	2.38095		-13.9315	9.06244
		-11.7647	9.72222	2.38095		-13.9098	-25.5754
		10.3912	-1.75158	2.38095		-13.8918	-16.6667
		-24.2424	7.41688	2.38727		-13.8889	-12.1429
		-20.0617	11.9922	2.40385		-13.852	7.94335
		1.64904	7.44048	2.42537		-13.8499	9.34066
		0.218945	0.211409	2.43902		-13.8462	7.97872
		25	0.657335	2.5		-13.841	-6.36015
		-2.95508	4.69298	2.55453		-13.805	52.381
		4.5186	5.38462	2.57353		-13.7931	52.381
		-18.3333	-6.29371	2.59844		-13.7923	21.2121
		-1.42343	-12.9291	2.6081		-13.7736	2.17698
		-10.1449	4.60526	2.63158		-13.75	-6.5666
		1.51515	4.46487	2.63158		-13.7273	16.6667
		-22.1719	-26	2.66667		-13.7255	-23.3333
		19.697	6.25	2.67857		-13.7143	15.8452
		5.42265	-14.9315	2.7027		-13.705	-4.95094
		-6.63616	1.15732	2.71739		-13.7043	-7.07364
		-18.0357	-13.8528	2.72727		-13.7024	35.3282
		-9.72222	2.62865	2.73834		-13.6752	1.27839
		-14.5299	37.6566	2.81385		-13.6364	-2.60274
		-2.85714	6.93112	2.83976		-13.6364	-9.30569
		7.22284	29.4872	2.89954		-13.6302	6.21531
		15.873	-2.96349	2.91925		-13.6264	21.8487
		18.75	-37.5	2.99539		-13.5962	8.80297
		6.34921	22.619	3.01724		-13.5938	4.68405
		-25.2101	-11.6803	3.02198		-13.5897	-10.7143
		-2.10096	4.2804	3.0303		-13.5463	6.54762
		1.79282	-1.32739	3.0303		-13.5417	13.964
		8.52273	-7.16893	3.07692		-13.5331	-10.2273
		8.88031	-1.24489	3.1106		-13.5328	-0.62921
		2.48099	-10.7655	3.11493		-13.5294	6.50888
		-7.29313	8.73016	3.1746		-13.5057	36.2821
		3.22581	-0.0367613	3.18949		-13.5055	27.3109
		-10.8691	3.7037	3.23232		-13.4973	70.3704
		2.05479	1.21058	3.26087		-13.4921	-3.11734
		5.53054	1.95914	3.31825		-13.4884	-18.5714
		-1.25	7.57576	3.32049		-13.4675	72.3077
		8.52273	-13.3333	3.33333		-13.4503	2.85714
		27.1429	4.81728	3.33333		-13.4352	8.82048
		2.04678	1.5365	3.33333		-13.4269	9.35472
		-0.612245	-0.420561	3.33851		-13.3971	0
		-13.2043	-3.94737	3.56522		-13.3621	9.61538
		-2.8046	14.1026	3.57143		-13.3333	0
		-43.443	11.7452	3.57895		-13.3333	8.59488
		-2.08333	0	3.58056		-13.3333	9.27602
		-4.34783	-0.0827383	3.59601		-13.3178	7.83444
		-25	25.7174	3.63372		-13.3089	-0.833333
		6.25	69.5652	3.63636		-13.2855	5.96462
		4.48718	16.2005	3.68421		-13.2778	2.5974
		-6.57895	13.0952	3.69118		-13.2723	36.9748
		21.9048	7.73905	3.78788		-13.2403	-15.9259
		-19.4228	2.17865	3.78788		-13.2323	22.1127
		-31.891	-6.32466	3.78788		-13.2271	4.49064
		-5.28736	22.7381	3.81818		-13.1667	-7.7193
		1.78571	-6.61578	3.84615		-13.1579	-0.579436
		-14.2857	11.0876	3.89016		-13.0952	12.0879
		-7.09447	-3.33333	3.96825		-13.0952	-13.3707
		-6.94444	-1.60741	3.98268		-13.0936	-4.55072
		26.7532	0.304016	4		-13.0769	15.9617
		6.15185	-4.2618	4.0293		-13.0747	13.4561
		12.1212	-1.25822	4.16667		-13.0435	2.28152
		4.7619	-11.646	4.16667		-13.0374	2.25564
		-3.75	27.668	4.16667		-13.0306	-18.1818
		-19.5987	24.5192	4.18354		-13.0221	-25
		0	-30.3922	4.25411		-13.0221	-17.9207
		-6.37681	6.97674	4.31479		-13.0076	-9.68421
		3.93519	-9.52381	4.34783		-13.0018	10
		-21.6667	11.101	4.35534		-12.9927	9.64912
		2.73713	-5.69025	4.37596		-12.9892	13.3117
		-8.71943	4.75228	4.39655		-12.9765	-10.9513
		-16.6667	2.09676	4.45344		-12.9715	-3.94151
		-7.12074	-3.16602	4.47542		-12.9655	-6.65283
		-4.84848	13.5338	4.50803		-12.9571	7.67427
		2.37154	6.70023	4.58404		-12.9412	5.08603
		43.6364	4.31034	4.62185		-12.94	16.0428
		0.801282	-31.3706	4.65244		-12.896	0.381971
		-1.45985	7.6489	4.74138		-12.8938	-3.10078
		5.22876	3.65385	4.7619		-12.8749	-21.9298
		-1.46341	36.112	4.7619		-12.8687	26.6667
		-12.5	0	4.77786		-12.8609	24.2424
		0	17.2727	4.78437		-12.8445	-0.609756
		-1.27119	3.06365	4.78785		-12.8427	12.6755
		2.41347	4.8951	4.79488		-12.8342	-20.6322
		-0.0976828	8.88889	4.8583		-12.814	-22.5198
		34.108	-6.33053	4.90196		-12.8118	33.3333
		15.4278	7.0435	4.98646		-12.8023	17.2878
		-1.30723	0	5.10358		-12.7982	0
		-5.58161	-2.49975	5.11364		-12.7949	0.714286
		7.69231	0	5.11788		-12.7712	-5.67515
		30	5.70652	5.12821		-12.7273	0
		5.45617	3.7037	5.19481		-12.6847	-9.42736
		-4.61483	0	5.24476		-12.657	50
		10.0872	19.4444	5.39829		-12.6431	-0.700809
		-0.4095	0	5.41265		-12.619	25
		-41.3736	8.4988	5.42328		-12.605	-0.16129
		3.89854	-1.90916	5.48387		-12.5979	5.75856
		-10.6719	5.14706	5.4902		-12.5874	-6.8101
		16.6228	-1.2375	5.55556		-12.5736	7.6087
		10.9091	-4.64646	5.56285		-12.5602	-3.43085
		-5.25131	-4.88172	5.59441		-12.5046	-9.31851
		-2.14921	1.72759	5.61691		-12.5	14.3275
		-4.7619	-8.37071	5.67956		-12.5	31.8627
		2.37336	-4.94987	5.71659		-12.5	3.34948
		0.754379	0.0552768	5.72082		-12.5	-8.39161
		1.01215	6.14145	5.72641		-12.4965	-10.4167
		9.09091	0.354887	5.74163		-12.4863	1.02499
		2.72989	-1.70181	5.83139		-12.4658	-18.9744
		0.986741	13.1681	5.88235		-12.4577	3.61956
		12.64	-43.0556	6.04396		-12.4459	-7.22222
		-6.62438	38.4314	6.06061		-12.4224	0
		-4.48718	-6.08223	6.06061		-12.381	1.53257
		-2.79675	1.83824	6.12648		-12.3737	-7.84615
		-53	5.46448	6.13811		-12.3404	1.55211
		-2.08333	-0.32789	6.15385		-12.3377	8.55856
		-21.1232	0	6.15385		-12.327	-6.06061
		-15.5569	-8.06938	6.17849		-12.3077	39.4022
		-3.40909	-25	6.21661		-12.3013	3.33333
		8.97436	-2.08333	6.25		-12.2762	28.0543
		-8.06452	4.30017	6.25		-12.2713	-43.4343
		3.81098	-12.6559	6.25		-12.2685	25
		-1.77778	-7.11462	6.25874		-12.2667	7.1105
		11.1111	-38.0952	6.26118		-12.2666	20
		4.81481	-13.3903	6.29371		-12.2222	10.1087
		-18.254	-8.75	6.31579		-12.1951	5.07246
		-18.3761	-1.60611	6.33674		-12.1708	30.5882
		1.62602	-2.84314	6.37255		-12.169	2.81065
		-2.07612	-5.08798	6.54378		-12.1625	19.7802
		12.605	-20.5087	6.58307		-12.1365	44.4444
		15.8249	-11.142	6.63082		-12.0978	39.881
		0	-3.7605	6.66667		-12.093	6.20072
		2.2409	-0.422297	6.66667		-12.0833	20.4545
		15.496	2.52525	6.66667		-12.0833	8.36951
		-19.7917	-14.482	6.67075		-12.0833	-7.40741
		21.3904	10.3175	6.68757		-12.069	-1.09602
		-0.385263	-5.15952	6.72269		-12.0686	35.7143
		-1.18176	15	6.76692		-12.066	13.2439
		-0.573813	2.5641	6.76692		-12.0553	13.9706
		22.2527	-9.64511	6.79487		-12.037	23.5294
		-6.32411	0	6.8323		-12.0359	12.8571
		4.62185	3.13957	6.88259		-12.0046	-1.40868
		-0.833333	3.125	6.90087		-12.0024	10.6061
		2.66667	4.76392	7.00283		-12	2.89896
		0	0.886918	7.01581		-11.9877	26.8627
		-1.72811	-11.5385	7.08075		-11.9621	24.1667
		-1.19048	-4.54545	7.14286		-11.9237	-13.4615
		-2.99145	0.290758	7.14286		-11.9048	0.872093
		-34.0909	11.5987	7.18391		-11.9048	30.1429
		-20	14.5098	7.24138		-11.9048	15.3745
		-18.2701	9.57918	7.24638		-11.9048	29.7143
		-1.5873	0	7.29316		-11.9048	55
		-8.52273	0	7.37179		-11.9048	6.57952
		-13.6842	-5.56818	7.37327		-11.871	7.95734
		-3.32014	-2.946	7.38916		-11.8393	-37.2004
		16.2602	10.1989	7.45098		-11.8217	-40
		26.3427	13.1868	7.46753		-11.7398	43.2281
		18.254	-7.61278	7.48663		-11.7353	7.69231
		-8.20054	-11.8195	7.48718		-11.7216	-16.9282
		-17.6923	-15.5405	7.5188		-11.6883	51.9608
		3.85965	3.67647	7.56303		-11.6873	18.6508
		-5.10033	-5.33674	7.58836		-11.6741	12.1849
		0.584416	4.12165	7.64212		-11.6667	1.19048
		5.82633	8.73111	7.73026		-11.6667	-9.16667
		-34.2949	-12.8205	7.76398		-11.6522	-1.8315
		-30	-6.39029	7.77778		-11.6477	62.0879
		15.3061	-6.26506	7.84131		-11.647	-1.7199
		-10.2857	1.12725	7.84314		-11.6408	0.325203
		-21.9697	26.3034	7.84553		-11.6279	-0.177384
		16.9935	-1.55678	7.86325		-11.6279	-7.51141
		-26.1619	-7.67164	7.89474		-11.6232	-12.9537
		-7.03934	0.716838	7.89474		-11.6162	46.6667
		-13.468	0.240012	7.89474		-11.6058	11.6667
		8.79121	-4.36749	7.91304		-11.5942	55
		2.28833	1.28902	7.91667		-11.5766	-0.132626
		-6.20843	15.5462	8		-11.5693	0
		-0.0438789	-11.0842	8		-11.5385	34.543
		4.26123	15.0495	8.01724		-11.5385	-2.23529
		0.931677	-7.3831	8.18951		-11.5152	-40
		-2.94118	7.93496	8.22222		-11.5	31.401
		0	13.9037	8.2996		-11.4961	-5.37259
		0	-5.12821	8.3004		-11.4846	5.88235
		25.7967	13.758	8.33333		-11.4839	6.40708
		9.61538	0	8.33333		-11.4509	8.74732
		7.12251	-11.4698	8.33333		-11.4144	13.7472
		-6.92476	-30.9091	8.33333		-11.3928	36.9963
		-1.11643	2.75689	8.33333		-11.3852	-31.8182
		-4.61538	21.9883	8.33333		-11.3636	1.80147
		-6.7616	-5.45455	8.33333		-11.3553	7.19697
		12.5751	11.4035	8.33333		-11.3393	-4.24898
		-11.5385	-0.307838	8.34915		-11.3254	9.09091
		-4.87805	12.8205	8.52273		-11.3095	8.7108
		10.4762	0.943396	8.53432		-11.2913	-6.66667
		4.50838	-6.18991	8.5431		-11.2865	-4.54163
		-1.64835	0.838115	8.54701		-11.2731	-1.23656
		-29.4686	5.65353	8.57384		-11.266	26.3736
		0.877193	13.0689	8.62579		-11.25	19.641
		2.72727	-12.3527	8.63158		-11.2347	-8.72033
		-3.16742	-4.60048	8.73563		-11.2295	-4.17582
		-7.58929	2.0306	8.79917		-11.2121	-0.621118
		19.4139	0	8.88889		-11.2	-44.1176
		-3.27869	23.3333	8.94661		-11.1842	6.06061
		27.5	0.280812	8.97436		-11.1842	78.9474
		-15.3846	-11.5116	8.99758		-11.1823	15.1515
		-16.0839	-7.77339	9		-11.1804	47.5
		-5.33333	24.4444	9.05923		-11.1801	7.74194
		2.38095	14.8664	9.09091		-11.1641	73.6842
		-4.23729	-2.84399	9.14046		-11.1538	-2.49595
		6.53021	0.544213	9.21212		-11.1493	-10
		-1.25	-18.8266	9.28571		-11.1129	-2.52313
		-4.48718	-15.3846	9.44444		-11.1111	-17.4603
		-15.8537	-3.65449	9.50549		-11.1111	-1.2987
		7.23077	6.54757	9.52381		-11.1111	13.369
		0	-11.897	9.52381		-11.1107	-4.3956
		-10.4762	11.3932	9.52381		-11.1096	56.0199
		-5.17722	-11.1038	9.54545		-11.1047	-8.49673
		11.2351	11.1111	9.57419		-11.0879	-10.6952
		-10	-21.7949	9.69697		-11.0603	26.6667
		-24.598	-3.19451	9.79021		-11.0357	12.3941
		19.1912	-3.61526	9.91471		-11.0151	0
		29.8077	-2.68199	9.98363		-11.0123	8.33333
		-7.7838	-4.89724	9.9839		-11	-39.1608
		7.45868	10.3248	10		-10.9887	10.0509
		12.5	21.3131	10		-10.9162	5.21759
		0.814404	4.12526	10		-10.9091	3.60048
		-5.05291	-1.77123	10		-10.9091	34.2105
		-4.54545	8.25175	10		-10.9091	7.85714
		-3	4.70554	10		-10.9023	-6.44975
		-15.3846	5.25748	10.087		-10.9023	7.14286
		7.14286	0.873016	10.0962		-10.9023	18.1652
		2.7027	-30	10.1587		-10.8974	-40
		-10.8429	-1.2348	10.2484		-10.8851	7.31651
		-0.769231	-2.17391	10.2564		-10.875	23.9919
		-1.46013	1.51515	10.3383		-10.8582	22.619
		-4.80163	1.60428	10.3448		-10.8314	0
		-4.51741	13.3333	10.3865		-10.8295	-3.33333
		12.3529	9.21212	10.4167		-10.814	2.9711
		-21.4286	-3.17523	10.5072		-10.8108	0.952381
		-5.14286	-5.05495	10.5123		-10.7527	0.694444
		-21.0526	-2.77778	10.5769		-10.7143	33.3333
		10.8696	2.40602	10.6754		-10.7143	-7.24138
		27.7778	11.9278	10.7143		-10.7143	8.61522
		0.153846	17.7249	10.7143		-10.7143	-5.4902
		0.355194	43.75	10.8187		-10.6665	35.7143
		3.46154	26.7267	10.8696		-10.6618	-8.00478
		-10.9091	34.8297	10.8753		-10.6414	-34.4444
		-0.555556	-32.8571	10.8893		-10.6306	-17.9487
		-17.8571	-8.18792	10.8974		-10.6155	10
		-23.6065	0.133696	10.9524		-10.6061	9.61538
		4.50928	16.5441	10.963		-10.5986	8.35928
		-1.40845	0.476948	11.0294		-10.5816	18.8225
		-1.18227	1.27807	11.0438		-10.5708	-2.70037
		2.41863	20.9677	11.0909		-10.5556	48
		-23.7968	-12.2807	11.1111		-10.5533	0
		15.1852	9.39394	11.1111		-10.5409	-0.694444
		-18.75	2.05479	11.1688		-10.5386	14.0351
		5.61905	7.74009	11.1888		-10.5263	-2.94118
		1.5675	-20.0397	11.2329		-10.5263	6.57143
		-0.669157	5.95238	11.25		-10.5263	-6.57895
		11.6228	-11.8421	11.2805		-10.5241	19.5324
		0	-26.6667	11.3636		-10.5195	16.6667
		-6.66667	24.3316	11.3636		-10.5108	80.9524
		0.257922	0.0374532	11.5385		-10.5042	9.77379
		3.92157	-14.5343	11.6071		-10.5041	-13.6364
		-20	7.35484	11.6541		-10.4955	18.4343
		0	45.9459	11.6586		-10.4895	5.72519
		2.22222	13.2979	11.6667		-10.4878	-4.05698
		-64.4444	25	11.6846		-10.4631	-4.70588
		-15.9091	9.11681	11.8056		-10.4541	39.1667
		-48.1944	2.5	11.9048		-10.4469	3.33333
		23.0792	-9.04578	12.069		-10.4167	-8.11688
		-2.67058	-24.026	12.0891		-10.4167	50
		-57.1096	33.75	12.1212		-10.4079	0.457317
		18.0778	15.7895	12.2157		-10.3841	-4.97288
		4.64286	6.37931	12.4487		-10.3629	5.86081
		-1.58378	-2.88462	12.5		-10.3448	22.8632
		-2.63889	15.7143	12.709		-10.3318	-10.7148
		-0.17094	-23.6601	12.7195		-10.3175	-25.9762
		9.09091	18.3007	12.7273		-10.3142	6.44444
		11.7647	24.8677	12.7473		-10.2941	-24.6753
		4.20168	3.2567	12.8205		-10.28	-46.6667
		-1.56472	4.94587	12.8571		-10.2564	3.84615
		-1.39444	-0.892857	12.9032		-10.2564	50
		4.75268	-14.0334	13.0435		-10.2343	-8.33333
		19.0476	18.6047	13.0736		-10.2326	11.0719
		2.17172	-1.92308	13.0952		-10.2151	-5.86124
		-62.5541	-3.33333	13.1177		-10.2148	7.93651
		-64.6154	0	13.2609		-10.2007	6.19048
		-75	-2.67857	13.3333		-10.1992	2.5
		-51.7652	-33.3333	13.3333		-10.1852	9.6211
		-2.91667	-0.849673	13.4594		-10.1756	20
		-22.4138	1.4722	13.4615		-10.148	0.236167
		0	-7.95455	13.4921		-10.1448	-12.392
		12.0083	18.7166	13.6364		-10.1217	-9.0404
		-27.972	0	13.6364		-10.119	32.3529
		-39.0026	8.9372	13.6364		-10.1123	31.5789
		-10.045	3.00847	13.6752		-10.1118	66.6667
		-28.8564	0	13.7352		-10.1027	13.5057
		-33.569	1.96078	13.7731		-10.098	2.50471
		-9.86842	25.1389	13.7755		-10.084	3.60923
		-90.9091	-0.177634	13.8889		-10.0752	0.123894
		-6.60606	-0.952381	13.8889		-10.0741	2.49688
		-8.97436	5.22876	13.8889		-10.056	4.95169
		0	0	13.9785		-10.0446	11.8421
		2.23325	-2.97203	14.0709		-10.0239	2.45464
		12.5	7.84314	14.0805		-10.0186	-10
		4.54545	6.25	14.1026		-10.0144	20
		9.09091	-3.29821	14.2857		-10.0094	25
		-1.90909	-1.12659	14.2857		-10	9.44056
		6.25	-15.1846	14.2857		-10	-3.33333
		9.45652	-3.45481	14.3939		-10	-0.350877
		1.25908	9.23077	14.5022		-10	22.6167
		-1.50376	11.7057	14.5455		-10	-1.24224
		11.6667	0.116931	14.5833		-10	40
		-19.1795	-3.88772	14.5833		-10	1.78571
		9.22619	-31.5508	14.5833		-10	-1.42857
		-8.27068	-1.45889	14.6104		-10	-9.15385
		5.7971	-0.397878	14.652		-10	30.8929
		-26.7311	-5.16098	14.6667		-10	10.7143
		-7.0028	4.7054	14.7059		-10	11.3636
		0	20.045	14.7339		-9.97386	13.3333
		-3.84615	6.98874	14.8178		-9.94549	25.4963
		-19.0581	-4.36404	14.8221		-9.93436	7.64479
		-11.1908	4.7619	14.8387		-9.93275	14.6347
		-10	-7.91226	14.9107		-9.92832	-1.23106
		15.2198	-15.7143	14.9425		-9.90783	-15.2343
		-5.34483	8.01034	15.0719		-9.87903	23.8095
		-10.2851	-4.38406	15.2015		-9.87224	-9.82143
		1.66667	-2.7027	15.2369		-9.8652	11.8012
		0.483092	-0.719424	15.2406		-9.86301	28.5714
		9.27318	2.0202	15.2497		-9.84848	46.4286
		-30.1681	36.8421	15.2778		-9.83966	0.816993
		-0.852273	4.92424	15.2778		-9.83411	37.2549
		-0.0223331	-1.14092	15.444		-9.83133	26.0638
		3.0303	2.95058	15.4499		-9.82143	15.1515
		-15.8974	-8.13953	15.4589		-9.81308	19.5028
		-5.93703	-1.66667	15.5678		-9.81191	16.0985
		-5.64263	-0.46443	15.625		-9.80392	-11.8788
		2.7027	-26.1628	15.7407		-9.78484	-4.97076
		28.0645	6.70045	16.0183		-9.77778	-13.491
		-10.5144	9.01515	16.0839		-9.77604	-9.79021
		-9.31713	-7.04042	16.1404		-9.77436	29.5789
		-3.22488	27.5	16.1765		-9.7561	11.1111
		0.766284	0.709497	16.3171		-9.75528	0.378788
		33.7662	-0.716846	16.4502		-9.74026	61.9565
		-6.57895	-3.27381	16.4744		-9.74026	10.2679
		0	-12.2353	16.6122		-9.72644	45.4839
		8.64644	8.04598	16.6667		-9.699	-7.9977
		-5.32115	-4.44444	16.6667		-9.69203	10.8108
		6.52174	-25.1462	16.6667		-9.68574	45.7143
		-51.1936	1.62602	16.6667		-9.66414	30.5556
		-20.2911	8.33333	16.6667		-9.61538	10.7317
		9.82644	-2.48892	16.6667		-9.61538	12.253
		1.11774	-12.395	16.6667		-9.59784	23.5577
		6.668	24.6212	16.6667		-9.58333	0
		-8.13397	0	16.6667		-9.58333	0.181488
		0	-3.51307	16.6667		-9.56522	11.5385
		51.8519	-0.191571	16.6667		-9.552	38.3333
		-10.2432	13.1529	16.792		-9.53129	3.78634
		-0.833333	-15.5908	16.8022		-9.52381	9.6748
		-5.43294	11.8881	16.8421		-9.50355	63.8695
		5.36437	-1.09555	16.8521		-9.49309	10.4083
		-22.7273	-12.7823	16.9173		-9.48333	-8.00654
		6.87994	-0.179802	16.9643		-9.447	2.01465
		11.8514	7.38095	16.9935		-9.44444	40.625
		4.0455	-12.2209	17.037		-9.43743	-2.45098
		-2.85037	-2.5	17.1053		-9.42918	25.4386
		6.55637	6	17.2414		-9.42788	7.57576
		9.29705	0	17.3524		-9.42742	8.77193
		4.33114	1.94805	17.4825		-9.41286	6.25
		-7.57576	32.1429	17.5		-9.41176	0.223214
		3.1746	11.6667	17.6471		-9.40479	2.04776
		10.7843	-22.7692	17.651		-9.38967	12.0693
		3.11813	0.0944377	17.7778		-9.375	12
		6.67519	-22.4242	17.8019		-9.375	5.12821
		14.5885	-30	17.8571		-9.35673	61.1111
		-1.60279	-20.1805	17.9487		-9.34635	3.33333
		-2.66317	-3.57143	18		-9.33333	-11.0039
		2.75619	8.00454	18.0307		-9.33333	1.66667
		4.375	10.4167	18.0835		-9.33333	-1.33333
		-7.77577	-11.1657	18.1481		-9.3257	13.8889
		-2.98969	-5.70953	18.1481		-9.30769	42.7193
		-20.5663	6.35674	18.1818		-9.29791	41.6667
		38.0952	40.4762	18.2609		-9.28304	-5.55556
		-9.30233	-2.11412	18.3284		-9.27972	27.1429
		15.2593	3.33333	18.3386		-9.27318	14.7059
		10	0.420757	18.3784		-9.2559	38.7255
		4.12022	-2.27273	18.3908		-9.25388	40
		-5.98105	11.2857	18.4783		-9.25285	19.1729
		-9.82244	14.5276	18.6434		-9.24765	6.66862
		15.3829	-2.0979	18.7302		-9.23077	-16.6667
		-2.5005	-10	18.8235		-9.23077	11.0119
		-4.37281	4.54545	18.8312		-9.22171	25.731
		6.19633	-15.9524	18.9189		-9.18972	40
		-0.70922	23.0769	18.9826		-9.18699	-17.8309
		-4.68448	-25	19.2048		-9.15584	0.526024
		-2.52682	2.17865	19.2308		-9.12088	9.09091
		0	-21.1462	19.2389		-9.11314	56.25
		-1.1583	-8.37862	19.2857		-9.10326	11.6237
		21.5385	-12.6374	19.2982		-9.09306	-10.9707
		15.4323	-8.48115	19.4118		-9.09091	29.1005
		17.827	-29.8113	19.697		-9.09091	3.15664
		9.7676	1.60204	19.7628		-9.09091	84.2105
		7.75463	-25.6917	19.9181		-9.09091	62.987
		-31.6993	0	20		-9.09091	38.0309
		-0.0604047	-20	20		-9.09091	-5.78157
		-25.4902	41.79	20		-9.09091	-3.91304
		12.2807	-9.61538	20.1139		-9.09091	-12.4498
		-3.23077	0	20.2381		-9.09052	8.54701
		-6.01162	-1.30719	20.2857		-9.06977	-0.526316
		14.7659	14.8148	20.3431		-9.06905	-0.199689
		6.24177	4.82361	20.3463		-9.06268	2.85714
		-0.143541	-5.01253	20.4545		-9.05971	30.7692
		-2.02399	-5.10149	20.5128		-9.03342	-8.13953
		6.79443	-0.742323	20.5357		-9.01857	3.29381
		-12.8571	-30	20.7143		-8.98618	-2.48918
		11.2844	-0.530223	20.7283		-8.97785	7.69231
		-2.82609	-8.67751	20.8829		-8.96482	-0.290062
		2.90061	-6.19048	20.8889		-8.95802	3.84615
		-5.34862	-6.39671	20.9091		-8.94411	-0.19795
		5.21708	3.27381	20.9524		-8.93617	13.4383
		3.22581	-3.57143	20.9719		-8.91304	30
		30	-70.0669	21.0526		-8.90805	25.5952
		13.8756	11.2621	21.0526		-8.90269	14.5614
		-2.31192	-15.7895	21.1839		-8.89815	7.57081
		1.82462	8.26087	21.4286		-8.88889	-30.4412
		9.72222	-10.8597	21.4286		-8.88889	29.1667
		-47.2222	-10.7143	21.6641		-8.88889	-33.9286
		-0.88757	-14.2857	21.75		-8.88777	-14.8252
		3.1701	7.69231	21.7593		-8.87446	-29.065
		4.28571	-3.27869	22.0779		-8.85795	3.33333
		2.63158	30.9783	22.1053		-8.85279	6.66667
		-25.772	0	22.2384		-8.8365	14.4444
		7.87971	-12	22.4265		-8.82483	-0.575448
		8.52826	-4.7619	22.4324		-8.82353	-0.21645
		17.0862	11.5385	22.5253		-8.80881	60
		-3.20048	-6.62768	22.6667		-8.7963	5.01406
		-11.3636	1.7803	22.7273		-8.78136	18.1917
		-3.91995	12.8462	22.9947		-8.76623	23.1867
		-3.22581	0	23.125		-8.7559	36.25
		-6.99248	5.45782	23.3333		-8.72657	20.6842
		2.0189	-12	23.3333		-8.71497	13.6364
		-18.1818	0	24		-8.69565	33.3333
		6.44183	-5	24.0385		-8.68491	14.5833
		-10.6667	-2.52525	24.2105		-8.68006	16.6667
		11.9231	3.72671	24.2424		-8.6794	-3.84615
		-2.61438	-12.7063	24.2754		-8.67133	17.4688
		-6.89655	-1.5625	24.2857		-8.66297	4.62963
		0	2.72727	24.3056		-8.65874	13.8249
		2.29312	-10.0339	24.4706		-8.65385	-10.142
		-8.867	19.8214	24.5161		-8.65385	14.086
		5.88235	-7.3913	24.5455		-8.65209	1.31414
		0	20.8791	24.5779		-8.64662	-1.07966
		0	-14.1667	25		-8.62291	10.1076
		19.4805	-5	25		-8.62084	8.92512
		19.8089	4.29733	25		-8.62069	-0.616313
		-7.07071	7.56765	25.2723		-8.59332	10.1786
		-6.6719	5.35714	25.4545		-8.58586	-0.672834
		-4.58333	18.8725	25.5556		-8.58065	72.7273
		5.88235	6.66667	25.7576		-8.57814	20.7792
		-1.52834	9.48353	25.974		-8.57411	34.5
		5.43339	-15.3846	26.0606		-8.57143	7.14286
		7.44768	-10.7009	26.1905		-8.57143	3.99091
		-14.1762	-14.3939	26.3736		-8.57143	-1.13445
		-6.56566	20	26.4856		-8.57143	1.47059
		-6.15385	-28.3333	26.8571		-8.57143	1.95724
		10.4167	7.14286	27.5735		-8.56695	-3.96646
		-16.4773	2.7027	27.6224		-8.56343	15.0909
		-25.2101	0.10154	28.2609		-8.55615	21.6667
		11.1111	-4.16667	28.7879		-8.54701	41.6667
		5.83407	13.9423	29.097		-8.54701	-2.3126
		1.0101	-2.52101	29.899		-8.54701	31.25
		-8.57143	18.1115	30		-8.54342	31.25
		0.757576	28.1846	30		-8.54232	-5
		42.8571	-28.3333	30		-8.52974	1.46552
		8.71795	-0.440984	30.5882		-8.52827	7.97448
		-12.7778	4.54297	30.8271		-8.50794	-4.33114
		-16.5517	13.0064	31.6667		-8.50493	-41.25
		-33.3333	4.57516	32.2344		-8.4851	1.474
		6.99301	0	32.8571		-8.48485	-3.57143
		6.37681	-40.2597	33.0357		-8.48485	-9.80114
		-33.3333	-23.0769	33.7255		-8.48131	-41.6667
		-52.7273	21.7172	34.065		-8.47458	-14.9123
		-3.64146	-17.4359	34.1991		-8.46883	-3.0641
		0	0	34.2308		-8.46154	-1.07843
		-7.93972	-6.11154	34.6154		-8.44444	2.5641
		-15.7895	7.21154	34.6154		-8.43179	56.8439
		-17.2612	13.6364	34.6561		-8.43137	14.898
		4.28571	-10.3846	35		-8.42491	-32.967
		-3.63636	-22.0588	35.8974		-8.42491	1.93976
		20.7692	18.8457	36.6667		-8.41503	-1.02564
		-4.41176	0	37.2727		-8.41256	-9.00563
		0	-22.3077	37.5		-8.3926	-2.48424
		0.905797	43.75	38.5		-8.38509	7.1934
		-12.2762	-6.45161	39.0476		-8.3652	92.3077
		-0.838169	0.60185	39.2045		-8.36432	-19.0476
		-18.1586	11.622	40		-8.35946	16.9355
		1.81818	9.62762	41.8182		-8.34329	5.88235
		0	8.62745	41.8182		-8.33333	1.65771
		-0.384025	24.0741	43.1034		-8.33333	4.16667
		1.93786	-2.08333	46.6667		-8.33333	8.42105
		0	8	46.9231		-8.33333	12.5
		5.45455	5.44095	47.7778		-8.33333	6.81818
		2.26244	-4.16667	48.2051		-8.33333	7.32143
		-64.8746	-0.119833	48.4848		-8.33333	-17.5046
		12.9424	10.8163	53.3333		-8.33333	4.72756
		5.55556	4.25865	53.3654		-8.33333	-5
		0	14.1711	60		-8.33333	-33.75
		-2.77778	10.7895			-8.33333	-5.447
		-4.11011	-1.66667			-8.33333	35.0877
		0	1.66667			-8.33333	-2.0979
		-16.0792	-1.28205			-8.33333	7.28745
		3.125	0.401338			-8.32315	2.40455
		0	3.92157			-8.31298	-25.4902
		-1.14351	21.6667			-8.29618	0.981405
		-11.9048	0			-8.29033	-2.99077
		-8.50932	-0.684262			-8.27785	41.9048
		-4.7619	-13.4752			-8.27452	12.9032
		-10.7143	1.60985			-8.27068	6.18132
		2.89655	12.7401			-8.22891	23.7762
		5.55556	2.22222			-8.21813	7.76335
		0	45.2381			-8.21661	-26.5217
		-9.50226	-19.0341			-8.20121	-29.8387
		0	-1.96182			-8.19775	2.40009
		0	-12.7976			-8.17333	7.95455
		-0.47619	5.70175			-8.17308	0.631131
		-6.55271	23.1348			-8.17308	2.22222
		-6.90909	21.6216			-8.16747	5.35714
		2.87473	-5.3122			-8.16561	6.66667
		1.19048	-8.11966			-8.16216	21.0474
		-29.1209	-1.05263			-8.15769	28.0722
		-6.31579	0			-8.15508	25.1192
		14.1874	-6.23373			-8.15217	-26.7991
		1.82328	7.30263			-8.15188	-10.2757
		2.1645	3.89036			-8.1496	-1.37845
		-15.1515	8.33333			-8.13159	-6.96345
		-6.47059	12.5			-8.13093	0.604748
		-2.94118	5.88235			-8.12666	44.7811
			-6.78733			-8.09169	-3.4749
			-9.45946			-8.08005	27.3387
			-2.14683			-8.0563	-36.942
			1.46208			-8.05085	-1.08488
			21.0526			-8.03601	35.83
			-3.88889			-8.03344	31.25
			0.732601			-8.03175	24.5098
			0.588239			-8.02435	25.1025
			5.13834			-8.01136	-6.72954
			31.0292			-8	-7.58827
			-4.34783			-8	-12.6656
			9.59384			-7.93651	-15.1628
			0			-7.93374	15.3163
			-35.7143			-7.92125	-1.68269
			-1.44928			-7.91855	-21.8638
			30			-7.91476	1.47059
			3.09524			-7.90791	41.6413
			37.8558			-7.89474	-11.3636
			15.1724			-7.86536	7.04607
			21.7209			-7.84314	38.0952
			7.31132			-7.84314	49.4737
			0.0674764			-7.84158	-2.61905
			0			-7.83716	20.8644
			-2.49795			-7.83008	73.8095
			0			-7.8125	4.83092
			-16.3188			-7.80399	15.2774
			32.5			-7.79221	23.1855
			8.33333			-7.77778	20.8928
			4.90909			-7.77274	-8.67898
			11.1607			-7.7717	21.7949
			4.85294			-7.74232	23.6207
			6.49718			-7.72727	15.1194
			4.28571			-7.72727	-26.3158
			1.25			-7.72464	44.4444
			-12.1795			-7.72358	26.8817
			12.5			-7.72296	-13.4301
			10.8466			-7.7112	34.6154
			-4.6131			-7.70691	5.88235
			0			-7.69987	4.7619
			32.8136			-7.69231	-22.7273
			-19.6481			-7.69231	10.9859
			-5.22876			-7.69231	10.7327
			0.109775			-7.69231	8.91841
			9.98498			-7.69231	-4.92674
			-5.89388			-7.6764	0
			3.95604			-7.67328	4.54545
			-8.58243			-7.66731	-31.6667
			-0.91954			-7.6513	40
			29.8701			-7.63889	9.9384
			11.4152			-7.62712	-29.6296
			6.25			-7.61905	4.79303
			-12.6316			-7.61099	-20.5714
			20.7692			-7.58514	7.91585
			-19.8864			-7.57576	40
			-27.3756			-7.56579	11.6935
			0			-7.56173	-11.4943
			-4.15745			-7.55765	-22.0096
			0			-7.54386	-29.0939
			4.45344			-7.54352	1.90476
			-1.7089			-7.5431	-0.516796
			0			-7.53968	-0.0805153
			15.2074			-7.5333	0
			-6.19658			-7.52951	17.8886
			-28.1723			-7.51784	1.88508
			0.18044			-7.51642	20.5314
			0			-7.51174	-14.7005
			-3.57143			-7.46922	40
			-15.9091			-7.45889	37.037
			0			-7.45856	7.40132
			-3.02846			-7.45614	8.14815
			3.9973			-7.45416	8.42454
			-3.23436			-7.44888	4.50794
			7.69231			-7.43802	-18.8312
			0.416667			-7.4359	10.7143
			-5.08744			-7.43224	-7.60971
			-1.46048			-7.42857	2.24132
			-0.653179			-7.41249	2.0624
			0.294958			-7.41078	0.630572
			-14.5511			-7.4045	8.34754
			20			-7.38636	-14.2857
			0			-7.37705	-22.2222
			37.7778			-7.36842	-0.926989
			3.77254			-7.36677	22.7273
			0.357143			-7.35931	-19.2105
			7.17703			-7.34878	53.6036
			3.4413			-7.33652	0.909091
			-7.14286			-7.32568	16.186
			-8.93571			-7.32265	28.3333
			-10.675			-7.32035	46.6165
			6.56315			-7.31707	24.1892
			1.66649			-7.31059	11.0324
			-12.4155			-7.29428	20.1601
			3.76984			-7.29416	43.75
			0			-7.27459	59.0476
			-8.86094			-7.25614	8.33333
			-2.31092			-7.25462	1.12782
			-1.08641			-7.25448	25.8283
			3.31551			-7.25275	-0.228632
			6.59907			-7.2407	-4.5977
			24.2424			-7.23026	9.23929
			-3.52593			-7.22222	11.7512
			-4.1382			-7.2093	-14.5833
			8.72575			-7.20339	19.6621
			-4.08654			-7.19807	-7.14286
			1.31868			-7.19697	-3.0303
			-9.52381			-7.18658	9.92433
			-0.985915			-7.18577	9.25427
			-10.618			-7.17939	14.1026
			44.7619			-7.17308	-2.5
			10.1231			-7.17213	-11.2466
			9.84615			-7.16865	-4.7619
			20			-7.1618	-11.0342
			-3.84043			-7.14286	9.52381
			-7.8125			-7.14286	8.04196
			-14.109			-7.14286	23.1092
			-17.7797			-7.14286	35.1675
			-8.32464			-7.14286	9.98682
			-1.00241			-7.14286	22.7273
			-1.94149			-7.14286	-20.0405
			-12.3034			-7.14286	5.62771
			3.89306			-7.14286	17.9487
			-3.33333			-7.14211	-6.7623
			1.10347			-7.13587	7.14286
			0			-7.1277	-8.64865
			-1.27389			-7.12366	-9.26724
			13.5104			-7.11646	-22.117
			10.6032			-7.11087	-17.0528
			3.98151			-7.10506	9.10646
			-1.62037			-7.09273	43.1373
			-11.1111			-7.08261	7.66626
			3.20531			-7.07308	-6.08974
			-13.0952			-7.06261	13.8889
			-5.7971			-7.05882	-12.7778
			-13.4168			-7.05882	27.5926
			-4.38874			-7.05325	13.8889
			17.6471			-7.05128	38.733
			0.33147			-7.04856	3.86623
			-7.77512			-7.01754	-15.1515
			23.2348			-7.01754	-16.6667
			-6.66667			-7.01714	17.2525
			11.1722			-7.01598	-10.2599
			6.55914			-7.01448	4.74325
			-1.92308			-7.01149	21.4286
			18.2992			-7.01149	1.85529
			-2.06625			-7.0028	21.9457
			-31.5789			-7.00258	2.03063
			7.43671			-6.99845	-0.895921
			3.22581			-6.98998	4.11067
			55			-6.98381	-7.77778
			17.6768			-6.97924	7.69231
			-3.25843			-6.96095	-11.8881
			-0.0517598			-6.95971	7.14286
			1.01488			-6.95907	27.2727
			8.65385			-6.94981	8.47729
			8.51852			-6.91964	-2.07152
			0.540541			-6.91095	43.5897
			-20.1952			-6.91057	3.55079
			2.05069			-6.90476	-8.68961
			11.3201			-6.89655	-9.71429
			-9.16667			-6.85805	-52.7273
			4.91296			-6.85781	28.5714
			2.06186			-6.8394	-3.82353
			11.6541			-6.82358	0
			7.02327			-6.82245	10.084
			2.0585			-6.81818	2.46212
			10.1576			-6.81818	-0.00461233
			13.017			-6.81818	-8.47953
			-2.73752			-6.81818	1.02857
			-7.05865			-6.80684	-10.8456
			0			-6.80096	8.82353
			-6.69821			-6.79825	-8.52713
			11.9711			-6.79429	4.72332
			0			-6.76471	3.33333
			4.46143			-6.75893	2.46305
			-32.9966			-6.75169	8.09822
			0.551724			-6.74603	42.8571
			1.84022			-6.73837	-7.89474
			-5			-6.72631	21.5701
			21.25			-6.71703	16.6667
			6.92308			-6.71463	-12.1212
			32.1429			-6.71296	5.55556
			8.57143			-6.71228	7.35867
			-9.09091			-6.69153	25
			-7.40741			-6.68203	6.1135
			0			-6.678	-7.40741
			-18.9394			-6.67702	-5.82456
			19.2228			-6.66761	19.5122
			-15.0376			-6.66667	22.2222
			3.25799			-6.66667	-2.27273
			-24.0196			-6.66667	-2.86325
			-9.09091			-6.66667	3.0374
			17.6778			-6.66667	-2.11533
			-7.83699			-6.66667	-6.97378
			7.79221			-6.66667	-2.5974
			-9.84916			-6.66255	0.59638
			5.88235			-6.6313	4.91305
			-4.92593			-6.62934	8.31799
			-2.02671			-6.61765	-11.1111
			1.06869			-6.60714	10.1852
			-1.39383			-6.60099	-9.02228
			-1.47783			-6.6008	-10.2638
			4.54545			-6.59987	20.8333
			0			-6.59537	0.288481
			18.552			-6.58307	-1.96078
			2.75735			-6.55271	28.2297
			-19.7115			-6.5466	-29.4872
			2.27273			-6.53659	14.2558
			-12.0879			-6.52632	7.65288
			14.1026			-6.5133	26.6667
			3.95271			-6.50972	-2.70701
			7.89556			-6.50749	5.83028
			5.55556			-6.49351	6.815
			-13.5281			-6.48685	-57.8571
			42.8571			-6.47727	56.5139
			2.21228			-6.47711	1.44269
			0			-6.46789	4.07614
			-10.5051			-6.46221	-6.09126
			-14.9221			-6.45862	2.5974
			3.06779			-6.45161	-16.4216
			-26.1905			-6.45152	-15.5166
			41.6667			-6.42857	12.5
			-34.3249			-6.42633	-13.5246
			1.3418			-6.42257	1.16646
			-1.49068			-6.40934	2.74074
			2.77778			-6.39535	0.181724
			-19.1176			-6.38587	3.88298
			18.4615			-6.37996	9.31174
			1.92598			-6.37077	-2.27642
			-19.4079			-6.36832	3.6989
			5.53595			-6.36364	15.416
			-1.94958			-6.36364	-9.65034
			-10.2941			-6.35251	-0.793651
			0			-6.34921	0.613497
			0.840336			-6.34921	1.07527
			8.11594			-6.33122	6.05565
			3.40426			-6.31868	8.42105
			0.486203			-6.31731	-6.63561
			0.0213129			-6.31579	5.56095
			-7.27273			-6.3135	7.14286
			20			-6.31185	-7.99534
			-5.17394			-6.30778	8.03571
			5.252			-6.30684	4.56164
			24.951			-6.29991	-36.6667
			20.4545			-6.29685	3.24675
			5.14706			-6.29325	-3.25203
			9.04762			-6.28931	-23.3967
			-37.1429			-6.28688	20
			9.09091			-6.28571	4.29293
			12.9187			-6.26551	21.3333
			7.40741			-6.26536	1.79015
			-20			-6.25	-18.4829
			27.8261			-6.25	-18.3333
			0			-6.25	-1.81818
			-22.4138			-6.25	10.3815
			-14.2857			-6.25	7.44544
			-5.59441			-6.25	-13.9112
			0			-6.25	-14.1555
			10.7426			-6.25	-12.1295
			-17.1454			-6.25	1.22549
			4.54545			-6.25	-18.958
			-33.3333			-6.24196	7.66459
			-0.0891266			-6.23265	-26.3736
			-17.2727			-6.22871	16.5323
			-0.793651			-6.19919	-2.50984
			-1.81818			-6.19711	-5.69386
			-18.4149			-6.19541	-6.35026
			48.583			-6.19048	-2.48491
			-15.6349			-6.18735	-0.134263
			-0.106838			-6.18729	-0.66525
			-19.0476			-6.1615	-4.5654
			-3.10345			-6.15873	10.462
			0			-6.15468	-2.94489
			0			-6.15385	-5.96849
			0			-6.15154	-5.68566
			10			-6.14729	-6.21783
			0			-6.139	15.0905
			-22.2222			-6.13027	17.2795
			4.0293			-6.12981	3.02662
			-2.36364			-6.12814	-4.41176
			-0.547382			-6.12785	15.528
			5.83804			-6.12245	9.375
			4.93579			-6.11111	-17.7992
			-11.0256			-6.09319	17.1514
			13.6842			-6.08974	14.3669
			51.8182			-6.07955	7.33333
			16.4536			-6.07903	8.37321
			5.19481			-6.07393	-9.87515
			-17.5325			-6.06061	2.66945
			20			-6.06061	2.75995
			0			-6.06061	40
			4.54545			-6.05507	-7.14286
						-6.03175	-11.204
						-6.00751	-10.6918
						-6.0016	6.25259
						-6	5.65135
						-6	-0.769231
						-5.99918	5.19713
						-5.99427	-20.8947
						-5.99239	11.9174
						-5.97811	-5.31148
						-5.97701	1.30932
						-5.97222	22.0588
						-5.93262	16.1853
						-5.92038	-1.96078
						-5.91267	0
						-5.91047	0
						-5.90641	-1.06101
						-5.90164	8.01513
						-5.8939	22.7444
						-5.88235	12.8062
						-5.88235	-6.66667
						-5.86695	20
						-5.85859	-0.365497
						-5.84028	7.14286
						-5.83333	-1.36902
						-5.82095	-4.37406
						-5.82011	4.09429
						-5.81642	1.14555
						-5.81114	2.76451
						-5.80645	-14.2857
						-5.80005	13.1579
						-5.7971	3.14135
						-5.7971	12.4138
						-5.78414	0.484179
						-5.78358	1.74812
						-5.78073	0.290225
						-5.77819	-5.3622
						-5.77616	-5.41658
						-5.76881	-12.2689
						-5.76735	4.68422
						-5.74973	-2.27273
						-5.72973	2.30931
						-5.72337	45.4545
						-5.71429	4.5526
						-5.71429	5.88235
						-5.70825	-8.9211
						-5.70618	0.0362481
						-5.69352	-10.2871
						-5.68962	-3.06707
						-5.68838	8.03571
						-5.67064	-6.66667
						-5.66802	4.00746
						-5.65409	1.2093
						-5.64753	4.95386
						-5.6391	-23.8889
						-5.63547	1.59336
						-5.6266	-5.3211
						-5.61903	4.95407
						-5.59357	6.42227
						-5.59211	-0.446841
						-5.57432	13.0943
						-5.57148	42.1429
						-5.5645	-1.18718
						-5.55556	6.66557
						-5.55556	-2.38429
						-5.55556	-0.744263
						-5.55556	-2.5
						-5.53111	0.659805
						-5.52503	29.3103
						-5.51948	45.5882
						-5.51832	22.2222
						-5.50314	-0.083612
						-5.5	-11.8519
						-5.49569	-4.84848
						-5.49377	-6.25
						-5.4902	-15.2174
						-5.4902	-3.45764
						-5.48056	-8.59262
						-5.47562	-23.8095
						-5.46296	-7.6087
						-5.45121	-4.35353
						-5.44169	-9.77011
						-5.44073	1.11111
						-5.43478	-4.20168
						-5.4232	14.8571
						-5.41353	12.1212
						-5.40541	10
						-5.40541	-5.72414
						-5.40427	4.71445
						-5.39216	-6.58915
						-5.38625	4.30769
						-5.38462	3.6557
						-5.3833	-0.639269
						-5.36469	-3.48584
						-5.34884	-7.1525
						-5.34562	2.38095
						-5.34204	-10.6484
						-5.3355	10.4965
						-5.33238	1.04526
						-5.31412	58.3333
						-5.31136	-2.10147
						-5.30303	-0.187617
						-5.29893	20.8333
						-5.29742	-28.7879
						-5.29701	-18.4524
						-5.29412	1.00381
						-5.28962	17.1286
						-5.28869	9.87395
						-5.2886	7.80312
						-5.28541	24.1228
						-5.27187	33.2386
						-5.26874	0
						-5.26316	3.64306
						-5.26316	11.0221
						-5.26316	10.9445
						-5.23504	-2.21941
						-5.22957	1.33273
						-5.22776	2.72727
						-5.22082	-12.0455
						-5.20833	-13.0021
						-5.20362	2.79973
						-5.19276	7.27273
						-5.1507	36.3636
						-5.1495	-16.4141
						-5.12422	-25.7143
						-5.10856	-1.78571
						-5.07518	2.72235
						-5.07364	-0.239234
						-5.07308	-6.2585
						-5.06237	16.8421
						-5.05602	-17.9487
						-5.05051	-12.9808
						-5.04344	19.9414
						-5.03876	0.593542
						-5.02415	3.89064
						-5.01961	-7.48792
						-5.01318	15.7364
						-5.01253	17.8571
						-5	16.3725
						-5	-8.96552
						-5	3.88597
						-5	-6.25
						-5	26.9231
						-5	14.4144
						-5	1.66667
						-4.99487	9.09091
						-4.99473	-7.58929
						-4.96633	-1.43577
						-4.96278	7.05803
						-4.96179	21.4286
						-4.9576	-0.0113907
						-4.95127	-6.03656
						-4.92754	55
						-4.92157	33.7827
						-4.9184	11.7751
						-4.91803	-5.45033
						-4.91056	-9.69142
						-4.90296	-3.33333
						-4.90196	1.52047
						-4.90028	-0.602168
						-4.89927	-53.6842
						-4.88722	-3.96962
						-4.88722	5.9572
						-4.86717	-6.8323
						-4.86625	-5.18834
						-4.86111	-21.6327
						-4.85294	2.0336
						-4.83278	-3.18935
						-4.83092	12.2605
						-4.82456	9.09091
						-4.81454	-5.00176
						-4.81149	-4.95169
						-4.80364	-1.31844
						-4.80342	-12.4378
						-4.79167	15.0794
						-4.78892	-14.1026
						-4.7767	1.24348
						-4.77163	-26.2626
						-4.76616	-5.50887
						-4.7619	-5.89651
						-4.7619	23.1373
						-4.7619	11.3187
						-4.75295	13.3333
						-4.74537	7.94872
						-4.72727	-1.0199
						-4.69697	10.8169
						-4.68966	-0.675676
						-4.68367	-13.6196
						-4.67901	4.45958
						-4.67626	0.966786
						-4.66507	-9.02778
						-4.66346	2.56892
						-4.66264	-4.00607
						-4.65839	-7.02243
						-4.65686	-3.84546
						-4.65614	9.84234
						-4.63089	30.7692
						-4.62791	-5.26316
						-4.62687	-0.999765
						-4.62306	-0.804226
						-4.61757	13.3693
						-4.61538	-3.98594
						-4.61538	-2.29717
						-4.61389	3.3165
						-4.60705	-9.31264
						-4.60526	-11.3095
						-4.6041	18.1818
						-4.5977	8.44679
						-4.58996	-4.60317
						-4.58333	1.0989
						-4.58333	7.51823
						-4.58065	19.9714
						-4.57875	0.154219
						-4.57516	1.51359
						-4.5621	-1.43529
						-4.5614	-13.3296
						-4.55526	4.64375
						-4.55088	-16.3177
						-4.55037	-3.77817
						-4.54545	-11.6747
						-4.54545	1.17451
						-4.54545	1.48817
						-4.54545	-2.04852
						-4.54545	9.78261
						-4.54182	-10.2769
						-4.54008	2.35043
						-4.52613	-2.17528
						-4.52547	9.29487
						-4.51064	-17.9118
						-4.49724	-0.858396
						-4.49296	-4.46571
						-4.47094	-7.17614
						-4.46429	1.86226
						-4.45813	6.7849
						-4.45047	5.05646
						-4.44544	-12.2442
						-4.44444	-3.63312
						-4.4335	3.35968
						-4.4289	5.35714
						-4.42611	-12.2189
						-4.42072	6.15942
						-4.41944	-4.54545
						-4.41865	10.4167
						-4.41176	10.4895
						-4.40705	-6.84787
						-4.40115	-3.27986
						-4.39639	-8.0014
						-4.38596	1.65485
						-4.37826	-7.05084
						-4.37559	-14.502
						-4.37342	0.754717
						-4.37284	6.2836
						-4.36422	9.68992
						-4.36364	-3.93939
						-4.3533	9.1986
						-4.34783	20
						-4.34783	-3.62999
						-4.34783	-21.2121
						-4.34783	1.92356
						-4.34615	45.4545
						-4.33715	0
						-4.32851	45.4545
						-4.3271	-1.81818
						-4.32607	-1.11111
						-4.3038	-2.49256
						-4.29839	0.5997
						-4.2912	6.21834
						-4.28671	-11.4286
						-4.28571	6.83705
						-4.28322	13.0952
						-4.2735	0.121593
						-4.27286	14.4444
						-4.26855	4.13793
						-4.26212	1.21428
						-4.25457	-8.61244
						-4.2527	35
						-4.2522	13.0952
						-4.23718	4.2168
						-4.23617	-1.25257
						-4.23412	-5.57415
						-4.22535	5.55556
						-4.22078	23.341
						-4.20958	-14.6739
						-4.1945	-22.8571
						-4.19192	-3.78378
						-4.18144	-15.7609
						-4.16667	9.31142
						-4.16667	-14
						-4.16667	-1.28205
						-4.14781	26.778
						-4.14119	-3.13167
						-4.14087	-37.8947
						-4.1372	-53.75
						-4.13565	-4.49123
						-4.13314	43.5897
						-4.11765	-2.80658
						-4.11076	-19.2369
						-4.098	-5.2381
						-4.09434	-6.12523
						-4.08805	0.0513611
						-4.07609	7.85895
						-4.07524	4.35294
						-4.07478	7.24026
						-4.07407	0.72599
						-4.0678	0.72599
						-4.04181	-0.305259
						-4.03509	6.27637
						-4.03226	2.71318
						-4.02477	-3.86304
						-4.01786	-3.12109
						-4.0127	-1.26605
						-4.00916	28.279
						-4.00246	-11.8301
						-4.00239	-8.54032
						-4	7.5
						-4	-6.8128
						-4	-10
						-3.9946	1.05263
						-3.99408	1.92308
						-3.98941	-4.61087
						-3.98922	-7.01754
						-3.98405	-8.91304
						-3.96825	-40.7792
						-3.96825	-6.46853
						-3.9627	6.33616
						-3.95413	7.95455
						-3.95272	-3.14176
						-3.94913	1.20989
						-3.94737	25
						-3.9441	3.8403
						-3.93228	0.534108
						-3.92765	8.34343
						-3.92157	-0.63857
						-3.92157	4.1958
						-3.91892	-18.315
						-3.89365	6.37899
						-3.89189	-5.55556
						-3.85233	10.9755
						-3.84615	-6.2919
						-3.84615	5.71985
						-3.84615	19.6429
						-3.84206	-5.12685
						-3.84071	8.94498
						-3.83598	-19.0083
						-3.82653	3.73122
						-3.82624	17.5439
						-3.82015	2.44506
						-3.81818	12.6089
						-3.81232	2.84948
						-3.80952	1.91441
						-3.79324	6.39394
						-3.78788	38.4615
						-3.78788	-11.437
						-3.78788	2.38095
						-3.78788	-16.133
						-3.76658	20
						-3.7629	-40.1478
						-3.7594	14.1345
						-3.75	-45.5712
						-3.75	-3.8382
						-3.74953	-2.2308
						-3.74768	-3.92157
						-3.72144	12.1212
						-3.71943	-8.74137
						-3.7037	4.9417
						-3.7037	-5.29359
						-3.7037	15.5891
						-3.67965	15.4882
						-3.67647	8.44382
						-3.67347	1.72414
						-3.66667	-9.09091
						-3.66527	-2.74823
						-3.66001	-41.8391
						-3.65697	5.10155
						-3.65441	-2.77417
						-3.65267	0
						-3.65047	31.8681
						-3.64201	-0.669873
						-3.63963	-16.4187
						-3.63636	-22.8235
						-3.63578	-20.0782
						-3.62954	-11.8781
						-3.62005	3.74332
						-3.61991	-5.15357
						-3.61652	-6.34921
						-3.60046	-27.341
						-3.60018	14.0867
						-3.59963	-2.25628
						-3.59477	-22.9196
						-3.59373	0
						-3.58974	-4.50721
						-3.58583	3.88456
						-3.57218	-5.05631
						-3.57143	-10.6717
						-3.57143	-19.1799
						-3.56197	-5.01938
						-3.53652	-14.7185
						-3.53482	8.46561
						-3.52941	5.70486
						-3.52301	3.87597
						-3.5205	-9.89691
						-3.51351	10.5882
						-3.50877	4.75382
						-3.48548	5.68076
						-3.48008	-6.51562
						-3.47866	22.8571
						-3.47357	13.6047
						-3.47327	26.1538
						-3.47222	-3.57143
						-3.46405	8.15789
						-3.4632	17.2121
[truncated: 4,390 more rows]

## Sheet: Fig 2B
Fig 2B: Loci with reduced sRNAs in mat nrpd1+/- or pat nrpd1+/- exhibit maternally- or paternally-biased sRNAs in WT. Genes and TE showing differential abundance of 24 nt sRNAs in nrpd1 heterozygotes were grouped into bins by the % of sRNAs produced from the maternal alleles of that locus in WT. Fold-change was calculated by DESeq2.Tukey plot represents fold-change in each group. Circles show fol…
	Log2 (mat nrpd1+/- / WT)				Log2 (mat nrpd1+/- / WT)
% maternal	≥ 80	≥20 and < 80	<20		≥ 80	≥20 and < 80	<20
	-5.0029	1.30671	1.79959		1.76734	-2.34433	-3.5223
	-1.62584	-5.29942	1.65281		1.34291	-1.92771	-2.97942
	1.04538	-6.70573	1.52684		1.26214	-1.85901	-1.57964
	-2.3461	1.1085	1.32684		1.16196	-1.79423	-2.62348
	-5.43891	1.10528	1.32414		1.09439	-1.74106	-2.4762
	-4.26477	-2.16568	1.29304		1.05768	-1.69463	-1.15597
	-5.83193	1.19123	1.27501		1.0454	-1.61386	-2.37229
	-3.60956	1.09683	1.23368		1.03781	-1.59151	-2.17558
	-3.83417	-1.26513	1.16646		-1.00485	-1.43911	-2.12561
	-4.89775	1.01046	1.0847		-1.1692	-1.42602	-1.98416
	-3.40414	-1.15795	1.08359		-2.61477	-1.35722	-1.94025
	-6.65679	1.12966	1.07946			-1.33243	-1.71584
	-2.97924	1.13478	1.07635			-1.29769	-1.69149
	-4.71376	1.01518	1.07277			-1.25632	-1.64824
	-7.96558	1.1276	1.06481			-1.23997	-1.58468
	2.47018	-1.31535	1.05634			-1.22601	-1.43081
	-2.80681	1.08395	1.04214			-1.15497	-1.43028
	-5.54084	-4.27689	1.03774			-1.15239	-1.38919
	-4.1045	1.07142	1.02573			-1.13982	-1.38908
	-7.10488	-1.23478	1.01335			-1.12069	-1.3659
	-3.06003	1.10006	1.00284			-1.11032	-1.26001
	-6.64101	1.09474	-1.07701			-1.10261	-1.22427
	-5.92629	1.11068	-1.08412			-1.10074	-1.19467
	-2.73445	-4.16268	-1.13742			-1.09805	-1.18936
	-2.24257	1.01518	-1.15634			-1.08813	-1.1669
	-5.24592	2.03982	-1.21548			-1.0861	-1.13308
	-6.68956	1.40333	-1.25806			-1.08346	-1.11289
	-4.73622	1.19627	-1.30106			-1.07882	-1.09107
	-4.88366	1.55828	-1.78276			-1.076	-1.0903
	-2.66792	1.10718				-1.07365	-1.08263
	-2.29837	-1.09807				-1.07198	-1.05324
	-4.62498	1.15116				-1.06476	-1.00182
	-3.9194	1.08865				-1.06032	1.71346
	-3.58075	-1.66096				-1.05204
	-5.6899	1.21948				-1.04392
	1.15041	1.03742				-1.04276
	-2.15367	-1.06712				-1.04267
	-3.048	1.06286				-1.03633
	-7.41492	-1.0884				-1.02932
	-2.2421	1.01301				-1.02387
	-5.15241	-1.01477				-1.02045
	-6.50879	1.48428				-1.00559
	-8.62462	1.10337				1.00616
	-5.91526	1.00533				1.02075
	-1.6415	1.04454				1.02164
	-4.98515	1.42504				1.02956
	-1.26634	-1.05257				1.10021
	-5.70901	1.05243				1.12455
	-6.47853	-1.7285				1.17125
	-3.39459	1.3504				1.36498
	-1.33042	1.01123				1.69962
	-1.73133	1.0636				2.11469
	-5.53048	1.00702
	-1.14712	-1.56226
	-1.59618	-1.22699
	-1.63921	1.17728
	-6.31486	1.142
	-1.00459	-1.19237
	-4.03042	-3.64422
	-6.76036	-1.10332
	-6.22676	-1.57029
	-1.26752	1.27286
	-3.20274	1.33685
	-6.63116	1.26414
	-1.17226	-1.6904
	1.10614	1.54727
	-6.64031	-1.04352
	-7.31117	-1.08604
	-4.69465	-1.74937
	-1.1315	-1.31386
	-3.81311	-1.51193
	-1.96472	-1.14425
	-3.05935	1.32756
	-2.48389	1.12477
	1.0574	1.10374
	-5.46826	1.00183
	-5.31687	1.02039
	1.11867	-1.82463
	-4.97613	-1.02145
	-7.45109	-1.11609
	-3.54689	1.16253
	-1.39901	-1.10942
	-3.01635	-1.49693
	-4.36184	1.07026
	-1.08233	-1.12433
	-2.23076	1.06944
	-3.0821	-4.30567
	-3.67798	1.22952
	-1.62157	1.18485
	-2.46182	-1.59011
	-2.79608	1.22126
	-3.40605	1.50617
	-3.62448	1.217
	-2.69305	-1.31515
	-3.58059	-2.37015
	-1.07506	-1.01714
	-4.61173	-1.47386
	-2.81555	-1.19597
	-3.7486	-1.64861
	-5.58858	-1.31658
	-2.27432	1.0096
	-3.15127	1.492
	-4.799	-2.17968
	-6.81467	-1.01749
	1.2023	-1.3165
	-1.36218	-1.19361
	-3.8686	-1.50485
	-2.9832	-2.32805
	-2.33874	-2.39301
	-5.71143
	-1.32236
	-1.19582
	-2.183
	-4.23644
	-1.96185
	-1.25693
	-4.64791
	-1.46455
	-4.45814
	-1.68947
	-1.24926
	-3.05151
	-2.82873
	-3.04792
	-3.91105
	-1.42323
	-1.86576
	1.31323
	-1.00193
	-2.62081
	-1.2493
	1.00596
	1.02877
	-1.09945
	-3.34898
	-3.74853
	-1.05926
	-2.83535
	-1.40538
	-5.07321
	-1.01112
	-3.04739
	-4.38985
	1.03154
	-4.61402
	-2.66368
	-3.32197
	-1.43738
	-1.04385
	-4.55078
	-2.93261
	-1.69055
	-1.9175
	-1.87262
	-2.48694
	-2.06524
	-1.16315
	-4.82031
	-1.18424
	-1.11999
	-1.77054
	-1.9641
	-2.51943
	-3.91611
	-1.75612
	-2.28687
	-2.11564
	-2.52827
	-2.71669
	-2.71063
	-3.33416
	-4.64748
	-2.70609
	-2.00461
	1.12135
	-3.44455
	-3.11727
	-2.24027
	-1.70704
	-2.72016
	-3.66373
	-2.27056
	-3.51076
	1.13972
	-1.27716
	-1.1717
	1.06193
	-3.47337
	-3.37298
	-1.96785

## Sheet: Fig 2C
Fig 2C: Loss of maternal NRPD1 leads to a reduction in the abundance of sRNAs from maternally-biased ISRs (imprinted small RNA region
Significant								Not Significant
Chr	start	stop	Log 2(mat nrpd1+/- /wt)	padj	Average WT	Average mat nrpd1+/-		Chr	start	stop	Log 2(mat nrpd1+/-/wt)	padj	Average WT	Average mat nrpd1+/-
Chr3	1210500	1210800	-7.10524	1.09428e-291	15829.3	84.4267		Chr4	6395400	6396300	-1.07272	0.0847337	12.03	0.42
Chr3	9708300	9708900	-6.27072	1.21629e-283	7395.46	75.7267		Chr1	11139600	11139900	-1.26446	0.0862782	14.9783	2.1
Chr3	20030700	20031300	-6.86622	1.84504e-260	10513.8	64.05		Chr3	9736800	9737100	-0.975873	0.102105	24.7333	8.86333
Chr3	15682200	15682800	-6.52954	2.34438e-251	7622.07	44.2167		Chr1	17071800	17072100	0.616588	0.108903	148.597	241
Chr4	18256200	18256500	-6.23524	1.50654e-225	6116.99	58.0433		Chr1	4312200	4312500	-1.21464	0.112042	12.7983	1.18667
Chr3	14315400	14315700	-6.86701	3.4233e-225	6904.27	47.6367		Chr5	21839400	21839700	-1.08939	0.114592	9.19333	0.895
Chr2	7205400	7206300	-6.17642	2.47678e-217	6856.1	67.6617		Chr2	10357800	10358100	0.0912273	0.146718	5252.27	4499.04
Chr3	8510700	8511000	-5.9992	2.08019e-210	5709.62	67.1883		Chr1	4993200	4993500	-0.538491	0.293938	79.5367	47.67
Chr1	13568400	13569600	-4.99973	1.98618e-201	10383.3	283.832		Chr2	11386800	11387100	0.322636	0.318623	95.9967	130.857
Chr4	7592400	7593300	-5.46955	1.71608e-171	2098.33	42.2033		Chr3	3542400	3542700	-0.31013	0.640261	108.57	85.21
Chr4	12841800	12842400	-6.18309	6.42968e-160	3607.13	27.2667		Chr5	7655100	7655400	-0.290187	0.742447	34.1567	25.945
Chr1	4506600	4506900	-6.99401	1.83319e-159	4383.24	13.4567		Chr2	10355700	10356600	0.0568146	0.756874	3940.35	3059.48
Chr5	1811700	1812300	-6.62615	2.41939e-145	3190.49	17.3		Chr2	5057700	5058000	0.13461	0.851187	232.42	258.008
Chr2	1926900	1927800	-4.18739	4.79854e-128	1977.51	171.42		Chr5	13162200	13162500	0.0413971	0.85733	42.2767	38.14
Chr4	13902900	13903200	-6.02358	6.58605e-126	4927.27	56.2933		Chr1	13896000	13896300	-0.185379	0.863508	48.16	13.9233
Chr1	13926000	13926300	-5.03977	2.22088e-124	3322.5	75.07		Chr5	23323200	23323500	-0.140087	0.906173	70.8267	50.1933
Chr5	21456000	21456300	-5.21479	1.97846e-123	1955.94	38.08		Chr5	13154700	13155000	0.0763917	0.911405	320.122	324.06
Chr2	639000	639600	-4.53293	2.79214e-122	2833.71	83.0467		Chr2	10409700	10410000	0.117541	0.920652	1116.17	1216.77
Chr5	20313600	20314200	-4.79927	7.48661e-121	2037.04	49.39		Chr5	15463800	15464100	0.158251	0.945843	12.225	14.6667
Chr5	21456600	21456900	-5.87328	4.25096e-118	2154.32	15.78		Chr3	16595700	16596000	-0.112665	0.94653	57.13	52.535
Chr4	12433800	12434400	-5.35423	3.94744e-117	1854.88	31.1233		Chr1	10372500	10372800	-0.129484	0.959334	10.6933	9.06833
Chr4	12484800	12485400	-6.99971	9.51791e-112	2626.36	7.24333		Chr5	12522900	12523200	0.0837706	0.96401	48.0083	50.8833
Chr3	20031600	20032800	-8.7505	2.11935e-106	6182.37	3.32833		Chr2	10356900	10357500	-0.00718204	0.964847	1968.59	2090.45
Chr1	12728400	12728700	-3.44203	2.72837e-92	4787.09	391.43		Chr4	5466000	5466300	0.0448816	0.971993	6.37333	6.41
Chr2	8040300	8040900	-3.98646	1.50759e-90	875.333	45.2067		Chr4	7063800	7064100	-0.0730367	0.978734	12.1367	11.0333
Chr5	7639800	7640100	-6.04028	1.11354e-89	1258.83	9.58		Chr5	8337900	8338200	-0.037915	0.981193	6.3	5.98333
Chr5	17174700	17175000	-4.79446	2.07381e-87	1818.06	48.06		Chr4	10796100	10796400	0.0575587	0.982337	15.26	16.3367
Chr3	18543300	18543900	-4.19977	1.6752e-83	801.43	33.5633
Chr1	16818600	16818900	-7.15308	3.91098e-83	1713.12	4.40333
Chr4	17637300	17638200	-5.56225	1.8404e-82	1061.8	16.7267
Chr3	18812400	18812700	-4.28034	2.26117e-81	818.497	25.93
Chr1	7810200	7810500	-5.59697	9.77241e-81	1230.85	10.8867
Chr3	14314800	14315100	-3.32952	3.23469e-80	787.887	62.47
Chr1	12742500	12743100	-4.08986	6.36525e-79	1553.09	66.0267
Chr3	17842500	17842800	-4.41242	3.59482e-73	965.515	42.3083
Chr4	12863100	12863400	-5.11479	1.53006e-70	1287.15	22.23
Chr2	2866500	2866800	-5.30605	7.77345e-68	3239.64	39.6667
Chr1	17641800	17642100	-7.92262	1.27781e-67	3357.76	2.52
Chr3	18545100	18545700	-5.65678	3.90324e-64	674.8	6.15667
Chr1	7075800	7076400	-5.26637	1.69928e-61	613.273	7.41
Chr5	13773600	13774200	-3.28289	2.37302e-59	2003.82	76.1
Chr1	4618800	4621200	-5.24416	3.06749e-58	828.812	13.9283
Chr2	5661000	5661300	-5.72089	3.13476e-58	2532.79	12.1667
Chr2	4108800	4109400	-3.82155	3.56774e-58	639.507	44.9567
Chr1	16885200	16885500	-3.53635	9.0042e-57	792.8	54.8767
Chr5	15340200	15340500	-6.09665	6.5338e-56	2392.06	5.44667
Chr1	7808400	7809300	-6.18275	3.04406e-53	3027.64	3.88833
Chr2	4105800	4106100	-3.05698	6.24017e-53	1430.1	153.9
Chr1	16884300	16884600	-3.3047	3.32127e-52	1829.23	180.158
Chr5	13775100	13775400	-7.68208	5.13953e-52	2410.47	2.01833
Chr5	22704300	22704600	-7.0325	8.74625e-50	1449.76	2.92333
Chr3	9707400	9707700	-3.67689	3.22301e-47	3078.02	7.47333
Chr5	9801300	9801600	-5.34498	5.2935e-47	4197.72	37.1483
Chr4	12435000	12435300	-3.52407	4.7813e-46	652.28	96.7833
Chr4	9961800	9962100	-6.88392	5.9388e-44	1447.15	1.74667
Chr5	9113700	9114300	-7.06607	1.68819e-43	1368.43	3.68667
Chr5	7648800	7649100	-4.91147	6.72931e-43	928.023	19.7933
Chr2	6431400	6432000	-5.22313	9.96746e-43	820.443	4.27
Chr2	2864700	2865900	-4.28501	8.54236e-40	335.317	9.57333
Chr5	22702800	22703100	-5.74069	1.33631e-39	1819.16	29.5967
Chr2	11044800	11045400	-8.02073	7.30381e-38	2846.09	1.02333
Chr2	6632100	6632400	-6.80295	6.38515e-37	1208.47	1.875
Chr5	8825400	8825700	-4.09893	1.65093e-35	1816.81	36.4167
Chr3	14728500	14729100	-3.005	2.05341e-35	368.403	46.77
Chr1	446700	447300	-6.25061	6.57779e-35	675.66	2.54
Chr2	7204500	7204800	-3.79925	6.79305e-35	357.707	17.1317
Chr5	8826600	8826900	-4.90149	2.8602e-34	810.93	2.54
Chr3	7419900	7420200	-6.28057	1.13773e-33	824.355	1.98167
Chr2	6633600	6634200	-3.3419	2.63112e-33	330.563	22.83
Chr3	9717000	9717300	-4.78848	3.2863e-33	879.25	2.94
Chr2	5663100	5663400	-4.01947	3.99051e-33	358.765	12.7717
Chr2	8403600	8404200	-3.9682	5.91126e-33	309.18	5.39667
Chr3	10748700	10749000	-3.8003	8.1973e-32	1042.08	45.9033
Chr3	18357300	18358200	-3.3657	2.71093e-31	937.987	17.6333
Chr5	8826000	8826300	-3.67189	1.69795e-30	267.637	11.37
Chr2	8874900	8875200	-3.42963	2.7927e-30	322.527	20.7083
Chr2	8037900	8038500	-5.18895	2.20712e-29	397.537	3.26667
Chr3	5779200	5779500	-5.87106	8.864e-29	773.787	1.37
Chr2	637500	638400	-4.29534	6.81351e-28	588.81	9.79333
Chr1	4505100	4505700	-4.27546	7.31868e-27	392.067	2.07333
Chr5	20314500	20314800	-3.24323	9.70336e-27	263.723	18.7267
Chr3	6295800	6296100	-5.34235	1.55104e-26	388.613	4.82667
Chr2	12799200	12799500	-5.69561	4.90965e-26	530.7	1.49667
Chr5	16257600	16258500	-2.17426	3.64218e-24	1281.68	177.615
Chr3	8370900	8371200	-4.10708	4.11833e-24	724.257	13.9767
Chr2	9469200	9469500	-6.1116	3.34399e-23	1007.78	1.79
Chr5	7641000	7641600	-5.54054	4.102e-23	391.337	1.42
Chr2	4105200	4105500	-2.00391	4.18062e-23	550.257	145.12
Chr3	10947300	10947600	-4.13842	6.17815e-23	425.027	6.71667
Chr2	7182600	7183200	-4.14499	8.74716e-23	495.07	3.44667
Chr5	10860600	10860900	-4.41231	2.63942e-22	318.103	2.88667
Chr2	6646800	6647100	-3.7982	3.52317e-22	721.193	4.39667
Chr3	10749300	10749600	-3.97855	1.19211e-21	427.422	15.2167
Chr3	9715500	9715800	-4.48512	5.35045e-21	205.547	2.39833
Chr3	10748100	10748400	-2.71638	2.39392e-20	754.44	82.71
Chr4	9048900	9049200	-4.16231	2.78511e-20	642.692	5.68667
Chr1	12740700	12742200	-2.65101	3.55517e-20	475.907	74.185
Chr1	6235800	6236100	-2.4536	6.26553e-20	242.887	39.5033
Chr4	12842700	12843000	-5.24798	7.1746e-20	989.503	6.08167
Chr1	1593000	1593300	-3.56596	1.20934e-19	420.08	8.59667
Chr4	15695700	15697200	-3.78314	1.73871e-19	1154.82	4.89333
Chr3	18546000	18546300	-6.49222	1.74978e-19	691.167	0.746667
Chr1	9958500	9959100	-3.56956	3.96954e-19	564.947	7.08
Chr2	11991900	11992800	-6.06645	8.57426e-19	991.913	0.326667
Chr2	11043600	11044200	-3.63059	1.22759e-18	159.353	2.19333
Chr4	6031800	6032100	-4.9718	4.05887e-17	261.49	1.44333
Chr5	20771700	20772000	-6.10192	1.15785e-16	566.368	0.863333
Chr5	21999000	21999300	-4.34143	2.19579e-16	571.037	0
Chr1	5812500	5813100	-6.03131	6.67136e-16	535.853	0.346667
Chr1	9956100	9956400	-4.79924	1.30523e-15	399.37	2.83667
Chr5	22020600	22020900	-4.72529	1.54503e-15	602.237	4.78667
Chr5	22704900	22705200	-4.08404	2.18494e-15	875.828	18.905
Chr4	5440200	5440800	-3.9576	2.33659e-15	137.657	17.5867
Chr1	16819200	16820100	-2.96424	2.99487e-15	192.615	21.2533
Chr1	4068900	4069200	-4.0134	4.82146e-15	228.503	4.53333
Chr2	11047500	11047800	-3.30599	8.44403e-15	920.587	1.69167
Chr2	11993400	11994300	-4.48271	3.46148e-14	174.77	1.09333
Chr2	345300	345900	-3.05308	4.42167e-14	107.943	1.69667
Chr5	17175300	17175900	-3.72668	1.1459e-13	156.86	5.87333
Chr2	6631500	6631800	-4.27709	1.21673e-13	308.265	4.01833
Chr4	8947800	8948400	-2.32352	1.26643e-13	145.493	21.4167
Chr1	11618100	11618700	-2.423	1.36143e-13	151.05	17.6733
Chr1	13925400	13925700	-1.43179	1.47904e-13	421.75	145.683
Chr4	9162900	9163800	-3.0548	4.71859e-13	209.993	2.09667
Chr5	22442100	22442400	-3.41957	7.18432e-13	91.83	2.26333
Chr2	12799800	12800400	-3.53951	1.06213e-12	259.957	0
Chr3	8265900	8266200	-4.542	1.09533e-12	268.51	1.83333
Chr2	2867100	2867700	-2.48005	1.45543e-12	131.123	5.73333
Chr4	9087900	9088200	-3.22561	1.64175e-12	177.45	4.93333
Chr5	10178700	10179300	-2.39833	1.64761e-12	96.9467	12.8433
Chr3	7421100	7422000	-4.45581	7.60028e-12	139.603	3.59667
Chr5	18636000	18637200	-4.58974	8.62269e-12	222.728	0.883333
Chr5	15340800	15341100	-2.95072	3.09286e-11	71.7267	3.54
Chr2	8876400	8876700	-3.23382	4.83347e-11	344.913	1
Chr5	13615800	13616100	-2.29805	2.20743e-10	128.023	5.24667
Chr5	6439500	6439800	-2.09478	2.22229e-10	191.723	38.23
Chr2	346500	346800	-4.82324	2.00891e-09	296.1	0.756667
Chr4	10299600	10299900	-2.65233	2.25195e-09	56.975	3.45167
Chr5	21906300	21907200	-3.42735	2.70389e-09	72.6667	0.766667
Chr2	8872800	8873100	-3.29065	3.68073e-09	81.1533	1
Chr3	22409400	22410000	-4.05689	4.50607e-09	102.467	0.746667
Chr5	5749200	5749500	-1.90516	4.9823e-09	123.637	26.4017
Chr5	8824800	8825100	-3.2982	7.04746e-09	71.24	1.02333
Chr2	9470700	9471000	-1.63427	7.23253e-09	161.065	45.6267
Chr3	8371800	8372100	-2.06036	1.3968e-08	326.307	30.2633
Chr5	8824200	8824500	-3.80371	1.55854e-08	92.9567	0.326667
Chr5	6440700	6441000	-3.17276	1.62417e-08	125.572	2.61167
Chr5	22322700	22323000	-1.56051	5.0671e-08	992.98	300.225
Chr1	6946800	6947100	-3.50978	1.35081e-07	72	0.346667
Chr1	7809600	7809900	-3.24923	1.76508e-07	61.0933	0.746667
Chr2	7185600	7186200	-3.51625	1.8509e-07	79.5283	0.383333
Chr1	5970600	5970900	-1.21914	3.17294e-07	614.437	235.497
Chr3	6294900	6295500	-1.18704	3.49791e-07	324.4	127.093
Chr5	21998100	21998400	-3.45345	5.17851e-07	93.9467	1.15333
Chr1	12743400	12743700	-1.91187	7.36841e-07	43.72	7.46
Chr4	12841200	12841500	-1.55223	8.33926e-07	84.8267	13.13
Chr2	11045700	11046000	-3.1604	1.05019e-06	46.8183	0.21
Chr1	14276700	14277300	-0.951367	1.40197e-06	186.333	124.753
Chr2	7184100	7184400	-4.37302	1.4027e-06	301.447	0.21
Chr5	3753900	3754200	-3.2098	1.81822e-06	67.8933	1.20667
Chr5	13804200	13804500	-2.68716	2.06256e-06	71.9167	1.51667
Chr5	9115200	9115500	-2.13802	3.84008e-06	40.8067	3.85
Chr1	5811900	5812200	-2.38868	4.06986e-06	37.935	1.68667
Chr1	17335500	17335800	-1.6564	5.49776e-06	84.075	21.3533
Chr1	8673600	8674500	-2.53066	1.03013e-05	66.21	3.18333
Chr5	20771100	20771400	-2.50085	1.142e-05	35.82	1.26833
Chr3	8361900	8362200	-3.01672	1.16362e-05	72.9133	1.715
Chr5	4842600	4842900	-2.53467	3.49346e-05	34.2367	0.346667
Chr2	6434100	6434400	-1.32472	4.48886e-05	127.27	47.5883
Chr2	9468300	9468600	-2.68002	5.50812e-05	37.395	0.695
Chr4	2595000	2595300	-1.10807	7.95921e-05	70.7933	18.4233
Chr1	4507500	4507800	-3.03141	9.9152e-05	61.78	0
Chr4	13294200	13294500	-2.31604	0.000164167	27.3133	0.346667
Chr5	23340000	23340300	-1.88669	0.000357563	57.2233	7.48667
Chr3	9217800	9218100	-1.80089	0.000477744	14.8167	0.346667
Chr1	8672700	8673000	-1.81516	0.00192191	19.26	0.593333
Chr3	17425500	17425800	-1.65881	0.00520634	18.7817	1.02667
Chr3	9713700	9714000	-1.78252	0.0190038	24.7633	2.29667
Chr1	10197000	10197300	-0.819595	0.0272174	93.4633	34.4533

## Sheet: Fig2D
Significant									Not Significant
Chr	start	stop	Log 2(mat nrpd1 +/-/WT)	padj	Average WT	Average mat nrpd1+/-			Chr	start	stop	Log 2(mat nrpd1 +/-/WT)	padj	Average WT	Average mat nrpd1+/-
Chr5	22391700	22392000	1.03567	1.02142e-09	305.127	644.997			Chr2	7005300	7005600	-0.613607	0.0513783	235.038	158.808
Chr3	8369700	8370000	-2.68004	4.96965e-06	95.4383	8.25833			Chr2	266100	266400	0.628958	0.0520508	84.8083	136.677
Chr5	14013600	14013900	0.946919	5.75962e-06	275.673	553.397			Chr4	1643100	1643400	0.620683	0.0524472	132.008	205.46
Chr2	6813000	6813300	0.836617	1.07285e-05	232.443	314.373			Chr2	6548700	6549000	0.619776	0.0524592	130.027	208.843
Chr2	4622700	4623300	0.998034	2.13693e-05	109.567	229.36			Chr2	6372900	6373500	-0.826704	0.0525002	64.2967	39.5033
Chr4	5561400	5561700	-0.910481	0.000170801	444.697	239.64			Chr3	16406100	16406400	0.712278	0.055733	101.263	152.862
Chr2	8529000	8529300	0.962611	0.000455033	58.59	123.56			Chr2	4302000	4302300	-0.508551	0.0580099	403.833	191.983
Chr1	12013200	12013500	1.0296	0.000638438	58.8967	141.09			Chr2	2610600	2610900	0.516419	0.0603212	230.35	297.88
Chr1	13463100	13463700	0.796045	0.000726559	114.813	206.663			Chr3	9702600	9702900	-0.100441	0.0630858	138.938	246.182
Chr4	1967700	1968000	0.851024	0.000838336	112.187	208.948			Chr2	4351200	4351500	-0.605224	0.0637617	66.2433	31.9333
Chr4	7520100	7521000	-0.994815	0.0010484	111.313	54.23			Chr4	13336500	13336800	0.69382	0.0669459	54.84	94.925
Chr2	1656300	1656600	0.847822	0.00130288	82.5817	154.802			Chr2	7145700	7146000	-0.720985	0.0695367	166.88	95.0517
Chr4	2258400	2258700	0.750131	0.00145284	364.823	662.87			Chr2	5056500	5056800	0.651856	0.0708924	115.77	193.932
Chr3	14233500	14233800	-0.961311	0.00218322	340.133	167.418			Chr5	10690200	10690500	0.529969	0.0757595	136.727	209.187
Chr3	10984800	10985100	0.883196	0.00259306	161.92	321.283			Chr1	16280400	16280700	0.561779	0.0761036	114.453	173.547
Chr3	22076400	22076700	0.917573	0.0027234	41.61	92.8433			Chr5	10428000	10428300	0.554773	0.0775781	98.8333	141.773
Chr3	11432700	11433000	0.590249	0.00295775	563.275	861.463			Chr5	19733400	19734000	0.576074	0.0780769	79.58	132.122
Chr2	6612000	6612300	-0.765012	0.0029995	269.827	152.623			Chr2	4652700	4653000	-0.814307	0.0807033	83.7933	42.39
Chr2	1422600	1423200	0.872457	0.00321399	73.74	144.553			Chr1	15988800	15989100	0.603876	0.0814737	93.4567	150.77
Chr2	2893800	2894100	0.726598	0.00369644	223.87	381.47			Chr5	10120500	10120800	-0.587891	0.082021	188.083	120.452
Chr2	9947400	9947700	-1.16139	0.00371918	53.86	16.9133			Chr3	15082800	15083100	0.387287	0.0841855	338.83	458.817
Chr4	2434200	2434500	1.08437	0.00490148	29.6867	73.3217			Chr3	16346700	16347000	0.637686	0.0846331	69.7417	113.272
Chr5	16409700	16410300	0.74365	0.00496395	90.0267	158.127			Chr5	13560300	13560600	-0.697848	0.0847438	83.7133	47.8583
Chr5	13467000	13467300	0.931725	0.00611855	63.0167	91.3167			Chr2	4267500	4267800	0.399375	0.0861139	563.702	750.993
Chr1	16355700	16356300	0.489236	0.00617033	4443.08	6300.2			Chr2	5942700	5943300	-0.657644	0.0886595	106.677	66.92
Chr2	4145700	4146300	-0.694445	0.00718769	328.717	188.983			Chr2	2535600	2535900	-0.615584	0.0886874	160.24	100.21
Chr3	11184600	11184900	-0.637779	0.00831028	235.58	119.04			Chr5	10713600	10713900	0.536888	0.089818	106.07	152.5
Chr3	14951400	14951700	0.626376	0.00898237	216.507	340.303			Chr2	11619600	11619900	0.571776	0.0929115	96.6667	149.57
Chr2	2538600	2538900	-0.575384	0.00928727	1769.26	1507.71			Chr3	14992500	14992800	0.500165	0.0939748	234.375	341.145
Chr3	14932500	14933100	0.779414	0.00991124	54.1633	99.2933			Chr1	13726800	13727700	-0.511969	0.100527	411.598	300.875
Chr2	5510400	5511000	0.624927	0.00996116	80.6067	181.06			Chr4	5518800	5519100	0.497987	0.101052	129.117	187.603
Chr2	8626800	8627100	0.755699	0.0101108	86.7067	154.46			Chr3	15561000	15561300	0.918291	0.10361	51.32	113.318
Chr2	5762700	5763000	-0.87859	0.0102669	123.333	61.775			Chr1	12071400	12071700	0.597899	0.103648	54.8567	94.0333
Chr5	9635700	9636000	0.759817	0.0106431	142.917	255.423			Chr4	2987700	2988000	-0.569805	0.105191	174.44	118.482
Chr2	10413300	10413600	0.594876	0.0106893	198.897	306.035			Chr3	10719300	10719900	0.470346	0.105906	166.437	234.573
Chr2	10410900	10411500	0.706577	0.010812	106.783	178.097			Chr5	13975200	13975500	0.411228	0.108523	526.957	709.98
Chr5	112800	113100	0.743526	0.0126904	85.5733	148.92			Chr5	10918200	10918500	-0.614796	0.109682	97.0333	60.1733
Chr3	18724800	18725100	-0.953257	0.0132411	60.6733	37.6			Chr3	8654400	8654700	0.554969	0.110317	101.337	129.893
Chr1	13762500	13762800	0.807546	0.0137286	78.05	142.663			Chr2	13879500	13879800	-0.791757	0.110617	56.08	29.98
Chr3	11820600	11820900	0.55551	0.015918	297.533	463.413			Chr3	15409500	15410100	0.542125	0.120114	94.5333	132.217
Chr1	17282400	17282700	0.566153	0.0161932	188.99	285.647			Chr2	5080500	5080800	-0.552921	0.12013	148.742	98.95
Chr3	12458400	12458700	0.57993	0.016652	198.09	335.503			Chr4	3809700	3810000	0.456557	0.120919	220.422	310.153
Chr3	12658500	12658800	0.831648	0.0173534	55.3867	107.355			Chr3	15943500	15944100	-0.525952	0.122651	176.82	117.647
Chr4	5475900	5476500	0.506006	0.0201687	483.223	656.587			Chr2	2456400	2456700	-0.715935	0.122749	41.7067	33.26
Chr1	10512600	10512900	0.753799	0.0203909	99.85	177.047			Chr3	11815800	11816100	0.411858	0.122866	323.783	475.737
Chr3	17503200	17503500	-1.15388	0.0208085	34.6733	11.31			Chr1	13248300	13248900	0.343967	0.125944	680.267	950.867
Chr1	15942000	15942300	0.69047	0.0234206	79.1833	135.19			Chr1	13240200	13240800	0.367624	0.1263	819.82	1068.97
Chr4	2793600	2793900	0.480223	0.0234773	297.54	437.09			Chr2	10636200	10636500	0.52738	0.127162	122.44	147.86
Chr5	13860900	13861200	0.865919	0.0244435	65.56	130.938			Chr3	17860500	17860800	0.738395	0.127673	39.0333	70.835
Chr4	1661100	1661700	0.467354	0.025316	839.143	1174.55			Chr1	15648600	15649200	-0.503732	0.127688	162.687	113.647
Chr2	6445500	6445800	0.882441	0.0265766	44.4083	89.7867			Chr2	3167400	3167700	0.552907	0.127908	80.64	125.267
Chr5	9442500	9442800	-0.672978	0.0268321	228.89	139.49			Chr4	1755900	1756200	0.690648	0.127988	61.1733	105.822
Chr4	6098400	6099000	0.834392	0.0269354	50.9767	97.47			Chr1	14287500	14287800	0.573047	0.133834	100.573	157.278
Chr4	1601700	1602000	0.523972	0.0273233	296.41	425.68			Chr3	16935300	16935900	-0.718377	0.135451	64.3533	36.9783
Chr4	2103300	2103600	0.952846	0.0286302	29.7183	66.1283			Chr4	2101200	2101500	0.608659	0.136527	58.0433	84.75
Chr4	486000	486600	0.761323	0.0318424	46.615	92.815			Chr5	13096500	13096800	-0.395912	0.140325	391.988	293.757
Chr5	9856800	9857100	0.681448	0.0321915	53.9533	102.68			Chr2	4870500	4870800	-0.017545	0.140563	84.5167	97.5833
Chr4	11148900	11149200	0.616861	0.0323338	128.75	203.423			Chr1	13524900	13525200	0.44916	0.141772	285.78	400.938
Chr5	9343500	9343800	0.584529	0.0334616	186.41	288.83			Chr3	17394900	17395200	0.52503	0.141837	152.792	229.415
Chr5	17520300	17520600	-0.804767	0.0346602	95.2183	51.0017			Chr3	11181600	11182200	-0.489289	0.142551	311.89	215.68
Chr2	5178600	5178900	0.722678	0.0378228	58.5867	102.803			Chr5	10761900	10762800	0.335224	0.143368	1117.22	1445.35
Chr5	10563900	10564500	0.460369	0.0378872	499.837	661.66			Chr3	16202400	16202700	-0.883534	0.143812	30.6067	12.43
Chr4	10748400	10748700	0.815003	0.0386025	41.1367	80.9333			Chr1	12703800	12704100	0.613292	0.14657	77.9267	128.413
Chr5	15809400	15809700	0.824172	0.0386319	35.0167	68.0267			Chr3	12641100	12641700	0.38641	0.147763	694.11	1049.3
Chr4	6688800	6689100	0.667732	0.0399189	62.7167	124.853			Chr2	1943700	1944000	0.776331	0.15003	111.273	259.623
Chr5	10700400	10701000	0.565574	0.0416754	357.213	640.327			Chr2	2021700	2022000	0.73487	0.150263	29.9683	54.51
Chr3	17928300	17928900	-0.641633	0.0421269	158.117	99.3467			Chr2	2223600	2224500	-0.397521	0.155052	893.195	682.47
Chr3	15475500	15476100	0.633984	0.0426666	76.1767	137.213			Chr1	12507000	12507300	0.6076	0.155081	67.355	110.117
Chr3	15561600	15562200	0.548298	0.0435148	131.11	182.573			Chr5	13659000	13659300	0.511376	0.155227	78.9967	122.597
Chr3	20652300	20652600	0.638922	0.0438762	160.013	254.3			Chr5	9939600	9939900	0.414545	0.156584	169.23	276.01
Chr5	7910700	7911000	0.661227	0.04413	69.985	115.842			Chr3	11714700	11715000	0.493646	0.157769	128.192	186.018
Chr3	15025200	15025800	0.469118	0.044389	367.527	516.08			Chr5	11037600	11037900	-0.080201	0.159377	176.237	175.383
Chr2	3802200	3802800	0.527463	0.0453333	157.947	239.187			Chr5	10776600	10776900	-0.399445	0.161692	95.4267	77.7767
Chr2	3784500	3784800	0.630379	0.0455992	85.705	137.272			Chr5	10912500	10913100	0.525276	0.162612	85.6233	134.26
Chr4	5670300	5670600	-0.750977	0.0468638	184.453	102.002			Chr5	10554000	10554300	0.441242	0.163542	190.913	263.287
Chr3	3587100	3587400	0.871489	0.0480025	26.79	55.095			Chr3	7903200	7903500	-0.930086	0.163802	23.1267	7.55667
Chr5	13689300	13689900	0.496007	0.0480677	275.377	396.893			Chr2	3801600	3801900	0.536509	0.164209	74.5233	111.31
									Chr5	13496100	13497900	0.390653	0.164209	250.627	370.037
									Chr4	2023800	2024100	0.500783	0.165164	136.15	226.537
									Chr5	15292500	15292800	0.53947	0.165694	120.522	183.445
									Chr1	13042800	13043100	0.550707	0.166214	180.537	277.573
									Chr2	1350000	1350900	0.171244	0.167014	101.852	155.762
									Chr2	7363800	7364100	-0.46158	0.169052	210.993	134.313
									Chr2	2213100	2213700	0.392151	0.170654	260.763	425.42
									Chr1	8621700	8622000	0.586036	0.171631	92.1417	147.462
									Chr2	6372000	6372300	0.479679	0.172908	118.457	173.333
									Chr2	3803100	3803700	0.513732	0.173299	80.7467	119.607
									Chr4	2245800	2246100	0.40291	0.176784	225.373	297.403
									Chr4	4090500	4091100	0.42647	0.17838	116.023	156.297
									Chr1	13288500	13288800	0.410475	0.17956	240.882	325.473
									Chr1	16863900	16864200	0.611374	0.179762	43.6433	71.1683
									Chr2	7202100	7202400	0.492367	0.180162	112.932	160.393
									Chr3	15624900	15625200	-0.767467	0.183224	112.227	64.5683
									Chr3	21130500	21131100	-0.501448	0.183399	128.607	88.2933
									Chr4	2262300	2262900	0.520441	0.184178	26.5933	39.2333
									Chr2	5462100	5462400	0.626161	0.185255	52.8	86.7
									Chr3	12872400	12873000	0.521111	0.185585	94.83	148.503
									Chr5	10563000	10563600	0.370125	0.186156	260.61	345.56
									Chr3	18488700	18489000	0.676128	0.187306	29.4233	51.7433
									Chr5	13638300	13638600	0.709877	0.187343	27.3417	49.625
									Chr1	13147500	13148100	0.657445	0.188316	41.44	72.6333
									Chr5	9697500	9697800	0.092752	0.188554	54.5383	47.5567
									Chr1	13643400	13644300	0.561387	0.188673	52.6467	85.6167
									Chr3	12833400	12834000	0.487501	0.191943	77.8267	116.877
									Chr2	5433900	5434200	-0.765264	0.192023	41.355	20.5633
									Chr2	1851000	1851300	-0.393169	0.194206	246.667	185.183
									Chr5	8810400	8810700	-0.666302	0.195722	73.7267	49.8633
									Chr1	16238400	16238700	-0.342712	0.199356	590.873	468.733
									Chr2	3009900	3010200	-0.537964	0.200569	92.4217	61.2183
									Chr5	10911000	10911600	0.390526	0.200729	327.593	481.227
									Chr3	14052300	14052600	-0.344228	0.201255	1321.39	1029.58
									Chr3	12573000	12573300	0.572354	0.201841	58.1933	85.6133
									Chr4	2117700	2118000	-0.090844	0.201889	34.74	49.2217
									Chr1	17544300	17544600	0.535067	0.203222	109.732	163.28
									Chr2	10650300	10650600	0.675059	0.2057	40.2133	67.71
									Chr1	16260300	16260600	-0.558264	0.208085	98.88	64.2217
									Chr2	1602300	1602600	0.409549	0.208758	237.347	314.793
									Chr1	15609900	15610200	-0.821987	0.209159	24.8533	10.8233
									Chr4	5126100	5126700	-0.421149	0.213757	391.157	287.753
									Chr4	4606200	4607100	-1.22308	0.213886	97.1633	32.7867
									Chr2	9005400	9005700	-0.565924	0.218763	110.892	75.89
									Chr2	1716000	1716600	0.393727	0.220908	223.847	298.283
									Chr2	4655700	4656000	-0.691761	0.222431	54.7533	31.8033
									Chr2	2950500	2950800	-0.606922	0.222636	134.463	85.5367
									Chr4	1780500	1780800	0.639825	0.223313	34.125	57.5867
									Chr4	5473800	5474100	-0.422177	0.224094	2255.94	1967.91
									Chr3	12263100	12264300	0.38989	0.224489	360.937	505.94
									Chr5	10822800	10823100	0.388132	0.226743	466.08	551.727
									Chr1	15971700	15972000	0.624075	0.228586	37.86	63.8833
									Chr2	6733200	6733500	0.581322	0.234696	240.545	323.928
									Chr1	13234200	13234500	0.432073	0.23755	191.243	269.96
									Chr3	11106300	11106600	0.623152	0.239162	41.2467	70.0767
									Chr2	3005100	3005400	0.636488	0.23923	44.9667	73.5533
									Chr4	4795800	4796100	0.562261	0.239431	47.4533	75.3667
									Chr4	3526500	3526800	-0.568248	0.239689	175.907	111.397
									Chr3	15740100	15740400	-0.00367	0.24133	102.168	137.208
									Chr3	12301800	12302100	0.693552	0.243711	78.1733	102.84
									Chr3	12625200	12625500	0.555141	0.246668	43.75	66.24
									Chr4	2782800	2783100	0.576833	0.250287	47.88	73.13
									Chr3	12608700	12609000	0.353416	0.251512	921.838	1177.86
									Chr2	4744800	4745400	0.532072	0.25181	49.8367	77.39
									Chr2	10278900	10279200	-1.02591	0.252233	85.785	33.47
									Chr2	9591600	9591900	0.545814	0.25409	65.1733	100.813
									Chr5	8451900	8452200	-0.605098	0.254226	55.2267	33.5867
									Chr1	16414500	16414800	0.56172	0.254293	145.137	198.753
									Chr5	13687500	13688400	0.318116	0.256762	523.87	659.03
									Chr2	1340700	1341000	0.633953	0.257595	37.095	62.0567
									Chr5	13518300	13518900	-0.373088	0.258408	662.893	503.68
									Chr1	13249800	13250100	0.456855	0.25842	103.737	146.05
									Chr2	7381500	7381800	-0.783084	0.258447	27.5633	13.465
									Chr1	13865700	13866900	-0.370034	0.258714	572.6	408.932
									Chr3	11822700	11823300	0.507047	0.260035	68.3267	101.08
									Chr5	10418400	10418700	0.33092	0.260035	389.087	494.927
									Chr4	8109300	8109600	0.648993	0.260462	37.4783	65.41
									Chr5	10533600	10533900	-0.55239	0.262903	104.08	81.9367
									Chr3	11826000	11826600	0.543119	0.264402	46.1333	72.4667
									Chr2	2222100	2223000	-0.39423	0.264403	2687.3	2885.12
									Chr1	17091600	17091900	0.45387	0.264578	83.8433	118.783
									Chr3	11371500	11372100	-0.413846	0.266638	200.95	148.177
									Chr4	5555400	5557200	0.320538	0.268927	748.897	1006.84
									Chr2	4542000	4542300	0.382884	0.277538	190.357	216.713
									Chr1	11366700	11367000	-0.0947965	0.27857	82.7467	81.8867
									Chr5	14933100	14933400	0.709754	0.27994	32.3733	56.9133
									Chr4	2244600	2244900	0.460411	0.281171	95.1033	133.05
									Chr3	12624600	12624900	0.583377	0.28247	71.2133	82.8733
									Chr4	2423400	2423700	0.417273	0.285756	62.1533	74.2233
									Chr2	2961900	2962200	-0.709679	0.286638	63.2	32.9633
									Chr3	11425200	11425500	0.417778	0.286983	48.8367	61.49
									Chr2	5939400	5942400	-0.290642	0.287223	888.97	946.213
									Chr1	12084000	12084300	0.335755	0.287954	204.51	291.393
									Chr1	13732500	13732800	-0.672704	0.289911	219.987	125.918
									Chr2	2192100	2192700	-0.442541	0.29	145.243	112.133
									Chr4	13038000	13038600	0.485411	0.290449	73.2417	101.17
									Chr4	6405600	6405900	0.530032	0.292158	15.6333	28.9733
									Chr5	17106900	17107200	-0.732982	0.292242	33.3217	17.3233
									Chr3	11770800	11771100	0.486546	0.295347	105.19	154.52
									Chr2	3930900	3932400	0.472916	0.296021	190.6	261.793
									Chr2	1912500	1912800	0.510201	0.297499	293.852	421.855
									Chr1	12282900	12283200	0.622545	0.298947	30.645	51.7983
									Chr5	19752600	19752900	0.535314	0.299183	40.8067	64.9367
									Chr5	9857700	9858300	-0.456608	0.299831	216.98	135.093
									Chr2	2319600	2319900	0.352916	0.299994	133.557	198.12
									Chr4	1509300	1509600	0.354762	0.300079	411.913	531.347
									Chr5	10569000	10569300	-0.508911	0.301448	107.54	78.7467
									Chr5	13893300	13893600	0.744713	0.301982	19.5767	36.4383
									Chr1	13479000	13479300	0.489364	0.302116	55.8867	98.1867
									Chr4	3773700	3774300	0.300762	0.302614	432.393	551.193
									Chr5	7032300	7032600	0.390952	0.305434	166.362	222.657
									Chr2	6196500	6196800	0.489013	0.307282	67.065	100.117
									Chr2	5899500	5899800	0.595288	0.307383	30.2133	48.9417
									Chr5	10531200	10531800	-0.648292	0.312572	53.78	27.55
									Chr2	9831000	9831300	0.33264	0.313068	44.6933	34.04
									Chr4	2866800	2867100	-0.350718	0.318661	498.593	384.753
									Chr5	10919700	10920000	-0.518034	0.31959	92.07	61.2867
									Chr5	13059000	13059300	-0.515014	0.320147	70.99	47.0567
									Chr5	10701300	10701900	0.357345	0.320375	336.387	408.12
									Chr2	4101900	4102200	0.492663	0.321345	102.42	154.618
									Chr3	13988700	13989000	0.751682	0.321956	50.3217	99.54
									Chr1	13477500	13477800	-0.0699075	0.322032	66.92	77.145
									Chr3	11442600	11444700	0.31798	0.322299	344.798	406.193
									Chr1	13587900	13588200	-0.795856	0.322617	14.8	5.095
									Chr2	5589900	5590200	-0.330703	0.322739	1033.32	807.945
									Chr4	1595100	1595700	-0.415946	0.324063	265.157	268.093
									Chr1	17197500	17197800	-0.522884	0.324501	81.8583	54.7883
									Chr1	17316900	17317200	0.457293	0.324761	73.255	104.563
									Chr3	11472600	11473200	0.328943	0.325163	206.18	274.893
									Chr2	5951100	5951400	-0.668723	0.325384	50.7283	27.365
									Chr3	11772000	11772300	0.38574	0.328327	118.45	171.963
									Chr2	2194800	2195100	-0.232229	0.333584	199.777	170.883
									Chr4	4844400	4844700	-0.213727	0.334758	316.627	269.493
									Chr5	10988100	10988700	0.364834	0.334808	125.407	180.35
									Chr5	10756200	10756800	0.272804	0.334819	1214.83	1396.96
									Chr1	13861200	13862100	0.292899	0.337851	1123.59	1604.64
									Chr2	4372800	4373100	-0.247513	0.338271	229.52	250.653
									Chr2	10728600	10729200	-0.586798	0.338347	48.4133	31.0633
									Chr4	1292100	1292400	-0.724239	0.340088	109.93	53.23
									Chr1	16706400	16706700	0.43988	0.34065	91.7	129.937
									Chr5	13239300	13239600	0.594696	0.340824	52.87	91.645
									Chr2	8183100	8183400	0.758991	0.342498	9.75667	22.2467
									Chr3	11769300	11769600	0.391186	0.344191	106.732	142.318
									Chr5	13978500	13979100	0.281364	0.34557	808.143	839.91
									Chr5	17985900	17986800	0.468106	0.345694	62.29	90.5817
									Chr1	12898500	12898800	0.697588	0.346364	11.3417	22.4233
									Chr3	12135600	12135900	-0.369491	0.347138	546.887	400.983
									Chr5	12274200	12275100	0.174355	0.348363	214.72	257.567
									Chr2	6006300	6006600	-0.40285	0.352567	166.313	123.64
									Chr5	17003400	17003700	0.35016	0.353035	207.507	277.55
									Chr5	13388100	13388400	0.407684	0.353765	179.777	250.26
									Chr2	2969100	2969400	0.461141	0.354398	102.935	151.25
									Chr5	13626000	13626300	-0.574549	0.356955	35.02	18.0333
									Chr1	13759500	13759800	0.513407	0.357755	48.66	73.24
									Chr5	17221800	17222100	-0.412926	0.358266	197.33	151.733
									Chr4	1192800	1193100	-0.519384	0.359086	65.5683	43.3
									Chr4	12723300	12723600	0.678253	0.35923	65.1533	128.063
									Chr5	9346500	9347100	-0.319767	0.36068	494.153	382.573
									Chr5	16556400	16557000	-0.608784	0.36068	28.65	15.2417
									Chr2	6544800	6545700	0.519589	0.361276	76.8483	97.1067
									Chr4	1848000	1848300	0.547558	0.361947	88.21	121.23
									Chr2	6472500	6473100	0.427445	0.362051	87.5667	122.35
									Chr1	16259700	16260000	0.576513	0.362228	244.288	436.248
									Chr5	22621800	22622100	-0.387383	0.362314	135.043	101.5
									Chr3	11227200	11228700	0.160564	0.36295	889.047	998.18
									Chr4	2049900	2051400	-0.505308	0.363377	403.028	397.137
									Chr1	16324200	16325700	0.263648	0.363761	59.2767	74.27
									Chr3	15078000	15078300	-0.349598	0.364046	298.57	225.82
									Chr1	16614300	16614600	-0.107337	0.365084	82.845	96.275
									Chr2	1279800	1280100	0.401492	0.365356	68.6167	86.5067
									Chr4	4221300	4221900	-0.439463	0.369017	120.083	85.13
									Chr1	13746000	13747200	0.256808	0.371069	346.17	456.887
									Chr3	11980500	11981400	0.494784	0.371339	51.11	74.1367
									Chr4	4163100	4163400	0.446001	0.371347	79.0217	113.548
									Chr4	6880800	6881700	0.500007	0.374563	46.175	71.49
									Chr1	13998900	13999500	0.379891	0.378076	114.63	153.06
									Chr4	862800	863100	-0.416193	0.378875	88.9933	59.63
									Chr5	19018800	19019100	0.382716	0.378875	107.41	144.333
									Chr3	13531800	13532400	0.376288	0.37923	73.26	124.29
									Chr2	1839900	1840800	-0.108209	0.379337	327.563	350.35
									Chr2	10909500	10909800	0.632791	0.380141	18.1633	32.7433
									Chr3	13259400	13259700	-0.615655	0.381041	33.6633	12.7733
									Chr5	10935300	10935600	0.5484	0.381259	56.8733	94.3217
									Chr2	4751400	4751700	-0.176996	0.382665	99.26	86.14
									Chr2	3033900	3034200	0.418763	0.383782	73.7883	100.548
									Chr5	14106900	14107200	-0.527719	0.383877	79.2583	50.6733
									Chr2	5427000	5429400	0.288264	0.38507	354.84	430.042
									Chr4	12052500	12052800	-0.07705	0.386487	50.4833	52.2433
									Chr1	16558800	16559100	0.391446	0.38706	99.5567	132.22
									Chr4	4845900	4846200	0.0195525	0.388199	45.24	49.0617
									Chr2	6450900	6451200	0.577376	0.38929	31.4683	49.2083
									Chr4	1956000	1956300	-0.154239	0.390515	112.267	109.27
									Chr1	17016600	17017200	0.483511	0.391116	45.5567	67.0533
									Chr5	17304300	17304600	0.445576	0.391556	55.6967	79.0617
									Chr5	10902600	10902900	0.348549	0.392582	215.157	272.843
									Chr4	237300	237600	0.329627	0.393846	181.77	231.207
									Chr2	4341000	4341300	0.0473112	0.394075	21.2833	22.14
									Chr4	8707200	8707500	-0.0605485	0.394238	110.697	85.6267
									Chr3	11777700	11778300	-0.320191	0.398193	279.637	189.6
									Chr5	17058900	17059200	0.576504	0.398537	23.9617	38.5983
									Chr5	12660000	12660300	-0.264067	0.398939	313.63	259.03
									Chr2	3799200	3799500	0.404592	0.39986	90.0067	120.723
									Chr5	14614800	14615100	-0.40887	0.400758	219.74	172.62
									Chr1	16008900	16009800	0.546802	0.401806	46.44	49.61
									Chr5	5792100	5792400	0.457832	0.401908	54.88	79.04
									Chr1	17019900	17020200	0.433221	0.40228	64.4617	90.815
									Chr3	11229600	11230800	0.270112	0.402973	1506.97	1520.73
									Chr5	9091500	9092100	0.429987	0.403596	69.19	95.3733
									Chr4	2102400	2103000	0.532649	0.403861	42.8833	62.7367
									Chr3	15084900	15085200	0.283901	0.406419	697.043	879.202
									Chr1	16250100	16251000	0.319099	0.407709	324.473	408.953
									Chr2	4317900	4318500	0.484342	0.408703	40.6833	59.9667
									Chr3	11715300	11715600	0.653382	0.410855	179.632	360.787
									Chr5	10706100	10706400	-0.313462	0.411625	155.477	152.775
									Chr3	11473500	11473800	0.306859	0.411732	328.952	412.995
									Chr3	15086700	15088500	0.191862	0.412459	486.15	573.54
									Chr3	14763300	14763600	0.420241	0.413031	91.1067	126.61
									Chr1	8237100	8237400	-0.695854	0.414966	15.2233	6.59
									Chr2	4545300	4545600	-0.446541	0.415138	115.828	80.2483
									Chr5	10772400	10773000	-0.360841	0.417564	190.993	144.88
									Chr1	16005900	16006200	0.360425	0.41781	267.342	344.437
									Chr4	3521100	3521400	0.414212	0.422384	97.4717	141.908
									Chr2	4268700	4269000	0.456968	0.423124	107.255	164.203
									Chr5	9938100	9938700	0.504593	0.423277	40.43	61.3467
									Chr1	15960000	15960300	-0.551704	0.423601	54.3633	33.0767
									Chr2	1199700	1200000	0.475934	0.423671	43.0233	63.1517
									Chr1	17415600	17415900	0.495004	0.424224	41.85	48.6767
									Chr4	4097100	4097400	0.327082	0.424304	194.647	249.383
									Chr3	15394800	15395100	0.396259	0.424466	103.407	129.71
									Chr2	1313100	1313400	0.484057	0.424478	83.44	123.842
									Chr3	15635100	15637500	0.242622	0.424513	3533.45	4023.19
									Chr5	12588000	12588300	0.109794	0.425463	31.6567	24.64
									Chr2	2526300	2526600	0.188892	0.426711	142.332	186.347
									Chr2	3158100	3158400	0.47017	0.4279	72.955	112.12
									Chr2	9978900	9979500	-0.49285	0.428208	53.6467	32.5167
									Chr4	5190600	5191500	0.482775	0.43069	49.31	74.4667
									Chr2	4656900	4657500	0.331779	0.430887	136.71	187.247
									Chr5	16178100	16178700	0.315103	0.431487	213.487	266.937
									Chr3	13302600	13302900	0.370123	0.432207	105.29	107.293
									Chr5	10696800	10697100	0.487474	0.432502	37.2333	54.7933
									Chr2	1344000	1344600	-0.457147	0.433864	126.67	101.343
									Chr2	4747800	4748100	-0.0568767	0.433889	65.8067	73.33
									Chr5	11549400	11549700	0.403039	0.433964	54.8933	62.8733
									Chr3	3685500	3686100	-0.510428	0.43455	51.54	25.75
									Chr4	5474700	5475300	-0.256321	0.43468	4118.87	3429.83
									Chr3	11892900	11893200	0.25442	0.434772	66.905	100.542
									Chr5	10920900	10921500	-0.26935	0.435133	994.717	844.933
									Chr5	10818300	10818600	-0.310416	0.437011	179.488	149.355
									Chr3	12238200	12238800	-0.578931	0.437123	174.38	108.983
									Chr3	15132600	15133200	0.305093	0.43742	1048.18	1354.78
									Chr4	4640700	4641000	0.421512	0.438132	113.433	171.902
									Chr3	14306100	14306700	0.244462	0.439293	959.787	1141.92
									Chr2	2460600	2460900	0.131051	0.440285	106.957	147.48
									Chr2	6804900	6805200	-0.655234	0.440294	20.9633	10.4767
									Chr1	16770000	16771200	-0.178473	0.440311	480.132	419.418
									Chr3	16267500	16267800	-0.662934	0.440556	21.4017	12.3
									Chr3	11888400	11889300	-0.639034	0.442617	16.965	8.70167
									Chr5	11542500	11543700	0.374207	0.443033	81.3067	95.3567
									Chr1	12930300	12930600	0.279417	0.443292	561.125	600.46
									Chr1	8578200	8578500	0.105683	0.444342	80.095	107.355
									Chr2	5160300	5160600	0.33933	0.445644	172.552	215.817
									Chr2	2949900	2950200	0.360594	0.446893	492.853	562.54
									Chr1	12508500	12508800	0.357285	0.447867	107.768	140.677
									Chr3	9576300	9576600	0.512906	0.44954	39.3683	63.7383
									Chr1	16172400	16173000	0.286354	0.451064	141.16	184.65
									Chr4	2314500	2315100	-0.29519	0.451335	100.023	76.0633
									Chr2	6888000	6888300	0.347588	0.451809	113.567	149.553
									Chr5	13608900	13609200	-0.518895	0.452533	45.0517	28.885
									Chr5	16051200	16051500	0.055159	0.453165	292.34	304.91
									Chr2	2264100	2265000	-0.427154	0.454139	79.2833	37.3633
									Chr1	4094400	4094700	0.202625	0.454668	251.942	375.827
									Chr5	10554900	10555200	-0.491897	0.454769	76.0833	52.4933
									Chr3	17059500	17059800	0.327074	0.454954	134.138	173.447
									Chr3	15871800	15872400	-0.567176	0.45548	29.33	17.79
									Chr5	9302400	9303000	-0.407263	0.455701	127.28	97.65
									Chr5	9751500	9752700	0.291372	0.456242	1704.64	2091.5
									Chr2	2871000	2871300	-0.0427303	0.456937	221.793	262.193
									Chr1	12519600	12519900	-0.664553	0.457262	17.15	8.02
									Chr1	13908000	13908300	0.264584	0.458618	833.67	1087.11
									Chr2	2343600	2343900	-0.664745	0.460666	12.15	4.52
									Chr3	17775300	17775600	0.371306	0.461421	327.198	478.797
									Chr3	15958200	15958500	0.49269	0.461629	33.8917	51.5283
									Chr2	8882400	8882700	-0.499696	0.461764	41.57	25.5567
									Chr4	5123100	5124000	-0.52697	0.462939	107.837	78.9033
									Chr3	15219300	15219600	0.398426	0.463568	102.022	144.818
									Chr1	1598400	1598700	-0.583792	0.463958	26.1767	14.9367
									Chr5	24542700	24543000	0.506968	0.464043	216.058	277.153
									Chr5	10233300	10233600	0.455455	0.464604	56.9833	81.255
									Chr3	12797100	12797700	0.323008	0.464651	272.513	350.05
									Chr2	10842000	10842300	-0.552479	0.465655	32.7967	19.92
									Chr5	14076000	14076300	0.289639	0.466452	219.497	270.8
									Chr5	21225000	21225300	0.50775	0.466933	21.6633	39.42
									Chr5	10510200	10510800	0.506718	0.466947	63.6767	98.2867
									Chr1	13291800	13292100	0.459113	0.468366	38.4333	54.59
									Chr2	5836500	5836800	0.463491	0.469542	95.345	159.052
									Chr4	185100	185400	0.405835	0.469637	102.247	151.928
									Chr4	1899000	1899300	0.375139	0.47034	82.99	106.61
									Chr3	12847800	12848100	0.419029	0.471257	54.9633	87.1333
									Chr1	13263600	13263900	0.402929	0.471919	69.79	97.2
									Chr3	11477400	11477700	-0.321346	0.474609	150.92	121.37
									Chr3	11483100	11483700	0.321536	0.474752	148.863	191.35
									Chr1	17008500	17008800	0.574969	0.474952	23.345	37.44
									Chr4	3767700	3768300	-0.27665	0.475836	492.087	402.14
									Chr1	17104800	17105100	0.461785	0.476375	25.39	38.2367
									Chr5	10836300	10836600	-0.365573	0.476815	215.15	166.188
									Chr2	6001500	6001800	0.366084	0.47765	92.0283	121.202
									Chr1	14043600	14043900	0.127711	0.478254	126.423	142.7
									Chr3	15627900	15628200	0.326358	0.478414	188.148	235.715
									Chr4	3805800	3806100	0.296497	0.478771	362.57	445.077
									Chr5	20640300	20640600	-0.502745	0.479587	170.458	91.38
									Chr1	17664600	17665200	0.358728	0.479994	118.163	167.6
									Chr2	4767000	4767600	-0.319618	0.481047	246.083	213.783
									Chr5	13492200	13492500	0.304811	0.481047	187.283	224.713
									Chr3	17862000	17862300	0.386109	0.481931	51.4167	77.9367
									Chr3	15999900	16000200	0.331319	0.483198	132.987	169.282
									Chr3	14592600	14592900	0.33111	0.483775	109.887	140.983
									Chr1	13311600	13312200	0.31273	0.484599	101.797	140.887
									Chr4	10189200	10189500	0.379758	0.484638	145.123	222.057
									Chr3	15900000	15900300	0.237385	0.48491	578.35	884.387
									Chr1	13461600	13462200	0.3888	0.485745	72.5767	98.8833
									Chr5	724500	725700	0.450045	0.486412	45.7117	65.5367
									Chr3	11438700	11439000	0.261457	0.487459	808.38	1000.39
									Chr2	721800	722100	0.404612	0.489288	30.75	49.8133
									Chr1	17005200	17005800	0.281437	0.489367	211.973	261.053
									Chr1	10920600	10920900	-0.44343	0.491754	56.58	36.1433
									Chr2	4766400	4766700	-0.0673559	0.491864	172.737	131.437
									Chr1	16476900	16477200	0.35077	0.492243	184.38	279.055
									Chr2	5431500	5431800	0.39831	0.493494	130.207	191.297
									Chr2	2580000	2580300	0.279145	0.494174	267.113	348.36
									Chr2	2886300	2886600	0.398898	0.494697	68.8467	91.0917
									Chr3	16113600	16113900	0.175764	0.49493	47.9567	44.2733
									Chr2	1311600	1312200	0.451395	0.495517	40.95	59.46
									Chr4	1629300	1629600	0.516847	0.495634	96.83	181.315
									Chr4	4143900	4144200	-0.376699	0.496058	79.0933	53.935
									Chr5	12557700	12558000	0.523611	0.496872	23.0167	35.6383
									Chr4	1593900	1594200	-0.11025	0.497117	331.237	318.597
									Chr2	3585600	3586500	-0.278287	0.497248	224.552	187.947
									Chr2	6390300	6390600	0.416803	0.497426	50.6867	70.1217
									Chr5	16650000	16650300	0.407989	0.497626	37.27	58.53
									Chr4	1770000	1770600	0.345992	0.497941	134.753	167.817
									Chr1	13480200	13480500	0.44392	0.499059	50.1133	65.0967
									Chr3	14989200	14992200	0.255706	0.499712	327.013	394.117
									Chr5	12093900	12094200	0.314987	0.500021	40.6533	61.6867
									Chr2	2293500	2294400	0.481736	0.500684	66.9533	59.0267
									Chr2	5609400	5610300	0.198336	0.500702	293.143	340.693
									Chr3	11781300	11781600	0.274902	0.50108	217.003	266.993
									Chr3	14684100	14684400	0.319421	0.501927	165.807	206.823
									Chr4	8796300	8796600	0.532595	0.502349	14.1567	27.18
									Chr3	11200200	11200500	0.409649	0.502815	52.3567	73.2067
									Chr5	15645600	15645900	0.41411	0.502944	58.875	91.355
									Chr2	3748500	3748800	0.510358	0.503891	26.9883	40.8817
									Chr1	15890700	15891000	0.408438	0.504437	73.9267	104.515
									Chr2	5835600	5835900	0.0555736	0.504829	62.5067	44.7333
									Chr3	14303700	14305200	-0.261651	0.506315	291.168	260.043
									Chr2	1219500	1220100	-0.380881	0.506593	83.4267	73.5433
									Chr2	7836300	7836600	0.559855	0.508304	12.97	23.2967
									Chr1	16249500	16249800	0.276092	0.508953	357.357	433.842
									Chr2	4650300	4650600	0.185001	0.509687	754.48	868.877
									Chr5	10529100	10529700	-0.305049	0.510838	556.907	447.33
									Chr2	1768500	1769100	0.3462	0.511026	72.2433	80.2967
									Chr3	12795300	12795600	-0.406756	0.511076	36.7617	24.3033
									Chr2	10353300	10353600	0.312789	0.511692	81.585	111.813
									Chr1	16599000	16599900	0.0714798	0.51233	242.763	329.877
									Chr3	8758500	8758800	-0.339622	0.512469	89.31	55.3967
									Chr5	10779900	10780200	0.248853	0.512691	141.51	187.84
									Chr5	10066800	10067100	-0.436313	0.51407	97.07	67.7067
									Chr3	11775300	11775900	-0.397695	0.515334	70.7867	60.5167
									Chr2	1776000	1776300	0.255787	0.515415	35.2267	56.6433
									Chr1	8573400	8573700	0.326289	0.515634	111.343	153.73
									Chr2	6902400	6903000	-0.28648	0.516711	489.747	395.107
									Chr2	8643900	8644200	-0.433347	0.517811	54.0133	37.88
									Chr4	2796300	2796600	-0.370148	0.518246	97.8767	65.625
									Chr4	10359600	10359900	-0.300149	0.519314	207.073	164.765
									Chr3	13237200	13237500	-0.348847	0.519843	77.0867	47.3533
									Chr4	2316600	2317200	-0.370947	0.520382	89.6967	68.6333
									Chr2	3000600	3000900	0.403023	0.522153	56.7167	78.3067
									Chr2	1295400	1296000	-0.378317	0.522271	92.1667	63.13
									Chr2	3598500	3598800	0.190481	0.522593	140.483	182.522
									Chr3	18647100	18647400	0.357241	0.524332	82.1217	106.267
									Chr4	2985300	2985900	-0.147716	0.524351	51.3333	46.25
									Chr1	13236900	13237500	-0.37008	0.526822	139.927	104.837
									Chr5	9748800	9749400	-0.368354	0.526838	154.033	106.55
									Chr1	13909200	13910100	-0.0318935	0.527717	720.605	687.677
									Chr4	1662300	1664700	-0.264958	0.529218	332.468	259.38
									Chr1	17414100	17414400	0.117457	0.530275	33.7367	38.7633
									Chr3	11739600	11740200	0.379358	0.531904	55.1367	74.1
									Chr1	13284600	13284900	0.344441	0.532686	86.1167	112.093
									Chr5	11029800	11030100	-0.498656	0.533863	33.4933	20.8
									Chr4	664200	664500	0.398666	0.535774	61.31	84.0833
									Chr1	12593700	12594000	-0.409901	0.536076	81.265	59.5583
									Chr2	4374900	4375200	-0.394773	0.53661	83.56	62.2117
									Chr5	11637000	11637600	0.252417	0.537683	246.377	300.277
									Chr5	13863000	13863300	-0.578924	0.538921	23.5367	17.0533
									Chr5	10854900	10855200	-0.318622	0.539004	1096.77	864.25
									Chr1	16036500	16036800	0.488889	0.539571	21.7433	33.065
									Chr1	8043900	8044200	0.368139	0.542063	35.8667	51.5417
									Chr1	13282200	13283100	0.278535	0.542489	100.735	108.537
									Chr2	2331600	2331900	0.346748	0.543187	90.7067	110.99
									Chr5	7728900	7729200	0.422801	0.543546	35.7133	50.7183
									Chr2	1464600	1465200	0.396711	0.544261	37.7467	49.8
									Chr3	15667500	15667800	0.125668	0.545129	36.04	52.0317
									Chr5	9349200	9349500	0.341412	0.545519	44.8667	73.9467
									Chr3	11426700	11427000	-0.144773	0.545561	230.165	225.042
									Chr5	13094100	13094400	-0.346287	0.545894	97.3983	73.9467
									Chr2	2514900	2516400	0.315786	0.547537	128.58	157.543
									Chr5	16857000	16857600	0.344621	0.547864	81.2833	108.09
									Chr1	16778100	16778400	0.198799	0.548563	20.6767	31.1183
									Chr4	1586400	1586700	0.374852	0.549442	53.0933	76.94
									Chr4	3513600	3513900	0.217579	0.54964	868.093	1013.19
									Chr3	11224500	11225100	0.208798	0.550427	877.127	1019.68
									Chr2	7680900	7681800	0.403774	0.550472	43.4567	61.1567
									Chr4	4817700	4818000	-0.227661	0.551617	731.795	621.192
									Chr3	8872500	8873100	0.400808	0.551655	49.0233	68.77
									Chr3	16356900	16357200	-0.289075	0.552399	207.392	161.033
									Chr5	9912300	9912600	0.520336	0.55518	17.12	28.02
									Chr5	14801100	14801400	0.384981	0.555701	46.8417	65.0083
									Chr5	10746300	10746600	-0.27561	0.556026	52.625	41.2333
									Chr4	5928600	5929200	0.30508	0.55687	50.5667	61.1633
									Chr5	12547800	12548100	0.366678	0.556957	83.5867	101.857
									Chr2	6380100	6380400	-0.418011	0.557678	121.842	106.37
									Chr5	13472400	13472700	0.240517	0.558282	501.713	470.073
									Chr1	16466700	16467000	0.053894	0.558377	55.3633	74.5733
									Chr5	12547200	12547500	0.335967	0.559366	91.66	118.703
									Chr3	15833400	15833700	-0.370759	0.559698	37.1	24.83
									Chr2	10160100	10160400	0.378856	0.560182	67.8617	92.715
									Chr2	8454900	8455200	-0.425133	0.56048	40.9983	26.0717
									Chr1	16563900	16564200	0.461079	0.560666	27.9567	41.51
									Chr2	5055600	5055900	-0.542245	0.562236	30.7367	14.1
									Chr2	899100	899400	-0.238943	0.562275	481.648	389.157
									Chr1	11027400	11028000	0.463256	0.562803	34.9567	43.2433
									Chr3	12793200	12793500	0.28715	0.563039	249.533	388.78
									Chr5	18499800	18500100	0.45478	0.563189	37.2033	54.67
									Chr2	4033500	4033800	0.288157	0.563195	154.535	190.572
									Chr1	15894600	15894900	0.341872	0.565169	63.56	83.3167
									Chr2	5186700	5187000	0.218581	0.565308	74.7583	98.59
									Chr2	2330400	2330700	-0.210089	0.565475	74.9067	76.17
									Chr2	11076300	11076600	-0.357545	0.566419	27.0333	23.6467
									Chr2	1210500	1211400	-0.391618	0.567464	54.0933	53.46
									Chr4	1759800	1760400	-0.242966	0.567556	122.563	91.27
									Chr5	13683600	13685400	0.128884	0.567758	489.407	431.603
									Chr5	10566300	10567500	0.113655	0.567968	680.212	890.587
									Chr2	98400	98700	0.358577	0.568109	58.2333	77.2117
									Chr2	3749100	3749400	0.177638	0.568188	137.882	170.13
									Chr2	10996500	10996800	-0.319575	0.569305	47.0633	33.9467
									Chr3	15228300	15228600	0.252609	0.569782	82.5333	112.93
									Chr3	11615700	11616000	-0.353824	0.569897	118.028	88.36
									Chr2	7889400	7889700	0.452115	0.569948	25.3433	37.1967
									Chr2	2952900	2953200	0.233066	0.569962	287.092	339.137
									Chr2	1981200	1982100	0.345027	0.571871	49.255	88.525
									Chr4	4641600	4642200	0.08886	0.572974	272.307	319.693
									Chr4	591600	591900	0.334081	0.57311	129.25	168.623
									Chr5	9344700	9345000	-0.257351	0.57355	417.57	352.998
									Chr4	2235300	2235600	0.20153	0.573622	120.04	136.673
									Chr4	5698500	5699400	0.394929	0.573665	43.0267	63.6067
									Chr3	11442000	11442300	-0.286012	0.573723	190.487	152.903
									Chr3	14301900	14303100	-0.335031	0.574622	109.873	86.7033
									Chr2	5432700	5433000	-0.287293	0.575218	430.64	370.807
									Chr1	12510300	12510600	0.302261	0.575297	122.712	155.203
									Chr2	1879800	1880100	0.385531	0.575393	64.3967	82.1767
									Chr4	2075400	2075700	0.127948	0.576091	845.15	926.713
									Chr2	1002000	1002300	0.516206	0.576183	16.0983	27.0317
									Chr2	7441200	7441500	0.281538	0.576725	205.537	232.89
									Chr3	7318200	7318500	0.267923	0.577232	35.155	50.7767
									Chr4	1596600	1598400	0.190052	0.577455	1596.33	1867.19
									Chr1	13525500	13525800	0.119151	0.577929	202.413	225.272
									Chr2	5295300	5295600	0.353351	0.579202	56.4583	74.9067
									Chr3	13156200	13156500	0.408271	0.580305	50.04	67.66
									Chr2	3012600	3012900	0.274115	0.580802	129.51	157.967
									Chr3	11372400	11372700	-0.323674	0.580826	145.2	104.417
									Chr2	5156100	5156400	0.248226	0.581055	215.758	260.625
									Chr3	15071700	15072000	0.376252	0.582405	44.8367	62.81
									Chr3	11243100	11243700	0.348255	0.58249	45.43	67.3067
									Chr2	4361400	4361700	0.319863	0.582986	79.9367	106.337
									Chr2	5121000	5121300	-0.187112	0.58314	226.287	314.953
									Chr3	11981700	11982300	-0.285134	0.583179	170.353	159.877
									Chr1	7980900	7981200	0.251062	0.584043	50.3933	72.6983
									Chr5	12689100	12689400	0.379964	0.585352	51.2867	66.69
									Chr3	18725700	18726000	-0.435143	0.585917	39.4317	27.125
									Chr5	12701100	12701400	0.490673	0.585932	16.9833	27.1733
									Chr2	2237100	2237400	0.294097	0.585936	93.9	119.283
									Chr5	12262500	12262800	0.367821	0.586819	55.2867	73.905
									Chr3	20751300	20751600	0.238109	0.587202	36.91	47.995
									Chr2	5164500	5164800	0.206655	0.588079	134.125	169.095
									Chr5	10844400	10845000	0.154107	0.588736	1190.96	1411.85
									Chr1	12591900	12592200	0.330646	0.589374	96.665	110.605
									Chr2	4652100	4652400	-0.358322	0.589788	62.3183	45.3233
									Chr3	15654900	15655200	0.174175	0.592027	45.0917	61.9217
									Chr1	16449600	16452000	0.202997	0.592197	424.29	498.378
									Chr4	7762500	7762800	-0.342863	0.592253	85.8033	67.8633
									Chr1	16343100	16343400	-0.267606	0.593345	306.34	261.293
									Chr2	4752300	4752600	-0.525632	0.593371	9.41	3.92
									Chr2	5425500	5426100	-0.124986	0.593593	137.19	106.403
									Chr3	12612300	12612900	-0.232544	0.593593	304.467	225.717
									Chr2	6380700	6381000	0.257601	0.593923	55.23	75.965
									Chr2	4023000	4023300	0.335238	0.594245	50.8967	72.2933
									Chr2	2952300	2952600	0.118624	0.594327	234.722	272.54
									Chr3	7981500	7981800	-0.37917	0.594603	44.54	31.565
									Chr5	13488300	13488600	-0.375661	0.594707	68.7683	51.19
									Chr1	12922800	12923100	-0.469033	0.594781	29.5967	19.6133
									Chr3	11134200	11134800	0.218194	0.595554	14.44	14.99
									Chr5	10914300	10914600	0.295007	0.596579	123.908	155.295
									Chr5	13068600	13068900	-0.0548769	0.597056	41.8567	48.56
									Chr1	15889200	15889500	-0.26931	0.59714	32.0867	23.75
									Chr1	16257900	16258500	-0.519344	0.597225	25.62	15.2033
									Chr5	13810500	13810800	-0.273046	0.598418	85.515	71.7967
									Chr1	11459400	11459700	-0.473837	0.599069	31.1033	19.94
									Chr3	15562500	15563100	-0.282491	0.600468	97.3833	54.0867
									Chr4	8794500	8794800	0.556517	0.600595	5.93167	12.0367
									Chr1	15921000	15921300	0.382287	0.6011	46.48	73.1433
									Chr1	16065900	16066200	0.190382	0.601271	414.893	463.813
									Chr1	13526400	13526700	0.297674	0.601988	120.943	150.493
									Chr1	16317900	16318200	0.343867	0.602773	59.7133	77.3533
									Chr3	14765100	14765700	-0.271046	0.603995	63.2233	59.36
									Chr1	13716300	13716600	0.236016	0.60568	151.395	175.713
									Chr5	10835100	10835700	0.249869	0.605905	432.307	513.697
									Chr2	9902100	9902400	0.442676	0.606074	23.57	34.1617
									Chr3	15894300	15895200	-0.102554	0.606152	117.533	213.213
									Chr5	14616600	14617200	-0.377736	0.606718	58.31	42.94
									Chr2	4298400	4298700	0.0136025	0.606806	185.16	198.297
									Chr3	11780400	11780700	0.223564	0.607272	56.4233	80.1433
									Chr2	237900	238200	0.369991	0.607665	67.0983	87.9483
									Chr2	2946000	2949600	0.11993	0.608474	135.697	137.787
									Chr2	10359900	10360200	0.39567	0.608758	35.6633	49.2317
									Chr2	7073100	7073400	-0.160804	0.60948	61.0783	55.545
									Chr2	2666400	2667000	-0.442205	0.609583	38.4867	28.4033
									Chr5	14800200	14800800	0.427898	0.610869	29.2133	40.2967
									Chr4	2535900	2536200	-0.381273	0.61195	58.395	46.2167
									Chr5	13347000	13347300	0.324218	0.614224	54.6233	69.37
									Chr1	13498500	13499100	-0.267713	0.614288	97.5533	106.693
									Chr3	11743200	11743500	0.43189	0.614347	30.6633	50.2967
									Chr1	13107600	13108200	0.27397	0.614374	153.593	188.99
									Chr1	16354200	16354500	-0.320148	0.61481	1041.99	783.847
									Chr3	15350700	15351000	0.265742	0.615016	108.355	128.768
									Chr4	2826300	2826600	0.186705	0.615102	895.212	1026.38
									Chr5	14313300	14313600	-0.453927	0.615139	38.4933	25.675
									Chr4	1853700	1854300	0.0354966	0.615282	119.46	121.293
									Chr5	14557500	14557800	0.372854	0.615501	44.3017	59.82
									Chr2	8414100	8414400	0.2097	0.616301	47.8117	63.5433
									Chr3	15021900	15023700	0.263587	0.616565	424.717	533.48
									Chr5	13493100	13494000	0.154291	0.617366	212.39	210.853
									Chr4	8262300	8262900	0.252723	0.618547	550.457	595.51
									Chr3	15449700	15450000	0.370271	0.618714	53.5433	71.8667
									Chr3	11621400	11621700	0.328386	0.620383	58.22	76.9867
									Chr5	10535700	10536300	-0.199171	0.621585	109.603	78.39
									Chr3	15080400	15081000	0.0140777	0.62174	222.377	223.437
									Chr1	13879500	13881600	0.231425	0.622158	292.457	200.853
									Chr5	21803100	21803400	0.224173	0.62271	29.66	40.765
									Chr5	10422000	10422300	0.104215	0.62322	72.13	76.7233
									Chr4	2343000	2343600	0.323498	0.623298	66.77	71.43
									Chr3	17272800	17273100	-0.348402	0.623983	75.6267	58.2133
									Chr4	9216600	9217500	0.402216	0.624117	50.0117	66.255
									Chr2	4328400	4330200	-0.16169	0.624379	761.41	680.963
									Chr2	8822100	8822400	-0.386356	0.624706	49.62	35.8233
									Chr1	12861900	12862200	0.271425	0.625327	113.987	139.257
									Chr1	12555300	12556200	-0.0100447	0.625389	164.51	137.55
									Chr2	2638500	2638800	0.15909	0.626077	69.8417	96.255
									Chr5	13067400	13068300	-0.236576	0.626514	219.36	161.47
									Chr2	1341900	1343100	0.256134	0.626566	229.563	302.175
									Chr3	16241700	16242000	-0.248249	0.62732	216.793	234.165
									Chr5	10842000	10844100	0.0336575	0.627931	418.658	401.607
									Chr5	15437100	15437400	0.347737	0.628319	50.78	67.9667
									Chr2	6204900	6205200	0.344832	0.629123	53.275	70.415
									Chr1	15056700	15057300	0.354196	0.630327	60.6367	78.9167
									Chr1	4992900	4993200	-0.132048	0.630409	67.4833	54.5667
									Chr3	15089400	15089700	0.0126977	0.630756	94.1267	101.87
									Chr1	13986600	13986900	-0.316921	0.630919	80.8433	72.5467
									Chr3	21968700	21969000	0.306235	0.631036	99.5067	122.535
									Chr1	12688800	12689100	0.416324	0.63114	13.89	27.1467
									Chr2	2282400	2282700	0.366465	0.631576	60.8033	72.3267
									Chr3	13293600	13293900	0.299754	0.631785	134.05	169.45
									Chr1	16546800	16547100	0.273445	0.631943	78.9133	106.637
									Chr3	10262700	10263000	0.247358	0.631968	209.508	247.81
									Chr1	15629700	15630000	-0.304204	0.63257	63.4683	47.3167
									Chr5	15702000	15702600	0.365946	0.632809	24.3933	36.48
									Chr3	15676200	15676500	0.34219	0.633429	64.3967	85.8633
									Chr2	5321100	5322000	0.332144	0.634087	61.17	82.2467
									Chr2	5588700	5589600	-0.270438	0.634353	1174.07	624.227
									Chr4	10050300	10050600	-0.367969	0.634429	57.3317	43.2333
									Chr3	15746100	15746400	0.138512	0.635257	48.4133	50.43
									Chr3	6717300	6717600	0.229499	0.63597	259.275	297.853
									Chr3	14298000	14298300	-0.161916	0.636696	774.72	679.22
									Chr5	13622700	13623000	0.338749	0.636888	129.693	154.355
									Chr2	4102500	4102800	0.205897	0.636974	147.453	177.707
									Chr5	10831800	10833900	-0.001608	0.637152	90.3683	82.3467
									Chr1	13877400	13878600	0.0082023	0.637673	239.99	231.342
									Chr4	6288000	6288600	0.278507	0.637709	153.877	223.863
									Chr5	10903800	10905600	0.287584	0.637747	128.507	148.15
									Chr1	12929100	12929400	0.065938	0.637835	265.758	274.487
									Chr2	7440000	7440300	-0.296206	0.638029	79.6733	61.91
									Chr5	14183100	14183400	-0.309009	0.63819	190.022	152.028
									Chr1	16860900	16861800	0.154822	0.638521	41.85	57.9533
									Chr5	13685700	13687200	0.203598	0.638919	603.617	659.795
									Chr5	13690500	13691100	0.125406	0.639459	409.243	481.24
									Chr5	9141300	9141600	-0.436212	0.63962	14.2317	9.84833
									Chr2	3168000	3168300	0.502302	0.64051	42.8633	57.6733
									Chr3	11469300	11469600	0.408025	0.640648	28.7617	40.61
									Chr5	10290600	10290900	0.204069	0.641143	120.077	227.23
									Chr4	2297100	2297400	0.177177	0.641257	67.9583	75.1733
									Chr3	14308200	14308500	-0.300358	0.642658	116.247	91.7433
									Chr2	2689500	2690400	0.436306	0.643026	32.71	46.7033
									Chr3	11767500	11767800	0.001303	0.643168	115.062	116.89
									Chr1	13894800	13895700	-0.525469	0.643295	19.38	7.83333
									Chr2	4373400	4374000	-0.226545	0.644382	676.313	520.237
									Chr4	4850100	4850700	0.163885	0.6455	42.7033	48.4467
									Chr3	15610800	15615300	-0.194565	0.645926	449.65	406.73
									Chr3	15083400	15084600	-0.196418	0.646079	523.668	451.428
									Chr5	12095100	12095400	0.222973	0.646655	140.052	171.323
									Chr1	13998300	13998600	0.188964	0.646667	61.4417	70.0883
									Chr3	12771900	12772500	-0.34372	0.647667	119.923	91.2367
									Chr3	11946600	11946900	0.383929	0.648618	40.3	56.5533
									Chr5	9753000	9753600	0.163542	0.649301	2737.13	3073.43
									Chr3	14973300	14973600	0.298123	0.649643	52.5633	66.4333
									Chr1	13976700	13977300	0.23992	0.649735	71.0033	105.127
									Chr3	12834900	12835200	0.310893	0.650489	51.86	67.105
									Chr5	13101300	13101600	0.355011	0.650984	52.9967	71.7133
									Chr2	10128900	10129200	-0.47611	0.651135	23.7783	14.52
									Chr1	13309800	13310700	-0.154373	0.651397	268.467	282.292
									Chr3	4118400	4118700	0.457704	0.651611	15.4133	24.0267
									Chr2	5083800	5084100	-0.271243	0.651886	40.9033	37.5
									Chr1	16347600	16348200	-0.204131	0.652137	265.4	193.577
									Chr1	13417500	13418400	0.387223	0.652655	29.38	42.32
									Chr5	10671300	10672500	-0.319043	0.652887	71.345	66.68
									Chr2	2474700	2475000	0.271065	0.65289	86.8067	111.647
									Chr1	11861100	11861400	0.38701	0.653057	27.4883	38.8667
									Chr4	3521700	3522300	0.334528	0.653685	60.4033	80.5467
									Chr3	15732000	15732900	0.16666	0.653775	409.902	429.318
									Chr1	13237800	13239300	0.202084	0.655172	378.613	408.227
									Chr2	10354200	10354500	0.372547	0.655376	27.63	39.6733
									Chr4	8901600	8901900	0.0786848	0.657576	47.17	51.4467
									Chr3	12138000	12138600	-0.45228	0.657729	28.05	16.9067
									Chr4	6748500	6748800	0.321568	0.658096	29.3583	42.2567
									Chr5	16806000	16806300	0.295601	0.658356	71.7033	94.7433
									Chr5	10173000	10173300	-0.439044	0.658363	64.1667	52.07
									Chr1	13481700	13482000	-0.30143	0.658435	62.53	48.6567
									Chr2	4322100	4322400	0.021784	0.658808	179.437	198.76
									Chr3	14950200	14951100	0.206877	0.658975	421.373	487.795
									Chr3	11643900	11644200	0.251388	0.65937	71.87	89.6067
									Chr1	17547900	17548200	0.317148	0.659629	53.9133	72.0233
									Chr3	15507300	15507600	-0.185969	0.659681	44.11	35.8133
									Chr2	3932700	3935100	0.206261	0.659863	443.115	522.058
									Chr3	12063600	12064500	-0.282979	0.660431	31.815	33.83
									Chr5	10834200	10834800	0.0911335	0.66088	113.657	121.853
									Chr4	14310000	14310300	-0.422496	0.660952	14.0833	10.73
									Chr4	8263200	8263800	0.194391	0.66111	683.01	873.147
									Chr5	14600700	14601600	0.139507	0.661605	35.7967	56.4733
									Chr2	2186700	2187000	0.24828	0.661688	56.4533	66.9283
									Chr1	16175100	16175400	0.339324	0.661863	41.2617	54.625
									Chr5	13680600	13681800	-0.231445	0.661976	591.105	546.217
									Chr1	17006100	17006400	0.136678	0.662018	187.057	217.677
									Chr3	15641400	15642300	0.193505	0.662701	1628.73	1985.55
									Chr3	16146600	16146900	0.328473	0.663323	40.4267	45.11
									Chr1	14154600	14156100	0.268347	0.663458	83.1133	104.527
									Chr2	4657800	4658400	0.265063	0.663458	185.777	225.507
									Chr1	13996500	13996800	0.218849	0.663938	70.065	86.4467
									Chr4	7822800	7823100	-0.506119	0.664103	9.66	5.85
									Chr3	11308800	11309100	0.390749	0.665241	21.24	30.81
									Chr2	2541300	2542200	-0.205326	0.666326	848.567	696.01
									Chr2	2362800	2363400	0.298987	0.666582	71.6333	89.4567
									Chr5	10507200	10507500	-0.335279	0.666595	63.08	50.3033
									Chr1	16452900	16454400	-0.169615	0.66708	221.817	189.995
									Chr5	13512000	13512600	-0.362148	0.667606	71.33	48.41
									Chr5	15600000	15600300	0.044329	0.667606	40.1533	41.8167
									Chr1	16611600	16611900	-0.287878	0.667774	363.35	371.193
									Chr5	10838700	10839900	0.170841	0.668956	575.278	604.548
									Chr3	18070200	18070500	-0.241086	0.669008	231.237	192.69
									Chr1	12633000	12633300	0.271386	0.669346	48.1467	59.9967
									Chr3	15945900	15946200	-0.320582	0.669547	99.585	76.8067
									Chr1	16251300	16252800	0.106589	0.669716	769.488	791.43
									Chr3	11783100	11783400	-0.260267	0.669921	150.777	125.588
									Chr1	12469800	12471600	0.265417	0.67022	74.8767	97.93
									Chr2	7110000	7110300	-0.4694	0.67029	19.3633	11.955
									Chr4	7313100	7313400	-0.23811	0.670567	48.4717	44.6283
									Chr5	12698100	12698400	-0.264602	0.670679	136.843	114.89
									Chr3	16005000	16005600	0.193396	0.671089	22.9267	27.3933
									Chr3	15570900	15571200	0.262907	0.671153	121.583	147.228
									Chr2	5542200	5542500	0.26849	0.671425	119.763	144.383
									Chr4	12750900	12751200	0.296996	0.671524	88.61	109.71
									Chr4	3768900	3769200	-0.163072	0.671848	2322.34	2085.78
									Chr3	14927400	14927700	-0.156787	0.672944	103.333	85.1833
									Chr5	13383900	13384200	0.25452	0.672993	124.402	150.643
									Chr2	5294700	5295000	0.367627	0.673126	34.3633	46.635
									Chr2	11053200	11053800	0.377371	0.673207	35.3433	48.08
									Chr2	741900	742200	-0.231344	0.673807	71.7233	59.835
									Chr3	11507700	11508000	0.257858	0.674149	122.902	151.032
									Chr2	6524100	6524400	0.275978	0.674643	109.597	136.375
									Chr2	2461200	2461500	-0.314926	0.675299	98.6167	92.19
									Chr2	2519700	2520600	-0.343238	0.675763	209.487	212.813
									Chr1	11369400	11369700	0.377117	0.675966	30.1767	41.64
									Chr3	11613900	11614800	0.248803	0.676018	212.007	232.743
									Chr1	16254000	16254600	-0.279324	0.67621	64.2667	51.8233
									Chr4	4293300	4293600	-0.111551	0.676264	116.708	107.64
									Chr2	2236500	2236800	0.135138	0.67675	78.8267	87.9733
									Chr1	13857600	13860300	-0.147604	0.676773	606.173	585.677
									Chr5	14681100	14681400	0.111332	0.677107	79.2817	100.442
									Chr3	12816900	12818100	-0.113795	0.677191	44.1067	37.22
									Chr2	931500	932100	0.294448	0.677473	102.737	129.583
									Chr5	17871000	17871300	0.432569	0.677581	12.4983	18.4767
									Chr2	9169500	9170100	0.363229	0.677662	33.8367	45.605
									Chr2	5717400	5720100	0.154847	0.67821	627.35	820.66
									Chr2	10687200	10687500	0.351744	0.678687	82.1867	141.98
									Chr1	11180400	11180700	0.439592	0.678782	17.0567	25.2733
									Chr3	12881100	12881400	-0.266892	0.679185	133.29	109.635
									Chr4	2338500	2338800	-0.020613	0.679243	63.5	67.485
									Chr2	2020800	2021100	0.319029	0.679927	66.5567	86.63
									Chr2	2991000	2991300	0.368992	0.680026	27.3567	46.2367
									Chr1	13852500	13852800	-0.235248	0.680081	119.873	94.85
									Chr3	13217700	13218600	0.356677	0.680335	38.8833	72.3767
									Chr1	13055400	13055700	0.19466	0.680515	45.73	52.9067
									Chr5	10121100	10121400	0.055798	0.680587	134.932	128.928
									Chr4	5142000	5142300	0.171288	0.680838	71.3867	80.1433
									Chr2	4541100	4541400	0.070514	0.680863	112.318	122.448
									Chr5	10237200	10237800	-0.242452	0.681058	286.04	217.783
									Chr1	15631800	15632100	-0.127497	0.681215	310.29	280.743
									Chr5	13515600	13515900	0.268529	0.6814	94.02	133.307
									Chr2	4788900	4789200	-0.244537	0.681449	206.932	173.168
									Chr5	10686300	10686600	-0.172317	0.682682	193.428	169.043
									Chr4	2073300	2074200	0.0392173	0.683634	4835.85	5739.09
									Chr2	1312500	1312800	0.316007	0.684205	71.415	91.225
									Chr5	10918800	10919100	-0.302557	0.68975	105.01	84.7433
									Chr1	16362900	16364700	-0.0935936	0.690031	640	645.193
									Chr4	2410500	2410800	0.272321	0.690164	145.07	159.16
									Chr3	13482000	13482300	-0.357113	0.690299	51.61	38.2733
									Chr1	13521300	13521600	-0.441061	0.690318	21.9883	14.2967
									Chr4	5167800	5168100	0.229415	0.690384	128.777	159.493
									Chr3	11613300	11613600	0.243747	0.690793	85.1667	106.218
									Chr2	2218200	2218500	0.185217	0.690866	592.977	727.72
									Chr4	1973700	1974300	0.367234	0.690866	33.2733	46.2867
									Chr5	10166700	10167000	0.351114	0.692049	31.4233	41.63
									Chr3	10962300	10962600	0.245617	0.69209	14.0783	20.7683
									Chr2	13024500	13024800	-0.355583	0.692755	62.625	49.6933
									Chr5	10907100	10907700	0.252864	0.692802	117.813	131.08
									Chr4	1287900	1291800	-0.133394	0.694052	545.085	477.127
									Chr1	13745100	13745700	-0.00208542	0.694244	135.883	163.777
									Chr1	13966500	13966800	0.269446	0.694862	44.5117	55.4733
									Chr2	4087500	4087800	0.197436	0.694909	255.348	294.508
									Chr1	14309700	14310000	-0.283143	0.695443	76.0217	63.66
									Chr5	14870100	14870400	0.319837	0.696153	47.9267	61.9667
									Chr1	13343400	13343700	0.277439	0.696479	35.1567	46.87
									Chr5	16587600	16587900	0.340502	0.696497	38.5733	50.0233
									Chr2	1346700	1347000	-0.261203	0.697531	125.697	101.683
									Chr4	4079400	4081200	-0.108283	0.697581	35.5233	36.1833
									Chr5	15728400	15728700	0.312002	0.698164	51.2517	65.8
									Chr1	13752300	13752600	0.101854	0.698384	62.4533	68.985
									Chr5	12447900	12448200	0.294378	0.699117	70.2267	88.585
									Chr2	6373800	6374700	-0.400097	0.699604	67.6117	51.4883
									Chr2	11400000	11400900	0.224544	0.69991	82.8	95.2533
									Chr4	8767800	8768100	0.400346	0.700252	15.5617	23.5067
									Chr4	3763800	3764100	0.302126	0.700786	52.9867	62.1367
									Chr5	10689000	10689300	0.0865571	0.700846	50.5467	53.9933
									Chr3	12317400	12317700	0.203331	0.701004	220.207	254.82
									Chr4	1890300	1890600	0.352859	0.701012	38.5333	50.7367
									Chr2	5177700	5178000	0.33978	0.701207	34.7117	46.6167
									Chr2	5664300	5664600	-0.2167	0.701377	32.6583	28.9817
									Chr3	16457700	16458000	0.342332	0.701604	47.125	59.77
									Chr1	12576900	12577200	-0.232857	0.701827	151.697	127.44
									Chr5	10914900	10915200	-0.138595	0.7023	91.3633	80.99
									Chr4	3805200	3805500	-0.397125	0.702526	35.8633	24.8933
									Chr5	14990400	14990700	0.395327	0.702796	21.1667	30.08
									Chr2	4749000	4749300	-0.38656	0.703611	33.0867	21.8733
									Chr5	13581000	13581300	0.271863	0.703902	46.79	69.3167
									Chr5	9368700	9369000	0.183556	0.704465	45.575	61.62
									Chr5	12652500	12652800	-0.0747545	0.704499	29.0317	33.7817
									Chr4	865500	865800	-0.196886	0.704757	119.493	99.4683
									Chr3	14888100	14888400	-0.238178	0.705071	58.1133	50.5683
									Chr2	6228300	6228600	-0.252673	0.705079	77.515	62.0317
									Chr1	11536500	11536800	-0.409721	0.705216	25.8233	17.4217
									Chr1	15993900	15995400	0.155758	0.705848	80.8567	93.0933
									Chr2	2471700	2473200	0.277195	0.706149	84.0817	90.7833
									Chr3	12270000	12271200	0.00429208	0.706442	377.012	397.252
									Chr3	14761800	14762700	0.176123	0.707067	200.882	216.257
									Chr5	13682100	13683300	0.13382	0.707077	405.678	670.833
									Chr5	14156100	14156400	-0.215843	0.707156	861.08	729.735
									Chr2	3584400	3585300	-0.266151	0.707346	95.5483	84.4833
									Chr1	15058200	15058500	0.306368	0.707463	60.4	73.8967
									Chr5	9756900	9757500	0.195287	0.707463	393.333	482.717
									Chr1	15001800	15002100	-0.366928	0.708188	48.43	30.2133
									Chr1	13748400	13749600	-0.22448	0.708291	72.8533	87.9967
									Chr2	2537100	2537400	-0.124871	0.708797	406.847	402.37
									Chr1	8682000	8682300	0.243692	0.709138	160.448	193.698
									Chr5	13074900	13075200	0.155189	0.709471	73.0917	86.86
									Chr5	15813600	15813900	0.365195	0.709634	191.843	238.973
									Chr2	6964800	6965100	0.33927	0.709677	40.5667	58.1267
									Chr4	4093800	4094100	-0.376172	0.709833	37.98	26.9733
									Chr2	6780300	6780600	-0.424221	0.710497	13.69	8.21667
									Chr3	17682300	17682600	-0.108078	0.710551	76.3783	64.5417
									Chr3	12459000	12459300	0.235785	0.71073	243.417	269.92
									Chr1	11611500	11611800	0.25523	0.711233	14.6967	22.12
									Chr4	5620800	5621100	0.35449	0.711429	30.3133	40.6433
									Chr2	6985800	6986100	0.224928	0.711819	39.2167	46.5433
									Chr3	11079900	11080200	-0.108757	0.711831	43.8617	50.79
									Chr2	2312100	2312400	-0.184817	0.712061	25.4467	19.165
									Chr2	5002500	5002800	-0.343566	0.712241	43.19	32.4867
									Chr2	6375300	6376200	-0.460483	0.712321	39.8133	26.5367
									Chr2	6514500	6516300	-0.0565891	0.712575	178.973	200.91
									Chr1	13590300	13590900	0.460425	0.712803	9.58333	16.1867
									Chr3	13260000	13260300	-0.182037	0.712803	24.1233	35.4467
									Chr1	13854300	13857000	-0.218758	0.712902	407.777	308.728
									Chr2	5720400	5723400	-0.250639	0.713326	272.413	282.91
									Chr2	6004800	6005400	-0.00462376	0.71413	457.427	454.37
									Chr2	12410700	12411000	-0.357354	0.714199	38.195	27.935
									Chr5	14594400	14594700	-0.337388	0.714548	49.96	37.7867
									Chr2	11508600	11508900	-0.201263	0.714791	22.1833	14.9433
									Chr1	15987300	15987600	-0.252088	0.715156	111.78	97.2217
									Chr1	13436700	13437000	-0.171025	0.715425	286.562	253.363
									Chr4	3802800	3804900	0.268645	0.715689	117.027	144.265
									Chr3	12635700	12636000	-0.258059	0.715782	123.168	102.14
									Chr5	12084600	12084900	0.256926	0.715958	56.1733	72.5367
									Chr1	13756500	13756800	0.342683	0.715963	41.14	54.5167
									Chr2	6379200	6379800	-0.219535	0.715989	169.88	120.443
									Chr1	12734400	12735000	-0.200742	0.716454	100.35	78.8533
									Chr3	22173600	22173900	-0.333884	0.716551	30.5933	23.5533
									Chr4	6349800	6350100	-0.34337	0.716958	28.3067	26.4233
									Chr2	5011500	5011800	-0.24121	0.71785	168.11	140.153
									Chr2	6491100	6491400	0.300087	0.718279	65.6933	81.2717
									Chr4	7213800	7214400	0.326254	0.719017	26.5433	35.4667
									Chr2	4764900	4765200	-0.138714	0.719048	162.603	154.887
									Chr1	10421100	10421400	-0.303298	0.719762	128.267	108.778
									Chr5	6302100	6302400	-0.375264	0.720105	100.67	85.26
									Chr3	11895600	11896200	-0.257019	0.72123	195.647	183.4
									Chr2	4808700	4809000	-0.029658	0.721693	224.112	206.517
									Chr1	16612200	16613400	-0.249993	0.722109	426.007	356.975
									Chr2	5435400	5435700	-0.0331692	0.722208	505.557	493.577
									Chr4	2263200	2264700	0.227289	0.722376	236.447	286.26
									Chr2	2745300	2745600	0.182631	0.723744	33.735	39.8783
									Chr2	2986200	2987400	0.180569	0.724123	111.913	117.022
									Chr5	21942600	21942900	-0.0354945	0.724302	62.915	51.6933
									Chr1	16548000	16548300	0.300081	0.724317	35.16	41.4567
									Chr5	9084300	9084900	0.235506	0.72489	53.6033	54.41
									Chr4	3523500	3523800	-0.189106	0.725204	227.365	195.402
									Chr1	12509400	12509700	0.229459	0.725473	98.9133	128.61
									Chr2	2987700	2988600	0.219127	0.726145	88.83	113.927
									Chr3	12602100	12602400	0.173454	0.726496	36.3567	44.52
									Chr5	15887700	15888000	-0.245292	0.727544	111.442	91.795
									Chr1	11686200	11686500	0.381127	0.72866	21.3933	26.7733
									Chr5	14820600	14820900	-0.353169	0.72889	70.6333	53.1333
									Chr5	17041500	17041800	0.169623	0.728973	158.65	193.398
									Chr3	11890800	11891700	0.128041	0.729247	852.995	865.522
									Chr2	1313700	1314000	0.236764	0.729912	79.6667	93.8467
									Chr2	4296300	4297800	0.0812748	0.730159	143.56	182.413
									Chr2	2912100	2912400	0.373345	0.730765	23.5483	32.3683
									Chr4	5929500	5929800	-0.288703	0.732109	71.7717	57.3883
									Chr1	16593900	16595400	0.0647626	0.732315	583.865	639.855
									Chr2	5404800	5406600	-0.0403391	0.732621	218.66	246.747
									Chr2	5426400	5426700	0.227453	0.732742	190.593	227.677
									Chr2	6544200	6544500	-0.256384	0.732931	79.8833	63.94
									Chr1	13656300	13656600	0.291831	0.733395	64.47	79.4283
									Chr2	1305600	1306200	0.299388	0.733578	58.45	82.2
									Chr3	12622200	12622500	0.306613	0.734042	48.1433	60.84
									Chr5	11491200	11491500	0.264823	0.734042	35.6533	44.26
									Chr3	15954300	15954900	0.226195	0.734922	347.31	376.433
									Chr1	13988400	13988700	-0.301206	0.73524	54.5067	37.64
									Chr5	7971600	7971900	0.267188	0.735593	71.8967	88.9933
									Chr5	26161500	26161800	0.282529	0.735939	24.855	34.4183
									Chr5	13630200	13631400	-0.319039	0.73626	73.945	53.31
									Chr3	10809000	10809300	-0.384449	0.736297	23.96	15.47
									Chr2	5402100	5404500	0.205789	0.736537	79.49	112.383
									Chr5	15000300	15000600	0.433721	0.73762	7.75333	12.6367
									Chr2	6497400	6500100	0.0655679	0.738206	726.81	818.437
									Chr4	4077900	4078200	-0.0227255	0.738405	26.7417	29.9067
									Chr4	4449300	4449600	-0.300863	0.738491	56.1017	44.0833
									Chr5	19024800	19025100	0.353337	0.738687	34.09	45.0167
									Chr3	11643300	11643600	-0.280775	0.739345	36.7467	28.0467
									Chr4	2072400	2072700	-0.244622	0.739708	169.99	138.133
									Chr1	16068000	16068300	-0.441928	0.739735	25.44	12.24
									Chr3	12267900	12269100	0.0945716	0.740104	572.727	671.735
									Chr3	12970800	12971100	0.125492	0.740777	99.1833	109.867
									Chr1	14002800	14003100	-0.444133	0.740807	77.8667	54.1033
									Chr1	17579100	17579700	0.265135	0.740835	35.0433	48.2767
									Chr1	13910700	13911000	-0.0522326	0.740913	1079.02	980.19
									Chr4	8796900	8797200	0.174955	0.741204	35.41	43.4167
									Chr5	14656200	14656800	0.28103	0.741902	97.84	100.463
									Chr2	6155400	6155700	-0.315592	0.741921	58.07	48.1167
									Chr2	8893800	8894400	-0.16974	0.742212	26.24	22.1633
									Chr5	11028900	11029200	-0.0652825	0.742254	102.59	93.0283
									Chr1	13882200	13882500	0.268245	0.7429	73.97	96.7667
									Chr2	4034100	4034400	-0.222342	0.743271	92.5567	88.1267
									Chr2	291300	291600	0.068989	0.743301	16.575	20.7217
									Chr1	15969900	15970200	0.268506	0.743575	63.34	78.39
									Chr2	4323900	4326300	0.0596526	0.743681	603.748	620.08
									Chr1	16499100	16499400	0.178358	0.743989	877.762	982.115
									Chr2	5584800	5586300	-0.237364	0.744039	68.7967	53.83
									Chr2	4768500	4769100	0.151252	0.744224	692.333	785.727
									Chr1	12578700	12579000	0.198805	0.74436	127	149.737
									Chr5	10837200	10837500	-0.257435	0.744453	256.137	222.547
									Chr2	2517300	2517600	-0.231685	0.74446	108.565	89.8833
									Chr1	13743300	13743600	-0.253408	0.744975	123.832	100.385
									Chr4	2685900	2686200	-0.378107	0.745151	30.47	22.26
									Chr2	3566400	3566700	-0.258905	0.745906	99.34	80.0367
									Chr1	16350000	16353600	-0.118162	0.746031	1577.18	1513.8
									Chr4	2079300	2079600	-0.0894052	0.746101	1173.51	1134.29
									Chr2	3531000	3531300	-0.245475	0.746181	163.853	123.413
									Chr1	13747500	13747800	-0.234731	0.746305	156.68	133.502
									Chr3	12452700	12453300	0.0853586	0.74634	79.54	103.22
									Chr2	3903900	3904500	-0.378817	0.746544	27.8267	20.14
									Chr3	20929800	20930100	-0.353509	0.746795	18.6583	13.425
									Chr1	12513900	12514200	0.238062	0.747435	104.517	125.047
									Chr2	4544400	4544700	-0.221618	0.747732	97.37	97.35
									Chr5	13495200	13495800	-0.297233	0.747887	82.5067	68.2767
									Chr5	10899900	10902300	0.0161426	0.748154	174.9	158.443
									Chr2	4330500	4331400	-0.171215	0.748164	584.067	649.763
									Chr5	12534600	12534900	-0.334742	0.748249	38.1	29.21
									Chr5	11548500	11548800	0.274873	0.748517	54.1833	67.015
									Chr1	8622300	8622600	0.18473	0.748526	31.4183	35.5817
									Chr5	9156000	9156300	-0.193931	0.74853	74.5167	54.91
									Chr2	2538000	2538300	-0.167467	0.748898	847.173	813.54
									Chr1	16177200	16177500	0.223408	0.749283	197.857	222.387
									Chr5	15951600	15952200	0.215333	0.750175	113.975	142.993
									Chr5	21143100	21143400	0.390564	0.750565	13.845	20.3583
									Chr4	5470800	5471100	-0.270593	0.750665	77.14	62.2067
									Chr1	17305800	17306100	0.301618	0.75069	77.33	110.193
									Chr3	11457000	11458200	0.235829	0.750784	174.423	196.547
									Chr4	1650900	1651200	0.19082	0.750962	71.4517	83.4733
									Chr4	6340200	6340500	-0.213254	0.751282	85.3867	61.6967
									Chr1	16356600	16359600	0.0876076	0.7516	1197.66	1483.92
									Chr1	13731900	13732200	-0.0620375	0.751694	208.445	205.245
									Chr5	14909400	14909700	-0.333657	0.751905	51.3733	47.87
									Chr2	1767600	1768200	-0.272935	0.751968	88.07	62.2833
									Chr2	7347900	7348200	0.250889	0.753621	75.8467	92.255
									Chr5	20649600	20649900	-0.102566	0.753877	17.2717	17.5633
									Chr3	17321400	17321700	-0.256544	0.754063	130.387	106.427
									Chr3	15634200	15634500	-0.171026	0.754363	2774.08	2450.33
									Chr2	2520900	2522100	-0.201452	0.754491	1967.33	1734.33
									Chr1	14039100	14039400	-0.328031	0.754817	36.6667	28.25
									Chr4	9317700	9318000	-0.129589	0.754927	71.2117	65.3483
									Chr4	5504400	5504700	-0.0337322	0.754998	33.05	32.4567
									Chr5	10212900	10213200	0.262539	0.755516	36.07	45.7117
									Chr2	3778800	3779100	0.333672	0.755644	78.6367	88.3433
									Chr5	19832100	19832400	0.228867	0.755794	79.505	102.482
									Chr3	11430900	11431200	0.199044	0.756452	136.52	159.46
									Chr2	5588100	5588400	-0.35285	0.756634	42.4733	33.95
									Chr1	6777900	6778200	-0.408249	0.757115	11	6.03
									Chr2	2579400	2579700	0.108158	0.757613	40.27	41.0667
									Chr5	11064000	11064300	0.239392	0.757784	64.2467	61.2033
									Chr4	2317800	2318100	-0.258356	0.758502	86.0767	69.82
									Chr1	13728300	13731000	-0.148376	0.758812	134.865	118.565
									Chr5	6313800	6314100	0.206659	0.759554	8.93	8.49667
									Chr2	6471600	6471900	0.304918	0.75975	49.23	62.65
									Chr1	13087200	13087500	0.0545474	0.760056	562.173	584.867
									Chr1	16606500	16607700	0.0275499	0.760075	295.252	338.33
									Chr2	2889600	2889900	0.285867	0.760513	14.4467	19.74
									Chr2	3675000	3675300	0.323023	0.760538	27.52	40.7933
									Chr3	12637200	12637800	-0.164606	0.760737	131.78	119.867
									Chr1	12009300	12009600	0.270636	0.760876	64.6267	78.6767
									Chr2	1917000	1917300	0.255397	0.76089	64.5367	79.8333
									Chr4	1854600	1855200	0.332338	0.760898	27.6267	36.98
									Chr1	7724700	7725000	-0.12435	0.761644	39.835	39.0667
									Chr3	15347100	15347700	-0.36766	0.761653	26.2	18.5567
									Chr2	1092900	1093200	0.186176	0.761822	71.3167	80.5483
									Chr2	1344900	1345200	-0.268666	0.762149	87.0083	71.1
									Chr5	13695000	13695900	-0.139454	0.762362	133.88	126.91
									Chr4	2844900	2845200	0.240722	0.762797	79.33	95.5033
									Chr5	10527900	10528800	0.0340075	0.76292	182.083	147.103
									Chr1	13307700	13308000	-0.0112295	0.763061	534.817	508.988
									Chr1	12498900	12499500	-0.144634	0.763392	60.62	54.1633
									Chr4	2087100	2087400	0.168402	0.763861	149.223	171.685
									Chr2	1348200	1348800	0.319663	0.764016	29.47	38.22
									Chr5	18387300	18387600	-0.312593	0.764332	21.065	16.0183
									Chr3	14747100	14748000	-0.215094	0.764499	106.567	83.6467
									Chr3	7566600	7567200	0.374181	0.764655	38.2833	56.7833
									Chr1	16245300	16246800	0.11285	0.764686	1190.03	1221.09
									Chr2	9556800	9557100	-0.0424175	0.764735	52.2833	56.0033
									Chr3	15349800	15350100	0.234178	0.764901	72.89	102.5
									Chr2	4079700	4080000	0.0976148	0.765714	152.262	178.308
									Chr2	5054700	5055300	-0.324057	0.766105	46.17	37.7933
									Chr2	2281800	2282100	0.271123	0.766401	65.4733	81.2033
									Chr3	845400	845700	-0.37197	0.766517	22.82	16.4067
									Chr5	9758100	9759600	0.110389	0.766777	332.662	315.132
									Chr1	15000600	15001500	0.255202	0.767332	54.3317	75.79
									Chr1	13043400	13043700	0.246678	0.767653	73.45	87.9033
									Chr5	15327300	15327600	-0.358427	0.767748	21.2733	15.4467
									Chr5	10182600	10183200	0.230298	0.768175	91.6733	109.147
									Chr3	15170400	15170700	-0.232199	0.76827	101.923	85.56
									Chr4	2822100	2823000	0.188041	0.768275	206.227	263.43
									Chr3	11769900	11770200	0.244811	0.768277	63.035	76.735
									Chr2	5434500	5435100	0.132182	0.768825	252.01	311.327
									Chr2	2536200	2536800	-0.202963	0.769241	549.947	462.467
									Chr5	14157000	14157300	0.158461	0.769808	711.273	794.92
									Chr5	13560900	13561800	-0.201341	0.770017	404.743	318.863
									Chr1	16998900	16999200	-0.0276265	0.770065	17.205	17.5517
									Chr3	16067100	16067400	-0.09392	0.771111	121.882	98.2883
									Chr2	5401200	5401500	0.152121	0.77159	459.44	513.73
									Chr4	2267400	2268900	-0.047363	0.77159	205.513	151.257
									Chr5	10858800	10859100	0.361299	0.771613	14.29	17.6
									Chr5	9588600	9588900	-0.289439	0.772165	56.9567	45.17
									Chr1	4061700	4062000	0.298417	0.772332	42.1217	54.4117
									Chr3	10828200	10828500	-0.386914	0.772895	16.1433	9.73667
									Chr4	4604400	4605600	-0.280983	0.774397	70.315	51.075
									Chr3	14678700	14679000	0.115702	0.774404	421.723	464.985
									Chr2	1201800	1204500	0.236342	0.774505	46.8867	55.4233
									Chr1	13757700	13758000	-0.088432	0.77454	75.3617	72.1433
									Chr2	924900	925800	-0.306161	0.774793	24.24	12.9867
									Chr1	12899100	12902700	0.0435271	0.775011	855.48	824.923
									Chr2	9161100	9161400	-0.0376405	0.775522	61.1983	68.1667
									Chr1	16176000	16176900	0.11413	0.775568	167.377	174.775
									Chr4	2876400	2876700	0.352977	0.775593	47.06	56.38
									Chr5	14872800	14873100	-0.270797	0.776585	68.0533	54.3733
									Chr5	24944100	24944700	0.237723	0.776585	70.95	84.36
									Chr1	17686500	17686800	-0.022021	0.777019	43.5483	49.365
									Chr1	12172500	12172800	0.221632	0.777308	98.4717	115.842
									Chr1	12699000	12699300	-0.383863	0.777609	24.2667	21.9
									Chr4	3774900	3775200	0.0179395	0.777633	442.53	473.5
									Chr4	2724900	2725200	-0.0243815	0.778211	53.7517	50.8617
									Chr2	4307700	4308900	-0.288733	0.778578	52.9917	37.0217
									Chr3	13537200	13537500	0.0941849	0.778697	45.77	48.38
									Chr3	11479500	11480100	0.145383	0.779657	333.683	433.807
									Chr1	15919200	15920100	-0.112034	0.780143	46.34	46.1333
									Chr1	16010100	16010400	0.250511	0.780237	91.14	110.147
									Chr2	4261200	4261500	0.228435	0.780956	69.1633	64.9767
									Chr2	7690200	7690800	0.326444	0.780981	36.5133	49.19
									Chr3	11890200	11890500	-0.0738488	0.7814	121.03	113.787
									Chr4	5408400	5408700	0.334843	0.782093	19.02	28.16
									Chr2	2516700	2517000	0.175298	0.78259	346.885	429.828
									Chr4	1640700	1641000	0.296334	0.782751	28.2683	36.555
									Chr3	15231900	15232500	0.187147	0.782817	153.647	185.17
									Chr1	16866600	16866900	-0.297716	0.782953	45.9367	33.73
									Chr2	8538300	8538600	0.289542	0.783282	33.075	41.5933
									Chr4	1659600	1659900	0.184626	0.783549	226.083	262.697
									Chr1	16247100	16248900	0.175126	0.784244	184.577	211.663
									Chr2	4357200	4357500	-0.155224	0.784285	367.883	333.303
									Chr1	12615300	12615600	0.0475305	0.785041	24.6183	27.43
									Chr4	5181000	5181600	-0.336823	0.785159	34.56	24.935
									Chr1	13532700	13533000	-0.203185	0.785333	13.58	12.135
									Chr4	2099100	2099700	0.101492	0.785339	73.5833	79.75
									Chr3	15027000	15027300	-0.300422	0.785397	53.1167	41.2267
									Chr2	1155000	1155300	0.303491	0.785755	26.7833	36.4667
									Chr1	12511500	12513000	0.228957	0.785863	102.475	110.828
									Chr5	25048500	25048800	0.255155	0.786322	79.8417	92.9333
									Chr3	10434600	10434900	-0.250907	0.78718	75.4	61.65
									Chr5	18554100	18554400	-0.16037	0.787501	184.042	158.12
									Chr5	14288700	14289000	-0.204065	0.787749	88.1433	75.0833
									Chr3	12241800	12242700	-0.18998	0.787831	3482.54	2961.7
									Chr2	5215200	5215500	-0.34665	0.787902	69.88	40.39
									Chr1	13304700	13305000	-0.233468	0.788019	116.097	99.67
									Chr2	5948100	5948400	-0.0797711	0.788192	741.735	675.688
									Chr2	4833600	4834200	-0.355006	0.788302	88.39	65.3
									Chr5	10235700	10236900	0.0720965	0.788391	207.862	174.47
									Chr5	10653600	10656000	-0.0841447	0.788477	108.485	101.787
									Chr2	7440600	7440900	-0.177214	0.788596	213.377	186.563
									Chr2	13160400	13160700	0.213553	0.788671	63.05	69
									Chr3	16626300	16626900	0.311114	0.78946	33.23	37.7433
									Chr2	2460000	2460300	-0.283877	0.78983	29.2733	20.9
									Chr5	9644400	9645000	0.207877	0.790064	106.747	139.218
									Chr1	16255800	16257600	0.129435	0.790497	183.84	179.88
									Chr3	12809400	12810000	-0.27416	0.790507	58.7033	46.6967
									Chr5	11546700	11547000	0.0718915	0.790533	84.2983	91.3167
									Chr5	10556700	10557300	0.168221	0.79061	197.85	191.81
									Chr5	10993800	10994100	0.28473	0.790675	36.63	46.1633
									Chr4	3810900	3811200	0.100975	0.791057	236.468	261.967
									Chr5	16240200	16240500	0.0541145	0.791315	27.25	24.0933
									Chr2	5179500	5179800	0.277743	0.791327	35.725	45.0683
									Chr3	14909400	14909700	-0.194837	0.791442	181.68	149.44
									Chr5	10071300	10071600	0.140145	0.791647	40.6233	50.5917
									Chr1	13387500	13387800	0.330123	0.791905	17.2767	24.4517
									Chr1	13311000	13311300	-0.205174	0.791975	158.513	139.257
									Chr5	20519700	20520000	-0.191643	0.792033	116.028	93.5533
									Chr2	4948200	4948500	-0.132324	0.792128	112.063	101.293
									Chr3	14307000	14307900	-0.129842	0.792244	186.42	168.455
									Chr5	14819700	14820300	0.337058	0.793318	18.8533	25.6
									Chr3	15027600	15028200	0.215271	0.793861	96.3867	113.66
									Chr1	12924900	12925800	-0.27888	0.794067	37.5067	29.4767
									Chr1	12510900	12511200	0.136668	0.794257	325.563	342.245
									Chr1	17145600	17145900	0.259773	0.794465	62.6967	75.32
									Chr1	13496100	13496400	0.288226	0.794628	26.94	34.8467
									Chr3	11899200	11900100	-0.205496	0.794745	441.53	378.772
									Chr1	13465800	13466400	0.259991	0.794956	42.0667	61.7967
									Chr3	11226600	11226900	0.178604	0.795133	477.143	547.51
									Chr4	2296500	2296800	0.261788	0.795252	53.2433	63.9233
									Chr4	2266500	2266800	-0.252526	0.795765	132.82	111.352
									Chr5	22093200	22093500	0.344956	0.795842	17.7667	25.53
									Chr3	9153900	9154200	-0.015559	0.795857	55.1333	57.875
									Chr1	16719900	16720200	0.017857	0.795926	11.965	14.0367
									Chr3	8956200	8956800	0.233349	0.795954	84.69	101.44
									Chr4	2259000	2259300	-0.044805	0.795992	27.0433	28.4467
									Chr2	1466400	1466700	-0.294549	0.796489	43.0833	33.5667
									Chr1	12166800	12167100	0.0731246	0.797041	431.727	384.493
									Chr5	10567800	10568400	-0.171849	0.79729	498.023	386.19
									Chr1	16672500	16673100	0.213487	0.79736	125.91	191.467
									Chr2	1280700	1281000	-0.118142	0.797602	99.7567	101.77
									Chr3	11766300	11766600	0.182025	0.797775	268.473	304.298
									Chr2	2224800	2226300	0.0150904	0.79797	4659.37	5467.42
									Chr1	13352100	13352400	0.0055735	0.798003	19.9983	18.9867
									Chr2	8452500	8454300	-0.0794961	0.79804	66.2867	62.9367
									Chr3	13530900	13531200	0.263367	0.79827	19.8167	24.8033
									Chr3	15637800	15641100	-0.0824193	0.798396	712.008	683.21
									Chr3	11322000	11322300	0.129778	0.79876	419.15	470.527
									Chr2	1468500	1468800	-0.249929	0.799717	69.7083	57.125
									Chr3	7131900	7132500	0.280435	0.799732	37.96	52.2033
									Chr1	16349400	16349700	0.116825	0.799755	792.193	1006.72
									Chr5	15207600	15207900	0.240977	0.799755	126.447	171.42
									Chr4	5178600	5178900	-0.194773	0.799985	201.547	173.197
									Chr1	13751100	13751400	-0.203363	0.800189	56.8817	46.5233
									Chr3	15395400	15398700	-0.0536651	0.800724	644.04	624.768
									Chr4	6382500	6382800	0.003639	0.800771	17.7683	20.685
									Chr5	15326400	15326700	-0.235435	0.801121	37.03	28.9217
									Chr5	14715000	14715300	0.266448	0.801219	15.6433	20.85
									Chr3	15270900	15271200	0.096848	0.801481	492.8	524.18
									Chr3	11778600	11779800	-0.0328757	0.801496	35.0983	33.3267
									Chr2	6525600	6525900	-0.110572	0.801614	142.423	163.42
									Chr4	8598000	8598300	0.232955	0.801721	53.7533	70.0433
									Chr5	13653900	13654500	0.0117664	0.801837	22.7933	16.1067
									Chr2	3563700	3564000	0.30014	0.801928	23.6167	29.3567
									Chr5	10086300	10086600	-0.014611	0.802059	309.982	287.243
									Chr4	10648800	10649100	-0.0805024	0.802279	75.91	91.5067
									Chr3	15133500	15133800	-0.0963423	0.802556	502.652	470.312
									Chr1	13860600	13860900	-0.257315	0.803221	120.363	95.6767
									Chr5	9754800	9755100	-0.327162	0.803233	49.22	41.5067
									Chr1	17187600	17187900	-0.217902	0.803302	57.13	50.14
									Chr3	5453400	5453700	0.30753	0.803336	26.2833	35.6567
									Chr1	13353300	13353600	-0.203709	0.804926	31.1783	25.68
									Chr2	6731700	6732600	0.197837	0.805125	56.6767	68.32
									Chr4	4144800	4145100	-0.0878159	0.805125	73.9467	69.0467
									Chr2	4360200	4360500	-0.257651	0.805156	132.13	104.607
									Chr5	14553900	14554200	0.31085	0.805281	14.5683	19.4467
									Chr2	3935400	3937500	0.114505	0.805431	216.32	226.27
									Chr2	2321100	2321700	0.194907	0.806175	105.673	121.973
									Chr2	3665100	3665400	-0.30974	0.806763	32.9083	24.8567
									Chr5	13970700	13971300	-0.278571	0.806836	46.0333	36.9433
									Chr3	15317400	15317700	0.232391	0.807188	74.0367	81.1133
									Chr4	8189100	8189400	-0.34196	0.807578	14.5533	10.32
									Chr1	12866700	12867000	-0.180108	0.807593	23.8617	21.1317
									Chr2	11040900	11041200	-0.274413	0.807866	34.0667	26.4933
									Chr2	4374300	4374600	-0.193851	0.8081	160.72	138.627
									Chr4	5619300	5619600	0.184585	0.808419	55.88	66.2533
									Chr1	9630300	9630900	0.0964356	0.808655	60.9	62.6533
									Chr2	5313900	5314500	-0.329783	0.808655	33.54	23.8133
									Chr5	10570800	10572000	-0.102053	0.808699	565.847	634.563
									Chr1	16181700	16182000	0.199251	0.808882	81.5533	92.7617
									Chr3	15075600	15075900	-0.144824	0.809096	62.5667	49.13
									Chr1	13977600	13977900	0.248989	0.809201	100.757	101.753
									Chr5	9755400	9756300	0.133241	0.809214	861.39	895.9
									Chr4	2257500	2257800	0.160122	0.80937	312.393	347.355
									Chr5	14006700	14007000	-0.296948	0.810098	35.595	27.265
									Chr4	2241300	2241600	0.218287	0.810296	24.1983	33.3467
									Chr5	10557600	10559100	-0.144145	0.810347	167.117	148.783
									Chr3	12370800	12371100	0.16279	0.810466	203.367	219.233
									Chr2	2696700	2697000	0.356774	0.810685	8.10833	12.1167
									Chr2	1567200	1567500	0.229067	0.810706	12.4033	8.78
									Chr5	16736100	16736700	0.359823	0.811207	24.68	35.1667
									Chr2	6089400	6089700	-0.19789	0.811364	25.14	22.2633
									Chr1	14041800	14042100	0.107007	0.81158	98.8867	133.547
									Chr5	11387700	11388300	0.230594	0.811686	75.4567	78.03
									Chr5	14786100	14786400	0.21493	0.812099	90.985	106.087
									Chr4	5507100	5507700	0.131773	0.812913	722.483	792.697
									Chr1	11006100	11006400	0.223609	0.812955	72.755	86.8733
									Chr2	4583100	4583400	0.251197	0.813798	53.7883	64.7833
									Chr2	7072200	7072500	0.332632	0.814251	15.8367	20.8567
									Chr3	12459600	12460200	-0.0114861	0.814251	37.3867	32.8333
									Chr5	15021600	15021900	0.22739	0.814306	23.3367	14.3167
									Chr3	15338400	15338700	-0.0893082	0.814846	70.9233	66.0333
									Chr3	17099100	17099400	0.304476	0.815407	20.045	26.41
									Chr3	15603900	15604200	0.26396	0.815469	28.455	35.11
									Chr2	3174300	3174600	-0.208286	0.815654	106.855	93.6983
									Chr4	9801600	9802200	-0.16002	0.81582	41.1933	35.0267
									Chr2	4269900	4270500	0.167	0.816089	216.76	246.26
									Chr5	12695400	12696000	-0.132853	0.81622	78.9933	66.3833
									Chr2	4737600	4737900	-0.0636025	0.816323	160.903	145.753
									Chr2	4997100	4997400	-0.194356	0.816805	197.585	176.982
									Chr2	5436900	5437500	0.141694	0.818071	464.68	419.567
									Chr1	13473600	13473900	-0.0180095	0.818162	31.7467	33.2167
									Chr3	12779400	12779700	-0.156165	0.818713	348.447	309.543
									Chr2	5323200	5324400	-0.201413	0.818907	37.5867	29.8933
									Chr3	14238600	14238900	-0.276032	0.819389	42.5667	34.4433
									Chr3	11185200	11187900	0.0264463	0.819518	313.167	318.827
									Chr5	9178500	9178800	-0.232367	0.819755	69.08	57.9133
									Chr2	3925800	3928500	0.203428	0.81984	66.0933	72.6767
									Chr2	564300	564600	-0.0632965	0.819846	30.4067	32.3667
									Chr1	13520700	13521000	0.0297725	0.820129	63.5867	67.935
									Chr5	15812700	15813000	-0.193543	0.820148	212.002	204.625
									Chr3	10394100	10394400	-0.102713	0.820195	108.72	107.63
									Chr1	16346700	16347300	0.162487	0.820428	246.917	274.393
									Chr3	11485200	11485500	-0.183506	0.82054	141.163	134.94
									Chr4	1486500	1487400	0.185116	0.82096	54.68	52.42
									Chr5	12094500	12094800	-0.23551	0.821527	17.065	13.9167
									Chr5	17201100	17201400	0.153673	0.821739	46.4083	43.8933
									Chr3	11898600	11898900	-0.287168	0.822098	52.84	36.2367
									Chr3	16171500	16171800	-0.349272	0.822156	15.7	10.74
									Chr4	1602300	1603200	-0.0582466	0.822395	98.3133	123.21
									Chr2	6826500	6826800	-0.201894	0.82289	99.26	84.5417
									Chr1	16337400	16337700	0.17924	0.822929	40.6267	43.0033
									Chr4	1878300	1878600	0.072417	0.823108	65.6633	69.9683
									Chr1	16167900	16170600	-0.0439687	0.823542	137.422	171.025
									Chr5	13974600	13974900	-0.162664	0.823653	268.283	214.4
									Chr4	1371900	1372200	-0.263612	0.824218	44.69	36.4483
									Chr2	8016000	8016600	0.195698	0.824426	100.123	117.01
									Chr1	16701300	16701600	0.219676	0.824463	68.8833	82.4383
									Chr3	15642600	15642900	-0.134261	0.82473	128.61	148.3
									Chr2	5316300	5318100	0.193121	0.82476	314.943	329.553
									Chr2	5734800	5735100	0.00463748	0.824889	61.69	49.56
									Chr2	5504400	5504700	0.273717	0.824957	24.2767	36.4033
									Chr3	15619200	15619800	-0.152492	0.825125	609.04	543.227
									Chr2	287400	287700	-0.146195	0.825313	56.41	43.7067
									Chr3	16377600	16377900	0.250768	0.825313	31.1867	32.19
									Chr3	15221100	15222000	-0.205754	0.82557	83.9833	82.22
									Chr2	10643100	10643400	-0.21987	0.825669	68.68	58.1167
									Chr5	13063500	13063800	0.218805	0.825821	129.435	150.43
									Chr2	678000	679200	0.1459	0.826015	16.7367	17.8033
									Chr5	17274300	17274600	-0.222777	0.826209	34.2083	30.35
									Chr5	13609500	13609800	-0.19749	0.82628	38.5967	33.2467
									Chr3	16258800	16259400	0.266352	0.82648	31.7567	38.7567
									Chr3	9906000	9906300	0.340517	0.826491	5.86667	6.88333
									Chr4	4849200	4849500	0.172497	0.826786	152.79	163.89
									Chr5	10670700	10671000	-0.213514	0.826902	105.6	90.6717
									Chr2	1485000	1485300	-0.173577	0.827046	25.5167	18.9767
									Chr1	13657200	13658400	0.153808	0.827152	43.5367	43.27
									Chr3	22539000	22539300	0.165696	0.827364	39.82	46.3767
									Chr3	10572900	10573200	0.199091	0.827937	49.9733	60.0417
									Chr2	3057300	3057600	-0.011636	0.828277	56.7233	60.16
									Chr1	16365000	16368600	0.106545	0.828628	685.44	737.15
									Chr1	13235700	13236000	0.0598993	0.829004	478.508	521.073
									Chr3	11434200	11434500	0.159679	0.82912	535.08	604.173
									Chr4	2334000	2334300	0.260775	0.829737	31.8767	42.9267
									Chr4	2794200	2794800	-0.207401	0.830224	82.0767	70.6133
									Chr5	10415400	10416600	0.212869	0.830267	56.86	77.4633
									Chr1	16773600	16773900	0.114153	0.83051	86.9933	104.51
									Chr5	13624200	13624800	-0.20202	0.830521	93.4133	77.33
									Chr3	15618300	15618900	0.184343	0.830722	117.863	135.45
									Chr4	5429100	5429400	0.267269	0.830848	17.1583	19.5067
									Chr2	2283900	2284200	0.261981	0.8312	104.848	116.655
									Chr4	2339400	2340300	-0.169814	0.831205	181.153	161.433
									Chr2	11107500	11108100	0.16201	0.831422	118.843	134.927
									Chr4	4922700	4923300	0.0218806	0.831677	32.0733	28.67
									Chr5	10922700	10923600	-0.0407088	0.831754	300.89	292.227
									Chr4	6786300	6787200	0.217693	0.831757	63.69	79.2833
									Chr1	13420800	13425000	0.0371799	0.831794	71.8567	61.2167
									Chr5	21699900	21700200	-0.270756	0.832005	30.5917	26.05
									Chr1	13236300	13236600	-0.131168	0.832013	318.123	306.28
									Chr2	1227900	1228200	-0.311827	0.832303	22.3367	16.5267
									Chr5	10688100	10688400	0.147355	0.83278	100.9	109.628
									Chr3	15620400	15621600	0.161068	0.832874	364.893	442.155
									Chr3	12981300	12981600	0.126024	0.832883	50.13	52.7667
									Chr5	19640100	19640700	0.205308	0.832999	49.3733	65.1933
									Chr1	4596900	4597200	0.252843	0.83307	27.3133	34.2283
									Chr2	5739000	5739600	0.0295125	0.83314	50.0367	61.7033
									Chr2	3031800	3032100	0.28441	0.83343	32.1667	36.38
									Chr1	16604100	16606200	-0.0916437	0.833807	729.583	892.16
									Chr3	12264600	12264900	0.0460476	0.833921	409.3	422.323
									Chr1	14018100	14018400	0.1193	0.834301	101.075	110.522
									Chr1	13983000	13983600	-0.272387	0.834725	35.8233	28.49
									Chr2	10872900	10873200	0.216844	0.834989	39.7217	47.4633
									Chr5	24945000	24945600	0.223489	0.835154	66.1167	84.5267
									Chr1	11817000	11817300	0.201555	0.835427	25.67	31.1633
									Chr3	14685000	14685300	0.127203	0.836038	849.26	966.987
									Chr2	2296800	2297100	0.141027	0.836117	154.06	176.567
									Chr3	12013200	12013500	-0.150323	0.836194	412.12	416.723
									Chr5	9623100	9623400	-0.008835	0.836521	39.005	37.1567
									Chr2	4338600	4340400	0.114286	0.836751	260.077	268.67
									Chr1	12466800	12467400	-0.219252	0.836813	55.7967	45.64
									Chr5	13691400	13692600	0.0761951	0.837035	366.932	406.13
									Chr4	1756500	1756800	-0.23336	0.837075	12.235	7.64
									Chr5	15052800	15053100	-0.324701	0.83715	16.78	11.27
									Chr4	6017100	6017400	-0.242875	0.837175	40.36	33.05
									Chr1	16669800	16670400	0.183191	0.837429	7.55	9.89667
									Chr2	687300	688200	0.193021	0.838301	52.6233	67.2733
									Chr2	5590800	5591700	-0.110236	0.838777	683.348	680.208
									Chr2	2226600	2228700	0.021118	0.838962	890.503	898.52
									Chr2	6307800	6308100	-0.00965334	0.839335	24.29	21.44
									Chr2	5612400	5613000	0.0180246	0.839364	831.18	834.73
									Chr3	15737100	15738000	-0.244291	0.840051	62.2167	62.03
									Chr5	13693200	13693500	-0.164815	0.840051	121.763	110.137
									Chr3	17260500	17260800	-0.23753	0.840071	52.6733	43.0467
									Chr5	14100600	14101200	-0.294254	0.840071	27.1067	23.27
									Chr2	7682400	7682700	-0.0814217	0.840958	34.6167	21.91
									Chr1	7748100	7748400	0.256247	0.84104	42.3283	48.725
									Chr3	11232600	11232900	0.165225	0.841231	150.813	170.817
									Chr5	10572300	10573200	0.157897	0.841268	361.657	386.407
									Chr2	4006800	4007100	-0.257102	0.841511	106.357	73.5967
									Chr4	17044500	17044800	-0.160737	0.841526	60.1633	51.13
									Chr5	16585500	16585800	0.237838	0.841549	32.5467	39.74
									Chr1	13435800	13436100	0.0178982	0.84161	139.86	149.787
									Chr5	9847800	9848100	-0.243512	0.841668	54.98	45.67
									Chr3	11502000	11502300	-0.269092	0.842068	34.6567	27.2767
									Chr4	5613600	5613900	-0.0333405	0.842264	26.2133	23.49
									Chr1	17020500	17020800	0.24059	0.842341	41.9817	51.1683
									Chr1	13654500	13654800	0.191937	0.842593	86.0917	99.21
									Chr4	5416500	5416800	-0.267161	0.842844	30.785	24.2633
									Chr1	7138200	7138500	-0.232985	0.84314	16.9567	13.3
									Chr2	1857300	1857600	-0.222434	0.843507	27.9167	25.74
									Chr2	2821200	2822700	-0.226192	0.843516	145.293	119.007
									Chr3	8661900	8662200	-0.157018	0.843877	115.172	102.802
									Chr5	19504800	19505100	-0.286177	0.843904	22.4833	17.54
									Chr2	3797100	3798000	0.0382456	0.843974	211.01	162.36
									Chr5	14311800	14312100	0.134762	0.843974	664.163	692.683
									Chr1	15965700	15966000	-0.231481	0.844111	84.1433	70.7383
									Chr5	10837800	10838400	-0.123546	0.84479	623.093	645.67
									Chr1	8513400	8514000	-0.284577	0.845109	25.0167	19.6633
									Chr2	987600	987900	-0.309462	0.845346	47.45	33.21
									Chr4	6812400	6812700	0.204396	0.845733	51.2133	83.9933
									Chr2	2988900	2989200	0.186134	0.845786	57.245	65.545
									Chr1	16924800	16925400	0.274101	0.846031	87.6233	130.207
									Chr3	8303700	8304000	-0.145914	0.846134	6.54	5.75
									Chr5	15699900	15700200	0.187641	0.846366	103.477	119
									Chr2	6738600	6739200	-0.158024	0.846807	234.337	189.687
									Chr2	5747100	5747400	0.244517	0.846809	33.165	41.5583
									Chr2	1345500	1346100	0.183254	0.846911	56.1133	65.69
									Chr3	13452900	13453200	-0.282264	0.846925	26.9067	21.2383
									Chr3	16939200	16939800	-0.186718	0.847083	56.2067	42.03
									Chr2	1728600	1728900	0.010528	0.847165	31.27	36.6033
									Chr4	2103900	2104200	0.117148	0.847235	75.0233	81.2567
									Chr2	5157900	5158500	0.198433	0.847413	77.7167	89.5867
									Chr1	13242300	13246800	0.00874776	0.847895	420.117	393.093
									Chr1	13874700	13877100	0.0941202	0.848476	206.903	207.417
									Chr5	10840500	10840800	0.154972	0.848526	181.447	204.677
									Chr2	5787900	5788200	0.144768	0.848959	102.878	115.89
									Chr2	3159300	3160200	0.0672128	0.849543	16.1567	16.93
									Chr3	11198100	11198400	0.288226	0.849593	16.9717	21.775
									Chr4	3299700	3300000	-0.215165	0.849996	55.5483	47.0667
									Chr1	16025400	16025700	0.0285864	0.850425	921.697	941.257
									Chr1	12926100	12927000	0.212305	0.85057	68.8067	76.8133
									Chr5	18533700	18534000	0.205103	0.851326	15.3633	18.2483
									Chr5	17826900	17827200	0.0792775	0.851542	18.68	21.18
									Chr2	4327200	4327800	0.116612	0.851544	394.12	345.287
									Chr5	10830300	10831200	-0.216478	0.852232	45.75	46.4833
									Chr1	13220400	13220700	0.19644	0.852966	58.8633	83.4767
									Chr3	14458500	14458800	0.127398	0.853342	463.302	509.643
									Chr4	2165700	2166300	0.180988	0.853568	73.6333	83.96
									Chr2	1304400	1304700	0.036481	0.85439	52.08	54.2633
									Chr5	10534200	10535400	-0.163798	0.854508	286.452	270.12
									Chr1	16023900	16024200	-0.143705	0.854595	208.055	186.013
									Chr5	9806700	9807000	0.161382	0.854695	35.18	39.7383
									Chr5	10219800	10220100	-0.224681	0.854944	55.3367	46.59
									Chr4	11380200	11380500	0.274463	0.855119	35.9333	42
									Chr5	13976100	13977300	0.194356	0.8555	87.3267	99.2633
									Chr3	14993100	14993700	0.198952	0.855778	48.0733	53.88
									Chr4	4206900	4207200	0.036717	0.855969	157.327	167.84
									Chr3	15625800	15627000	-0.191014	0.856089	100.853	82.1417
									Chr4	14272200	14272500	-0.208317	0.856339	49.3533	37.7233
									Chr5	14627700	14628000	-0.112907	0.856687	48.9117	46.5317
									Chr3	10953000	10953300	0.166756	0.856959	116.997	131.37
									Chr3	15897600	15897900	-0.212315	0.856959	53.9133	48.1133
									Chr4	4169400	4169700	0.182036	0.856959	96.3567	108.883
									Chr3	12240300	12241200	-0.203269	0.857302	328.663	265.967
									Chr5	13974000	13974300	-0.182189	0.85744	111.35	101.487
									Chr3	15366300	15366600	0.017109	0.857494	50.7483	48.6433
									Chr2	2728500	2729400	0.0653774	0.857714	118.54	128.827
									Chr2	2994900	2995500	0.207528	0.858442	57.3433	58.7633
									Chr3	11762400	11762700	-0.259025	0.858468	29.67	23.5567
									Chr4	5214000	5214600	-0.13208	0.858728	48.3533	42.4133
									Chr5	8922600	8922900	0.264543	0.858728	22.2733	28.0067
									Chr4	6102900	6103200	-0.166893	0.858777	39.2633	33.1367
									Chr3	11947800	11948400	0.274549	0.859002	22.8	29.21
									Chr2	7844700	7845000	-0.17138	0.859004	127.085	132.072
									Chr1	13521900	13522500	-0.171288	0.859252	58.37	51.2667
									Chr2	13578900	13579200	-0.207222	0.859661	20.9217	16.01
									Chr3	11474700	11475900	0.067084	0.860001	132.19	147.398
									Chr2	4894500	4894800	0.184619	0.860302	47.0117	55.7217
									Chr2	4334400	4335900	0.043242	0.86048	565.167	595.443
									Chr5	17089500	17089800	-0.172877	0.860792	27.99	25.4517
									Chr1	17092200	17092500	0.128687	0.86212	73.6033	81.3833
									Chr4	9173700	9174000	-0.275144	0.862615	21.29	17.295
									Chr2	3937800	3938700	0.180616	0.862671	89.9383	108.542
									Chr1	14037300	14037600	-0.263213	0.862716	28.1117	22.125
									Chr2	8883000	8883900	-0.11399	0.86311	37.3783	38.9833
									Chr4	4081500	4082400	-0.172563	0.863125	98.5367	85.6
									Chr1	13239600	13239900	-0.0723335	0.8634	510.883	510.403
									Chr2	677100	677400	0.202217	0.863546	68.5133	80.5117
									Chr1	13080900	13081200	0.100997	0.863723	59.2433	61.4733
									Chr5	16015500	16015800	0.146169	0.863824	290.712	318.738
									Chr1	11452500	11452800	0.261846	0.863837	16.8767	22.0017
									Chr3	15735000	15735900	0.115354	0.863939	411.728	428.287
									Chr4	6886200	6886800	0.037757	0.864087	70.18	71.75
									Chr2	2485800	2486700	0.136047	0.864128	268.372	292.733
									Chr3	10604700	10605000	-0.240568	0.864255	37.4933	30.54
									Chr5	7377900	7378200	-0.191239	0.864648	54.2667	51.5667
									Chr4	4845000	4845300	-0.149232	0.864843	197.683	166.293
									Chr2	276600	276900	-0.230231	0.864894	94.19	82.5467
									Chr2	5318400	5320200	0.0457045	0.865162	66.6733	67.96
									Chr3	12875400	12875700	0.122582	0.865192	182.677	205.393
									Chr3	11785200	11785800	0.230859	0.865551	31.2867	36.14
									Chr1	12927900	12928200	0.0093585	0.865611	184.815	182.363
									Chr3	14313300	14313600	-0.131484	0.865749	74.57	69.2417
									Chr2	4590600	4591200	0.171455	0.865799	63.4733	75.24
									Chr5	13821900	13822200	0.0634822	0.86603	111.998	117.588
									Chr5	13452600	13452900	-0.111604	0.866084	1042.46	957.37
									Chr2	9313200	9313500	0.289663	0.866221	73.54	93.91
									Chr1	13807500	13807800	-0.116029	0.866279	87.2667	83.6783
									Chr2	4338000	4338300	0.118464	0.866668	1262.16	1328.71
									Chr5	10559400	10562400	-0.0127865	0.866989	671.387	680.997
									Chr2	11160300	11160600	-0.194511	0.867335	61.8633	53.085
									Chr3	14469000	14469600	0.184317	0.867402	82.26	93.97
									Chr3	11471400	11471700	0.105681	0.867432	899.043	891.887
									Chr2	7240800	7242000	0.195302	0.867504	48.02	64.6967
									Chr5	13693800	13694700	-0.057364	0.867656	242.578	255.397
									Chr5	14186700	14187300	0.120117	0.867692	226.947	253.73
									Chr5	10699800	10700100	0.129706	0.868072	146.81	216.127
									Chr5	10215900	10218000	0.0343412	0.868139	134.237	141.333
									Chr2	5944200	5945100	0.0376911	0.868146	780.598	854.607
									Chr1	13345500	13345800	-0.165484	0.868327	110.288	97.25
									Chr2	5946000	5946600	-0.164179	0.868419	368.307	332.85
									Chr5	7554000	7554600	-0.133704	0.868537	337.813	304.627
									Chr5	12497400	12497700	-0.269187	0.868781	22.92	16.6033
									Chr5	10283100	10283400	0.149553	0.868892	84.7483	96.3767
									Chr2	6637200	6637500	0.282988	0.868951	38.58	38.3367
									Chr1	14153100	14153400	0.217792	0.869058	94.3917	100.365
									Chr1	13725300	13726200	-0.146452	0.86932	199.617	178.833
									Chr2	1939500	1940100	-0.0551912	0.86932	23.0933	29.69
									Chr3	16905600	16906500	0.0375492	0.869323	30.6483	34.0267
									Chr1	12548100	12548400	0.217192	0.869375	39.4117	48.1
									Chr1	16590300	16590900	-0.00828296	0.869447	174.847	204.093
									Chr1	13869000	13869600	-0.116881	0.86997	632.967	519.657
									Chr5	13139400	13139700	-0.00235142	0.870334	66.8533	69.7233
									Chr3	11241000	11241300	0.151517	0.870492	73.9467	64.4533
									Chr3	15440100	15440400	-0.134667	0.870602	81.325	72.325
									Chr2	4538700	4539000	0.0941137	0.870657	442.713	469.993
									Chr3	15168000	15168300	-0.147976	0.870705	356.66	282.36
									Chr1	16068600	16068900	0.129668	0.871582	190.877	208.933
									Chr2	6494100	6497100	0.113021	0.871582	621.057	536.9
									Chr5	10537500	10538700	-0.0996149	0.871661	170.897	166.065
									Chr5	10565100	10565400	-0.21726	0.872108	48.9567	40.2667
									Chr4	1962900	1963200	0.0916547	0.872315	75.555	82.7267
									Chr4	1861200	1861500	-0.192534	0.872456	52.9367	46.0767
									Chr4	2641800	2642400	0.17422	0.872846	170.26	187.05
									Chr3	15898500	15899100	0.144199	0.873253	196.997	214.873
									Chr3	10804500	10804800	0.104644	0.87369	30.5567	32.935
									Chr1	12923400	12924300	-0.21148	0.873947	31.395	28.8367
									Chr4	5560200	5560500	-0.111781	0.873947	3799.11	3408.67
									Chr1	13305600	13305900	-0.0457045	0.874049	204.897	196.06
									Chr5	21015000	21015300	0.194455	0.874067	59.3333	63.9867
									Chr3	14743200	14743500	0.184161	0.874511	62.4467	72.6067
									Chr2	4829100	4829700	0.181404	0.874524	69.1633	73.3567
									Chr3	11376300	11376600	-0.188998	0.874827	74.2167	63.48
									Chr3	15736500	15736800	-0.0879364	0.874889	192.66	186.83
									Chr2	5407800	5408400	0.23176	0.875105	27.4	33.19
									Chr5	13854900	13855200	-0.182973	0.875131	110.103	107.038
									Chr4	1657500	1658400	-0.134614	0.875225	272.94	233.82
									Chr5	17926200	17926500	-0.169871	0.875733	100.317	109.363
									Chr5	18012600	18012900	-0.0174296	0.876228	106.307	104.113
									Chr1	16167300	16167600	0.14149	0.876436	84.2883	91.805
									Chr5	9811800	9812100	0.149174	0.87666	69.3967	61.0467
									Chr2	2193900	2194200	0.121087	0.876781	239.308	262.098
									Chr4	4120500	4120800	-0.190643	0.877132	50.1117	44.9183
									Chr3	15957300	15957900	-0.082789	0.877496	26.5767	24.4133
									Chr4	4611300	4611600	-0.0705035	0.877543	35.6667	31.8833
									Chr2	5645700	5646000	-0.18318	0.878013	66.7	57.6383
									Chr1	13419900	13420500	0.187767	0.878341	50.8633	58.9233
									Chr1	16064100	16064400	0.117637	0.87851	309.51	334.888
									Chr1	16035300	16035600	0.021704	0.878625	23.83	24.58
									Chr5	17196900	17197200	0.110244	0.878634	267.955	289.837
									Chr1	13480800	13481100	-0.0799609	0.878756	168.08	157.073
									Chr1	15992400	15993600	-0.0587657	0.878907	119.337	127.597
									Chr3	15365700	15366000	-0.0785179	0.879088	58.5083	53.8417
									Chr2	5122200	5122500	-0.162907	0.879335	90.1033	79.9067
									Chr2	1863600	1863900	-0.280745	0.879503	10.9667	7.93667
									Chr3	11064600	11064900	-0.10199	0.879503	55.8133	51.6767
									Chr4	7236900	7237200	0.197773	0.879509	43.025	51.445
									Chr2	4647900	4648200	0.11558	0.879603	251.522	276.112
									Chr4	1600200	1600800	0.0833716	0.879712	503.713	552.55
									Chr3	12806100	12806400	0.0787805	0.880231	73.9633	72.2617
									Chr3	17010900	17011200	-0.0297025	0.880672	77.5717	73.49
									Chr2	2022300	2022600	0.0938088	0.88079	53.7917	62.8
									Chr5	10905900	10906800	0.129089	0.881095	126.85	162.427
									Chr2	5429700	5430600	-0.188532	0.881162	90.3433	73.74
									Chr1	9367500	9367800	-0.155462	0.88127	36.7683	33.1517
									Chr4	8404200	8404500	0.219639	0.881276	16.46	19.8367
									Chr4	6282600	6282900	0.235721	0.881564	20.4467	24.95
									Chr2	5292900	5293800	0.0192877	0.881854	73.28	92.2433
									Chr2	2522700	2524200	-0.135073	0.881924	516.443	488.215
									Chr1	12467700	12468000	0.126317	0.882478	243.668	256.127
									Chr5	14188500	14188800	-0.166404	0.882512	214.44	187.193
									Chr3	12640500	12640800	0.0575201	0.882529	947.317	1013.55
									Chr2	7147500	7148100	0.145343	0.882779	112.443	124.387
									Chr3	12318000	12318600	-0.133382	0.882833	307.65	290.973
									Chr3	15351900	15352200	0.0975764	0.882907	179.593	189.925
									Chr2	486000	486300	-0.122153	0.883001	31.96	29.0333
									Chr4	1660200	1660500	-0.0327349	0.883125	94.6667	106.01
									Chr2	5037300	5037600	-0.206177	0.883652	52.655	43.6083
									Chr1	13108800	13109100	-0.0148072	0.884036	683.543	807.01
									Chr1	15633000	15633600	-0.117588	0.884239	421.677	385.617
									Chr5	15711000	15711300	-0.0188026	0.884485	68.87	91.14
									Chr4	2986500	2986800	0.0102615	0.88452	49.2683	51.0983
									Chr2	2823600	2824200	-0.0987305	0.884549	93.7633	105.71
									Chr2	13031400	13032000	-0.20218	0.884602	60.5367	49.6567
									Chr4	835200	835500	-0.100712	0.884846	9.84	7.52667
									Chr4	1639800	1640400	0.212571	0.884852	44.83	62.9233
									Chr4	4293900	4294200	0.213068	0.884895	19.2833	23.2767
									Chr5	17916600	17916900	0.236218	0.885221	13.1667	13.65
									Chr5	10134600	10134900	0.27468	0.885527	5.59667	7.98333
									Chr3	3188700	3189000	0.0653835	0.885631	20.495	21.885
									Chr2	5400000	5400600	-0.166528	0.886226	88.5267	75.24
									Chr1	16338000	16338900	-0.0751278	0.886346	84.685	80.1667
									Chr4	2100600	2100900	0.157553	0.886468	65.4567	83.4667
									Chr2	1308900	1309500	0.196999	0.887617	39.6633	51.04
									Chr4	2176800	2177100	-0.00150765	0.887617	23.0633	22.9
									Chr3	15631200	15632400	-0.0832616	0.887753	1451.4	1417.17
									Chr3	15608700	15609300	-0.197831	0.88776	53.9067	46.2833
									Chr2	12979500	12979800	0.217511	0.887784	25.6667	30.7283
									Chr2	3800100	3800700	0.17601	0.88792	59.1167	68.0267
									Chr2	13807800	13808100	-0.0280925	0.887969	146.325	147.318
									Chr2	5018100	5018400	0.0552035	0.88907	122.93	125.535
									Chr4	1625100	1627200	-0.0960757	0.889353	287.067	266.26
									Chr3	11725800	11726100	0.0716062	0.889553	31.2567	28.8833
									Chr1	16341600	16342500	-0.122795	0.889818	162.783	155.74
									Chr5	12261600	12261900	0.0815633	0.88986	26.24	27.49
									Chr5	18105300	18105600	0.209531	0.890149	28.1717	33.9067
									Chr5	13051800	13054800	0.00573909	0.890245	320.823	333.543
									Chr2	3572400	3573000	-0.144756	0.89057	121.19	112.423
									Chr5	15992100	15992400	-0.163346	0.890693	75.0267	66.155
									Chr1	13302000	13302300	0.209033	0.890788	36.0433	38.0167
									Chr3	11508600	11509500	0.166506	0.890958	71.275	77.155
									Chr2	4785000	4785300	0.187395	0.890976	34.7667	40.4933
									Chr3	1282800	1283100	-0.229528	0.891064	23.6933	19.38
									Chr3	11182500	11184300	-0.0578322	0.891168	426.427	406.853
									Chr4	5238000	5238300	0.132608	0.891196	98.8967	128.883
									Chr1	13084500	13084800	0.119731	0.891308	249.777	271.777
									Chr2	2357700	2358600	-0.154114	0.891328	87.0567	90.0667
									Chr3	15745200	15745500	-0.247426	0.891638	12.3133	9.38
									Chr2	1293300	1293900	0.113666	0.89166	300.3	385.21
									Chr5	14803800	14804100	-0.231985	0.891709	28.1533	20.65
									Chr3	14910300	14910900	-0.16257	0.891774	93.54	89.5167
									Chr5	19121700	19122300	0.221123	0.891774	24.1533	28.68
									Chr5	15030300	15030600	0.169528	0.891976	58.7333	67.0183
									Chr5	10530300	10530900	-0.169487	0.892086	191.63	186.39
									Chr4	8266200	8267400	-0.0826155	0.89217	142.115	144.155
									Chr1	12507900	12508200	0.236842	0.892173	16.985	21.1067
									Chr5	9956100	9956700	-0.139443	0.892215	62.0933	55.2667
									Chr4	6788400	6789000	-0.137107	0.89241	137.257	118.737
									Chr3	9624600	9625500	0.210391	0.892726	33.8933	37.1383
									Chr3	13176900	13177200	0.185775	0.892876	47.455	55.26
									Chr2	2914200	2915400	0.170161	0.892942	55.6417	57.5367
									Chr5	6295500	6295800	-0.254399	0.892976	13.5667	10.0633
									Chr5	20296200	20296500	-0.185603	0.892992	50.8017	45.08
									Chr2	5423400	5424300	0.0894349	0.893401	491.118	522.357
									Chr5	17290500	17290800	-0.001919	0.893433	20.9017	23.705
									Chr2	5320500	5320800	-0.241348	0.893505	20.5867	16.3567
									Chr3	13494300	13494600	0.0577541	0.893619	393.678	413.982
									Chr5	5855700	5856000	-0.219564	0.893675	21.4117	17.995
									Chr5	16748400	16748700	0.140303	0.893888	115.003	128.137
									Chr1	13082100	13083600	0.0479866	0.894154	212.23	239.373
									Chr2	4348800	4350000	-0.114782	0.894354	363.07	321.183
									Chr5	13435800	13436100	-0.158845	0.894849	101.473	84.7367
									Chr2	4799100	4799400	0.148486	0.895525	71.9167	79.53
									Chr2	3030300	3030900	0.188543	0.895564	37.88	44.89
									Chr3	15609600	15610200	-0.17026	0.895575	65.07	57.9967
									Chr1	12874800	12875100	0.15215	0.895581	20.2533	24.7067
									Chr4	2724300	2724600	-0.0926505	0.896481	72.7817	66.1483
									Chr2	6271500	6272100	0.180182	0.896562	40.86	39.44
									Chr1	10026900	10027200	0.220436	0.897026	24.0467	28.9817
									Chr1	10384200	10384500	-0.018538	0.897629	35.195	35.8517
									Chr5	10040700	10041000	0.222613	0.897722	15.2917	19.4933
									Chr5	13605600	13605900	-0.0353253	0.897876	16.27	15.1033
									Chr1	13056000	13056600	-0.0656847	0.897878	71.31	52.16
									Chr4	5359200	5359500	0.181155	0.897898	31.14	26
									Chr4	5182200	5182500	-0.204692	0.898195	32.3033	29.49
									Chr5	15003000	15003300	-0.0775969	0.898195	41.7767	33.2933
									Chr2	4262400	4263000	-0.0639397	0.898436	165.59	166.723
									Chr2	1018800	1019100	-0.20043	0.898514	37.845	31.5467
									Chr5	20296800	20297100	-0.231588	0.898749	24.9933	18.68
									Chr1	16185300	16185600	-0.206021	0.898749	14.7117	11.755
									Chr4	2795700	2796000	0.0901499	0.898923	92.5867	98.3567
									Chr5	9722100	9722400	0.133394	0.899022	105.413	116.343
									Chr3	15633000	15633300	-0.101974	0.899292	7211.01	5778.18
									Chr1	16239000	16245000	-0.0773991	0.899766	233.553	217.123
									Chr3	14895300	14895600	0.039553	0.9001	28.5283	29.6
									Chr3	15748200	15748800	-0.241909	0.900218	8.15333	4.82667
									Chr1	13862400	13863000	-0.112982	0.900248	386.697	406.37
									Chr1	5394900	5395800	-0.0998913	0.900364	27.36	25.265
									Chr5	14849400	14849700	-0.0595539	0.900373	69.87	65.3333
									Chr2	2295600	2295900	0.123558	0.900403	164.107	175.29
									Chr2	4336200	4337700	0.0800179	0.900526	784.083	963.957
									Chr4	2388600	2388900	0.21145	0.900842	23.7133	29.1317
									Chr1	17766000	17766300	-0.197556	0.900881	27.4267	26.1133
									Chr3	11439600	11440800	-0.0949942	0.900907	58.1233	49.2267
									Chr4	5721000	5721300	0.203163	0.900913	28.2233	34.4033
									Chr3	13480500	13480800	-0.0953597	0.901175	307.865	279.283
									Chr2	1353600	1353900	0.144971	0.901195	30.6133	65.55
									Chr2	3929700	3930300	-0.155646	0.901226	38.8067	34.1067
									Chr1	7851900	7852200	0.0710093	0.901254	31.1367	34.7067
									Chr5	10167300	10168200	-0.134694	0.90144	52.75	44.78
									Chr4	6302700	6303000	-0.232666	0.901786	14.2933	10.9267
									Chr3	13304400	13304700	0.142626	0.902046	99.6133	121.677
									Chr5	12508800	12509400	-0.14457	0.902423	80.28	71.7933
									Chr1	12444000	12445200	0.165405	0.902581	47.09	56.4833
									Chr3	9575700	9576000	0.0755612	0.902852	29.8167	34.4817
									Chr3	8547300	8547600	0.138745	0.902976	54.4383	63.6367
									Chr5	20698800	20699100	-0.156691	0.903248	57.0467	38.1767
									Chr1	16602000	16603800	-0.151442	0.90326	192.593	176.973
									Chr2	5057100	5057700	0.112891	0.903401	51.27	52.85
									Chr5	16856400	16856700	0.171506	0.903401	20.49	24.2333
									Chr3	14904300	14904600	-0.217815	0.904035	27.4267	22.46
									Chr2	2989500	2989800	0.0813068	0.904069	93.9883	101.323
									Chr5	15550200	15550800	0.178756	0.904277	31.0733	39.1867
									Chr5	11451600	11452200	0.0403073	0.904709	67.61	71.6933
									Chr2	4749900	4750500	-0.220339	0.905316	47.45	38.0567
									Chr5	13516200	13516800	0.125452	0.905349	120.39	125.967
									Chr2	180000	180300	-0.107521	0.905354	95.8083	84.1283
									Chr1	13323900	13324800	-0.112991	0.905501	116.85	85.1733
									Chr5	12905400	12906000	0.173766	0.905507	58.1733	54.9333
									Chr2	9717300	9717600	0.0406875	0.905787	47.49	49.1833
									Chr5	11028000	11028300	-0.124436	0.906039	505.327	445.703
									Chr5	9898200	9898500	-0.0747244	0.906142	55.2617	48.905
									Chr2	2990100	2990700	-0.157583	0.906146	43.5867	47.7833
									Chr1	10421700	10422000	0.121208	0.906174	53.4383	64.86
									Chr4	1655700	1656000	0.0050365	0.906198	163.482	163.617
									Chr3	11774700	11775000	-0.027848	0.90625	74.9517	74.7083
									Chr2	2607600	2608800	0.0629178	0.906542	491.107	500.567
									Chr1	13257000	13257300	-0.0773901	0.906933	305.147	314.08
									Chr2	5750100	5751000	-0.039608	0.90717	28.5967	29.6567
									Chr2	5905800	5906100	0.144728	0.907689	43.73	47.9967
									Chr4	12449700	12450000	0.140558	0.907942	8.60667	9.60333
									Chr5	10824900	10825200	-0.148805	0.908141	75.955	67.7283
									Chr2	8881500	8882100	0.102946	0.908162	28.1533	29.3833
									Chr3	11309400	11309700	0.182286	0.908162	30.1233	36.7
									Chr2	7297800	7298100	0.238418	0.908175	21.3867	19.88
									Chr2	5433300	5433600	-0.114781	0.908377	78.645	76.4517
									Chr3	17741100	17741700	0.104275	0.908718	94.8133	102.773
									Chr3	10998000	10998300	0.0538677	0.908953	87.6533	90.67
									Chr1	15647700	15648300	0.127778	0.909315	76.02	84.2367
									Chr4	2265600	2265900	-0.112781	0.909758	197.53	166.917
									Chr3	11441100	11441700	-0.124654	0.909765	284.49	256.55
									Chr1	12846900	12847200	-0.181073	0.909921	42.2833	36.2433
									Chr2	5165100	5165400	0.121663	0.910036	111.705	119.745
									Chr5	10757100	10757400	0.0889242	0.910096	432.913	463.688
									Chr4	3801300	3801900	0.120635	0.910176	149.087	161.193
									Chr2	6966600	6969900	-0.00330811	0.910177	223.638	221.075
									Chr1	13089000	13089300	0.0103431	0.910537	103.49	114.163
									Chr5	8763900	8764200	-0.212006	0.910902	20.2967	16.6967
									Chr2	3852900	3853500	0.01552	0.911163	26.4933	30.89
									Chr2	3529800	3530400	-0.0888307	0.911216	301.513	324.67
									Chr4	3807000	3807300	-0.146628	0.911216	172.307	151.06
									Chr2	6736200	6737100	0.00491115	0.911377	118.543	121.23
									Chr2	4962300	4962600	-0.0262653	0.91192	644.005	638.31
									Chr4	2642700	2643000	-0.0395488	0.912186	79.615	77.24
									Chr5	10480500	10480800	-0.139594	0.91238	25.0517	24.51
									Chr5	13093500	13093800	-0.132342	0.912423	84.6917	76.5617
									Chr5	8223900	8224200	-0.153258	0.912766	57.285	51.0633
									Chr2	4536300	4536900	0.00706522	0.912781	84.2167	70.3433
									Chr3	12623700	12624000	-0.106052	0.913274	43.78	41.7783
									Chr4	8264700	8265600	-0.09107	0.91363	616.743	576.087
									Chr4	6113100	6113700	-0.0981605	0.913667	57.5567	55.5067
									Chr5	11282400	11282700	0.111619	0.913989	71.2533	72.9
									Chr5	14015700	14016000	0.149107	0.914173	47.4267	53.4483
									Chr5	11539500	11540400	0.139238	0.914339	75.7	82.67
									Chr3	16625700	16626000	-0.159734	0.914374	16.195	15.0667
									Chr2	5313300	5313600	-0.0458078	0.914937	98.935	98.9767
									Chr5	12491100	12491700	0.0751933	0.915095	45.0533	43.3933
									Chr3	11225700	11226000	0.0522654	0.915246	2254.3	2391.73
									Chr2	5803200	5803500	-0.179031	0.915309	15.51	12.2767
									Chr5	10820100	10820400	-0.0932301	0.915506	334.042	317.615
									Chr5	11545500	11545800	0.119129	0.915524	118.51	132.248
									Chr3	20024100	20024400	0.129937	0.915569	68.4217	73.3033
									Chr3	12670200	12670500	0.0764471	0.91593	680.32	735.943
									Chr3	12318900	12319200	-0.0201365	0.915938	218.223	215.727
									Chr3	11809200	11809500	-0.15237	0.916212	51.2067	46.3
									Chr4	12598800	12599400	0.126063	0.916289	21.3633	36.5933
									Chr2	4755900	4756200	0.0604715	0.917632	211.053	224.823
									Chr4	7801500	7801800	0.151008	0.917686	27.8883	32.6267
									Chr4	2526900	2527500	0.167558	0.917788	69.4233	80.23
									Chr5	18647700	18648000	0.130556	0.917795	16.7733	19.9833
									Chr1	16452300	16452600	-0.115976	0.91809	108.003	97.8317
									Chr4	4612500	4614600	0.135599	0.918178	71.3567	85.12
									Chr2	1941000	1941300	0.166712	0.918251	35.4533	40.15
									Chr4	5409300	5409600	-0.15546	0.918252	52.1017	46.6683
									Chr3	12137100	12137400	0.10745	0.918354	360.682	380.888
									Chr5	10116300	10116900	-0.0859863	0.918434	225.833	261.477
									Chr5	13498200	13499400	0.0688898	0.918469	75.5217	84.8183
									Chr4	1782900	1783500	-0.12109	0.918519	19.7	15.8633
									Chr1	13668000	13668600	0.125291	0.918932	18.1233	16.7467
									Chr2	3168900	3169500	0.0962739	0.919037	128.43	146.65
									Chr5	16109700	16110000	-0.0975349	0.919038	109.025	100.092
									Chr5	10074600	10075200	-0.100114	0.919716	1084.55	1016.97
									Chr5	9347700	9348000	0.129758	0.920028	90.9983	100.223
									Chr3	11719200	11719800	-0.0280876	0.920144	16.43	13.4267
									Chr2	904200	904500	-0.172284	0.920199	347.08	352.153
									Chr3	11251800	11252100	-0.171759	0.920294	27.3133	23.6683
									Chr3	17238300	17238600	-0.2118	0.920301	14.52	11.9633
									Chr5	16914600	16914900	-0.177288	0.920443	51.1433	44.1833
									Chr2	4754100	4755300	-0.0983419	0.920469	143.363	145.297
									Chr2	8824500	8824800	-0.217009	0.920549	9.53	7.13667
									Chr4	5672400	5673000	-0.118652	0.920549	221.237	203.453
									Chr1	17378100	17378400	-0.191458	0.920556	11.4867	8.75667
									Chr3	15948000	15948300	-0.149872	0.920682	59.25	59.8
									Chr1	12445500	12446700	0.170877	0.920775	41.4633	58.9
									Chr3	11498400	11498700	-0.0836377	0.92083	70.3967	69.8733
									Chr2	6402600	6402900	0.124666	0.920844	47.6167	43.7133
									Chr3	12631200	12631500	-0.137019	0.920861	61.2533	48.2133
									Chr4	4917600	4917900	0.0539346	0.920928	110.893	127.533
									Chr5	10894800	10897500	0.0824181	0.920997	361.633	435.007
									Chr2	11326500	11326800	0.159298	0.921035	41.0567	46.8983
									Chr2	2637000	2637600	-0.156388	0.92116	45.9533	39.8833
									Chr1	13070700	13071000	0.164999	0.921215	25.9417	32.14
									Chr5	10117500	10117800	-0.0188038	0.921405	383.795	378.195
									Chr5	11544300	11544900	0.137566	0.921418	58.82	65.8433
									Chr5	8156400	8156700	0.163674	0.921529	58.54	67.8367
									Chr1	16340400	16340700	-0.100676	0.921756	239.107	217.507
									Chr2	4566000	4566300	-0.0470434	0.921941	161.183	165.9
									Chr2	3795600	3796800	0.0984135	0.922064	281.307	295.748
									Chr4	7823700	7824000	-0.154538	0.922086	28.62	25.3033
									Chr2	8641500	8641800	-0.159373	0.922127	43.6267	38.405
									Chr5	9323400	9324600	0.0240021	0.922176	72.4867	66.0183
									Chr2	2993700	2994600	-0.194065	0.922394	31.4567	21.44
									Chr4	4163700	4164000	-0.179164	0.922414	17.4117	14.4783
									Chr1	12435000	12435300	-0.169027	0.922529	98.1633	87.1967
									Chr1	16052700	16053000	-0.165376	0.922545	32.4483	27.6833
									Chr2	2534400	2535300	0.10539	0.922589	260.467	325.033
									Chr3	11435400	11435700	-0.12734	0.922982	123.493	111.733
									Chr3	17775900	17776500	0.140639	0.922982	59.5967	65.3833
									Chr4	12095400	12095700	-0.0493751	0.92306	17.7	19.6867
									Chr3	8067300	8067600	-0.18819	0.923221	25.6533	21.325
									Chr2	4648500	4649100	-0.0922632	0.923324	170.297	181.077
									Chr3	2617200	2617500	-0.106778	0.92338	48.32	53.8367
									Chr3	20676300	20676600	-0.198206	0.923401	16.2283	13.2783
									Chr3	11373000	11373300	0.113169	0.923452	125.333	136.11
									Chr1	12556500	12556800	0.0954484	0.923542	298.672	318.358
									Chr4	2612400	2612700	0.206152	0.924019	7.76333	11.2667
									Chr2	4772100	4772700	0.0964712	0.924403	204.613	207.117
									Chr5	10909800	10910700	-0.121464	0.924528	137.442	122.297
									Chr4	3427800	3428100	-0.0894969	0.924617	42.7667	46.4833
									Chr5	14655000	14655300	-0.0111582	0.92485	23.16	22.71
									Chr2	9440400	9441000	0.0193765	0.924867	13.7783	14.985
									Chr4	4122000	4122600	0.129086	0.925486	81.2333	82.0233
									Chr5	10698300	10699500	-0.153333	0.925792	70.4633	60.915
									Chr2	2913300	2913600	0.13672	0.926259	41.0583	45.2583
									Chr5	10291500	10291800	-0.0940823	0.926376	192.527	178.09
									Chr5	15120900	15121200	-0.162015	0.926454	31.85	27.57
									Chr2	4786500	4787400	0.158376	0.926655	34.7267	47.5467
									Chr2	6247500	6247800	-0.13972	0.926689	34.065	30.7367
									Chr5	26970600	26970900	-0.184717	0.926722	21.2683	17.8617
									Chr2	1198800	1199400	-0.00602164	0.926766	19.6	16.2367
									Chr3	9643500	9643800	-0.067215	0.926813	25.945	26.5567
									Chr1	13638300	13638900	-0.140955	0.926933	131.837	118.67
									Chr1	4415400	4416000	-0.120215	0.926939	91.6133	83.2
									Chr2	5816100	5816400	0.121177	0.927276	77.91	84.725
									Chr3	12136500	12136800	0.111907	0.927292	151.055	163.882
									Chr2	1523400	1523700	0.159835	0.927315	23.4067	26.88
									Chr1	6471000	6471300	0.0131565	0.927771	29.735	31.605
									Chr3	1674600	1674900	-0.131081	0.927915	25.935	23.205
									Chr1	14151300	14151600	-0.0411905	0.928449	21.255	20.2533
									Chr2	4326600	4326900	-0.0915017	0.92846	205.897	218.7
									Chr4	4813500	4814100	-0.0846319	0.928733	240.05	226.79
									Chr4	1438800	1439100	0.0780672	0.928845	384.063	430.307
									Chr4	4088700	4089300	-0.0447436	0.928976	219	232.707
									Chr4	4205400	4206300	0.007786	0.928976	193.562	206.353
									Chr3	11894700	11895000	0.0620483	0.929137	37.9017	42.9533
									Chr1	16020000	16020600	-0.0976878	0.929147	413.453	397.837
									Chr3	11478300	11478600	0.0161495	0.929156	25.5417	27.0433
									Chr5	15640800	15641100	-0.193564	0.929376	94.41	80.9467
									Chr4	8592300	8592600	-0.0601225	0.929524	25.855	25.2867
									Chr4	4862700	4863300	0.154769	0.929623	39.01	48.4667
									Chr3	12454500	12454800	-0.115112	0.929832	34.1517	32.195
									Chr1	15991800	15992100	-0.0653384	0.929886	713.8	666.083
									Chr1	16173900	16174500	-0.113007	0.930016	92.91	85.64
									Chr4	9675600	9676200	-0.16024	0.930063	48.675	43.4133
									Chr3	5815200	5815800	0.080299	0.930165	32.2833	36.615
									Chr2	4331700	4332600	-0.119071	0.930259	157.67	149.823
									Chr3	11751300	11751600	0.0523023	0.931037	117.822	123.55
									Chr3	12266400	12267600	0.0610972	0.931081	506.36	532.987
									Chr3	16549200	16549800	0.14502	0.931338	51.6267	59.6667
									Chr5	13592400	13593300	-0.0224696	0.931502	39.3733	46.3167
									Chr1	13241100	13241700	0.0733967	0.93152	698.7	631.96
									Chr3	15622200	15622500	0.055212	0.931617	89.2167	80.3667
									Chr5	13980000	13981800	-0.0564927	0.931697	252.883	221.727
									Chr3	11733000	11733300	0.139291	0.931723	35.3267	37.4633
									Chr2	4869300	4869900	-0.0775117	0.932036	74.2367	65.5033
									Chr1	17510100	17510400	-0.16229	0.932168	18.7383	16.1817
									Chr4	4082700	4083600	-0.155384	0.932253	104.753	73.3567
									Chr1	16064700	16065000	0.0656782	0.932286	212.41	223.238
									Chr2	4147500	4147800	-0.121773	0.932835	44.0567	41.2867
									Chr2	4623600	4623900	0.0527697	0.933127	283.557	295.427
									Chr1	13247400	13248000	-0.0711143	0.933558	944.22	896.55
									Chr3	13267800	13268400	0.0951551	0.933653	181.163	195.76
									Chr2	1349100	1349400	-0.133689	0.933733	41.535	37.6733
									Chr5	10666200	10666500	0.133379	0.933821	25.5033	31.7567
									Chr1	12440400	12440700	-0.173657	0.934113	17.2167	13.8467
									Chr2	144000	144300	0.153163	0.934145	26.495	30.3817
									Chr4	2457900	2458200	0.0254585	0.934177	28.2067	28.3833
									Chr2	1179000	1179600	0.0283064	0.934247	29.6633	33.77
									Chr2	4103400	4104000	-0.032843	0.934715	155.88	152.553
									Chr1	13106700	13107000	-0.124898	0.934763	62.735	56.9383
									Chr4	7251300	7251600	0.177641	0.935193	18.52	21.7483
									Chr1	15907500	15909300	-0.0329905	0.935322	71.4467	70.28
									Chr5	10893000	10894200	-0.098467	0.935415	181.508	170.278
									Chr5	10041300	10041600	-0.136722	0.935454	18.2417	16.62
									Chr3	3837000	3837300	0.0290712	0.935468	56.2533	57.5367
									Chr3	9019800	9020100	-0.182956	0.93555	12.9367	9.64333
									Chr2	1857900	1858200	0.0448506	0.935612	43.68	44.6067
									Chr5	17396700	17397000	-0.115298	0.935657	80.59	73
									Chr2	4322700	4323000	-0.137239	0.935763	45.1883	39.515
									Chr3	16070700	16071000	-0.138551	0.935827	71.295	65.175
									Chr2	1362300	1362900	0.141625	0.93589	30.9733	34.8117
									Chr3	12798000	12798300	-0.116341	0.936099	65.3167	60.6033
									Chr3	12609300	12609600	-0.0985043	0.936249	150.74	139.095
									Chr3	11272200	11272800	0.154359	0.936388	44.5967	65.1633
									Chr2	2219700	2221500	0.0486493	0.93675	559.357	471.18
									Chr5	9955500	9955800	-0.136852	0.937261	50.74	45.3283
									Chr2	2730600	2731500	0.0119653	0.937529	48.245	51.495
									Chr4	1628400	1629000	0.0343547	0.937549	138.697	140.88
									Chr4	5479200	5479500	0.0963105	0.937584	86.5767	90.91
									Chr3	12630300	12630600	-0.100803	0.938295	61.4333	55.6233
									Chr3	10403400	10403700	-0.135948	0.938749	39.2733	32.35
									Chr4	2071200	2072100	-0.0073095	0.938751	476.865	486.19
									Chr4	7556100	7556400	-0.142432	0.938805	40.78	36.195
									Chr2	2560800	2561100	-0.135934	0.938861	46.5167	40.0233
									Chr2	10635600	10635900	-0.037923	0.939312	65.6133	75.8933
									Chr5	14937600	14937900	-0.156966	0.939389	81.1767	21.35
									Chr1	17442600	17442900	0.141068	0.939996	30.4867	33.8833
									Chr4	6830700	6831000	0.1375	0.94011	20.5867	23.5683
									Chr2	6513900	6514200	-0.0595827	0.940418	586.868	560.542
									Chr3	12611700	12612000	-0.105098	0.940672	83.6583	76.6917
									Chr2	5947200	5947500	-0.0865902	0.940677	246.687	231.347
									Chr4	665400	665700	0.0145457	0.940757	40.68	40.4
									Chr2	12886200	12887400	0.0810669	0.940839	24.8767	26.2917
									Chr5	14746500	14746800	-0.0927987	0.940848	75.6367	69.9367
									Chr2	1306500	1307100	0.118548	0.940934	34.7433	43.0133
									Chr2	2665500	2665800	0.021258	0.940959	65.485	68.9183
									Chr5	14922000	14922600	-0.14789	0.94121	28.39	25.5033
									Chr4	4086300	4086900	-0.0475586	0.941298	74.73	71.9233
									Chr1	13870800	13873500	-0.0518569	0.941585	83.9467	91.2533
									Chr2	5421900	5423100	0.0804792	0.942312	133.593	152.412
									Chr3	15020400	15020700	0.0677244	0.942312	220.707	206.613
									Chr4	3893100	3893400	0.0731111	0.942886	125.382	133.318
									Chr4	4083900	4086000	0.100426	0.943311	64.6367	80.5167
									Chr3	8027100	8027400	0.0942875	0.943357	62.9867	68.305
									Chr2	1597800	1598100	-0.154355	0.943367	14.9567	12.4367
									Chr4	5978100	5978400	0.0685227	0.943656	29.6567	31.7233
									Chr5	13517100	13517400	-0.0796632	0.943688	17.0183	15.5733
									Chr5	10419900	10420200	0.0823404	0.943777	162.052	174.182
									Chr2	4332900	4333800	0.0713184	0.944008	618.697	832.213
									Chr3	13538400	13538700	-0.0672708	0.94416	58.4833	59.9167
									Chr1	13527000	13527300	0.137334	0.944266	60.8733	72.71
									Chr4	2085900	2086500	0.119735	0.944306	104.21	103.82
									Chr4	4448700	4449000	-0.133707	0.944388	35.595	31.9717
									Chr4	4638300	4638600	0.0293372	0.944508	53.2383	55.6883
									Chr4	2860800	2861700	0.0280823	0.944742	2556.4	2554.23
									Chr2	6790500	6790800	-0.108352	0.944773	71.0183	65.7633
									Chr5	15828000	15828300	-0.0828234	0.944886	55.0467	50.1533
									Chr5	14310000	14310900	0.0805805	0.944894	156.503	175.038
									Chr3	11233500	11233800	0.0218816	0.944981	118.187	121.805
									Chr5	8702400	8702700	0.138802	0.945033	24.92	31.4
									Chr2	2471100	2471400	0.0837523	0.945333	51.5917	56.6367
									Chr5	14623800	14624100	-0.135926	0.945345	17.23	18.74
									Chr5	9698400	9698700	-0.111692	0.945593	40.4433	39.3967
									Chr4	3770400	3770700	-0.111099	0.945801	67.29	59.14
									Chr3	15698700	15699000	-0.0313543	0.945814	39.26	38.865
									Chr2	2539800	2541000	0.0119728	0.946017	431.088	442.52
									Chr2	2294700	2295000	-0.003014	0.946095	86.755	89.5967
									Chr5	13055400	13058400	0.0423111	0.946147	479.947	516.35
									Chr4	2085000	2085300	0.0830999	0.946267	158.307	171.183
									Chr5	9858900	9859200	-0.142254	0.946458	14.7167	13.2067
									Chr1	12870000	12870600	0.0832864	0.946547	14.7867	16.18
									Chr2	5053500	5054100	-0.00942535	0.946734	67.9133	72.9467
									Chr2	11378700	11379000	-0.048549	0.94674	73.0567	71.6833
									Chr2	1380300	1380600	0.098048	0.946755	40.9333	46.03
									Chr3	15853800	15854100	0.0450155	0.946769	28.0733	25.7533
									Chr2	5386200	5386800	0.0868344	0.946788	131.927	126.04
									Chr5	11445000	11445300	0.101658	0.947241	71.13	75.8267
									Chr2	7242300	7242600	-0.0699623	0.947257	62.6333	57.98
									Chr2	6377700	6378300	-0.122698	0.947285	54.69	48.54
									Chr5	15420600	15420900	-0.130371	0.947466	29.6233	26.61
									Chr3	15348000	15348300	-0.148051	0.94753	16.7167	14.97
									Chr2	11787000	11787300	0.118147	0.947563	92.57	111.19
									Chr2	4654200	4655400	0.0474376	0.947682	73.3967	82.08
									Chr5	9179400	9179700	0.130431	0.947694	25.0633	28.32
									Chr5	14821500	14821800	-0.152425	0.947751	15.925	14.0117
									Chr5	18306600	18306900	0.131962	0.947908	16.36	18.5733
									Chr4	7444200	7444500	-0.130064	0.948103	23.3267	23.1133
									Chr3	9838800	9839100	0.131012	0.948185	21.17	23.5667
									Chr3	11497500	11498100	0.0770211	0.948337	77.1267	85.3333
									Chr3	4410600	4410900	0.108945	0.948631	32.1483	35.4367
									Chr3	15967500	15968100	0.0455557	0.948636	91.21	95.06
									Chr4	4639800	4640400	-0.0855296	0.948685	106.27	106.993
									Chr2	2951100	2951700	0.0817744	0.94871	302.64	320.59
									Chr3	13238400	13239000	0.0747447	0.948934	170.68	180.86
									Chr2	3045000	3045300	0.0688007	0.949044	389.17	410.547
									Chr3	11152200	11152500	0.138843	0.949044	18.9	21.9967
									Chr4	4078500	4079100	-0.00370539	0.94922	35.7767	35.26
									Chr1	15971100	15971400	0.0752644	0.949554	34.8467	38.6067
									Chr3	13234500	13235100	-0.0416789	0.949618	228.233	220.953
									Chr5	20440800	20441100	0.117505	0.949618	29.5267	29.1733
									Chr5	10798500	10799100	-0.0781777	0.949831	151.46	142.303
									Chr1	13731300	13731600	0.0544231	0.94997	150.958	160.785
									Chr3	15134100	15134400	0.0585975	0.950314	225.412	237.167
									Chr5	10539300	10539600	-0.061247	0.950408	145.407	135.678
									Chr2	2991600	2992500	0.117137	0.950621	32.2117	36.2167
									Chr5	13613400	13613700	-0.028669	0.950649	20.3483	19.725
									Chr1	12930900	12931500	-0.0371199	0.950654	283.053	275.57
									Chr3	10337400	10337700	0.128845	0.950906	24.2133	27.6067
									Chr1	13891500	13893900	0.0427929	0.951027	101.067	104.74
									Chr4	3776100	3776400	-0.0657507	0.951062	205.022	195.15
									Chr5	9886800	9887100	0.0870186	0.951646	3.92333	4.96667
									Chr1	12931800	12932100	-0.00866582	0.951892	145.087	130.273
									Chr4	3807900	3808200	-0.0370837	0.952229	85.395	82.275
									Chr2	13541100	13541400	0.13507	0.952303	19.5333	21.39
									Chr4	7927200	7927500	-0.0618473	0.952471	6.4	7.92667
									Chr4	5420700	5421000	-0.0512226	0.952486	16.665	16.1167
									Chr2	2024700	2025000	-0.100429	0.95267	55.9217	51.5333
									Chr3	16083600	16083900	0.0182082	0.952731	27.5067	37.5233
									Chr5	16962000	16962300	-0.0555745	0.953443	16.5967	12.5833
									Chr4	2049300	2049600	0.0721752	0.953469	219.272	231.875
									Chr5	14151600	14151900	-0.0509208	0.953496	1392.23	1340.66
									Chr2	1276500	1276800	-0.108285	0.953585	41.3317	38.01
									Chr2	4567500	4567800	-0.00542735	0.953668	135.473	134.815
									Chr3	14311800	14312100	-0.100563	0.953741	58.88	57.0767
									Chr3	156600	156900	0.0682634	0.953767	31.8933	28.9
									Chr2	2218800	2219100	0.0554472	0.953808	2113.47	2303.08
									Chr2	6197100	6197400	0.0562324	0.953927	19.4867	20.5633
									Chr5	9203700	9204300	-0.0937039	0.954078	65.32	60.41
									Chr5	15093000	15093300	-0.0831587	0.954196	35.26	33.6133
									Chr3	11817300	11819400	0.0376449	0.954432	181.987	188.01
									Chr4	5505600	5505900	-0.0613437	0.954432	703.657	669.883
									Chr4	5217900	5218200	0.0808257	0.954455	63.6	66.9933
									Chr2	2890200	2890500	-0.110996	0.954508	39.3933	37.45
									Chr3	15912000	15912300	0.112571	0.954508	31.6533	33.1733
									Chr2	7135800	7136100	0.0817905	0.955016	70.605	74.6667
									Chr3	11469900	11470200	-0.0870805	0.955201	89.56	82.5917
									Chr2	8175000	8175300	-0.0937386	0.955345	46.23	45.14
									Chr2	2696100	2696400	0.0909604	0.955459	110.305	111.278
									Chr4	5275500	5275800	0.119946	0.955581	21.3333	24.22
									Chr4	5506200	5506500	-0.0952173	0.95561	146.9	146.453
									Chr5	15942300	15942600	0.0718156	0.955738	115.107	122.498
									Chr3	15896100	15896400	0.0552146	0.955809	34.165	35.7067
									Chr2	4767900	4768200	0.0023731	0.95587	236.642	237.853
									Chr1	16880100	16882200	0.0840616	0.955936	70.4433	82.9267
									Chr2	12181200	12181800	-0.0864309	0.955958	83.8317	71.8983
									Chr3	7143000	7143300	0.131134	0.956263	13.0083	14.7733
									Chr3	14520000	14520300	-0.136082	0.956307	21.2767	17.2033
									Chr5	9160800	9161100	-0.0138336	0.956429	60.5133	56.44
									Chr2	11346000	11346300	0.131051	0.956589	13.6617	15.3517
									Chr1	12558300	12558600	-0.0707752	0.956635	136.77	129.525
									Chr4	3771600	3772200	0.0798095	0.956812	122.953	129.427
									Chr3	11982600	11983200	-0.069868	0.95735	147.32	140.643
									Chr3	15399000	15399900	-0.0651966	0.957424	185.173	164.643
									Chr3	16551600	16551900	0.136997	0.9575	19.31	18.52
[truncated: 218 more rows]

## Sheet: Fig 2E
Fig 2E: Loss of paternal NRPD1 has a negligible impact on maternally-biased ISRs
Significant								Not Significant
Chromosome	start	stop	(Log2(pat nrpd1+/-/WT))	padj	average WT	average pat nrpd1+/-		Chromosome	start	stop	(Log2(pat nrpd1+/-/WT))	padj	average WT	average pat nrpd1+/-
Chr3	14314800	14315100	0.947087	0.00134156	829.893	1758.63		Chr3	17842500	17842800	0.823126	0.052659	1016	2024.94
Chr1	446700	447300	0.975963	0.0108043	711.153	1590.37		Chr1	17641800	17642100	0.837861	0.0536926	3530.9	7240.72
Chr5	5749200	5749500	0.985603	0.0116011	130.123	302.702		Chr1	24425400	24426000	0.79827	0.0552675	1965.35	3829.63
Chr2	2867100	2867700	1.02159	0.0149179	137.887	331.905		Chr3	18543300	18543900	0.776258	0.0552675	843.46	1747.19
Chr2	11047500	11047800	1.0223	0.0170417	968.368	2128.09		Chr2	18594000	18594900	0.821021	0.0562162	1657.01	3774.82
Chr1	16884300	16884600	0.967463	0.0201558	1924.34	4076.72		Chr3	20031600	20032800	0.692743	0.0671684	6509.26	9927.63
Chr5	9113700	9114300	0.900427	0.0211236	1439.78	3397.09		Chr1	12728400	12728700	0.731106	0.0679704	5035.8	10141.9
Chr4	12841200	12841500	0.990261	0.0227726	89.3	185.35		Chr5	7648800	7649100	0.781246	0.07304	976.18	1881.9
Chr2	17848500	17848800	0.858422	0.0234941	1507.59	3017.16		Chr4	7592400	7593300	0.808213	0.0746171	2209.55	4193.4
Chr2	10409700	10410000	0.917372	0.0277046	1172.94	2584.06		Chr2	10357800	10358100	0.828735	0.0794982	5518.81	8656.78
Chr5	7639800	7640100	0.853304	0.0287661	1324.75	2698.46		Chr1	23454300	23454900	0.760012	0.079562	1224.93	2007.75
Chr1	24483600	24484200	0.881478	0.0316353	201.583	451.5		Chr2	5661000	5661300	0.816481	0.0821384	2663.01	5574.53
Chr3	14315400	14315700	0.813288	0.0342595	7263.96	14066		Chr1	24482100	24483000	0.816358	0.0891731	1763.68	4630.57
Chr2	7205400	7206300	0.767798	0.0358516	7213.57	12872.5		Chr1	16885200	16885500	0.7684	0.0947211	834.1	1592.04
Chr1	13926000	13926300	0.870331	0.0372655	3495.49	6858.63		Chr1	16818600	16818900	0.731545	0.0987856	1801.7	3306.06
Chr2	11991900	11992800	0.844625	0.0464348	496.873	1019.36		Chr5	22704900	22705200	0.775831	0.102135	921.807	1611.03
Chr5	6439500	6439800	0.880412	0.0482443	201.717	433.402		Chr1	18226500	18227100	0.654414	0.114032	2026.21	3417.95
								Chr5	15340200	15340500	0.751749	0.129977	2515.23	4290.94
								Chr4	12433800	12434400	0.71911	0.133276	1951.54	3574.61
								Chr4	13294200	13294500	0.880655	0.134104	28.7367	62.64
								Chr5	1411500	1411800	0.650597	0.150884	359.51	608.652
								Chr2	639000	639600	0.716954	0.152159	2980.28	5281.89
								Chr3	6295800	6296100	0.768353	0.155418	408.583	882.31
								Chr5	13775100	13775400	0.754619	0.161956	2535.28	4873.83
								Chr2	11044800	11045400	0.657678	0.163804	2994.49	4460.42
								Chr3	10748100	10748400	0.65876	0.173155	794.287	1423.64
								Chr1	11618100	11618700	0.77177	0.174406	158.89	292.635
								Chr5	9801300	9801600	0.71734	0.176595	4413.76	8299.04
								Chr1	4506600	4506900	0.697227	0.192441	4608.96	8586.49
								Chr2	17847300	17847600	0.678505	0.209878	3422.64	6082.9
								Chr4	12484800	12485400	0.643289	0.225937	2762.8	4570.11
								Chr1	16819200	16820100	0.646639	0.232502	202.638	327.885
								Chr3	1210500	1210800	0.599718	0.238095	16656.7	26937.6
								Chr5	16257600	16258500	0.605479	0.241977	1347.94	2239.54
								Chr1	6235800	6236100	0.709384	0.25441	255.25	439.38
								Chr2	8040300	8040900	0.625849	0.25929	921.217	1551.99
								Chr5	20313600	20314200	0.643098	0.271363	2142.61	3722.41
								Chr1	22254300	22254600	0.668501	0.274724	2042	3665.71
								Chr4	9961800	9962100	0.652987	0.281811	1522.21	3090.74
								Chr1	18224700	18225000	0.583985	0.282833	659.807	1088.65
								Chr3	5779200	5779500	0.629847	0.283327	813.69	1167.95
								Chr1	13568400	13569600	0.608468	0.284379	10925.4	18702.7
								Chr3	18357300	18358200	0.678901	0.287232	986.413	1817.34
								Chr3	18812400	18812700	0.649278	0.288568	861.38	1568.94
								Chr5	20771100	20771400	0.784138	0.289274	37.6817	82.6
								Chr4	12863100	12863400	0.703104	0.319101	1353.48	2398.42
								Chr5	22442100	22442400	0.69145	0.323471	96.4833	181.47
								Chr5	13773600	13774200	0.622653	0.340521	2108.02	3543.65
								Chr4	5440200	5440800	0.677718	0.346252	144.81	271.525
								Chr2	4105200	4105500	0.537819	0.357706	579.08	1123.88
								Chr4	12841800	12842400	0.583368	0.359827	3794.29	6134.22
								Chr5	7641000	7641600	0.600574	0.37004	411.607	873.94
								Chr5	22322700	22323000	0.556644	0.389017	1044.55	1674.37
								Chr2	637500	638400	0.584117	0.404236	619.383	1019.59
								Chr3	10748700	10749000	0.594025	0.40513	1096.46	1635.99
								Chr5	17175300	17175900	0.634188	0.406049	165.117	264.765
								Chr3	15682200	15682800	0.515984	0.413428	8021.2	12888
								Chr2	8037900	8038500	0.624036	0.41543	417.923	762.65
								Chr2	5663100	5663400	0.623029	0.417403	377.02	662.242
								Chr5	22704300	22704600	0.473042	0.426531	1527.12	2179.21
								Chr2	7182600	7183200	0.585687	0.432672	520.487	804.71
								Chr5	10178700	10179300	0.572791	0.443039	102.003	140.535
								Chr2	11993400	11994300	0.596437	0.443148	183.742	300.805
								Chr2	11045700	11046000	0.628803	0.451626	49.2933	88.95
								Chr3	18545100	18545700	0.47471	0.452151	710.357	1033.62
								Chr4	18256200	18256500	0.512307	0.472153	6436.52	9811.3
								Chr2	11043600	11044200	0.578696	0.480449	167.507	277.475
								Chr5	9115200	9115500	0.692263	0.484822	42.9067	57.805
								Chr1	12742500	12743100	0.549655	0.488685	1632.93	2466.51
								Chr1	5811900	5812200	0.674282	0.490773	39.875	81.98
								Chr3	10749300	10749600	0.578052	0.500024	449.733	856.233
								Chr2	2866500	2866800	0.565584	0.50302	3406.07	6108
								Chr2	4105800	4106100	0.519214	0.505241	1504.18	2322.43
								Chr3	8371800	8372100	0.575347	0.518163	342.94	574.965
								Chr4	12842700	12843000	0.593727	0.518363	1040.86	2103.51
								Chr3	18546000	18546300	0.498346	0.519691	727.793	1193.57
								Chr1	18094800	18095400	0.527518	0.520044	4851.5	7604.66
								Chr5	13154700	13155000	0.551805	0.544991	336.462	555.428
								Chr5	8825400	8825700	0.519022	0.545041	1910.85	2973.64
								Chr5	1811700	1812300	0.468312	0.561482	3355.76	4528.65
								Chr1	4068900	4069200	0.571923	0.562341	240.242	374.44
								Chr2	7184100	7184400	0.395614	0.567044	317.15	313.248
								Chr1	28966200	28966500	0.493827	0.577654	155.953	235.15
								Chr4	13902900	13903200	0.468357	0.588751	5183.61	7626.25
								Chr1	23453700	23454000	0.465624	0.601159	459.17	817.535
								Chr1	18095700	18096000	0.503482	0.605307	1447.63	2438.73
								Chr1	28964700	28965000	0.408861	0.618799	1562.75	2420.84
								Chr2	2864700	2865900	0.490519	0.619289	352.48	602.425
								Chr3	7419900	7420200	0.499694	0.633414	867.057	1328.65
								Chr1	24426600	24427500	0.468844	0.640643	111.742	145.952
								Chr5	3753900	3754200	0.55691	0.643077	71.4517	119.637
								Chr1	12740700	12742200	0.48241	0.643225	500.347	721.043
								Chr4	9087900	9088200	0.544448	0.64331	186.378	305.995
								Chr5	23340000	23340300	0.550813	0.645924	60.1767	99.66
								Chr5	22702800	22703100	0.47565	0.650087	1912.73	2737.57
								Chr1	4618800	4621200	0.47893	0.650821	872.135	1259.28
								Chr3	8510700	8511000	0.423831	0.66139	6008.37	8706.06
								Chr3	20030700	20031300	0.437712	0.675783	11062	15873
								Chr3	22409400	22410000	0.544518	0.680486	107.8	181.53
								Chr1	28965300	28965600	0.419276	0.68972	1072.26	1330.1
								Chr3	8361900	8362200	0.417162	0.697581	76.6717	135.233
								Chr1	7808400	7809300	0.586026	0.705375	3183.99	6361.72
								Chr3	9707400	9707700	0.432527	0.7083	3236.75	5212.77
								Chr1	22252500	22254000	0.530857	0.719392	189.398	254.55
								Chr5	21998100	21998400	0.534972	0.721261	98.8217	195.097
								Chr5	21456000	21456300	0.441451	0.730779	2057.25	3589.59
								Chr2	4108800	4109400	0.430554	0.739448	672.783	901.305
								Chr1	20206500	20206800	-0.460371	0.742779	210.233	142.06
								Chr1	4505100	4505700	0.476825	0.744282	412.53	627.775
								Chr3	14728500	14729100	0.424823	0.748336	387.74	756.395
								Chr2	8403600	8404200	0.457051	0.756162	325.18	440.585
								Chr5	20314500	20314800	0.445333	0.760441	277.438	415.475
								Chr4	2595000	2595300	-0.481384	0.770598	74.5567	79.765
								Chr5	17174700	17175000	0.447472	0.777927	1911.87	3083.38
								Chr1	11139600	11139900	0.498162	0.780245	15.7483	30.915
								Chr1	7075800	7076400	0.408618	0.782225	645.223	1281.49
								Chr5	21456600	21456900	0.422589	0.796636	2265.51	3257.97
								Chr1	24624300	24624600	0.470353	0.80608	159.255	257.9
								Chr3	8265900	8266200	0.508096	0.810392	282.49	565.3
								Chr3	6294900	6295500	0.388166	0.811987	341.413	469.055
								Chr2	1926900	1927800	0.383636	0.8313	2081.33	3598.88
								Chr4	17637300	17638200	0.413413	0.833524	1117.19	1597.75
								Chr1	14276700	14277300	0.394912	0.850938	196.07	272.47
								Chr2	16799100	16799400	0.483748	0.856564	42.37	73.6
								Chr2	10355700	10356600	0.501563	0.858358	4139.63	5974.59
								Chr5	18636000	18637200	0.415995	0.861519	234.242	338.808
								Chr5	6440700	6441000	0.358208	0.875206	132.023	182.43
								Chr2	7185600	7186200	0.372553	0.878231	83.68	106.095
								Chr2	345300	345900	0.421795	0.882157	113.503	165.595
								Chr2	12799800	12800400	0.426186	0.884921	273.267	406.425
								Chr1	8672700	8673000	0.481374	0.886135	20.215	36.5125
								Chr5	20771700	20772000	0.385931	0.886577	595.735	830.365
								Chr3	9713700	9714000	-0.292612	0.887457	26.0533	20.08
								Chr2	7204500	7204800	0.271032	0.898037	376.407	479.332
								Chr1	18906000	18906300	0.349506	0.913117	756.517	1012.63
								Chr1	25035600	25036200	0.417651	0.914147	102.12	150.88
								Chr2	10356900	10357500	0.459749	0.920872	2068.32	3905.06
								Chr2	15850800	15851400	0.336582	0.921048	1451.92	1975.23
								Chr2	9468300	9468600	0.222335	0.922772	39.35	52.265
								Chr3	9708300	9708900	0.357444	0.927152	7782.37	9921.45
								Chr1	10372500	10372800	-0.344728	0.929507	11.2433	5.44
								Chr2	346500	346800	0.417175	0.932715	311.488	516.395
								Chr5	8824200	8824500	0.407336	0.940127	97.66	143.84
								Chr4	6395400	6396300	0.440605	0.940692	12.6467	24.405
								Chr1	13925400	13925700	0.310101	0.940995	443.953	571.515
								Chr2	15850200	15850500	0.437581	0.942101	19.1667	33.425
								Chr2	6631500	6631800	0.124563	0.944974	324.42	440.44
								Chr3	8370900	8371200	0.361858	0.945512	761.177	1541.12
								Chr5	13615800	13616100	0.423798	0.949379	134.583	155.57
								Chr3	9717000	9717300	0.437999	0.949533	924.053	1895.32
								Chr5	10860600	10860900	0.43488	0.953498	334.173	614.32
								Chr4	15695700	15697200	0.283772	0.962016	1215	1625.82
								Chr2	6434100	6434400	0.318358	0.963425	133.965	176.98
								Chr1	4507500	4507800	0.296167	0.963662	64.9883	89.425
								Chr1	5812500	5813100	0.32799	0.971739	563.547	714.445
								Chr3	16595700	16596000	-0.220021	0.974442	60.2517	47.2525
								Chr1	22255200	22256400	0.375973	0.977751	149.517	175.64
								Chr2	9470700	9471000	0.247628	0.995058	169.498	205.985
								Chr1	7810200	7810500	0.387727	0.995867	1293.91	2278.39
								Chr4	9048900	9049200	0.199227	0.997925	675.49	846.99
								Chr3	17425500	17425800	0.118781	0.999562	19.73	23.06
								Chr5	13804200	13804500	0.353784	0.999966	75.67	110.88
								Chr1	1593000	1593300	0.103383	0.999983	441.74	534.815
								Chr1	4312200	4312500	-0.103529	0.999983	13.445	10.315
								Chr1	4993200	4993500	0.153987	0.999983	83.6433	82.92
								Chr1	5970600	5970900	0.114405	0.999983	647.4	716.31
								Chr1	6946800	6947100	0.34173	0.999983	75.66	136.615
								Chr1	7809600	7809900	0.237431	0.999983	64.25	80.265
								Chr1	8673600	8674500	0.171516	0.999983	69.5467	67.37
								Chr1	9956100	9956400	0.14846	0.999983	420.67	521.138
								Chr1	9958500	9959100	0.298073	0.999983	593.923	683.01
								Chr1	10197000	10197300	-0.002791	0.999983	98.29	91.17
								Chr1	12743400	12743700	0.158893	0.999983	45.96	52.465
								Chr1	13896000	13896300	-0.0449545	0.999983	50.68	49.53
								Chr1	17071800	17072100	0.0575528	0.999983	156.85	156.94
								Chr1	17335500	17335800	0.114276	0.999983	88.4383	95.3375
								Chr1	18092700	18093600	0.293687	0.999983	287.947	374.145
								Chr1	18955800	18956100	0.134614	0.999983	60.3267	67.14
								Chr1	19578000	19578300	0.185386	0.999983	171.153	191.26
								Chr1	20565000	20565300	-0.114287	0.999983	39.8833	35.8575
								Chr1	22408800	22409100	0.184662	0.999983	28.83	34.16
								Chr1	24723600	24723900	-0.130687	0.999983	10.9733	17.29
								Chr1	25349400	25349700	0.326187	0.999983	549.007	944.565
								Chr1	25357500	25357800	0.153938	0.999983	101.713	110.47
								Chr1	25358400	25358700	0.134526	0.999983	343.127	410.11
								Chr1	30167700	30168000	0.184367	0.999983	1629.29	2112.45
								Chr1	30168600	30168900	0.270612	0.999983	452.86	540.29
								Chr2	5057700	5058000	-0.019924	0.999983	244.89	243.065
								Chr2	6431400	6432000	0.150501	0.999983	862.787	1172.41
								Chr2	6632100	6632400	0.264898	0.999983	1271.63	1803.3
								Chr2	6633600	6634200	0.185876	0.999983	347.403	407.55
								Chr2	6646800	6647100	0.245022	0.999983	758.347	1060.88
								Chr2	8872800	8873100	-0.0574876	0.999983	85.2733	77.965
								Chr2	8874900	8875200	0.169436	0.999983	339.077	398.712
								Chr2	8876400	8876700	0.128279	0.999983	362.357	418.065
								Chr2	9469200	9469500	0.290335	0.999983	1059.31	1689.1
								Chr2	11386800	11387100	0.318361	0.999983	101.257	121.685
								Chr2	12799200	12799500	0.12168	0.999983	557.61	681.815
								Chr2	15574500	15574800	0.0581906	0.999983	1236.27	1292.38
								Chr2	15843900	15844500	0.124313	0.999983	156.053	195.22
								Chr2	16031700	16032300	0.0529564	0.999983	198.74	220.72
								Chr3	3542400	3542700	-0.00321451	0.999983	114.37	108.065
								Chr3	7421100	7422000	0.232744	0.999983	147.083	168.335
								Chr3	9217800	9218100	0.18186	0.999983	15.5733	23.57
								Chr3	9715500	9715800	0.138258	0.999983	216.25	244.58
								Chr3	9736800	9737100	0.0470876	0.999983	29.9633	31.35
								Chr3	10947300	10947600	0.272587	0.999983	446.933	572.645
								Chr4	5466000	5466300	0.2132	0.999983	6.72333	10.51
								Chr4	6031800	6032100	0.149463	0.999983	274.88	280.335
								Chr4	7063800	7064100	-0.0741032	0.999983	12.7633	11.675
								Chr4	8947800	8948400	0.320552	0.999983	152.953	202.01
								Chr4	9162900	9163800	0.184317	0.999983	220.347	311.015
								Chr4	10299600	10299900	0.252383	0.999983	59.91	74.4575
								Chr4	10796100	10796400	-0.315416	0.999983	16.085	10.14
								Chr4	12435000	12435300	0.200178	0.999983	686.913	1165.08
								Chr5	382200	382500	0.305563	0.999983	26.9667	42.715
								Chr5	3461700	3462000	-0.0388323	0.999983	22.4733	21.0075
								Chr5	4842600	4842900	0.0699439	0.999983	35.9367	34.865
								Chr5	7655100	7655400	-0.0765222	0.999983	36.03	33.625
								Chr5	8337900	8338200	0.176546	0.999983	6.63167	9.18
								Chr5	8824800	8825100	0.329377	0.999983	74.89	103.04
								Chr5	8826000	8826300	0.167348	0.999983	281.43	323.31
								Chr5	8826600	8826900	0.163164	0.999983	852.197	1143.18
								Chr5	12522900	12523200	0.0593186	0.999983	50.5583	52.325
								Chr5	13162200	13162500	-0.267111	0.999983	44.5867	26.255
								Chr5	15340800	15341100	0.340306	0.999983	75.38	180.375
								Chr5	15463800	15464100	-0.240286	0.999983	12.885	8.6325
								Chr5	21839400	21839700	-0.0580946	0.999983	9.66667	8.6375
								Chr5	21906300	21907200	0.270577	0.999983	76.41	98.98
								Chr5	21999000	21999300	0.371618	0.999983	600.307	1026.63
								Chr5	22020600	22020900	0.184126	0.999983	632.78	843.485
								Chr5	23323200	23323500	0.209812	0.999983	74.5933	93.815

## Sheet: Fig 2F
Fig 2F: Loss of paternal NRPD1 has a relatively minor impact on paternally-biased ISRs
Significant								Not Significant
Chromosome	start	stop	(Log2(pat nrpd1+/-/WT))	padj	average WT	average pat nrpd1+/-		Chromosome	start	stop	(Log2(pat nrpd1+/-/WT))	padj	average WT	average pat nrpd1+/-
Chr3	18070200	18070500	-2.74047	3.6578e-20	243.4	11.595		Chr2	2538600	2538900	-0.786836	0.0507935	1861.32	1525.26
Chr2	904200	904500	-2.51127	3.50886e-19	365.443	31.1		Chr4	8264700	8265600	-0.778332	0.0552304	649.193	405.645
Chr5	16178100	16178700	-2.18351	4.25364e-15	224.67	40.915		Chr3	14306100	14306700	-0.662514	0.0630362	1010.26	601.7
Chr4	2257500	2257800	-2.0902	3.62213e-14	328.92	61.5875		Chr5	15120900	15121200	-1.17618	0.0665643	33.51	6.195
Chr4	4844400	4844700	-2.06628	2.83213e-12	333.143	56.675		Chr5	10713600	10713900	-0.858481	0.0720906	111.8	54.08
Chr4	1287900	1291800	-1.71201	8.22543e-11	573.192	143.39		Chr5	9704700	9705000	-1.01118	0.0753753	41.4883	12.41
Chr3	15736500	15736800	-2.05997	1.16244e-10	202.762	33.2325		Chr3	13482000	13482300	-0.925502	0.0759263	54.3333	30.455
Chr4	1438800	1439100	-1.45367	5.17039e-08	404.553	119.09		Chr3	10984800	10985100	-0.863314	0.0827952	170.85	73.68
Chr2	5589900	5590200	-1.43151	2.69016e-07	1087.16	349.092		Chr2	6813000	6813300	-0.745599	0.0868129	245.177	182.305
Chr2	1912500	1912800	-1.42332	3.31885e-07	309.503	95.4975		Chr2	1485000	1485300	-0.97203	0.0876534	26.8567	4.885
Chr2	2218800	2219100	-1.24096	3.63183e-07	2223.79	840.62		Chr4	1780500	1780800	-0.972753	0.09288	35.9217	10.9
Chr2	13160400	13160700	-2.08205	4.09195e-07	66.4067	7.115		Chr3	11373000	11373300	-0.79125	0.0933237	131.937	69.735
Chr3	12240300	12241200	-1.45583	3.49089e-06	345.653	90.17		Chr1	13147500	13148100	-0.964921	0.0942527	43.5933	11.63
Chr2	6736200	6737100	-1.55847	5.61394e-06	124.858	23.6575		Chr3	12641100	12641700	0.642946	0.106525	731.22	1367.13
Chr1	13249800	13250100	-1.58245	1.05813e-05	109.163	23.68		Chr2	4302000	4302300	-0.690336	0.106527	424.643	230.695
Chr5	13495200	13495800	-1.3858	2.67862e-05	86.7233	12.01		Chr3	8758500	8758800	-0.737573	0.107167	184.61	100.31
Chr2	5590800	5591700	-1.20104	6.53942e-05	719.235	249.298		Chr5	19733400	19734000	0.721651	0.111188	83.8217	158.6
Chr2	5588700	5589600	-1.15917	0.000102176	1234.88	294.31		Chr5	6302100	6302400	-1.41722	0.114126	105.962	14.825
Chr5	20698800	20699100	-1.57806	0.000119152	60.04	9.4		Chr1	20686500	20686800	-0.791902	0.115948	213.593	115.275
Chr5	7554000	7554600	-1.1355	0.000266636	355.413	139.005		Chr5	7377900	7378200	0.92474	0.116566	57.1317	126.312
Chr4	865500	865800	-1.562	0.000291151	125.895	27.1775		Chr1	17197500	17197800	-0.936099	0.118929	86.2617	35.4875
Chr2	10687200	10687500	-1.58493	0.000375525	86.5667	8.61		Chr3	11898000	11898300	-1.04092	0.119451	42.8283	13.335
Chr5	10291500	10291800	-1.72072	0.000463387	202.595	44.765		Chr1	25245300	25245600	-1.014	0.124032	37.5617	9.375
Chr4	4845000	4845300	-1.13725	0.000601873	208.053	75.465		Chr3	15958200	15958500	-1.01046	0.124604	35.74	9.975
Chr4	6017100	6017400	-1.55241	0.000708931	42.4983	3.735		Chr5	13496100	13497900	-0.664008	0.127993	264.047	155.805
Chr3	12238200	12238800	-1.3185	0.000787956	183.173	48.785		Chr3	1674600	1674900	-0.943578	0.129116	27.2867	5.9875
Chr4	10648800	10649100	-1.50468	0.000821005	80.0267	39.785		Chr2	2730600	2731500	-0.989468	0.132502	50.76	17.275
Chr5	13581000	13581300	1.18151	0.00104286	49.2533	138.895		Chr5	13512000	13512600	-0.891087	0.132817	74.99	44.98
Chr4	2434200	2434500	1.3154	0.00118849	31.3033	111.895		Chr4	1755900	1756200	0.812175	0.135194	64.3633	133.665
Chr2	6544200	6544500	-1.35327	0.00158438	84.0833	25.07		Chr1	16068000	16068300	-0.934553	0.136154	26.8	6.75
Chr2	6738600	6739200	-1.0256	0.00158438	246.7	96.08		Chr3	11225700	11226000	-0.579114	0.140029	2372.83	1496.26
Chr5	14820600	14820900	-1.34117	0.00177542	74.2667	14.265		Chr1	26993700	26994000	-0.969829	0.141035	20.7983	1.315
Chr5	10798500	10799100	-0.951252	0.0017905	159.473	72.42		Chr2	8529000	8529300	0.763516	0.153521	61.7233	124.78
Chr5	17290500	17290800	-1.38395	0.00254454	39.87	6.005		Chr3	14298000	14298300	-0.578608	0.156533	815.043	574.48
Chr3	14308200	14308500	-1.25039	0.00256852	241.56	80.5675		Chr1	7851900	7852200	-0.917399	0.158727	32.7567	9.195
Chr3	11106300	11106600	-1.34201	0.00364094	43.5367	7.125		Chr5	13493100	13494000	-0.688095	0.162133	223.63	123.43
Chr2	7440600	7440900	-0.96038	0.00366652	224.633	87.855		Chr1	16558800	16559100	-0.854205	0.166398	104.763	25.51
Chr3	14233500	14233800	-1.08253	0.00403322	358.62	148.995		Chr3	14765100	14765700	-0.874663	0.172227	66.6067	29.31
Chr3	15082800	15083100	0.840098	0.00455145	356.663	687.205		Chr4	5561400	5561700	-0.658373	0.172227	467.977	289.88
Chr2	12181200	12181800	-1.10925	0.00539149	88.245	28.5		Chr4	2049900	2051400	-0.72562	0.172248	424.28	296.533
Chr2	6953100	6953700	-1.02395	0.0058413	163.077	76.505		Chr4	1292100	1292400	-1.53035	0.173126	115.648	15.375
Chr5	13691400	13692600	-0.909916	0.00611967	386.42	175.485		Chr5	13974000	13974300	-0.832924	0.175748	117.05	55.55
Chr2	1092900	1093200	-1.62044	0.0100455	75.13	13.7		Chr1	16866600	16866900	-0.855488	0.177572	49.345	19.155
Chr2	12136500	12137100	-1.17158	0.010159	62.5517	18.81		Chr4	17044500	17044800	-0.820264	0.179225	63.3317	27.7775
Chr3	10719300	10719900	-0.94072	0.0112739	175.273	81.425		Chr2	7145700	7146000	-0.7672	0.201579	176.075	84.7425
Chr3	14992500	14992800	0.848151	0.0117545	246.97	490.597		Chr1	26952900	26953200	-0.841021	0.212145	25.5633	5.615
Chr2	4799100	4799400	-1.26008	0.0121037	75.6333	20.265		Chr1	13865700	13866900	-0.649991	0.214142	601.853	384.41
Chr1	13248300	13248900	-0.86537	0.0134693	716.313	354.82		Chr1	19072800	19073100	-0.854646	0.220369	23.3117	6.1875
Chr1	13106700	13107000	-1.17412	0.0135764	66.0717	21.7925		Chr3	16267500	16267800	-0.848589	0.220557	22.5517	5.6325
Chr3	17060400	17060700	-1.00578	0.0142533	113.513	47.315		Chr3	11185200	11187900	-0.592804	0.220602	329.69	200.945
Chr4	1659600	1659900	-1.03829	0.0145881	237.877	128.75		Chr2	4033500	4033800	-0.681368	0.222364	162.66	93.685
Chr1	18885900	18886200	-1.20625	0.0157403	33.1567	6.005		Chr1	13242300	13246800	-0.563052	0.230714	442.043	321.15
Chr5	13560300	13560600	-1.06946	0.0163976	88.0917	31.935		Chr5	11028900	11029200	-0.902272	0.232927	107.865	42.165
Chr5	22391700	22392000	0.78981	0.0183927	321.45	604.85		Chr4	6102900	6103200	-0.887769	0.235279	41.34	14.6625
Chr4	8263200	8263800	-0.812112	0.0185045	719.293	453.63		Chr5	112800	113100	-0.820795	0.241977	90.07	34.525
Chr1	16593900	16595400	-0.844691	0.0198387	614.573	261.165		Chr1	18089700	18090000	-0.890163	0.242518	50.4517	18.1825
Chr5	10554900	10555200	-1.42298	0.0205329	80.0217	19.4975		Chr5	10290600	10290900	-0.727188	0.243504	126.497	132.59
Chr3	12573000	12573300	-0.140408	0.0209071	61.2767	53.31		Chr2	2321100	2321700	-0.680555	0.245763	111.303	60.78
Chr3	11483100	11483700	-0.918001	0.0240505	156.68	93.04		Chr3	11751300	11751600	-0.733954	0.248031	123.953	62.77
Chr2	2541300	2542200	-0.7844	0.0243476	894.363	471.79		Chr2	1340700	1341000	-0.941396	0.252499	39.005	10.505
Chr3	15737100	15738000	-0.954418	0.0278648	65.4567	42.815		Chr3	12458400	12458700	0.573137	0.257923	208.57	329.49
Chr2	2538000	2538300	-0.862497	0.0315033	891.51	484.465		Chr3	10977300	10977900	-0.798709	0.261068	52.49	23.1225
Chr1	13247400	13248000	-0.761419	0.0326463	994.23	559.02		Chr2	4772100	4772700	0.582178	0.262514	215.57	347.865
Chr5	10772400	10773000	-0.979699	0.0354347	200.96	101.88		Chr2	8643900	8644200	-0.776456	0.263357	56.8667	24.355
Chr2	4262400	4263000	-1.08008	0.0360569	174.147	25.9		Chr5	20519700	20520000	-0.898342	0.264585	122.41	45.055
Chr5	21699900	21700200	-1.04463	0.036535	59.26	19.115		Chr4	8266200	8267400	-0.707779	0.275464	149.465	78.81
Chr2	4622700	4623300	0.89387	0.0375783	115.41	252.48		Chr2	4997100	4997400	0.627947	0.283279	207.957	357.425
Chr5	13659000	13659300	-0.964256	0.0381941	83.2133	36.08		Chr3	22076400	22076700	0.717214	0.283496	43.8633	88.705
Chr5	16914600	16914900	-1.09199	0.0383718	53.8733	13.51		Chr1	16604100	16606200	-0.512566	0.285707	768.053	563.105
Chr1	16863000	16863300	-1.03205	0.0413568	90.8733	34.56		Chr1	13104600	13104900	-0.613133	0.2912	206.027	110.55
Chr5	17106900	17107200	-1.13784	0.043866	35.075	7.8925		Chr4	3521700	3522300	0.684448	0.293853	63.5767	108.86
Chr2	2021700	2022000	1.02854	0.0451713	31.585	83.175		Chr2	11400000	11400900	-0.958257	0.297409	87.175	30.015
Chr1	16612200	16613400	-0.878741	0.0453708	447.958	161.965		Chr3	15957300	15957900	-0.786033	0.299393	27.9667	9.015
								Chr5	12076200	12076500	-0.595331	0.300308	175.647	138.725
								Chr3	13531800	13532400	0.665637	0.301493	77.1167	135.875
								Chr1	13865100	13865400	-0.589093	0.302973	496.155	313.908
								Chr2	8175000	8175300	-0.728478	0.309405	48.6367	21.005
								Chr1	12071400	12071700	0.65566	0.309642	65.47	115.43
								Chr4	5698500	5699400	-0.647789	0.309745	45.34	44.28
								Chr3	14973300	14973600	0.681738	0.311079	55.3183	103.683
								Chr3	15943500	15944100	-0.603711	0.32651	186.01	109.575
								Chr2	3930900	3932400	0.543974	0.332688	200.693	301.54
								Chr2	4348800	4350000	-0.581374	0.338971	381.68	204.77
								Chr1	21211500	21211800	-0.762775	0.339481	27.655	9.3725
								Chr2	5160300	5160600	0.665076	0.340748	181.622	295.26
								Chr3	17928300	17928900	-0.66844	0.345925	169.185	85.355
								Chr4	1595100	1595700	-0.601022	0.346993	278.937	299.485
								Chr1	24146400	24146700	-0.741488	0.349037	19.1867	4.8825
								Chr4	3893100	3893400	-0.628387	0.349318	132.18	76.96
								Chr1	13874700	13877100	-0.555225	0.349419	218.08	127.513
								Chr4	5518800	5519100	0.537124	0.352531	135.907	229.085
								Chr1	13353300	13353600	0.72454	0.355991	32.7633	67.72
								Chr1	16249500	16249800	0.520827	0.363713	376.157	566.99
								Chr5	15052800	15053100	-0.737273	0.366685	17.65	4.495
								Chr5	9346500	9347100	-0.541806	0.367955	519.977	337.53
								Chr1	16355700	16356300	0.471044	0.368148	4677.42	6742.89
								Chr4	3802800	3804900	0.599783	0.370246	123.183	211.183
								Chr3	11508600	11509500	0.533454	0.370401	75.075	111.595
								Chr5	9697500	9697800	-0.090767	0.370997	57.44	43.0275
								Chr4	6563700	6564000	-0.958016	0.376739	47.7067	13.675
								Chr3	11898600	11898900	-0.697816	0.38305	55.6033	27.375
								Chr3	15735000	15735900	-0.526389	0.38337	433.477	248.985
								Chr1	12734400	12735000	0.155495	0.386216	105.553	120.88
								Chr2	2607600	2608800	0.453659	0.386652	517.043	810.013
								Chr3	12670200	12670500	-0.448475	0.387606	716.363	476.44
								Chr2	6001500	6001800	0.648221	0.395498	96.8917	170.278
								Chr4	7762500	7762800	-0.639984	0.395786	90.3517	51.6025
								Chr5	10235700	10236900	-0.530891	0.397114	218.823	156.785
								Chr2	10160100	10160400	0.687976	0.397385	71.53	120.177
								Chr4	3528000	3528300	0.506958	0.397535	465.647	685.765
								Chr4	8796300	8796600	0.866252	0.397538	14.9083	46.37
								Chr1	16250100	16251000	0.508349	0.400275	341.463	512.79
								Chr5	10706100	10706400	-0.637609	0.408617	163.703	90.525
								Chr3	11372400	11372700	-0.605889	0.410071	152.697	88.6
								Chr4	2826300	2826600	0.450008	0.410605	943.132	1338.75
								Chr5	22356600	22356900	-0.706126	0.410984	30.355	11.46
								Chr4	9675600	9676200	-0.768521	0.411234	51.3633	16.885
								Chr1	16611600	16611900	-0.592761	0.417583	382.273	270.425
								Chr2	1939500	1940100	-0.706258	0.419716	41.7617	17.4725
								Chr2	5404800	5406600	-0.467088	0.420111	230.197	251.42
								Chr5	14157000	14157300	0.468378	0.422742	748.613	1081.83
								Chr3	14303700	14305200	-0.572724	0.427302	306.158	205.202
								Chr4	4640700	4641000	0.607899	0.433576	119.497	215.007
								Chr2	3784500	3784800	0.573094	0.435331	90.2367	149.157
								Chr2	11787000	11787300	-0.579467	0.439676	97.6133	69.87
								Chr2	266100	266400	0.577952	0.440605	89.3767	149.558
								Chr2	1943700	1944000	0.657138	0.445556	117.5	239.52
								Chr1	18164100	18164400	-0.983504	0.44978	99.3333	43.68
								Chr3	17860500	17860800	0.638994	0.450881	41.1033	76.04
								Chr5	20296200	20296500	-0.664543	0.453907	53.495	27.3775
								Chr4	12095400	12095700	-0.696651	0.459475	18.6367	5.625
								Chr2	8183100	8183400	0.709908	0.459684	10.285	27.62
								Chr2	4307700	4308900	-0.681446	0.460023	55.71	24.0175
								Chr5	9686100	9686400	-0.682909	0.463904	32.83	14.825
								Chr4	3805800	3806100	0.482759	0.469548	381.807	603.875
								Chr1	13998900	13999500	-0.633277	0.470257	120.787	63.895
								Chr4	2165700	2166300	0.564647	0.474662	77.5	126.155
								Chr1	16280400	16280700	0.514895	0.475643	120.503	184.35
								Chr3	21130500	21131100	-0.567773	0.477795	135.45	83.435
								Chr2	11163900	11164500	-0.686184	0.477858	52.4	27.08
								Chr3	16070700	16071000	-0.744963	0.486965	75.03	31.01
								Chr2	5215200	5215500	-0.677934	0.487723	73.4133	28.555
								Chr4	486000	486600	0.605375	0.490021	49.145	94.885
								Chr1	25453200	25453500	-0.820086	0.490338	54.2483	28.9175
								Chr2	3174300	3174600	0.546771	0.492154	112.483	172.442
								Chr1	12435000	12435300	-0.572891	0.495725	103.463	49.54
								Chr4	1586400	1586700	0.58088	0.495725	55.92	99.87
								Chr1	20926200	20926500	-0.649008	0.497184	44.8367	18.385
								Chr4	2685900	2686200	-0.648597	0.499135	32.08	15.79
								Chr1	11006100	11006400	-1.02305	0.499993	76.6733	24.1775
								Chr4	2258400	2258700	0.474363	0.500172	385.02	588.94
								Chr2	10842000	10842300	-0.682468	0.50427	34.5333	17.25
								Chr4	6482100	6482400	-0.590369	0.506768	123.248	75.395
								Chr2	3563700	3564000	0.677986	0.506818	24.87	49.0125
								Chr2	2456400	2456700	-0.667659	0.507328	43.9767	18.41
								Chr5	15992100	15992400	-0.671151	0.507394	78.9783	42.8375
								Chr4	9173700	9174000	-0.673316	0.511471	22.435	6.185
								Chr3	10262700	10263000	-0.36848	0.512354	220.523	158.957
								Chr1	12013200	12013500	0.609336	0.513923	62.1733	114.265
								Chr1	16614300	16614600	-0.635556	0.517097	87.16	61.495
								Chr2	6372000	6372300	0.536345	0.521387	124.893	204.92
								Chr2	1468500	1468800	-0.390732	0.522724	73.4067	52.5825
								Chr1	12548100	12548400	-0.654238	0.523753	41.5817	20.0925
								Chr1	16669800	16670400	-0.593665	0.52732	17.3283	5.0775
								Chr4	5359200	5359500	-0.153051	0.529277	32.76	26.705
								Chr2	11053200	11053800	-0.65204	0.53015	37.1767	17.285
								Chr4	1890300	1890600	-0.652789	0.530573	40.5433	18.37
								Chr1	4094400	4094700	-0.455404	0.533881	265.437	276.342
								Chr3	15627900	15628200	0.461058	0.533973	198.173	284.25
								Chr2	4767900	4768200	0.476136	0.539677	249.098	371.015
								Chr5	13096500	13096800	-0.437885	0.543253	412.738	290.398
								Chr1	6777900	6778200	-0.605838	0.544821	11.5683	2.2525
								Chr2	5164500	5164800	0.43833	0.545	141.21	177.065
								Chr5	15326400	15326700	-0.441524	0.549349	39.0033	21.4175
								Chr2	7147500	7148100	-0.541441	0.550895	118.293	73.235
								Chr4	1657500	1658400	-0.48563	0.553091	287.187	159.48
								Chr4	1961100	1961700	-0.486691	0.553336	172.107	113.84
								Chr4	6748500	6748800	0.56026	0.553674	30.9433	63.6825
								Chr2	10728600	10729200	-0.621212	0.553813	51.065	28.18
								Chr1	12930300	12930600	-0.095896	0.555346	590.863	472.585
								Chr5	10757100	10757400	0.450304	0.556129	455.535	653.445
								Chr4	3810900	3811200	0.451493	0.559176	249.197	366.168
								Chr4	11148900	11149200	0.476288	0.562091	135.625	201.015
								Chr2	2961900	2962200	-0.601862	0.563237	66.4483	34.9275
								Chr2	4145700	4146300	-0.443134	0.565235	346.03	215.855
								Chr5	10919700	10920000	-0.556415	0.566717	96.915	58.565
								Chr4	13336500	13336800	0.552736	0.567275	57.7983	96.2925
								Chr5	16015500	16015800	-0.422442	0.56864	306.08	205.428
								Chr4	4795800	4796100	0.572281	0.569367	50.0167	89.035
								Chr1	18021000	18021600	-0.622286	0.569592	43.3167	24.9775
								Chr4	237300	237600	0.465073	0.570707	191.402	281.735
								Chr5	10117500	10117800	-0.431436	0.571445	404.14	286.752
								Chr5	13467000	13467300	0.633259	0.572708	66.4933	70.56
								Chr1	16606500	16607700	-0.45209	0.574582	310.752	310.278
								Chr4	2269500	2269800	0.490461	0.579001	114.058	170.885
								Chr2	1602300	1602600	0.442986	0.580778	249.932	349.577
								Chr5	5792100	5792400	0.548556	0.582711	57.8417	94.23
								Chr5	9344700	9345000	-0.456935	0.586846	439.35	311.202
								Chr1	11366700	11367000	-0.395254	0.587271	87.245	64.425
								Chr5	10529100	10529700	-0.445747	0.58927	586.043	409.425
								Chr3	11371500	11372100	-0.4711	0.591116	211.68	142.13
								Chr3	18725700	18726000	-0.441252	0.591239	41.5233	25.145
								Chr3	14307000	14307900	-0.48801	0.594548	196.148	132.94
								Chr5	13518300	13518900	-0.446459	0.594942	697.817	472.475
								Chr3	15449700	15450000	-0.591882	0.597608	56.3583	30.79
								Chr1	12923400	12924300	0.607783	0.598245	33.0033	58.56
								Chr2	10413300	10413600	0.450739	0.598755	209.505	299.57
								Chr3	12137100	12137400	0.493212	0.599015	379.108	566.638
								Chr4	1192800	1193100	-0.573469	0.599507	69.0783	40.41
								Chr1	13070700	13071000	-0.617098	0.604341	50.7667	24.825
								Chr2	5431500	5431800	0.397601	0.606715	137.153	203.887
								Chr2	4648500	4649100	0.484163	0.606751	179.347	262.67
								Chr3	13988700	13989000	0.542346	0.60689	53	87.6975
								Chr3	9702600	9702900	0.149234	0.61037	146.54	241.007
								Chr5	13491300	13491600	-0.409154	0.611595	168.093	124.797
								Chr3	15089400	15089700	0.527446	0.61227	99.2433	159.305
								Chr1	13762500	13762800	0.503409	0.612308	82.1217	127.032
								Chr3	15084900	15085200	0.398357	0.612869	733.962	1001.42
								Chr2	6544800	6545700	-0.578465	0.613328	80.86	65.375
								Chr2	11076300	11076600	-0.49171	0.613994	28.505	15.5925
								Chr4	4143900	4144200	-0.424667	0.616251	83.1733	50.61
								Chr2	3012600	3012900	0.166688	0.616325	136.23	149.815
								Chr2	2666400	2667000	0.56405	0.617092	40.5033	75.085
								Chr5	21621000	21621300	-0.59702	0.617347	40.4967	13.13
								Chr1	25973400	25973700	-0.582035	0.618992	12.64	6.395
								Chr4	7520100	7521000	-0.498503	0.620465	117.237	71.69
								Chr5	26161500	26161800	-0.593962	0.6216	26.2367	12.785
								Chr1	13862400	13863000	-0.446086	0.623684	407.02	315.745
								Chr2	5836500	5836800	0.448177	0.624962	100.412	158.485
								Chr2	1422600	1423200	0.508192	0.626433	77.74	122.295
								Chr2	5504400	5504700	0.582464	0.626691	25.5967	55.255
								Chr2	4656900	4657500	0.486327	0.627807	144.14	235.34
								Chr3	16356900	16357200	-0.370111	0.628105	218.173	148.13
								Chr2	5400000	5400600	-0.527366	0.630615	93.1467	57.85
								Chr1	20927100	20927400	-0.589485	0.631042	60.6383	31.4675
								Chr3	9576300	9576600	0.415298	0.640162	41.4633	67.6425
								Chr2	2283900	2284200	-0.294313	0.640249	110.592	66.1425
								Chr4	2117700	2118000	0.320542	0.640249	36.585	62.9325
								Chr4	1593900	1594200	0.265848	0.641632	348.708	449.627
								Chr3	22539000	22539300	0.527977	0.642324	42.0167	78.56
								Chr3	12625200	12625500	0.545115	0.642501	46.1167	83.325
								Chr5	14594400	14594700	-0.57139	0.645651	52.5833	20.27
								Chr4	5408400	5408700	-0.604875	0.646561	20.05	9.39
								Chr2	4331700	4332600	-0.521051	0.64658	165.887	119.83
								Chr2	10410900	10411500	0.471053	0.64658	112.427	171.595
								Chr5	12095100	12095400	0.454506	0.647787	147.478	214.683
								Chr5	10761900	10762800	0.399621	0.649358	1175.97	1675.47
								Chr2	6196500	6196800	0.413647	0.654377	70.705	108.028
								Chr4	1782900	1783500	-0.600968	0.655258	20.7533	9.755
								Chr2	2886300	2886600	0.49504	0.656911	72.49	106.127
								Chr1	13870800	13873500	-0.49062	0.657126	88.4067	62.675
								Chr3	16241700	16242000	-0.530183	0.660081	228.64	161.875
								Chr5	14656200	14656800	-0.493756	0.665799	102.917	66.395
								Chr2	13879500	13879800	-0.547145	0.665969	59.085	35.3
								Chr3	11184600	11184900	0.143545	0.6685	247.733	370.34
								Chr1	13998300	13998600	0.170161	0.668604	64.6617	77.72
								Chr3	17503200	17503500	-0.584488	0.669154	37.1167	18.3975
								Chr4	5475900	5476500	0.387923	0.671437	508.777	678.16
								Chr2	10650300	10650600	0.526703	0.672516	42.41	64.0025
								Chr1	10512600	10512900	0.467806	0.672909	105.22	159.702
								Chr4	10189200	10189500	0.387391	0.673343	152.86	228.645
								Chr1	13239600	13239900	-0.360659	0.675355	537.983	418.545
								Chr2	899100	899400	-0.394512	0.675677	506.885	358.615
								Chr3	15561600	15562200	0.430623	0.680442	138.1	196.245
								Chr2	7440000	7440300	-0.473294	0.681622	83.8067	68.805
								Chr5	11037600	11037900	-0.101423	0.683006	185.497	185.7
								Chr5	16109700	16110000	-0.476829	0.683334	114.852	74.2825
								Chr3	12872400	12873000	0.47374	0.685757	99.8367	158.79
								Chr2	5156100	5156400	0.411318	0.686724	227.38	318.65
								Chr4	1661100	1661700	0.368834	0.687428	883.767	1221.48
								Chr3	11182500	11184300	-0.499652	0.688915	448.54	249.645
								Chr3	14950200	14951100	-0.403419	0.689492	443.863	323.342
								Chr1	13869000	13869600	-0.393584	0.690091	666.527	395.605
								Chr4	2235300	2235600	-0.230937	0.691421	126.49	101.502
								Chr1	13309800	13310700	-0.383797	0.691455	282.473	211.743
								Chr5	19832100	19832400	0.534516	0.692265	83.8817	126.575
								Chr5	10653600	10656000	-0.473699	0.692333	116.273	72.08
								Chr1	16548000	16548300	-0.355642	0.692361	48.1983	38.5
								Chr2	4328400	4330200	-0.385002	0.693582	801.547	605.315
								Chr4	18280500	18280800	0.505988	0.693794	42.7467	66.395
								Chr2	6494100	6497100	-0.471781	0.694753	653.41	223.835
								Chr1	13477500	13477800	-0.33662	0.695848	70.47	61.05
								Chr3	11892000	11892600	-0.419706	0.699256	39.1667	21.03
								Chr5	13893300	13893600	-0.486171	0.699368	20.66	9.0075
								Chr1	8573400	8573700	-0.511867	0.699686	117.377	73.36
								Chr4	8109300	8109600	0.547667	0.699751	39.4983	70.5125
								Chr3	12640500	12640800	0.408213	0.702226	996.597	1406.26
								Chr5	14616600	14617200	-0.530968	0.703573	61.3867	35.62
								Chr3	20929800	20930100	-0.551654	0.705065	19.635	8.2525
								Chr1	13867800	13868700	-0.351263	0.706322	1045.27	710.352
								Chr3	15698700	15699000	-0.421403	0.70679	41.3217	25.9175
								Chr1	13877400	13878600	-0.454287	0.707479	252.573	177.952
								Chr5	22621800	22622100	-0.579191	0.708722	142.297	82.95
								Chr2	10353300	10353600	0.440621	0.71243	85.94	129.142
								Chr5	9939600	9939900	0.412658	0.71369	178.3	251.305
								Chr5	15887700	15888000	0.255767	0.714151	117.398	158.435
								Chr4	185100	185400	-0.203946	0.716064	107.858	111.86
								Chr3	15507300	15507600	-0.454888	0.716268	46.415	27.9875
								Chr1	17414100	17414400	-0.430668	0.716337	35.5417	21.9525
								Chr4	862800	863100	-0.265481	0.71696	93.58	72.03
								Chr5	17221800	17222100	-0.432762	0.717441	207.988	149.415
								Chr1	8621700	8622000	0.425426	0.717529	97.1067	145.673
								Chr5	13693800	13694700	-0.423505	0.719758	255.652	212.623
								Chr2	2536200	2536800	-0.392211	0.719872	578.59	421.11
								Chr1	16259700	16260000	0.349417	0.720086	257.335	357.428
								Chr5	13854900	13855200	-0.450498	0.723908	116.063	92.4675
								Chr3	11781300	11781600	0.39058	0.724145	228.495	312.81
								Chr4	9317700	9318000	-0.335868	0.724468	75.0983	56.5525
								Chr5	24542700	24543000	0.295863	0.724906	228.083	262.837
								Chr1	15647700	15648300	0.443073	0.725907	80.1067	118.97
								Chr3	15624900	15625200	-0.23516	0.727286	118.142	100.89
								Chr4	3807900	3808200	0.466812	0.731389	89.965	135.585
								Chr5	20640300	20640600	-0.195515	0.731539	179.633	121.105
								Chr3	15561000	15561300	0.356971	0.732351	54.1167	88.46
								Chr2	3005100	3005400	0.485808	0.732912	47.3233	73.755
								Chr3	10962300	10962600	0.485077	0.73304	14.83	29.065
								Chr5	10567800	10568400	-0.403394	0.734988	523.81	319.62
								Chr3	12454500	12454800	-0.507105	0.735143	36.01	20.495
								Chr4	6688800	6689100	0.459331	0.737038	66.0967	104.11
								Chr3	14951400	14951700	0.40869	0.737271	227.99	321.37
								Chr5	10120500	10120800	-0.435221	0.738938	197.962	136.632
								Chr4	2724300	2724600	-0.482451	0.741902	76.6533	49.2075
								Chr1	8682000	8682300	-0.456475	0.742452	169.207	116.34
								Chr1	13263600	13263900	0.185819	0.743865	73.5133	90.61
								Chr4	5409300	5409600	-0.515008	0.743946	54.9117	32.8375
								Chr5	6295500	6295800	-0.5345	0.744034	14.2733	5.26
								Chr4	8796900	8797200	0.381838	0.744201	37.2483	57.555
								Chr5	15828000	15828300	0.348701	0.744329	118.295	146.625
								Chr2	1839900	1840800	0.411373	0.744476	344.547	535.995
								Chr1	16600200	16601400	-0.377054	0.749299	694.842	521.17
								Chr2	4650300	4650600	0.239243	0.750077	794.393	966.378
								Chr3	12795300	12795600	-0.450618	0.751099	38.69	22.145
								Chr2	1349100	1349400	-0.486093	0.751128	43.7217	25.1425
								Chr3	15085500	15086400	0.386006	0.75317	879.86	984.56
								Chr2	237900	238200	0.459139	0.75332	70.7067	100.602
								Chr5	12093900	12094200	0.410214	0.755706	42.8017	67.185
								Chr2	16713900	16714200	0.527424	0.758088	26.565	45.3875
								Chr5	9442500	9442800	-0.394669	0.760153	241.05	175.205
								Chr3	14888100	14888400	-0.48506	0.760315	61.255	38.8325
								Chr1	13860600	13860900	-0.493227	0.761859	126.453	79.845
								Chr2	5321100	5322000	0.483406	0.761896	64.4333	90.795
								Chr2	6390300	6390600	0.462023	0.765	53.4233	82.06
								Chr3	11673000	11673600	-0.516159	0.767484	47.9133	22.94
								Chr5	10840500	10840800	0.412008	0.768665	190.973	268.108
								Chr3	4118400	4118700	-0.537464	0.769087	16.24	6.745
								Chr1	21741300	21741600	-0.180129	0.770233	198.272	167.695
								Chr3	10434600	10434900	0.434211	0.770469	79.38	124.135
								Chr1	12633000	12633300	-0.501903	0.772677	52.7633	32.5
								Chr2	4654200	4655400	0.473692	0.773891	77.25	113.983
								Chr3	15740100	15740400	-0.069173	0.774021	107.645	134.303
								Chr5	9912300	9912600	0.505755	0.774355	18.03	33.845
								Chr3	14761800	14762700	-0.297584	0.775151	211.563	141.085
								Chr5	9160800	9161100	-0.531997	0.775434	63.7667	25.91
								Chr1	16650900	16651200	0.306304	0.77608	78.5833	100.175
								Chr2	5588100	5588400	-0.4667	0.776327	44.6633	24.57
								Chr4	3524400	3524700	0.380419	0.779373	226.803	309.77
								Chr4	8189100	8189400	-0.522622	0.779552	15.33	5.81
								Chr1	20524800	20525100	0.387446	0.780733	74.4133	102.5
								Chr2	1597800	1598100	-0.507088	0.78094	15.7333	6.5875
								Chr2	2517300	2517600	-0.287345	0.78244	114.367	87.715
								Chr2	3932700	3935100	0.371458	0.782706	466.793	629.895
								Chr2	4962300	4962600	0.37558	0.782945	677.675	924.275
								Chr3	17059500	17059800	-0.426285	0.783183	141.29	100.735
								Chr2	7363800	7364100	-0.403166	0.78453	221.973	127.45
								Chr4	5928600	5929200	0.0982158	0.786331	53.2133	57.795
								Chr1	16546800	16547100	-0.425515	0.787479	83.21	78.54
								Chr4	2262300	2262900	0.441016	0.788695	28.01	44.365
								Chr1	12466800	12467400	-0.464798	0.789267	58.75	35.655
								Chr2	12410700	12411000	-0.498051	0.790532	40.245	23.2675
								Chr1	16602000	16603800	-0.43974	0.791376	202.56	129.05
								Chr3	14301900	14303100	-0.444317	0.791695	115.872	69.0575
								Chr4	1601700	1602000	0.356993	0.79301	312.265	407.582
								Chr4	3801300	3801900	0.397345	0.793333	156.88	215.355
								Chr1	16863900	16864200	0.478471	0.794295	45.9717	74.0375
								Chr4	8794500	8794800	0.526793	0.794296	6.25667	16.3425
								Chr3	15086700	15088500	0.326386	0.795407	511.713	681.19
								Chr1	11536500	11536800	-0.524228	0.796553	27.165	13.9
								Chr2	5439300	5439600	0.463763	0.796983	50.915	77.8975
								Chr2	2949900	2950200	0.19815	0.797678	519.175	514.477
								Chr2	3158100	3158400	0.331172	0.798191	76.8617	106.875
								Chr5	16857000	16857600	0.435226	0.79848	85.5467	130.8
								Chr3	11227200	11228700	-0.326638	0.799321	936.553	727.025
								Chr2	4334400	4335900	-0.200223	0.800137	595.297	514.425
								Chr5	10212900	10213200	-0.455751	0.800232	37.985	24.6275
								Chr3	17775900	17776500	0.389533	0.800845	62.67	95.045
								Chr5	10700400	10701000	0.37757	0.801793	376.613	515.395
								Chr2	2952300	2952600	0.223276	0.804388	247.182	317.025
								Chr3	11229600	11230800	-0.329448	0.807325	1585.62	932.553
								Chr5	8763900	8764200	-0.455377	0.809627	21.3817	12.2075
								Chr1	16563900	16564200	-0.51391	0.809737	29.4633	16.165
								Chr2	564300	564600	-0.417515	0.810451	32.0367	19.165
								Chr4	2241300	2241600	-0.505435	0.810711	45.9733	26.665
								Chr4	3523500	3523800	0.355121	0.812681	239.305	316.585
								Chr3	20652300	20652600	0.343636	0.812987	168.83	216.458
								Chr5	13418100	13418400	-0.389324	0.813106	205.665	154.2
								Chr2	4764900	4765200	0.29569	0.815112	171.225	227.088
								Chr3	12608700	12609000	0.25542	0.815882	971.64	1172.82
								Chr3	11469900	11470200	-0.434521	0.816389	94.24	60.18
								Chr2	2539800	2541000	-0.373413	0.816407	454.187	303.755
								Chr1	12507000	12507300	0.439638	0.816829	71.0483	107.208
								Chr1	13236900	13237500	-0.311549	0.818884	147.253	136.38
								Chr1	16167300	16167600	0.426658	0.820835	88.655	128.188
								Chr1	14002800	14003100	-0.470416	0.821922	82.01	42.805
								Chr4	10748400	10748700	0.493405	0.822354	43.4167	75.635
								Chr4	2423400	2423700	0.471028	0.822899	65.4467	97.35
								Chr5	9091500	9092100	0.429306	0.823058	72.79	105.86
								Chr3	11086800	11087400	0.0751891	0.824355	127.243	130.76
								Chr2	4545300	4545600	-0.30114	0.82721	122.065	91.1975
								Chr5	12274200	12275100	0.263792	0.827725	226.2	287.783
								Chr5	2688600	2688900	-0.505997	0.827866	28.8933	15.34
								Chr4	2866800	2867100	-0.351359	0.83181	524.653	394.835
								Chr5	15809400	15809700	0.487866	0.83181	36.9	52.59
								Chr5	21225000	21225300	0.488947	0.832023	22.8233	31.95
								Chr3	15027600	15028200	0.403848	0.834242	101.51	144.61
								Chr2	5018100	5018400	0.284066	0.834716	129.438	159.933
								Chr5	16051200	16051500	-0.377059	0.835303	308.06	226.97
								Chr1	22482600	22482900	-0.408629	0.83536	41.5467	27.4475
								Chr4	5929500	5929800	-0.393238	0.83665	75.66	56.1625
								Chr4	2297100	2297400	-0.357948	0.838472	71.5267	49.9175
								Chr3	11309400	11309700	-0.493223	0.839719	31.7333	13.885
								Chr5	13059000	13059300	-0.44081	0.84011	74.71	51.08
								Chr1	17415600	17415900	0.430739	0.840474	44.11	47.3
								Chr5	10121100	10121400	-0.3197	0.840708	142.07	119.282
								Chr2	3748500	3748800	0.311863	0.841539	28.455	38.675
								Chr3	11438700	11439000	-0.293671	0.841565	850.667	696.45
								Chr4	2987700	2988000	-0.33385	0.843607	183.915	148.99
								Chr4	12723300	12723600	0.211279	0.84511	68.6733	96.91
								Chr3	11477400	11477700	-0.39316	0.845517	159.067	115.73
								Chr1	11180400	11180700	0.463487	0.84563	17.9933	31.1625
								Chr2	9161100	9161400	-0.337405	0.846848	64.4633	54.475
								Chr1	15889200	15889500	-0.224109	0.848123	33.76	25.17
								Chr3	6717300	6717600	0.338147	0.849018	273.055	350.055
								Chr1	14043600	14043900	0.402962	0.849339	133.187	192.89
								Chr5	13693200	13693500	-0.373874	0.849339	128.28	89.46
								Chr4	4090500	4091100	0.378127	0.849363	122.167	177.03
								Chr5	12262500	12262800	0.238552	0.849893	58.22	73.9225
								Chr5	10912500	10913100	0.383724	0.849932	90.1733	136.14
								Chr3	11892900	11893200	-0.0280255	0.850124	70.51	84.68
								Chr1	21216000	21216600	0.423171	0.850944	59.12	87.495
								Chr5	10237200	10237800	-0.367517	0.85203	300.923	233.225
								Chr4	3526500	3526800	0.265643	0.853333	185	225.223
								Chr2	11508600	11508900	-0.495816	0.853729	23.3967	13.51
								Chr1	13757700	13758000	-0.371001	0.85435	79.4483	57.87
								Chr1	15971700	15972000	0.452427	0.85442	39.8883	62.305
								Chr4	2410500	2410800	0.22851	0.855417	152.72	159.525
								Chr5	17871000	17871300	0.477799	0.855816	13.1733	24.39
								Chr1	13307700	13308000	-0.140704	0.855891	563.227	474.793
								Chr2	4360200	4360500	-0.486956	0.856397	138.877	68.935
								Chr5	11028000	11028300	-0.309655	0.856728	532.153	318.625
								Chr4	2103300	2103600	0.396496	0.857216	31.3583	48.6625
								Chr1	16008900	16009800	0.390641	0.85838	48.8867	70.205
								Chr5	13063500	13063800	0.408454	0.858681	136.447	182.395
								Chr2	1313100	1313400	0.319497	0.858739	87.9933	120.447
								Chr5	13622700	13623000	0.302288	0.858739	136.52	190.468
								Chr1	19372800	19373100	-0.463796	0.858957	40.5367	22.205
								Chr1	13977600	13977900	0.361541	0.860856	106.177	127.665
								Chr3	15945900	15946200	-0.42748	0.861394	104.755	70.6925
								Chr2	2461200	2461500	0.203557	0.86143	104	118.495
								Chr1	16177200	16177500	0.372316	0.863349	208.58	284.655
								Chr1	21602400	21602700	0.436176	0.863505	61.7833	95.8
								Chr2	4103400	4104000	0.356626	0.865804	164.243	220.705
								Chr1	16010100	16010400	0.242421	0.866479	96.045	130.64
								Chr2	2994900	2995500	0.428849	0.867055	60.3133	85.86
								Chr2	291300	291600	-0.431204	0.867486	17.4433	8.465
								Chr1	13304700	13305000	-0.347629	0.867558	122.155	94.2525
								Chr4	2339400	2340300	-0.347579	0.868528	190.805	134.502
								Chr2	2697900	2698200	0.393555	0.868769	4.60167	10.8825
								Chr5	9938100	9938700	0.435334	0.869057	42.6267	66.575
								Chr3	13238400	13239000	0.326386	0.869616	179.81	241.28
								Chr4	5167800	5168100	0.379247	0.869955	135.747	189.77
								Chr2	6004800	6005400	0.370253	0.873046	481.29	707.86
								Chr2	9197100	9197400	-0.173805	0.873539	415.022	299.822
								Chr2	7202100	7202400	-0.289149	0.873815	119	100.645
								Chr3	12136500	12136800	0.385969	0.873842	158.885	222.847
								Chr5	19640100	19640700	0.409407	0.874162	63.4417	93.74
								Chr5	7728900	7729200	0.377047	0.87424	37.6017	54.795
								Chr4	1854600	1855200	0.459555	0.874651	29.0633	47.72
								Chr4	2724900	2725200	0.254544	0.875844	56.615	68.8425
								Chr2	5609400	5610300	-0.181876	0.876576	308.797	268.515
								Chr3	11181600	11182200	-0.384936	0.876641	327.84	261.485
								Chr5	10821900	10822500	0.34078	0.876641	293.823	384.175
								Chr2	10996500	10996800	-0.178933	0.876881	49.5817	39.6275
								Chr2	11107500	11108100	0.234869	0.878463	125.253	154.38
								Chr3	11775300	11775900	-0.420252	0.879182	74.5667	55.6
								Chr2	3749100	3749400	-0.082731	0.881622	145.18	127.11
								Chr1	13525500	13525800	0.166832	0.881795	213.355	249.127
								Chr2	8019000	8019300	-0.458358	0.882207	28.48	14.985
								Chr2	3778800	3779100	0.394192	0.884633	82.8767	125.805
								Chr2	6888000	6888300	0.370929	0.884718	119.527	163.715
								Chr5	14746500	14746800	-0.146175	0.886011	79.7	69.905
								Chr2	2579400	2579700	0.435303	0.886482	42.35	65.365
								Chr5	13974600	13974900	-0.325032	0.886482	282.28	194.6
								Chr1	12591900	12592200	-0.13758	0.887795	101.913	79.91
								Chr5	16736100	16736700	0.452382	0.888849	26.0133	30.065
								Chr5	10086300	10086600	-0.168571	0.889311	326.717	261.928
								Chr5	13860900	13861200	0.350148	0.889845	69.1	97.695
								Chr4	3768900	3769200	-0.22604	0.890108	2444.31	2081.69
								Chr5	14186700	14187300	0.414382	0.890218	238.457	369.355
								Chr1	13988400	13988700	-0.41228	0.890367	57.45	48.42
								Chr2	1380300	1380600	-0.31739	0.890382	43.1717	34.97
								Chr2	6966600	6969900	0.344999	0.890425	235.527	306.817
								Chr4	2244600	2244900	0.236745	0.890668	100.195	116.373
								Chr2	1279800	1280100	0.392213	0.891235	72.28	105.45
								Chr2	2522700	2524200	0.316105	0.891718	543.467	672.815
								Chr1	14287500	14287800	0.368625	0.892324	106.097	148.412
								Chr1	23883900	23884200	0.356379	0.893182	25.8783	35.625
								Chr1	17008500	17008800	-0.301466	0.8932	24.6033	17.615
								Chr1	17686500	17686800	-0.303731	0.89334	45.8317	37.325
								Chr1	13882200	13882500	0.346242	0.894237	77.89	139.41
								Chr3	11430900	11431200	-0.0922795	0.894432	143.675	131.525
								Chr1	22162800	22163100	-0.0555728	0.894445	54.8433	50.63
								Chr2	2236500	2236800	-0.352647	0.894544	83.1117	62.225
								Chr1	17305800	17306100	0.3544	0.89525	81.41	150.5
								Chr2	3795600	3796800	0.328689	0.896247	295.98	391.49
								Chr3	11485200	11485500	-0.361217	0.897185	148.693	126.13
								Chr2	6372900	6373500	-0.419303	0.89745	67.7233	48.03
								Chr3	10804500	10804800	-0.368536	0.897536	32.2217	21.0325
								Chr1	13055400	13055700	0.419997	0.897592	48.21	72.86
								Chr1	17020500	17020800	-0.343712	0.897858	44.2067	31.5625
								Chr5	14681100	14681400	-0.2511	0.898333	83.5533	80.1875
								Chr2	6307800	6308100	0.468913	0.899271	25.56	37.535
								Chr5	10902600	10902900	0.342966	0.899722	226.77	320.705
								Chr3	16005000	16005600	0.423477	0.899796	25.5133	43.55
								Chr5	14106900	14107200	-0.344805	0.90006	83.5883	65.12
								Chr3	11425200	11425500	0.367738	0.900348	51.43	76.995
								Chr5	10569000	10569300	-0.407289	0.900348	113.06	76.965
								Chr3	15071700	15072000	0.154826	0.901737	47.275	60.495
								Chr2	4768500	4769100	0.337862	0.903364	729.36	950.08
								Chr5	10756200	10756800	0.279631	0.90401	1279.46	1587.02
								Chr5	13680600	13681800	-0.286735	0.904179	622.463	533.745
								Chr1	13910700	13911000	0.18871	0.905476	1136.18	1228.37
								Chr5	16748400	16748700	-0.457402	0.905722	121.183	67.965
								Chr3	15894300	15895200	-0.359033	0.905773	123.79	139.65
								Chr3	9643500	9643800	-0.205063	0.90596	27.3133	24.7825
								Chr2	1464600	1465200	0.398278	0.906603	39.8033	70.615
								Chr4	6812400	6812700	0.401026	0.906603	53.92	78.125
								Chr2	14991600	14991900	0.456168	0.907368	19.3167	33.07
								Chr1	12861900	12862200	0.348813	0.907605	120.057	161.507
								Chr4	3773700	3774300	0.320896	0.907791	454.897	588.605
								Chr2	7680900	7681800	0.414395	0.908695	45.7633	63.08
								Chr5	12660000	12660300	-0.0169846	0.908695	330.297	259.005
								Chr1	22627200	22627500	0.392641	0.909536	26.1433	59.28
								Chr3	17394900	17395200	0.367579	0.909821	161.227	223.423
								Chr2	2689500	2690400	0.435998	0.909947	34.4433	72.055
								Chr1	17104800	17105100	-0.456316	0.91087	26.77	15.4
								Chr4	6880800	6881700	0.349075	0.910965	48.63	65.915
								Chr5	10686300	10686600	0.273577	0.911443	203.648	251.845
								Chr2	4946100	4947600	0.362094	0.912747	196.345	263.27
								Chr3	12793200	12793500	-0.348175	0.913322	262.913	235.225
								Chr5	10776600	10776900	-0.0796277	0.914062	100.533	90.51
								Chr5	7910700	7911000	-0.40433	0.915299	73.735	51.3225
								Chr4	18482100	18482400	0.454465	0.917138	14.025	25.5475
								Chr2	5186700	5187000	-0.11572	0.917485	78.8017	84.61
								Chr4	3427800	3428100	-0.448714	0.917523	44.94	28.555
								Chr4	4083900	4086000	0.0384478	0.918339	68.0867	84.565
								Chr5	10822800	10823100	0.313827	0.918774	490.417	585.43
								Chr4	2049300	2049600	-0.186956	0.91957	231.223	193.403
								Chr2	2537100	2537400	-0.120873	0.920072	428.067	435.857
								Chr1	12282900	12283200	-0.442533	0.920776	32.2917	19.325
								Chr2	2213100	2213700	0.322452	0.920988	274.577	427.42
								Chr3	11426700	11427000	-0.29949	0.921551	242.433	194.472
								Chr4	5123100	5124000	-0.432976	0.922078	113.48	96.78
								Chr2	4751400	4751700	0.346531	0.923001	104.503	139.65
								Chr4	2338500	2338800	-0.0473705	0.924434	66.885	73.6775
								Chr2	6525600	6525900	-0.0080345	0.924624	150.133	166.685
								Chr1	13656300	13656600	0.320813	0.924673	67.8517	89.375
								Chr4	4097100	4097400	0.220022	0.924673	204.855	248.955
								Chr2	6006300	6006600	0.237317	0.925063	175.11	215.483
								Chr4	3299700	3300000	-0.165101	0.925092	58.4683	49.9825
								Chr2	4332900	4333800	-0.303927	0.925151	651.843	666.715
								Chr3	15745200	15745500	-0.312439	0.925359	12.96	7.3125
								Chr1	13731900	13732200	0.231506	0.925382	219.352	269.765
								Chr3	8369700	8370000	0.10824	0.926438	100.352	125.572
								Chr2	2516700	2517000	-0.268485	0.926779	366.082	320.522
								Chr3	12623700	12624000	0.175253	0.926968	46.07	59.34
								Chr4	3513600	3513900	0.263966	0.927152	913.75	1052.8
								Chr1	11861100	11861400	0.294118	0.928805	28.9483	41.8775
								Chr1	7748100	7748400	0.338164	0.928933	44.6033	58.0275
								Chr1	13996500	13996800	-0.330052	0.929171	73.9133	55.4225
								Chr3	15134100	15134400	0.314463	0.929409	237.273	307.362
								Chr1	19718400	19718700	-0.404475	0.929618	60.1767	40.52
								Chr4	8767800	8768100	0.342482	0.929982	16.4033	26.075
								Chr1	12846900	12847200	0.406633	0.931397	44.5317	66.2525
								Chr2	10636200	10636500	0.345928	0.931565	128.937	156.71
								Chr5	13863000	13863300	-0.442791	0.931574	24.8167	12.755
								Chr2	15174000	15174300	-0.383608	0.932195	21.57	10.865
								Chr3	5453400	5453700	0.33186	0.932706	27.63	41.32
								Chr3	15365700	15366000	-0.346361	0.932978	61.61	41.765
								Chr2	2951100	2951700	-0.37134	0.933068	318.313	230.39
								Chr2	5401200	5401500	-0.310406	0.933272	484.067	325.99
								Chr2	4756800	4757100	0.351413	0.933519	17.3133	26.8625
								Chr3	12834900	12835200	0.251467	0.933742	54.6883	69.7975
								Chr2	2696100	2696400	0.207324	0.934693	116.157	119.66
								Chr3	15625800	15627000	0.355447	0.934803	106.197	140.01
								Chr4	2079300	2079600	0.222583	0.934963	1235.88	1499.3
								Chr5	10527900	10528800	-0.33887	0.935634	191.393	147.54
								Chr4	2314500	2315100	0.0931473	0.937203	105.207	79.94
								Chr2	4538700	4539000	0.286488	0.938172	466.453	588.582
								Chr5	13973400	13973700	-0.331833	0.938253	177.32	121.915
								Chr4	5555400	5557200	-0.169311	0.938347	788.343	730.415
								Chr2	4351200	4351500	-0.33547	0.938747	69.7967	52.225
								Chr2	5948100	5948400	-0.200216	0.939484	781.082	645.702
								Chr3	12806100	12806400	0.140238	0.939646	78.0817	77.6275
								Chr4	2794200	2794800	-0.372862	0.94033	86.5	63.125
								Chr4	2876400	2876700	0.38558	0.940995	49.5767	70.52
								Chr2	1851000	1851300	-0.318772	0.941687	259.847	201.805
								Chr1	12929100	12929400	0.139193	0.941698	279.883	308.93
								Chr1	16324200	16325700	0.389167	0.941972	62.38	92.715
								Chr1	13909200	13910100	0.123562	0.941987	758.347	801.32
								Chr5	10838700	10839900	0.305587	0.942101	606.1	714.857
								Chr1	24462600	24462900	0.328014	0.942103	52.3583	69.2975
								Chr1	13108800	13109100	-0.284886	0.942218	720.27	635.73
								Chr2	2357700	2358600	-0.389371	0.942218	91.5633	58.475
								Chr5	14600700	14601600	-0.405775	0.942218	37.6767	41.67
								Chr5	10166700	10167000	0.356735	0.942308	33.0867	48.1075
								Chr4	8262300	8262900	-0.373666	0.943068	579.047	383.155
								Chr1	12510900	12511200	-0.0365145	0.943759	343.067	306.155
								Chr3	12241800	12242700	-0.342494	0.944475	3661.29	2615.31
								Chr4	2388600	2388900	-0.402867	0.945118	25.0267	15.2325
								Chr5	10688100	10688400	0.194182	0.945612	106.27	123.435
								Chr5	10918800	10919100	-0.371667	0.946173	110.46	75.065
								Chr3	11621400	11621700	0.356423	0.947171	61.34	93.84
								Chr5	10671300	10672500	-0.310764	0.947774	75.1167	54.3875
								Chr5	25048500	25048800	0.218298	0.948084	84.1233	94.3125
								Chr2	4102500	4102800	0.274093	0.948173	155.292	192.882
								Chr4	1643100	1643400	0.290434	0.948291	139.018	175.528
								Chr1	22085100	22085400	0.159879	0.94862	233.665	265.33
								Chr1	21990900	21991200	-0.343184	0.948982	158.183	114.77
								Chr3	12658500	12658800	-0.162038	0.94911	58.4117	51.955
								Chr1	12926100	12927000	0.371393	0.94951	72.42	98
								Chr2	5432700	5433000	-0.206207	0.949761	454.313	358.803
								Chr2	5402100	5404500	-0.246228	0.949812	83.7567	76.8625
								Chr1	21858300	21858600	0.401392	0.949859	32.835	49.935
								Chr3	8547300	8547600	-0.194903	0.9503	57.3933	43.7575
								Chr5	1110000	1110300	0.428476	0.950597	16.6367	27.775
								Chr1	16860900	16861800	0.0560694	0.95062	44.1333	61.545
								Chr3	11643300	11643600	-0.346243	0.951121	38.665	26.4925
								Chr2	7682400	7682700	-0.144274	0.951304	92.5717	95.72
								Chr2	5154300	5154600	0.358818	0.951728	35.1433	51.02
								Chr4	3776100	3776400	0.308157	0.95189	215.997	278.59
								Chr2	3937800	3938700	0.373001	0.952156	94.635	133.235
								Chr5	12652500	12652800	-0.223246	0.952237	30.5783	26.8625
								Chr2	2485800	2486700	0.30097	0.95256	282.447	366.06
								Chr5	12491100	12491700	0.349147	0.953561	47.4733	59.305
								Chr3	13530900	13531200	0.297716	0.954339	20.85	28.69
								Chr5	10935300	10935600	0.282303	0.954645	59.9017	81.9325
								Chr1	16175100	16175400	0.386247	0.954937	43.4833	64.18
								Chr2	4322100	4322400	0.209878	0.955237	188.738	231.78
								Chr2	4330500	4331400	-0.30388	0.955669	614.687	531.79
								Chr1	11817000	11817300	0.396392	0.955851	27.0667	43.22
								Chr2	5510400	5511000	0.330943	0.956044	84.9833	152.16
								Chr5	10858800	10859100	0.424258	0.956262	15.02	22.905
								Chr5	13975200	13975500	0.282097	0.956305	554.993	693.415
								Chr5	12447900	12448200	0.286477	0.956615	74.04	96.9275
								Chr1	13236300	13236600	-0.164918	0.95685	335.068	321.727
								Chr5	14801100	14801400	0.304468	0.956871	49.355	66.995
								Chr2	2637000	2637600	0.323008	0.95697	48.3467	65.665
								Chr1	13524900	13525200	0.16487	0.957065	301.202	355.058
								Chr3	16171500	16171800	-0.342164	0.957357	16.57	9.94
								Chr1	16034400	16034700	0.411073	0.957444	25.27	38.675
								Chr1	22107600	22107900	0.404503	0.957621	35.82	49.605
								Chr1	13986600	13986900	-0.0793337	0.957783	85.15	85.995
								Chr4	4866000	4866300	0.240606	0.958242	114.24	140.04
								Chr1	4415400	4416000	-0.397707	0.95867	96.47	63.83
								Chr5	10818300	10818600	-0.098587	0.959352	188.892	177.012
								Chr5	10914900	10915200	-0.283322	0.960485	96.2183	74.76
								Chr1	17091600	17091900	0.336736	0.960563	88.33	119.02
								Chr4	3521100	3521400	0.250079	0.960645	102.737	131.91
								Chr1	11660700	11661300	0.106026	0.960704	56.91	69.37
								Chr2	4374300	4374600	0.190173	0.96095	169.17	203.125
								Chr5	12261600	12261900	0.409681	0.961474	27.58	42.015
								Chr2	10872900	10873200	0.346691	0.961961	41.8583	59.7275
								Chr5	10779900	10780200	0.288652	0.962321	149.077	187.363
								Chr5	10670700	10671000	-0.291216	0.962925	111.218	85.0675
								Chr2	6048300	6048600	0.270815	0.963866	16.375	22.1675
								Chr2	5386200	5386800	0.32072	0.963968	138.847	183.54
								Chr2	3572400	3573000	-0.330525	0.964613	127.703	99.5
								Chr3	12624600	12624900	0.343087	0.964613	75.02	89.005
								Chr5	10134600	10134900	-0.389738	0.964613	10.3833	4.505
								Chr3	12602100	12602400	0.282012	0.964685	38.2633	51.8025
								Chr1	18189600	18189900	0.417839	0.965133	8.77	26.31
								Chr2	1344900	1345200	-0.247723	0.965135	91.5917	75.82
								Chr1	24682800	24683400	0.269346	0.965557	14.7717	22.915
								Chr4	1967700	1968000	0.25194	0.966012	118.175	144.425
								Chr2	2362800	2363400	-0.249807	0.966134	75.4167	60.495
								Chr2	5083800	5084100	-0.32997	0.966432	43.08	33.015
								Chr1	16452300	16452600	-0.337155	0.966904	113.587	82.97
								Chr5	15699900	15700200	-0.341991	0.967105	109.072	81.895
								Chr2	2193900	2194200	0.231123	0.967603	252.145	303.858
								Chr3	16935300	16935900	-0.364151	0.967692	67.8117	48.5
								Chr2	486000	486300	-0.394037	0.967774	33.6667	21.395
								Chr1	12558300	12558600	-0.268148	0.967808	144.002	115.455
								Chr2	5313900	5314500	-0.298957	0.968651	35.23	15.775
								Chr2	5436900	5437500	0.267367	0.968651	489.66	531.85
								Chr5	14076000	14076300	-0.293243	0.968705	231.16	182.11
								Chr2	6247500	6247800	-0.284467	0.969118	35.8883	25.85
								Chr2	2580000	2580300	0.294842	0.96941	281.363	355.845
								Chr2	8626800	8627100	0.365457	0.96941	91.4167	131.3
								Chr1	30166200	30166500	-0.372728	0.969837	80.96	50.92
								Chr2	4542000	4542300	0.300593	0.969848	200.583	248.305
								Chr5	18306600	18306900	0.291485	0.969848	17.27	22.185
								Chr3	7566600	7567200	0.31987	0.971042	47.2433	60.035
								Chr5	10831800	10833900	0.363292	0.971078	95.1333	139.205
								Chr5	10844400	10845000	0.274747	0.971554	1253.31	1748.09
								Chr5	21803100	21803400	-0.07037	0.971634	31.2433	33.9475
								Chr5	13978500	13979100	0.243802	0.971996	851.103	951.17
								Chr2	6089400	6089700	0.075672	0.972328	76.2017	95.045
								Chr1	15942000	15942300	0.33063	0.97296	83.4367	115.695
								Chr3	17260500	17260800	0.363692	0.97296	55.43	76.87
								Chr1	13240200	13240800	-0.262654	0.97309	863.74	704.515
								Chr1	13480200	13480500	-0.370939	0.97309	52.7267	39.065
								Chr2	5178600	5178900	0.354737	0.97309	61.75	86.785
								Chr3	12013200	12013500	0.323315	0.97309	433.22	567.915
								Chr5	12547200	12547500	0.34155	0.97309	96.56	117.155
								Chr5	15021600	15021900	0.385725	0.973127	24.58	18.83
								Chr5	21014100	21014400	0.030254	0.973572	20.0933	21.0075
								Chr3	11152200	11152500	0.389152	0.973586	19.9433	28.19
								Chr2	6445500	6445800	0.071787	0.974017	46.8383	52.285
								Chr4	14310000	14310300	-0.397921	0.974179	14.8367	10.125
								Chr3	11768100	11768400	-0.19736	0.974287	191.258	157.9
								Chr1	13343400	13343700	0.36998	0.974442	37.0467	53.32
								Chr2	4894500	4894800	0.292035	0.974624	49.5283	63.835
								Chr3	20751300	20751600	-0.316763	0.974746	38.8533	28.3725
								Chr5	19414500	19414800	-0.24704	0.974806	14.3667	10.325
								Chr4	6830700	6831000	-0.358314	0.975148	21.6767	13.1375
								Chr2	565800	566400	0.345374	0.975203	57.32	58.595
								Chr2	4541100	4541400	0.172462	0.975368	118.238	139.472
								Chr2	12886200	12887400	0.264004	0.975535	26.2217	31.3725
								Chr1	21740400	21741000	-0.329565	0.975782	123.707	90.375
								Chr3	15570900	15571200	0.202581	0.976313	128.038	148.08
								Chr4	3724500	3724800	0.283258	0.976623	60.1167	77.7175
								Chr1	13288500	13288800	0.261802	0.976794	253.648	311.442
								Chr1	13241100	13241700	-0.271781	0.9769	735.313	555.71
								Chr3	11894700	11895000	-0.381122	0.977094	39.8217	24.3725
								Chr2	1917000	1917300	-0.361743	0.977336	67.97	48.44
								Chr1	16449600	16452000	-0.264165	0.977511	447.235	354.085
								Chr1	5394900	5395800	0.291005	0.977625	28.79	37.6875
								Chr2	13024500	13024800	-0.292807	0.978013	65.91	52.565
								Chr3	15219300	15219600	0.208005	0.978144	107.455	132.055
								Chr1	11027400	11028000	0.373729	0.978611	36.82	53.71
								Chr3	3587100	3587400	0.325439	0.979072	28.205	42.7275
								Chr5	13695000	13695900	-0.262396	0.97917	140.97	106.33
								Chr2	2912100	2912400	0.370729	0.980478	24.8183	38.7025
								Chr5	13472400	13472700	-0.28095	0.980602	528.773	290.39
								Chr2	1346700	1347000	-0.303515	0.980661	132.3	103.01
								Chr4	1656300	1656600	0.110591	0.980676	190.635	190.5
								Chr2	2969100	2969400	0.293364	0.980729	108.557	144.485
								Chr1	23856300	23856600	-0.23044	0.980926	51.21	39.4025
								Chr2	6637200	6637500	-0.383534	0.981023	40.6867	15.79
[truncated: 1,582 more rows]
